# Supplementary material for: mRNA poly(A)-tail changes specified by deadenylation broadly reshape translation in Drosophila oocytes and early embryos
Source: eLife journal article supplement (doi:10.7554/elife.16955), 2016-07-30
Supplement: supp [file elife-16955-supp-v1.zip]

Archive with 10 entries (10 files):
- elife_poa_e16955_Figure_6&#x2212;figure_supplement_1.pdf
- elife_poa_e16955_Supplementary_File_2.xlsx
- elife_poa_e16955_Figure_5&#x2212;figure_supplement_1.pdf
- elife_poa_e16955_Figure_7&#x2212;figure_supplement_1.pdf
- elife_poa_e16955_Supplementary_File_3.xlsx
- elife_poa_e16955_Figure_2&#x2212;figure_supplement_1.pdf
- elife_poa_e16955_Figure_7&#x2212;_figure_supplement_2.pdf
- elife_poa_e16955_Figure_2&#x2212;figure_supplement_2.pdf
- elife_poa_e16955_Figure_1&#x2212;figure_supplement_1.pdf
- elife_poa_e16955_Supplementary_File_1.xlsx
