# Supplementary material for: mRNA poly(A)-tail changes specified by deadenylation broadly reshape translation in Drosophila oocytes and early embryos
Source: eLife journal article supplement (doi:10.7554/elife.16955), 2016-07-30
Supplement: supp [file elife-16955-supp-v1.zip › elife_poa_e16955_Supplementary_File_1.xlsx]

## Sheet: Sheet1
Supplementary File 1. Relationships between RNA-seq, ribosome profiling, and PAL-seq measurements for wild-type samples at different developmental stages.
The Spearman correlation coefficients for all unique pairwise combinations of stages are shown. For the RNA-seq or ribosome-profiling comparisons, all mRNAs with ≥10.0 RPM in both samples of the respective datasets being compared were included. For the PAL-seq comparisons, all mRNAs with ≥100 poly(A) tags in both samples being compared were included.
RNA-seq	Stage 11	Stage 12	Stage 13	Stage 14	Activated Egg	0–1 h Embryo	2–3 h Embryo	3–4 h Embryo	5–6 h Embryo
Stage 11	1	0.977055	0.971343	0.943959	0.938475	0.911819	0.727188	0.665084	0.670525
Stage 12		1	0.976126	0.937223	0.931956	0.907466	0.722308	0.650881	0.659649
Stage 13			1	0.942221	0.939762	0.915176	0.721365	0.648737	0.656224
Stage 14				1	0.969526	0.930118	0.728771	0.689621	0.670004
Activated Egg					1	0.970091	0.705976	0.660888	0.645089
0–1 h Embryo						1	0.635348	0.601185	0.593133
2–3 h Embryo							1	0.820819	0.75365
3–4 h Embryo								1	0.899488
5–6 h Embryo									1
Ribosome profiling	Stage 11	Stage 12	Stage 13	Stage 14	Activated Egg	0–1 h Embryo	2–3 h Embryo	3–4 h Embryo	5–6 h Embryo
Stage 11	1	0.912794	0.849037	0.747878	0.495692	0.586464	0.532836	0.570016	0.574567
Stage 12		1	0.890618	0.749649	0.479481	0.572464	0.502443	0.532685	0.542218
Stage 13			1	0.826288	0.527656	0.617959	0.520205	0.561424	0.566815
Stage 14				1	0.6086	0.688511	0.589037	0.61156	0.607918
Activated Egg					1	0.924885	0.873468	0.705362	0.663457
0–1 h Embryo						1	0.829514	0.745211	0.708287
2–3 h Embryo							1	0.822086	0.73832
3–4 h Embryo								1	0.906587
5–6 h Embryo									1
PAL-seq	Stage 11	Stage 12	Stage 13	Stage 14	Activated Egg	0–1 h Embryo	2–3 h Embryo	3–4 h Embryo	5–6 h Embryo
Stage 11	1	0.939454	0.793747	0.455753	-0.00154339	0.212896	-0.064538	-0.00714859	-0.0183182
Stage 12		1	0.878339	0.527697	0.0643926	0.299316	-0.0641156	-0.00844238	-0.0211778
Stage 13			1	0.69472	0.223104	0.48279	0.0323019	0.0142606	0.00843249
Stage 14				1	0.453132	0.722124	0.169111	0.119624	0.141162
Activated Egg					1	0.855478	0.589347	0.0840563	0.22367
0–1 h Embryo						1	0.400501	0.211548	0.284411
2–3 h Embryo							1	0.212652	0.318612
3–4 h Embryo								1	0.680197
5–6 h Embryo									1
