# Supplementary material for: mRNA poly(A)-tail changes specified by deadenylation broadly reshape translation in Drosophila oocytes and early embryos
Source: eLife journal article supplement (doi:10.7554/elife.16955), 2016-07-30
Supplement: supp [file elife-16955-supp-v1.zip › elife_poa_e16955_Supplementary_File_2.xlsx]

## Sheet: Stage 11 oocytes wt
Supplementary File 2A. Processed RNA-seq, ribosome profiling, and PAL-seq data for wild-type stage 11 oocytes.
Initial Refseq ID is the dm6 Refseq ID that was selected for each gene on the basis of being the longest annotated isoform of that gene. For many genes, the 3' end of this gene model was extended to include the most distal isoform supported by PAL-seq data. RPKM is reads per kilobase per million mapped reads. Descriptions of the analyses include the measurement cutoffs applied to RNA-seq, ribosom…
Gene name	Initial Refseq ID	RNA (RPKM)	RPF (RPKM)	TE	Poly(A) tags	Mean poly(A)-tail length	Passing RNA cutoff (>=10 RPM)	Passing RPF cutoff(>=10 RPM)	Passing poly(A)-tag cutoff (>=100 tags)	Excluded from analysis
CG11790	NM_170192	83.5883	71.5406	0.855869	274	54.8051	Yes	Yes	Yes	No
CG11796	NM_140968	0	0	NA	0	NA	No	No	No	No
CG12081	NM_001272414	24.8149	0.925856	0.0373105	221	26.4856	Yes	No	Yes	No
CG13321	NM_001299438	0.19863	0.663283	3.33929	3	81.1004	No	No	No	No
CG13322	NM_165963	40.1457	4.22452	0.10523	228	29.5775	Yes	No	Yes	No
CG13323	NM_001299441	0	0	NA	0	NA	No	No	No	No
CG13324	NM_136989	0	0	NA	0	NA	No	No	No	No
CG13325	NM_001299444	0	0	NA	0	NA	No	No	No	No
CG13326	NM_136994	0.0946097	0	0	0	NA	No	No	No	No
CG14247	NM_143245	0	0	NA	1	18.3041	No	No	No	No
rictor	NM_133143	26.9553	2.75451	0.102188	144	31.6624	Yes	Yes	Yes	No
CG4101	NM_140651	26.7227	12.5683	0.470323	200	39.2534	No	No	Yes	No
Syt1	NM_001273037	0	0	NA	10	49.7393	No	No	No	No
SPR	NM_001297964	0	0	NA	0	NA	No	No	No	No
snRNP-U1-70K	NM_001273244	50.7362	19.0782	0.376028	252	33.1124	Yes	Yes	Yes	No
Syt4	NM_058116	0	0	NA	0	NA	No	No	No	No
CG8654	NM_001299695	0.165616	1.29042	7.79168	0	NA	No	No	No	No
Syt7	NM_205871	0.903865	0	0	4	35.5713	No	No	No	No
Sac1	NM_138243	60.6529	34.3785	0.566807	448	47.9753	Yes	Yes	Yes	No
Cyp6a19	NM_001299505	318.204	563.696	1.77149	1132	72.9998	Yes	Yes	Yes	No
Cyp6a18	NM_001300633	0	0	NA	0	NA	No	No	No	No
Cyp6a17	NM_001299504	0.110638	0	0	0	NA	No	No	No	No
Cyp6a16	NM_001298702	0	0	NA	0	NA	No	No	No	No
Cyp6a14	NM_001299270	1.14441	0.181977	0.159014	7	48.2039	No	No	No	No
Cyp6a13	NM_136546	1.23741	2.81733	2.27679	7	55.7712	No	No	No	No
bocks	NM_001014611	28.0855	7.71802	0.274805	198	33.3824	Yes	No	Yes	No
eIF2B-epsilon	NM_206606	21.8621	4.66566	0.213413	146	34.7959	Yes	No	Yes	No
Tektin-C	NM_001274520	0	0	NA	0	NA	No	No	No	No
Tektin-A	NM_001273547	0	0	NA	0	NA	No	No	No	No
CG13492	NM_166487	0	0	NA	0	NA	No	No	No	No
CG31710	NM_001273365	20.5113	65.1521	3.1764	101	60.7053	No	Yes	Yes	No
CG31712	NM_001273379	20.011	20.0468	1.00179	258	49.2764	Yes	Yes	Yes	No
CG31715	NM_164917	149.109	280.877	1.8837	403	49.816	Yes	Yes	Yes	No
NimB5	NM_001298990	0	0	NA	0	NA	No	No	No	No
CG13494	NM_137777	0	0	NA	0	NA	No	No	No	No
shtd	NM_132797	17.7136	13.9755	0.788967	139	63.9841	Yes	Yes	Yes	No
CG4049	NM_138041	27.135	1.13875	0.041966	222	32.7312	Yes	No	Yes	No
CG4041	NM_131969	26.1686	7.81215	0.298532	110	60.7219	Yes	Yes	Yes	No
CG4042	NM_001275192	49.9275	50.7852	1.01718	107	68.4204	Yes	Yes	Yes	No
CG4045	NM_130622	29.0451	20.8902	0.719232	174	43.6904	Yes	Yes	Yes	No
14-3-3zeta	NM_165742	352.339	478.882	1.35915	1610	29.759	Yes	Yes	Yes	No
FeCH	NM_170579	55.4502	95.2853	1.71839	431	54.3499	Yes	Yes	Yes	No
Oli	NM_078868	0	0	NA	0	NA	No	No	No	No
Gp210	NM_001273785	54.3072	28.819	0.530666	298	44.4751	Yes	Yes	Yes	No
CG31698	NM_001298647	0	0	NA	3	0.51377	No	No	No	No
Prp38	NM_136619	26.6488	7.70091	0.288977	93	26.424	Yes	No	No	No
RpL24-like	NM_141816	239.49	58.292	0.243401	1303	36.3325	Yes	Yes	Yes	No
Rtf1	NM_001299788	82.8427	5.54925	0.0669854	481	38.0736	Yes	Yes	Yes	No
CG14569	NM_141097	0	0	NA	0	NA	No	No	No	No
CG14568	NM_141098	0	0	NA	0	NA	No	No	No	No
CG14567	NM_141100	0	0	NA	0	NA	No	No	No	No
CG14566	NM_141101	0	0	NA	0	NA	No	No	No	No
CG14565	NM_141103	0	0	NA	0	NA	No	No	No	No
CG14564	NM_141104	0	0	NA	0	NA	No	No	No	No
CG14563	NM_141112	0	0	NA	0	NA	No	No	No	No
CG14562	NM_001275270	15.4873	1.23837	0.0799602	154	27.5522	Yes	No	Yes	No
CG14561	NM_001275272	42.9068	1.50819	0.0351504	611	28.9544	Yes	No	Yes	No
CG13185	NM_001103809	8.70198	0.276592	0.031785	86	28.3085	Yes	No	No	No
vig2	NM_170206	276.114	58.3617	0.211368	2003	30.4587	Yes	Yes	Yes	No
CG8204	NM_137206	26.1453	29.5717	1.13105	55	41.8057	No	Yes	No	No
CG10674	NM_139693	79.3813	132.053	1.66353	388	50.7992	Yes	Yes	Yes	No
CG10672	NM_139689	45.8854	96.6952	2.10732	175	64.7023	Yes	Yes	Yes	No
Mst77F	NM_079464	0	0	NA	0	NA	No	No	No	No
CG12811	NM_141715	46.2915	60.3009	1.30263	100	60.0821	Yes	Yes	Yes	No
Pif2	NM_169147	0	0	NA	0	NA	No	No	No	No
CG12814	NM_001043235	0	0.457029	NA	2	86.6221	No	No	No	No
CG12817	NM_001043236	0	0	NA	0	NA	No	No	No	No
CG12818	NM_141739	27.9983	23.3736	0.834823	83	38.1237	Yes	Yes	No	No
CG18446	NM_136685	29.5064	14.266	0.483488	136	51.3514	Yes	Yes	Yes	No
CG8209	NM_139910	69.476	278.912	4.01452	103	50.2943	Yes	Yes	Yes	No
H15	NM_001298698	0.834657	3.06588	3.67322	2	68.3947	No	No	No	No
nocte	NM_001272480	71.1507	49.461	0.695158	367	51.8099	Yes	Yes	Yes	No
Dhap-at	NM_001276028	14.7925	29.5699	1.99898	70	51.506	Yes	Yes	No	No
CG14309	NM_142461	127.752	857.072	6.70886	1068	34.0724	Yes	Yes	Yes	No
Acp63F	NM_079182	0	0	NA	0	NA	No	No	No	No
CG14302	NM_142492	0	0	NA	0	NA	No	No	No	No
CG14301	NM_142477	0.297761	1.98862	6.67858	125	-3.2951	No	No	Yes	No
CG14300	NM_001014639	0	0	NA	0	NA	No	No	No	No
CG7246	NM_132292	27.1534	3.97555	0.146411	155	28.7016	Yes	No	Yes	No
CG7248	NM_140273	0	0	NA	0	NA	No	No	No	No
wtrw	NM_206459	16.048	23.0987	1.43935	161	61.1547	Yes	Yes	Yes	No
FMRFaR	NM_001299996	0	0	NA	0	NA	No	No	No	No
Arl5	NM_139944	94.5164	41.7164	0.441367	423	35.5027	Yes	Yes	Yes	No
nullo	NM_078512	0	0	NA	0	NA	No	No	No	No
CG15919	NM_144117	0	0	NA	0	NA	No	No	No	No
CG9689	NM_132359	0.34129	0.569833	1.66965	3	97.2583	No	No	No	No
CG3906	NM_137958	0	0	NA	0	NA	No	No	No	No
CG3907	NM_138026	7.54449	8.16448	1.08218	26	48.9932	No	No	No	No
CG3902	NM_140812	113.504	173.306	1.52687	444	33.77	Yes	Yes	Yes	No
Br140	NM_001299226	45.6728	4.37387	0.0957652	243	51.1179	Yes	Yes	Yes	No
CG9682	NM_143528	0	0	NA	0	NA	No	No	No	No
CG9684	NM_141540	65.07	23.1888	0.356367	193	27.4235	Yes	Yes	Yes	No
CG9686	NM_132358	0.183473	0	0	1	110.534	No	No	No	No
CG42870	NM_001202336	0	0	NA	0	NA	No	No	No	No
CG42876	NM_001299036	0	0	NA	0	NA	No	No	No	No
CG4557	NM_132132	17.385	4.69119	0.269842	119	36.211	Yes	Yes	Yes	No
p47	NM_136440	118.896	315.926	2.65717	525	76.619	Yes	Yes	Yes	No
Gr66a	NM_079247	0.0525061	0	0	0	NA	No	No	No	No
CG42878	NM_001259507	0	0	NA	0	NA	No	No	No	No
CG2051	NM_141330	101.853	258.138	2.53442	236	87.3062	Yes	Yes	Yes	No
dnd	NM_142738	0.986258	0	0	26	40.3331	No	No	No	No
CG2053	NM_001300703	0	0	NA	0	NA	No	No	No	No
dnc	NM_166968	49.8199	0.0926814	0.00186033	238	35.1664	Yes	No	Yes	No
CG7024	NM_131954	0.0579456	0	0	1	68.526	No	No	No	No
CG2059	NM_132160	26.0828	3.06683	0.117581	241	25.1945	Yes	No	Yes	No
lmd	NM_170044	0	0	NA	0	NA	No	No	No	No
CG7029	NM_176542	29.5148	1.29682	0.043938	196	35.5931	Yes	No	Yes	No
CG7028	NM_001299955	38.6997	9.30212	0.240367	188	41.5991	Yes	Yes	Yes	No
dnk	NM_001275793	267.985	6.12145	0.0228425	790	31.1734	Yes	No	Yes	No
Gr97a	NM_001300622	0	0	NA	0	NA	No	No	No	No
CaMKI	NM_079883	91.509	49.7394	0.543547	341	54.1169	Yes	Yes	Yes	No
dnt	NM_001273638	18.2819	1.41974	0.0776579	62	31.5454	Yes	No	No	No
Jon44E	NM_001299274	0	0	NA	0	NA	No	No	No	No
Ostgamma	NM_135360	43.8169	112.091	2.55817	148	74.0034	Yes	Yes	Yes	No
BoYb	NM_141173	18.5021	1.97639	0.10682	129	30.9964	Yes	No	Yes	No
CG5089	NM_137298	0	0	NA	0	NA	No	No	No	No
CheA84a	NM_001031979	0	0	NA	0	NA	No	No	No	No
CG3347	NM_164530	0	0	NA	0	NA	No	No	No	No
CG5080	NM_164406	2.64325	4.16349	1.57514	93	45.8188	No	No	No	No
CG5087	NM_140022	18.1711	6.66707	0.366904	88	48.5749	Yes	Yes	No	No
CG5084	NM_001299627	0	0	NA	0	NA	No	No	No	No
CG1979	NM_141428	0.0260325	0	0	0	NA	No	No	No	No
M1BP	NM_141568	32.6982	14.7071	0.449782	241	30.5519	Yes	Yes	Yes	No
CG1971	NM_143643	21.3844	8.33708	0.389866	108	29.9667	Yes	No	Yes	No
CG45061	NM_001298134	0	0	NA	0	NA	No	No	No	No
CG9356	NM_141632	32.9133	15.3455	0.466241	172	34.5287	Yes	Yes	Yes	No
CG11231	NM_143696	0	0	NA	1	7.73609	No	No	No	No
CG11236	NM_135231	0	0	NA	0	NA	No	No	No	No
CG16956	NM_135810	8.05444	31.7863	3.94644	24	56.3307	No	Yes	No	No
CG8331	NM_001201998	254.732	763.798	2.99844	698	67.9491	Yes	Yes	Yes	No
CG8336	NM_168354	41.5878	23.6745	0.569264	137	49.184	Yes	Yes	Yes	No
CG16952	NM_206740	31.4099	3.81568	0.12148	230	35.9742	Yes	Yes	Yes	No
CG8335	NM_136366	0	0	NA	0	NA	No	No	No	No
MrgBP	NM_136573	42.1554	11.1261	0.26393	215	38.1924	Yes	No	Yes	No
CG16959	NM_140493	0.440736	0	0	1	88.0699	No	No	No	No
pinta	NM_001300537	24.5181	9.75507	0.397873	79	46.6927	Yes	No	No	No
CG33125	NM_175950	0	0	NA	0	NA	No	No	No	No
CG45095	NM_001300590	0	0	NA	0	NA	No	No	No	No
Sox102F	NM_001014695	1.87209	0.595376	0.318028	10	25.8388	No	No	No	No
FRG1	NM_140945	44.4684	44.4023	0.998514	126	33.1267	Yes	Yes	Yes	No
cype	NM_001258957	439.93	1254.18	2.85086	1692	77.2219	Yes	Yes	Yes	No
yata	NM_001276153	39.0509	7.21552	0.184772	160	58.8105	Yes	Yes	Yes	No
ND-20L	NM_001300655	0	0	NA	0	NA	No	No	No	No
Dbx	NM_139420	0.0740298	0	0	0	NA	No	No	No	No
s-cup	NM_136948	0	0	NA	0	NA	No	No	No	No
how	NM_001275893	32.0977	39.2189	1.22186	172	37.5774	Yes	Yes	Yes	No
CG9531	NM_135187	15.5498	1.75029	0.11256	63	24.9825	Yes	No	No	No
CG9536	NM_135189	36.0379	34.4716	0.956538	330	56.8641	Yes	Yes	Yes	No
hop	NM_078564	36.1109	6.33032	0.175302	196	32.3571	Yes	Yes	Yes	No
CG6379	NM_001297922	11.9583	1.2769	0.10678	65	28.9518	Yes	No	No	No
ppk31	NM_001104474	0	0	NA	0	NA	No	No	No	No
ppk30	NM_001276147	0	0	NA	0	NA	No	No	No	No
CG1358	NM_136457	20.0354	34.0287	1.69843	67	78.3419	Yes	Yes	No	No
CG8485	NM_137098	58.5084	1.91129	0.032667	305	28.2343	Yes	No	Yes	No
CG1354	NM_167202	130.603	78.9956	0.604853	368	83.8335	Yes	Yes	Yes	No
CG8481	NM_001014612	45.1512	56.885	1.25988	431	36.7591	Yes	Yes	Yes	No
smt3	NM_058063	1007.35	1190.43	1.18174	1199	35.4901	Yes	Yes	Yes	No
BG642163	NM_001298675	0	0	NA	0	NA	No	No	No	No
Edg91	NM_079666	2.43506	25.6451	10.5316	7	43.1723	No	Yes	No	No
CG30091	NM_166110	0	0	NA	0	NA	No	No	No	No
CG30090	NM_166112	0	0	NA	0	NA	No	No	No	No
CG30095	NM_166143	0	0	NA	0	NA	No	No	No	No
CG30094	NM_166149	36.5775	74.026	2.02381	121	58.0843	Yes	Yes	Yes	No
CG30096	NM_166162	16.9011	12.3458	0.73047	69	30.8311	Yes	No	No	No
eIF-1A	NM_001300457	331.916	613.801	1.84927	663	69.3871	Yes	Yes	Yes	No
Myo10A	NM_001042804	1.01238	0.057299	0.0565982	9	30.8932	No	No	No	No
Nup43	NM_142459	44.3112	77.5195	1.74943	133	74.3818	Yes	Yes	Yes	No
Spp	NM_078720	83.1334	248.549	2.98976	316	47.5272	Yes	Yes	Yes	No
Patronin	NM_001144218	24.2676	13.9324	0.574116	128	37.1326	Yes	Yes	Yes	No
Usp8	NM_142691	25.1606	20.0626	0.797382	94	46.2282	Yes	Yes	No	No
Usp1	NM_143430	48.5238	22.111	0.455674	246	60.2535	Yes	Yes	Yes	No
Usp2	NM_001258871	21.5697	0.874829	0.0405582	137	49.6606	Yes	No	Yes	No
Usp5	NM_139516	62.3773	184.538	2.95842	162	74.9343	Yes	Yes	Yes	No
Usp7	NM_132551	78.0606	69.0925	0.885113	303	58.7071	Yes	Yes	Yes	No
CG17571	NM_001299167	0	0	NA	0	NA	No	No	No	No
CG17570	NM_136266	2.04197	0	0	8	90.4951	No	No	No	No
CG17572	NM_136097	0	0	NA	0	NA	No	No	No	No
CG17575	NM_001201988	0	0	NA	0	NA	No	No	No	No
Set1	NM_001110936	41.1973	2.92349	0.0709633	352	40.3986	Yes	Yes	Yes	No
Set2	NM_132660	39.6257	0.955254	0.0241069	214	30.901	Yes	No	Yes	No
Spn27A	NM_001273214	31.807	25.7737	0.810317	67	51.6242	Yes	Yes	No	No
Mis12	NM_139809	31.5033	119.297	3.78683	139	59.8291	Yes	Yes	Yes	No
inaD	NM_001259541	0.0400519	0.26749	6.67858	1	113.786	No	No	No	No
inaE	NM_001298302	29.6208	0.628414	0.0212153	0	NA	Yes	No	No	No
Set8	NM_169577	79.0337	2.6551	0.0335945	349	32.1917	Yes	No	Yes	No
inaC	NM_057515	0	0	NA	0	NA	No	No	No	No
CG9825	NM_137879	0	0	NA	0	NA	No	No	No	No
Pcf11	NM_137155	16.0756	6.8027	0.423169	49	36.9252	Yes	Yes	No	No
CG9826	NM_206202	0	1.49631	NA	0	NA	No	No	No	No
CG9821	NM_001275461	421.961	69.5704	0.164874	1685	38.1508	Yes	Yes	Yes	No
ATPsynbetaL	NM_140579	0	0	NA	0	NA	No	No	No	No
CG9822	NM_137737	0	0	NA	0	NA	No	No	No	No
CG44270	NM_001299176	0	0	NA	0	NA	No	No	No	No
CG44271	NM_001298760	0	0	NA	0	NA	No	No	No	No
Vsx1	NM_001297969	0.0326885	0	0	0	NA	No	No	No	No
CG31717	NM_001273388	38.4903	103.3	2.6838	72	64.027	Yes	Yes	No	No
Hil	NM_166402	1.50582	0.335224	0.222619	13	35.7623	No	No	No	No
Him	NM_133045	0	0	NA	0	NA	No	No	No	No
MRP	NM_205980	44.7897	10.9923	0.245421	423	37.3344	Yes	Yes	Yes	No
Tsp68C	NM_168558	0	0	NA	0	NA	No	No	No	No
PH4alphaNE2	NM_170499	0	0	NA	0	NA	No	No	No	No
CG43131	NM_001259995	0	0	NA	0	NA	No	No	No	No
CG43133	NM_001258806	0	0	NA	0	NA	No	No	No	No
CG43134	NM_001258595	350.105	2005.72	5.72891	729	71.5902	Yes	Yes	Yes	No
CG43135	NM_001258596	0	3.5624	NA	6	62.8861	No	No	No	No
CG43136	NM_001258609	0	0	NA	0	NA	No	No	No	No
CG43137	NM_001258610	0	0	NA	0	NA	No	No	No	No
CG43138	NM_001258634	0	0	NA	0	NA	No	No	No	No
CG43139	NM_001260409	0	0	NA	0	NA	No	No	No	No
PH4alphaNE1	NM_170495	0	0	NA	0	NA	No	No	No	No
CG42269	NM_139762	0.373852	0.277423	0.742065	3	33.5084	No	No	No	No
CG42268	NM_168368	0.661405	2.02457	3.06102	19	63.6799	No	No	No	No
Droj2	NM_169519	448.401	317.8	0.708741	3630	38.4279	Yes	Yes	Yes	No
CG42266	NM_001144355	0	0	NA	0	NA	No	No	No	No
CG42265	NM_001144688	0	0	NA	1	19.5496	No	No	No	No
CG42264	NM_132032	0	0	NA	0	NA	No	No	No	No
CG42263	NM_001144511	0	0	NA	0	NA	No	No	No	No
CG42261	NM_143196	0	0	NA	0	NA	No	No	No	No
CG42260	NM_137873	0.0280155	0	0	0	NA	No	No	No	No
Plod	NM_140194	15.4542	9.1518	0.59219	126	35.4094	Yes	Yes	Yes	No
RhoGAP18B	NM_133124	12.7501	2.68686	0.210732	168	40.9768	Yes	Yes	Yes	No
CG5348	NM_001259446	0	0	NA	0	NA	No	No	No	No
Trs23	NM_135403	35.6508	18.9596	0.531813	98	38.0996	Yes	Yes	No	No
whip	NM_001103760	0	0	NA	0	NA	No	No	No	No
rt	NM_079301	18.2004	0	0	171	15.2982	Yes	No	Yes	No
ru	NM_080051	0.082525	0	0	0	NA	No	No	No	No
dsx	NM_001300291	0	0	NA	0	NA	No	No	No	No
CSN5	NM_058094	74.5941	169.325	2.26995	268	74.4652	Yes	Yes	Yes	No
CG5506	NM_140764	0	0	NA	0	NA	No	No	No	No
ry	NM_079613	0.0406996	0	0	0	NA	No	No	No	No
CG5500	NM_143254	41.3367	10.6637	0.257971	185	47.4018	Yes	No	Yes	No
smo	NM_078719	27.8919	12.7407	0.45679	233	46.7392	Yes	Yes	Yes	No
CG31388	NM_001260113	9.20841	3.50311	0.380426	38	43.5316	No	No	No	No
CSN7	NM_136535	59.3593	133.968	2.2569	242	55.1749	Yes	Yes	Yes	No
rb	NM_080332	51.8975	17.0794	0.329098	145	53.374	Yes	Yes	Yes	No
smg	NM_001144452	585.543	2.05001	0.00350104	4522	39.3437	Yes	No	Yes	No
rn	NM_001275414	0	0	NA	0	NA	No	No	No	No
Spred	NM_001274050	34.0314	1.24684	0.036638	234	47.0045	Yes	No	Yes	No
dsb	NM_001104007	11.0648	46.8214	4.23157	122	57.6645	Yes	Yes	Yes	No
rk	NM_057354	0	0	NA	0	NA	No	No	No	No
CG42402	NM_001276243	0.186101	0	0	1	25.9664	No	No	No	No
Su(z)12	NM_143802	58.793	13.2451	0.225284	286	41.5492	Yes	Yes	Yes	No
CG42404	NM_001043248	0	0	NA	0	NA	No	No	No	No
CG5342	NM_141831	0	0	NA	0	NA	No	No	No	No
Egm	NM_136843	20.2869	18.2664	0.900403	56	41.4285	Yes	Yes	No	No
Mst57Dc	NM_079774	0	0	NA	0	NA	No	No	No	No
Mst57Db	NM_079775	0	0	NA	0	NA	No	No	No	No
Mst57Da	NM_080167	0	0	NA	0	NA	No	No	No	No
wfs1	NM_142822	17.8275	13.3838	0.75074	52	48.6481	Yes	Yes	No	No
CG6974	NM_142157	0	0	NA	0	NA	No	No	No	No
CG6972	NM_001316516	0	0	NA	0	NA	No	No	No	No
FMRFa	NM_078945	0	0	NA	0	NA	No	No	No	No
CG6971	NM_141871	0	0	NA	0	NA	No	No	No	No
ato	NM_169213	0	0	NA	0	NA	No	No	No	No
Vinc	NM_001297885	30.9284	77.1035	2.49297	123	57.1764	Yes	Yes	Yes	No
atk	NM_140971	0	0	NA	1	120.796	No	No	No	No
CG6978	NM_131960	0.0579456	0	0	0	NA	No	No	No	No
CG14174	NM_140094	9.72367	2.97643	0.306102	29	28.5166	No	No	No	No
rnh1	NM_057967	42.8104	12.431	0.290373	59	55.5174	Yes	Yes	No	No
Xbp1	NM_079983	81.0974	44.0063	0.542635	290	29.0854	Yes	Yes	Yes	No
CG18659	NM_001259289	37.9567	8.33871	0.21969	270	31.0085	Yes	Yes	Yes	No
mus101	NM_080170	24.9558	18.8934	0.757076	123	32.564	Yes	Yes	Yes	No
CG15225	NM_137672	0	0	NA	0	NA	No	No	No	No
CG18304	NM_001273241	0.754748	0.0475533	0.0630055	1	174.915	No	No	No	No
CG18870	NM_001299755	34.2188	67.9422	1.98552	273	94.2983	Yes	Yes	Yes	No
CG15553	NM_143584	0	0	NA	0	NA	No	No	No	No
CG16753	NM_139507	41.4371	5.00135	0.120697	240	32.5038	Yes	No	Yes	No
alpha-PheRS	NM_132220	67.9089	145.726	2.14591	172	70.8054	Yes	Yes	Yes	No
wash	NM_001299405	47.6045	34.1303	0.716954	221	38.2465	Yes	Yes	Yes	No
Galphao	NM_206079	46.1841	2.91485	0.0631138	203	36.2408	Yes	No	Yes	No
ArfGAP3	NM_141152	57.6175	99.1262	1.72042	303	52.1209	Yes	Yes	Yes	No
ArfGAP1	NM_079316	66.2993	84.8308	1.27951	513	52.4825	Yes	Yes	Yes	No
Sfp84E	NM_001170073	0	0	NA	0	NA	No	No	No	No
CG11426	NM_141137	1.32447	11.3334	8.55693	16	46.8789	No	Yes	No	No
CG33342	NM_001104434	0	0	NA	0	NA	No	No	No	No
Rala	NM_080324	183.977	119.968	0.652082	1234	42.1899	Yes	Yes	Yes	No
Mal-B2	NM_001201862	16.3537	29.5939	1.80962	25	90.0179	Yes	Yes	No	No
DCTN6-p27	NM_136105	37.8939	78.3588	2.06785	104	64.5212	Yes	Yes	Yes	No
CG13689	NM_001272910	18.8392	0.911733	0.0483955	181	28.2104	No	No	Yes	No
Cen	NM_136205	124.267	3.35767	0.0270199	417	36.1936	Yes	No	Yes	No
REPTOR-BP	NM_164904	21.5928	40.0581	1.85516	106	41.9231	No	No	Yes	No
Prp31	NM_140499	37.285	59.4818	1.59533	155	73.8522	Yes	Yes	Yes	No
CG31960	NM_164559	0	0	NA	0	NA	No	No	No	No
CG31961	NM_164571	41.7755	54.4264	1.30283	104	41.1194	Yes	Yes	Yes	No
Ilp3	NM_140103	0	0	NA	0	NA	No	No	No	No
Sucb	NM_143706	28.3012	21.0511	0.743823	210	27.3105	Yes	Yes	Yes	No
xit	NM_132127	12.0871	13.2128	1.09313	28	85.0675	Yes	Yes	No	No
CG4908	NM_164892	23.7238	3.66962	0.154681	53	34.5152	Yes	No	No	No
CG3597	NM_001273001	0	0	NA	0	NA	No	No	No	No
CG3224	NM_132107	55.0418	40.4361	0.734644	203	33.7355	Yes	Yes	Yes	No
CG4907	NM_142829	0	0	NA	0	NA	No	No	No	No
CG3226	NM_132104	265.058	547.125	2.06417	779	42.1612	Yes	Yes	Yes	No
CG4901	NM_135512	46.9414	29.6056	0.630692	145	53.2303	Yes	Yes	Yes	No
CG3223	NM_141501	36.6417	33.0028	0.90069	199	32.8645	Yes	Yes	Yes	No
CG32376	NM_168223	0	0	NA	0	NA	No	No	No	No
Ilp6	NM_130644	0.293958	0.981611	3.33929	1	3.57581	No	No	No	No
CG42470	NM_001169482	0	0	NA	0	NA	No	No	No	No
Cyp4d21	NM_135285	0	0.542991	NA	0	NA	No	No	No	No
CG33521	NM_001014702	0.0423918	0	0	1	227.819	No	No	No	No
Ilp4	NM_140104	0	0	NA	0	NA	No	No	No	No
knk	NM_141724	0.877217	2.52983	2.88393	3	69.6504	No	No	No	No
CG14795	NM_130569	0	0	NA	0	NA	No	No	No	No
CG14797	NM_001258539	0	0	NA	0	NA	No	No	No	No
trem	NM_142604	27.8417	1.69424	0.0608527	109	28.5713	Yes	No	Yes	No
CG14798	NM_130582	2.23218	0	0	13	82.321	No	No	No	No
CG43815	NM_001273070	0	0	NA	0	NA	No	No	No	No
CG10086	NM_141479	0	0	NA	0	NA	No	No	No	No
CG10081	NM_137574	0	0	NA	0	NA	No	No	No	No
CG10082	NM_166466	13.2676	2.83224	0.213471	43	38.6836	Yes	No	No	No
Usp16-45	NM_001297961	67.0518	6.37885	0.0951331	365	45.2979	Yes	Yes	Yes	No
CG3040	NM_132144	24.1513	23.3879	0.968394	202	32.4848	Yes	Yes	Yes	No
CG3045	NM_137802	24.7188	5.75021	0.232625	130	36.4305	Yes	No	Yes	No
CG10089	NM_001274874	0.186734	0.415705	2.22619	0	NA	No	No	No	No
Mo25	NM_079393	56.6302	41.8692	0.739345	208	31.4931	Yes	Yes	Yes	No
RpII18	NM_080171	81.4756	55.9688	0.68694	173	64.3997	Yes	Yes	Yes	No
RpII15	NM_001300397	56.3811	56.9565	1.01021	364	39.8553	Yes	Yes	Yes	No
CG12025	NM_001299978	53.7543	17.4273	0.324203	286	41.5333	Yes	No	Yes	No
CG12795	NM_001103604	122.627	13.9769	0.113979	608	26.2663	Yes	No	Yes	No
cv-2	NM_080070	0.182558	0.243845	1.33572	2	77.9234	No	No	No	No
Asx	NM_001274041	20.7225	2.88572	0.139256	253	28.5379	Yes	Yes	Yes	No
ph-d	NM_001103395	4.79669	1.86871	0.389584	111	39.2771	Yes	No	Yes	No
Cpr47Ef	NM_136816	0	0	NA	0	NA	No	No	No	No
Cpr47Eg	NM_136817	0	0	NA	0	NA	No	No	No	No
Cpr47Ed	NM_136814	0	0	NA	0	NA	No	No	No	No
Cpr47Ee	NM_136815	0.683868	0	0	1	105.073	No	No	No	No
Cpr47Eb	NM_136811	2.97811	2.71221	0.910716	8	115.908	No	No	No	No
Cpr47Ec	NM_136813	0	0	NA	0	NA	No	No	No	No
CG10338	NM_001299127	23.6817	5.13797	0.21696	179	35.2436	Yes	No	Yes	No
CG10339	NM_138037	0	0	NA	0	NA	No	No	No	No
CG10336	NM_136051	84.9679	23.0802	0.271634	392	36.6561	Yes	Yes	Yes	No
CG10337	NM_136142	2.76496	8.0287	2.90373	11	64.6955	No	No	No	No
ph-p	NM_001297874	0.343086	0.33696	0.982144	3	63.9348	No	No	No	No
CG10333	NM_136044	22.6417	19.3465	0.854466	38	38.9119	Yes	Yes	No	No
CkIIbeta	NM_080762	210.52	211.391	1.00414	259	47.9631	Yes	Yes	Yes	No
CG12605	NM_001274458	0	0	NA	1	26.8582	No	No	No	No
Sgs8	NM_057371	0	0	NA	0	NA	No	No	No	No
Sgs7	NM_057370	0	0	NA	0	NA	No	No	No	No
Sgs5	NM_079664	0	0	NA	0	NA	No	No	No	No
Sgs4	NM_057369	0	0	NA	0	NA	No	No	No	No
Sgs3	NM_079300	0	0	NA	0	NA	No	No	No	No
Sgs1	NM_078751	0	0	NA	0	NA	No	No	No	No
hui	NM_166071	0	0	NA	0	NA	No	No	No	No
CG12241	NM_142175	23.4652	8.52943	0.363493	176	29.9335	Yes	Yes	Yes	No
CG1503	NM_001298582	9.58423	6.15472	0.642171	43	27.5651	No	No	No	No
CG8814	NM_134885	47.1947	31.403	0.665394	124	38.6818	Yes	Yes	Yes	No
CG8813	NM_134883	0.100055	0	0	0	NA	No	No	No	No
CG1504	NM_001272814	0	0	NA	0	NA	No	No	No	No
Keap1	NM_142337	3.64938	0.861661	0.236111	15	39.7507	No	No	No	No
Pkcdelta	NM_132569	0.0285872	0	0	0	NA	No	No	No	No
Eip93F	NM_001275888	4.23677	3.05899	0.722009	6	46.5645	Yes	Yes	No	No
RpL18A	NM_079050	2470.58	1494.29	0.604833	5929	56.0662	Yes	Yes	Yes	No
CG8818	NM_136950	31.5682	22.1242	0.700839	256	70.4025	Yes	Yes	Yes	No
CG2316	NM_166736	86.107	10.6681	0.123893	708	33.0724	Yes	Yes	Yes	No
CG7766	NM_001258659	32.2618	2.47121	0.0765987	157	28.1006	Yes	No	Yes	No
Ctr1A	NM_132108	32.1679	82.4371	2.56271	120	46.668	Yes	Yes	Yes	No
CG2310	NM_170411	21.334	3.80965	0.178572	218	21.8128	Yes	No	Yes	No
cv-c	NM_001104316	0.827747	0.460682	0.556549	3	86.7492	No	No	No	No
Tgi	NM_168555	17.422	7.59583	0.435991	215	18.3079	Yes	Yes	Yes	No
ste24b	NM_137330	0.497956	0	0	1	44.1727	No	No	No	No
ste24a	NM_137331	61.3026	116.152	1.89473	360	38.923	Yes	Yes	Yes	No
CG6415	NM_135597	0.0689593	0	0	2	42.9861	No	No	No	No
CG6414	NM_001316636	0	0	NA	0	NA	No	No	No	No
CG7839	NM_140174	53.0318	2.47677	0.0467034	195	39.0908	Yes	No	Yes	No
CG6412	NM_136003	68.0232	41.219	0.605955	400	44.8049	Yes	Yes	Yes	No
CG7834	NM_170428	134.165	356.6	2.65792	1122	94.3196	Yes	Yes	Yes	No
CG7837	NM_143469	29.6095	3.17744	0.107312	170	33.781	Yes	No	Yes	No
CG6418	NM_140156	30.4725	58.857	1.93148	184	51.3858	Yes	Yes	Yes	No
CG10671	NM_168110	31.8015	16.798	0.528215	198	40.8677	Yes	Yes	Yes	No
CHOp24	NM_001297933	108.742	331.424	3.0478	490	51.8584	Yes	Yes	Yes	No
CG5697	NM_142675	0	0	NA	0	NA	No	No	No	No
CG5694	NM_164894	92.3918	33.0666	0.357895	470	35.44	Yes	Yes	Yes	No
Hr38	NM_057771	0.0505456	0	0	0	NA	No	No	No	No
CG5693	NM_144325	0	0	NA	0	NA	No	No	No	No
HIPP1	NM_141004	75.4717	15.5606	0.206177	365	36.4627	Yes	Yes	Yes	No
Rcd5	NM_139595	67.1283	38.2636	0.570007	270	36.1052	Yes	Yes	Yes	No
Rcd4	NM_135377	53.1593	89.4908	1.68344	272	52.8355	Yes	Yes	Yes	No
Rcd7	NM_168803	0	0	NA	0	NA	No	No	No	No
Rcd6	NM_001169746	1.56554	1.08161	0.690888	10	41.1011	No	No	No	No
Rcd1	NM_001274034	52.26	38.7446	0.741381	220	44.1765	Yes	Yes	Yes	No
CG32809	NM_001272208	4.88214	0	0	31	50.269	Yes	No	No	No
Rcd2	NM_140987	0.430719	3.493	8.10971	1	53.4776	No	No	No	No
Sp212	NM_206487	0.0536605	0	0	0	NA	No	No	No	No
CG32806	NM_166904	0	0	NA	0	NA	No	No	No	No
CG32801	NM_166913	0.188629	0	0	0	NA	No	No	No	No
CG32803	NM_001272221	43.4157	7.52616	0.173351	172	40.8983	Yes	No	Yes	No
CheB38a	NM_206014	0	0	NA	0	NA	No	No	No	No
CheB38b	NM_206013	0	0	NA	0	NA	No	No	No	No
CheB38c	NM_136217	0	0	NA	0	NA	No	No	No	No
Chmp1	NM_001300179	52.3109	145.488	2.78122	163	77.7874	Yes	Yes	Yes	No
CG9186	NM_138253	44.4192	65.5478	1.47566	173	48.6156	Yes	Yes	Yes	No
CG18449	NM_136530	0	0	NA	0	NA	No	No	No	No
godzilla	NM_169139	40.4528	17.5747	0.434449	108	63.3425	Yes	Yes	Yes	No
Acox57D-p	NM_079078	39.1355	43.652	1.11541	109	45.9088	Yes	Yes	Yes	No
pxb	NM_001275680	0.865604	1.7343	2.00357	1	39.2889	No	No	No	No
TTLL3B	NM_135224	0	0	NA	0	NA	No	No	No	No
NetA	NM_001298314	0.0377965	1.76699	46.7501	0	NA	No	No	No	No
CG13045	NM_140607	0	2.09308	NA	0	NA	No	No	No	No
CG13044	NM_140610	0	0	NA	0	NA	No	No	No	No
CG13047	NM_140605	0	0	NA	0	NA	No	No	No	No
CG13046	NM_140606	0.974328	4.88035	5.00894	7	60.0662	No	No	No	No
CG13041	NM_140615	0	0	NA	0	NA	No	No	No	No
CG13043	NM_140611	0	0	NA	0	NA	No	No	No	No
CG13042	NM_140613	0	0	NA	0	NA	No	No	No	No
Rpt6R	NM_143554	0	0	NA	0	NA	No	No	No	No
CG13049	NM_168657	0	0	NA	0	NA	No	No	No	No
CG13048	NM_001275006	0	0	NA	0	NA	No	No	No	No
fd102C	NM_143694	0.368203	0	0	3	53.7742	No	No	No	No
Neto	NM_001298282	0	0	NA	0	NA	No	No	No	No
CG30375	NM_165600	0	0	NA	0	NA	No	No	No	No
CG30376	NM_165599	0	0	NA	0	NA	No	No	No	No
CG30377	NM_001299242	51.4826	18.8192	0.365544	169	87.1534	Yes	Yes	Yes	No
Nmd3	NM_057984	32.0903	19.5157	0.608149	219	30.9486	Yes	Yes	Yes	No
CG30371	NM_136526	0	0	NA	0	NA	No	No	No	No
CG30373	NM_001299260	42.4414	91.3335	2.15199	151	50.0016	Yes	Yes	Yes	No
CG30379	NM_165574	0	0	NA	0	NA	No	No	No	No
Socs44A	NM_078935	25.5866	3.02204	0.11811	24	62.3006	Yes	No	No	No
Rim	NM_001260239	0	0	NA	1	47.3497	No	No	No	No
Ric	NM_057863	45.1914	1.08307	0.0239662	190	41.3313	Yes	No	Yes	No
Irk1	NM_001202341	21.2498	3.41972	0.16093	182	50.4344	Yes	No	Yes	No
Irk2	NM_001300556	0	0	NA	0	NA	No	No	No	No
Irk3	NM_001144363	0	0	NA	0	NA	No	No	No	No
Deaf1	NM_001275140	52.3706	1.44001	0.0274965	144	33.3267	Yes	No	Yes	No
CG8673	NM_135338	0.066401	0	0	0	NA	No	No	No	No
CG12576	NM_001272844	56.6091	12.1794	0.215149	497	40.0765	Yes	Yes	Yes	No
CG8671	NM_001299195	38.6193	8.2353	0.213243	312	44.2508	Yes	Yes	Yes	No
CG13309	NM_140005	0	0	NA	0	NA	No	No	No	No
CG8677	NM_001299194	63.395	2.57379	0.0405993	190	31.7175	Yes	Yes	Yes	No
CG8675	NM_132981	49.1874	41.4734	0.843171	117	53.7048	Yes	Yes	Yes	No
CG13300	NM_139786	0.216323	0	0	1	69.9366	No	No	No	No
CG13306	NM_144187	0	0	NA	0	NA	No	No	No	No
CG13305	NM_001144441	0	0	NA	0	NA	No	No	No	No
CG34045	NM_001038872	0	0	NA	0	NA	No	No	No	No
CG40635	NM_001110696	0	0	NA	0	NA	No	No	No	No
Ate1	NM_001274172	47.0796	16.8101	0.357057	378	42.6463	Yes	Yes	Yes	No
CG43677	NM_001274180	0	0	NA	0	NA	No	No	No	No
Aats-thr	NM_001298939	87.7398	209.383	2.38641	189	63.6045	Yes	Yes	Yes	No
CG43851	NM_001273019	0	0	NA	0	NA	No	No	No	No
wts	NM_170524	38.4484	14.732	0.383162	273	58.039	Yes	Yes	Yes	No
CG31777	NM_164550	2.87659	0	0	2	28.2151	No	No	No	No
CG31776	NM_164538	0	0	NA	0	NA	No	No	No	No
CG5991	NM_142951	62.3068	82.1018	1.3177	286	58.7414	Yes	Yes	Yes	No
CG31778	NM_164549	0	0	NA	0	NA	No	No	No	No
CG43679	NM_001274926	0	0	NA	0	NA	No	No	No	No
CG43678	NM_001274925	0	0	NA	0	NA	No	No	No	No
CG4022	NM_001259768	34.854	0.521917	0.0149744	265	36.6184	Yes	No	Yes	No
CG4020	NM_001272335	4.20964	1.87429	0.445239	5	112.059	No	No	No	No
CG4021	NM_137766	0.354041	0.295562	0.834823	0	NA	No	No	No	No
CG4025	NM_130623	8.74216	19.4617	2.22619	56	51.0309	No	Yes	No	No
CG42671	NM_001300099	22.9844	1.54533	0.0672341	202	43.1857	Yes	No	Yes	No
CG42672	NM_137730	14.5453	4.24995	0.292188	100	46.8874	Yes	Yes	Yes	No
CG42673	NM_168353	0.151115	0.302771	2.00357	5	77.7379	No	No	No	No
CG42674	NM_140925	8.5505	0.544897	0.0637269	2	63.981	Yes	No	No	No
CG42675	NM_001202252	0.0730893	0.7322	10.0179	0	NA	No	No	No	No
CG42676	NM_001299976	16.0567	4.14122	0.257913	99	58.0294	Yes	No	No	No
Nop56	NM_142783	144.432	23.7044	0.164122	554	25.4325	Yes	Yes	Yes	No
Cdk12	NM_141068	68.4769	6.6769	0.0975059	319	28.5695	Yes	Yes	Yes	No
pita	NM_166607	57.8664	3.69047	0.0637756	463	29.0124	Yes	No	Yes	No
Prestin	NM_140767	43.4696	10.6153	0.2442	205	42.5518	Yes	Yes	Yes	No
Vha14-1	NM_057621	163.567	451.027	2.75744	663	55.8633	Yes	Yes	Yes	No
Vha14-2	NM_001260015	0	0	NA	0	NA	No	No	No	No
Prp18	NM_142519	26.4894	4.97565	0.187835	107	31.6101	Yes	No	Yes	No
Prp19	NM_079059	72.3144	45.2544	0.6258	302	42.1983	Yes	Yes	Yes	No
LManIII	NM_001298833	0	0	NA	0	NA	No	No	No	No
CG3698	NM_141000	0	0	NA	0	NA	No	No	No	No
CG3699	NM_130519	0.114086	0.76193	6.67858	1	50.2992	No	No	No	No
CG14540	NM_143194	0	0	NA	0	NA	No	No	No	No
CG14543	NM_143201	53.4468	37.9945	0.710886	274	37.6781	Yes	Yes	Yes	No
CG3690	NM_001297835	0	0	NA	0	NA	No	No	No	No
CG14096	NM_140856	0	0	NA	0	NA	No	No	No	No
CG14095	NM_140855	0	0	NA	0	NA	No	No	No	No
CG14546	NM_143191	0	0	NA	0	NA	No	No	No	No
CG10659	NM_136174	0	0	NA	0	NA	No	No	No	No
CG18467	NM_137367	0	0	NA	0	NA	No	No	No	No
CG10651	NM_001299166	0.0893945	0	0	0	NA	No	No	No	No
CG10650	NM_001299152	0.39354	1.75219	4.45239	1	43.5042	No	No	No	No
CG10654	NM_001274838	1.55805	0	0	5	67.0955	No	No	No	No
CG10657	NM_140322	0	0	NA	0	NA	No	No	No	No
CG18469	NM_137357	0	0	NA	0	NA	No	No	No	No
Pk34A	NM_135759	0	0	NA	0	NA	No	No	No	No
fru	NM_001275783	0.278915	0.206973	0.742065	0	NA	No	No	No	No
fry	NM_001259770	7.55677	8.74277	1.15695	42	63.5738	Yes	Yes	No	No
CG12877	NM_001038984	46.4108	1.7465	0.0376314	115	41.1557	Yes	No	Yes	No
Calr	NM_001275501	357.326	509.442	1.42571	2534	29.7651	Yes	Yes	Yes	No
Lrt	NM_001299711	0.065939	0	0	0	NA	No	No	No	No
CG14893	NM_142311	0	0	NA	0	NA	No	No	No	No
CG14892	NM_142305	0	0	NA	0	NA	No	No	No	No
CG14327	NM_001300448	0.390992	2.61127	6.67858	3	27.7781	No	No	No	No
CG14326	NM_142382	0	0	NA	0	NA	No	No	No	No
CG14321	NM_142393	0	0	NA	0	NA	No	No	No	No
CG14323	NM_169767	0	0	NA	0	NA	No	No	No	No
CG14322	NM_001300450	19.689	1.14843	0.0583282	195	46.3871	Yes	No	Yes	No
lectin-22C	NM_001144294	0	0	NA	0	NA	No	No	No	No
CG14329	NM_142379	0	0	NA	0	NA	No	No	No	No
Sulf1	NM_001275697	20.0933	7.01993	0.349366	127	56.0331	Yes	Yes	Yes	No
CG5205	NM_142215	8.60941	3.68157	0.427621	68	43.8246	Yes	Yes	No	No
stwl	NM_001274910	20.1887	0.175562	0.00869607	115	30.0907	Yes	No	Yes	No
heph	NM_001170322	68.1493	98.4817	1.44509	273	53.1757	Yes	Yes	Yes	No
spin	NM_080084	42.0859	76.1789	1.81008	378	38.9662	Yes	Yes	Yes	No
CG7220	NM_001299364	89.3227	92.0537	1.03057	552	55.1763	Yes	Yes	Yes	No
CG7222	NM_136769	73.4543	20.3615	0.2772	360	32.4274	Yes	Yes	Yes	No
CG7227	NM_001298804	0.213787	0	0	0	NA	No	No	No	No
CG34245	NM_001202178	0	0	NA	0	NA	No	No	No	No
Cyp317a1	NM_001299507	0.534469	0.356949	0.667858	0	NA	No	No	No	No
CG14877	NM_142250	0	0	NA	0	NA	No	No	No	No
Tsp96F	NM_001276048	33.4094	3.55299	0.106347	192	45.1517	Yes	No	Yes	No
Ku80	NM_135923	16.3446	31.2258	1.91046	59	51.3532	Yes	Yes	No	No
CG4440	NM_001273568	0.847836	0	0	0	NA	No	No	No	No
Ppn	NM_176575	0.00931473	0.0933137	10.0179	1	46.5868	No	No	No	No
CG13228	NM_136801	0.674953	0	0	0	NA	No	No	No	No
Ahcy89E	NM_206499	1.70435	4.77337	2.8007	12	59.9457	No	No	No	No
RpL35	NM_167043	2450.6	1695.63	0.691922	8291	58.8621	Yes	Yes	Yes	No
mms4	NM_136767	30.2957	49.819	1.64442	97	35.3779	Yes	Yes	No	No
CG32024	NM_168296	0	0	NA	0	NA	No	No	No	No
CG32022	NM_001300058	32.747	30.3755	0.927581	78	35.6196	Yes	Yes	No	No
CG32023	NM_168295	0	0	NA	0	NA	No	No	No	No
CG7593	NM_143458	76.0777	115.956	1.52418	423	46.0493	Yes	Yes	Yes	No
CG2070	NM_001273857	0	0	NA	0	NA	No	No	No	No
Khc-73	NM_001274070	24.7436	5.30626	0.21445	264	28.7548	Yes	Yes	Yes	No
Cad87A	NM_169440	37.1617	339.702	9.14119	282	36.7161	Yes	Yes	Yes	No
Or13a	NM_078635	0	0	NA	0	NA	No	No	No	No
HBS1	NM_001299977	29.9939	30.5544	1.01869	147	51.901	Yes	Yes	Yes	No
CG15056	NM_133063	0	0	NA	0	NA	No	No	No	No
topi	NM_141688	0.470823	0	0	0	NA	No	No	No	No
CG15059	NM_167611	0	0	NA	0	NA	No	No	No	No
CG11210	NM_136507	25.6458	26.6191	1.03795	194	28.9552	Yes	Yes	Yes	No
CG11211	NM_136364	0	0	NA	0	NA	No	No	No	No
GABA-B-R2	NM_001300527	0.199972	0	0	0	NA	No	No	No	No
GABA-B-R3	NM_164387	0.0416466	0	0	0	NA	No	No	No	No
CG5783	NM_136025	0.0989489	0	0	0	NA	No	No	No	No
cindr	NM_001276200	41.5489	24.9002	0.5993	179	44.9267	Yes	Yes	Yes	No
CG9331	NM_001299178	27.1308	58.6825	2.16295	40	48.0237	Yes	Yes	No	No
CG9330	NM_140872	59.72	43.1219	0.722068	123	45.1778	Yes	Yes	Yes	No
CG12499	NM_142787	19.2361	15.3567	0.798328	69	62.8804	Yes	Yes	No	No
l(2)03659	NM_136638	4.09146	0.0660028	0.0161318	22	39.4779	Yes	No	No	No
CG6178	NM_142964	74.0399	180.891	2.44316	231	68.7728	Yes	Yes	Yes	No
CG9336	NM_136225	12.3758	40.6491	3.28455	110	69.0024	No	Yes	Yes	No
CG9338	NM_001273717	0.81771	1.36529	1.66965	5	46.0298	No	No	No	No
CG6175	NM_001274779	37.4095	2.43037	0.0649668	225	46.8446	Yes	No	Yes	No
CG12490	NM_137878	0	0	NA	0	NA	No	No	No	No
CG12493	NM_139670	0	0	NA	2	35.7878	No	No	No	No
CG6171	NM_142198	44.8165	4.70944	0.105083	48	32.9931	Yes	No	No	No
Daxx	NM_135191	53.62	2.18224	0.0406982	514	45.8201	Yes	Yes	Yes	No
CG16798	NM_136186	0.0492325	0.164402	3.33929	0	NA	No	No	No	No
CG16799	NM_001299712	0.328753	0	0	1	30.7903	No	No	No	No
CG8319	NM_141663	39.8337	1.70847	0.04289	105	40.1207	Yes	No	Yes	No
CG16978	NM_144312	0	0	NA	0	NA	No	No	No	No
CG16979	NM_140522	26.7876	47.9097	1.7885	122	51.5679	Yes	Yes	Yes	No
CG8314	NM_137226	40.0786	2.90944	0.0725933	112	42.0468	Yes	No	Yes	No
CG16790	NM_141654	15.6214	28.8569	1.84727	76	45.3867	Yes	Yes	No	No
CG16791	NM_142710	1.10604	0.984906	0.890478	1	104.296	No	No	No	No
CG16972	NM_135768	18.5713	1.9049	0.102572	118	38.6758	Yes	No	Yes	No
CG8311	NM_137295	37.3523	5.33507	0.142831	182	33.9915	Yes	No	Yes	No
CG8312	NM_141661	21.7543	11.176	0.513737	146	48.2171	Yes	Yes	Yes	No
Vps39	NM_142445	20.2843	24.3847	1.20214	112	46.3342	Yes	Yes	Yes	No
ImpL3	NM_001274545	1.18822	3.6844	3.10077	4	52.4395	No	No	No	No
Cnot4	NM_001273414	87.0875	87.0547	0.999623	326	42.5039	Yes	Yes	Yes	No
Sox100B	NM_143582	0	0	NA	0	NA	No	No	No	No
CG31100	NM_169249	0	0	NA	0	NA	No	No	No	No
ham	NM_001273614	0	0	NA	0	NA	No	No	No	No
Drs	NM_079177	0	0	NA	0	NA	No	No	No	No
Uvrag	NM_135788	17.7584	4.48049	0.252302	100	50.8785	Yes	No	Yes	No
Ent3	NM_001300123	0.0411571	0	0	0	NA	No	No	No	No
haf	NM_001272946	0.055567	0	0	0	NA	No	No	No	No
bnk	NM_079865	0	0	NA	0	NA	No	No	No	No
E(spl)mgamma-HLH	NM_079780	0	0	NA	0	NA	No	No	No	No
CG31103	NM_001104444	0	0	NA	0	NA	No	No	No	No
bnl	NM_001144611	0.32463	0	0	0	NA	No	No	No	No
bnb	NM_167634	6.99017	27.548	3.94097	59	82.1432	No	Yes	No	No
CG6310	NM_140172	1.21119	1.5167	1.25223	1	17.1152	No	No	No	No
east	NM_001258556	84.1914	2.85186	0.0338736	622	35.8147	Yes	Yes	Yes	No
Spase22-23	NM_001260350	103.228	452.843	4.38681	422	76.0124	Yes	Yes	Yes	No
CG1339	NM_136463	0.066401	0	0	1	96.4009	No	No	No	No
Lgr4	NM_001103496	0	0	NA	0	NA	No	No	No	No
Lgr1	NM_169777	0.0987871	0	0	0	NA	No	No	No	No
Lgr3	NM_170236	0	0	NA	0	NA	No	No	No	No
MESK2	NM_206192	36.9543	82.7132	2.23826	0	NA	Yes	Yes	No	No
calypso	NM_137252	24.7058	5.71001	0.23112	126	34.9276	Yes	No	Yes	No
CG3909	NM_141712	54.4058	93.8237	1.72452	206	46.3624	Yes	Yes	Yes	No
Nup98-96	NM_142930	55.786	106.745	1.91348	146	56.4449	Yes	Yes	Yes	No
CG17778	NM_001297812	0	0	NA	0	NA	No	No	No	No
CG17777	NM_001297879	0.284609	0	0	0	NA	No	No	No	No
CG17776	NM_001297878	116.616	84.1535	0.721626	622	61.7941	Yes	Yes	Yes	No
St4	NM_001299469	80.7883	157.686	1.95184	129	40.7606	Yes	Yes	Yes	No
CG32006	NM_166734	0	0	NA	0	NA	No	No	No	No
GstD7	NM_080375	0.257742	0	0	0	NA	No	No	No	No
GstD6	NM_080176	0.404069	0	0	0	NA	No	No	No	No
GstD5	NM_080175	0.268035	0	0	0	NA	No	No	No	No
GstD4	NM_080174	0.269379	0	0	0	NA	No	No	No	No
Cpsf100	NM_143401	29.4834	21.6768	0.735219	95	44.998	Yes	Yes	No	No
GstD2	NM_080173	2.15503	0	0	6	80.7849	No	No	No	No
GstD1	NM_001038953	1047.22	2830.12	2.70252	1798	69.8526	Yes	Yes	Yes	No
CG32000	NM_001103379	43.6204	14.3038	0.327915	125	64.9663	Yes	Yes	Yes	No
Atac2	NM_136045	10.6921	0.354674	0.0331718	89	27.743	Yes	No	No	No
Atac3	NM_167828	20.172	5.44003	0.269681	142	29.5919	Yes	No	Yes	No
Acp98AB	NM_001276097	0	0	NA	0	NA	No	No	No	No
GstD9	NM_001300374	20.9654	48.2978	2.30369	43	48.2028	Yes	Yes	No	No
GstD8	NM_080177	0	0	NA	0	NA	No	No	No	No
Gs1	NM_164367	175.587	320.649	1.82615	817	49.1868	Yes	Yes	Yes	No
RASSF8	NM_143154	59.6592	12.8871	0.216012	40	51.0217	Yes	Yes	No	No
Gs2	NM_001298194	1.97562	7.86585	3.98146	3	81.6139	No	No	No	No
NHP2	NM_001274920	118.677	292.565	2.46521	370	35.7666	Yes	Yes	Yes	No
MP1	NM_001316492	2.37512	6.53158	2.75	30	57.2114	No	No	No	No
CG42685	NM_135873	0.0170104	0	0	0	NA	No	No	No	No
CG17514	NM_001015316	75.9847	12.6542	0.166536	798	41.9272	Yes	Yes	Yes	No
ade5	NM_001272564	25.5242	8.26235	0.323707	225	26.1824	Yes	Yes	Yes	No
for	NM_058139	60.7401	18.8114	0.309703	542	55.2462	Yes	Yes	Yes	No
ade3	NM_001298769	32.001	19.6425	0.613809	175	24.5259	Yes	Yes	Yes	No
CG9806	NM_132415	0	0	NA	0	NA	No	No	No	No
CG9804	NM_141215	23.364	7.80193	0.333929	147	24.2064	Yes	No	Yes	No
Ugt86Dc	NM_144368	0.159389	0	0	1	65.114	No	No	No	No
CG9801	NM_141570	10.4553	8.40504	0.803903	60	49.237	Yes	Yes	No	No
soti	NM_142101	0	0	NA	0	NA	No	No	No	No
CG32457	NM_168982	0	0	NA	0	NA	No	No	No	No
fog	NM_001272855	33.4506	95.7618	2.86279	104	71.5733	Yes	Yes	Yes	No
Ef1gamma	NM_001202379	953.863	718.813	0.753581	4552	70.1816	Yes	Yes	Yes	No
CG42688	NM_001273635	0.781985	0	0	0	NA	No	No	No	No
fon	NM_136115	0.0478292	1.11801	23.375	1	136.329	No	No	No	No
CG5913	NM_143182	63.088	38.8613	0.615986	247	39.1887	Yes	Yes	Yes	No
foi	NM_001300056	66.8935	15.8442	0.236857	349	42.3072	Yes	Yes	Yes	No
fok	NM_001201926	231.921	72.7778	0.313805	1075	30.1525	Yes	Yes	Yes	No
Mitofilin	NM_079720	50.5166	53.7923	1.06484	134	56.1271	Yes	Yes	Yes	No
CG9759	NM_001300386	0	0	NA	0	NA	No	No	No	No
CG32452	NM_001300219	41.1618	2.40861	0.0585156	157	43.7082	Yes	No	Yes	No
CG6495	NM_135607	0.488642	2.58355	5.28721	2	24.9724	No	No	No	No
Gsc	NM_001144290	0	0	NA	0	NA	No	No	No	No
CG18628	NM_140144	0	0	NA	0	NA	No	No	No	No
CG9990	NM_170376	34.6651	253.064	7.30024	356	44.4362	Yes	Yes	Yes	No
CG32450	NM_168953	0	0	NA	0	NA	No	No	No	No
Ugt86Dj	NM_144362	0	0	NA	0	NA	No	No	No	No
CG7025	NM_135289	0	0	NA	0	NA	No	No	No	No
RpL23A	NM_079162	1602.26	686.812	0.428652	11077	46.5118	Yes	Yes	Yes	No
Wnt2	NM_057462	0	0	NA	0	NA	No	No	No	No
Wnt6	NM_135264	0	0	NA	1	21.0357	No	No	No	No
Wnt5	NM_001298478	13.6369	5.71486	0.419074	56	46.4862	Yes	Yes	No	No
Wnt4	NM_057624	0	0	NA	0	NA	No	No	No	No
ldbr	NM_206300	17.7146	3.28634	0.185516	38	24.7496	Yes	No	No	No
CG34248	NM_001104149	0	0	NA	0	NA	No	No	No	No
CG43449	NM_001260110	0	0	NA	0	NA	No	No	No	No
CG43112	NM_001259333	0	0	NA	0	NA	No	No	No	No
CG43445	NM_001260245	0	0	NA	0	NA	No	No	No	No
CG43110	NM_001299603	0	0	NA	0	NA	No	No	No	No
CG34247	NM_001104147	0	0	NA	0	NA	No	No	No	No
CG43116	NM_001260379	0	0	NA	0	NA	No	No	No	No
CG34241	NM_001104121	0	0	NA	0	NA	No	No	No	No
CG34242	NM_001104125	19.6605	36.0027	1.83122	77	42.7164	No	No	No	No
CG43115	NM_001258613	0	0	NA	0	NA	No	No	No	No
CG42249	NM_001272509	0.0495049	0	0	0	NA	No	No	No	No
mbm	NM_134667	61.4087	23.8125	0.387771	257	49.0444	Yes	Yes	Yes	No
mbo	NM_079606	34.2676	50.9446	1.48667	188	55.248	Yes	Yes	Yes	No
Sod2	NM_001299574	195.36	479.143	2.45261	522	87.3551	Yes	Yes	Yes	No
Sod3	NM_001316415	338.417	1680.47	4.96567	1563	59.5679	Yes	Yes	Yes	No
sog	NM_001272649	0.577756	0.526171	0.910716	1	8.55549	No	No	No	No
CG42792	NM_001299037	0	0	NA	0	NA	No	No	No	No
CG42790	NM_001276064	0	0	NA	0	NA	No	No	No	No
CG42797	NM_001201643	29.0738	2.6756	0.0920277	194	45.2952	Yes	Yes	Yes	No
sol	NM_057390	45.3158	3.91939	0.0864907	216	57.5464	Yes	Yes	Yes	No
CG42795	NM_141731	0	0	NA	0	NA	No	No	No	No
mbc	NM_001260338	24.4315	9.31487	0.381265	236	46.6289	Yes	Yes	Yes	No
CG44838	NM_001300078	48.6175	4.41463	0.0908033	0	NA	Yes	Yes	No	No
Mp20	NM_057295	0	3.19558	NA	2	59.1287	No	No	No	No
unc-13-4A	NM_001274575	0	0	NA	0	NA	No	No	No	No
mbt	NM_078651	70.8102	5.32169	0.0751544	286	43.6021	Yes	No	Yes	No
Pms2	NM_057675	44.2842	12.4839	0.281903	277	38.8673	Yes	Yes	Yes	No
CG44836	NM_168665	0	0	NA	0	NA	No	No	No	No
snRNP-U1-C	NM_142510	37.7811	17.33	0.458694	321	28.8512	Yes	No	Yes	No
tamo	NM_166664	30.1354	4.01606	0.133267	223	45.6895	Yes	No	Yes	No
CG5521	NM_001170277	16.2053	12.1481	0.749637	36	80.9776	Yes	Yes	No	No
CG5522	NM_166195	40.7221	3.52693	0.0866099	174	45.9782	Yes	No	Yes	No
CG5525	NM_135735	185.948	442.781	2.38121	387	73.9536	Yes	Yes	Yes	No
Hand	NM_135526	0	0	NA	0	NA	No	No	No	No
Tpr2	NM_001273572	118.444	178.276	1.50514	504	43.6609	Yes	Yes	Yes	No
alphaSnap	NM_079456	89.8716	190.447	2.1191	406	57.0502	Yes	Yes	Yes	No
HisCl1	NM_169429	0	0	NA	0	NA	No	No	No	No
az2	NM_136445	24.6005	2.32934	0.0946869	146	40.0317	Yes	No	Yes	No
Axud1	NM_001272999	35.8261	3.96635	0.110711	228	35.0915	Yes	No	Yes	No
Drip	NM_165833	4.09746	7.03678	1.71735	1	134.248	No	No	No	No
Grasp65	NM_140903	44.7738	83.7351	1.87018	308	34.5727	Yes	Yes	Yes	No
Prx6005	NM_078739	51.0071	99.5026	1.95076	133	50.9928	Yes	Yes	Yes	No
Cpr73D	NM_001316452	0	0	NA	0	NA	No	No	No	No
CG6950	NM_169437	57.1167	81.3283	1.4239	479	67.0277	Yes	Yes	Yes	No
TwdlM	NM_143227	0	0	NA	0	NA	No	No	No	No
TwdlN	NM_170281	0	0	NA	0	NA	No	No	No	No
TwdlO	NM_143230	0	0	NA	0	NA	No	No	No	No
TwdlH	NM_143233	0	0	NA	0	NA	No	No	No	No
TwdlJ	NM_143232	0	0	NA	0	NA	No	No	No	No
TwdlK	NM_143231	0	0	NA	0	NA	No	No	No	No
TwdlD	NM_143235	0	0	NA	3	44.6385	No	No	No	No
TwdlE	NM_135313	0	0	NA	0	NA	No	No	No	No
TwdlF	NM_141186	0	0	NA	0	NA	No	No	No	No
TwdlG	NM_001300226	0	0	NA	0	NA	No	No	No	No
TwdlB	NM_143229	0	0	NA	0	NA	No	No	No	No
TwdlC	NM_143262	0	0	NA	0	NA	No	No	No	No
ND-42	NM_169990	101.47	175.718	1.73174	101	72.039	Yes	Yes	Yes	No
TwdlY	NM_167540	0	0	NA	0	NA	No	No	No	No
TwdlZ	NM_167541	0	0	NA	0	NA	No	No	No	No
CG14153	NM_140147	0	0	NA	0	NA	No	No	No	No
TwdlV	NM_141189	0	0	NA	0	NA	No	No	No	No
TwdlW	NM_142349	0	0	NA	0	NA	No	No	No	No
TwdlP	NM_143228	0	0	NA	0	NA	No	No	No	No
TwdlQ	NM_143239	0	0	NA	0	NA	No	No	No	No
CG14154	NM_168418	0	0	NA	0	NA	No	No	No	No
ND-49	NM_001272135	72.5315	202.563	2.79276	342	71.8696	Yes	Yes	Yes	No
CG15209	NM_132426	2.86198	15.0181	5.24746	14	49.8717	No	No	No	No
CG15208	NM_001298170	0	0	NA	0	NA	No	No	No	No
up	NM_001298285	0.0721078	0.240789	3.33929	0	NA	No	No	No	No
CG15201	NM_132463	0	0	NA	0	NA	No	No	No	No
CG15200	NM_132469	0	0	NA	0	NA	No	No	No	No
CG15203	NM_001298176	0	0	NA	0	NA	No	No	No	No
CG15202	NM_001258689	0	0	NA	2	62.3745	No	No	No	No
CG18324	NM_137091	6.73644	2.4451	0.362966	29	60.2463	No	No	No	No
CG18635	NM_137423	0.169567	0.566234	3.33929	0	NA	No	No	No	No
Gos28	NM_142482	55.351	16.9914	0.306975	182	28.2672	Yes	Yes	Yes	No
Sid	NM_143370	0.0757709	0	0	0	NA	No	No	No	No
AdoR	NM_143515	0	0	NA	0	NA	No	No	No	No
Sin	NM_001170015	20.2505	14.1358	0.698044	103	34.6251	Yes	Yes	Yes	No
CG31908	NM_001298770	63.1371	21.4407	0.339589	270	49.0421	Yes	Yes	Yes	No
CG31909	NM_001169429	0	0	NA	0	NA	No	No	No	No
rols	NM_168487	0.199473	0.475785	2.38521	0	NA	No	No	No	No
CG31904	NM_164768	0	0	NA	0	NA	No	No	No	No
CG3209	NM_001299889	57.0609	70.3358	1.23264	381	53.8474	Yes	Yes	Yes	No
CG31907	NM_001298776	0	0	NA	0	NA	No	No	No	No
eloF	NM_141699	0	0	NA	0	NA	No	No	No	No
Rbp1-like	NM_001201656	16.2482	13.5643	0.834823	454	46.7938	Yes	No	Yes	No
Acyp	NM_001298987	0	0	NA	0	NA	No	No	No	No
CG33051	NM_176344	11.5456	5.50774	0.477042	97	31.5929	No	No	No	No
CG33052	NM_176345	38.1482	13.6289	0.35726	123	39.5787	Yes	Yes	Yes	No
CG33506	NM_001014528	59.7246	80.1287	1.34164	111	59.3389	Yes	Yes	Yes	No
Als2	NM_141090	24.7056	2.43901	0.0987226	104	48.0888	Yes	Yes	Yes	No
CG33509	NM_001014494	0	0	NA	0	NA	No	No	No	No
Dgp-1	NM_137458	26.5057	17.702	0.667858	157	53.1632	Yes	Yes	Yes	No
fd96Ca	NM_001300587	0	0	NA	0	NA	No	No	No	No
CG43084	NM_001259844	0	0	NA	0	NA	No	No	No	No
CG4500	NM_135852	0.0403529	0	0	0	NA	No	No	No	No
Idh	NM_168265	277.238	403.752	1.45633	1061	70.174	Yes	Yes	Yes	No
RacGAP84C	NM_057356	0	0	NA	0	NA	No	No	No	No
Ide	NM_079458	24.1385	44.2595	1.83356	79	60.6981	Yes	Yes	No	No
CG3061	NM_142071	75.3162	155.608	2.06606	368	61.5155	Yes	Yes	Yes	No
CG30010	NM_001273907	17.2088	10.6637	0.619662	92	40.0747	No	No	No	No
CG3065	NM_138017	44.4985	11.6635	0.262111	246	47.8634	Yes	Yes	Yes	No
CG6984	NM_137343	27.7121	13.3149	0.480474	13	48.4904	Yes	Yes	No	No
Pxt	NM_142391	333.244	828.13	2.48505	627	116.635	Yes	Yes	Yes	No
Pxn	NM_206254	0.0355291	0	0	0	NA	No	No	No	No
otk2	NM_138561	6.49759	0.644476	0.0991869	38	30.3695	No	No	No	No
Dsor1	NM_078543	62.9672	86.0393	1.36641	207	68.1961	Yes	Yes	Yes	No
CG43083	NM_001259843	0	0	NA	0	NA	No	No	No	No
Pxd	NM_206501	0	0	NA	0	NA	No	No	No	No
CG12006	NM_139575	59.5221	4.93205	0.0828608	415	35.1335	Yes	No	Yes	No
CG12007	NM_141255	22.4212	13.466	0.600592	89	32.6265	Yes	Yes	No	No
CG12004	NM_001299970	59.0241	76.4376	1.29502	31	52.641	Yes	Yes	No	No
RpII33	NM_058071	51.2461	75.3645	1.47064	190	56.3235	Yes	Yes	Yes	No
CG12003	NM_139368	0	0	NA	0	NA	No	No	No	No
osp	NM_001169504	14.0273	3.00709	0.214374	150	41.0439	Yes	Yes	Yes	No
CG12009	NM_139542	0	0	NA	0	NA	No	No	No	No
eIF2B-alpha	NM_143495	38.469	75.655	1.96665	144	54.3699	Yes	Yes	Yes	No
osk	NM_206464	315.293	3.96406	0.0125726	1236	58.1741	Yes	No	Yes	No
Nf1	NM_001276049	6.57348	4.09963	0.623662	84	53.5439	Yes	Yes	No	No
osa	NM_079668	68.673	25.0004	0.364049	388	36.0824	Yes	Yes	Yes	No
pes	NM_164777	90.9983	86.2737	0.948081	571	58.7564	Yes	Yes	Yes	No
ver	NM_140330	11.1002	2.71221	0.244338	44	45.6401	No	No	No	No
pelo	NM_057634	43.2449	14.6534	0.338848	150	59.6899	Yes	Yes	Yes	No
tef	NM_079042	94.5337	1.55714	0.0164718	377	35.7885	Yes	No	Yes	No
Kal1	NM_142963	1.79222	0.880109	0.491072	7	40.8762	No	No	No	No
CG10352	NM_001272539	0	0	NA	0	NA	No	No	No	No
CG10353	NM_167312	9.61764	6.19319	0.64394	7	92.8071	Yes	Yes	No	No
CG10357	NM_139564	0	0	NA	0	NA	No	No	No	No
CG6785	NM_135694	0.628498	0	0	4	50.3473	No	No	No	No
CG12263	NM_137488	20.0855	26.44	1.31637	55	86.8185	Yes	Yes	No	No
CkIIalpha-i3	NM_001299961	12.1467	0.241437	0.0198767	51	34.3573	Yes	No	No	No
CG12264	NM_135689	46.7386	55.0376	1.17756	169	76.3924	Yes	Yes	Yes	No
CG9471	NM_141686	51.6055	50.46	0.977803	414	44.6972	Yes	Yes	Yes	No
unc79	NM_142538	0	0	NA	0	NA	No	No	No	No
Ubc84D	NM_079536	0	0	NA	0	NA	No	No	No	No
CG12269	NM_001260259	0	0	NA	0	NA	No	No	No	No
CG6788	NM_133026	0.156854	0	0	0	NA	No	No	No	No
CG5326	NM_142803	0.513676	6.17513	12.0214	17	79.6973	No	No	No	No
CG5321	NM_132739	0	0.451277	NA	0	NA	No	No	No	No
mahj	NM_001259522	33.0083	16.0732	0.486943	227	40.0409	Yes	Yes	Yes	No
CG8870	NM_169517	0	0	NA	0	NA	No	No	No	No
CG1529	NM_134577	35.4665	3.53052	0.0995453	111	37.9214	Yes	No	Yes	No
CG8878	NM_206099	45.8818	2.2678	0.049427	228	39.1332	Yes	No	Yes	No
CG1835	NM_134560	3.15088	1.31521	0.417411	0	NA	No	No	No	No
Taz	NM_058084	107.294	102.933	0.959354	634	71.7896	Yes	Yes	Yes	No
CG1523	NM_143378	26.2124	7.99775	0.305113	135	35.2837	Yes	Yes	Yes	No
CG45116	NM_001300218	0	0	NA	0	NA	No	No	No	No
CG2336	NM_169148	0	0	NA	0	NA	No	No	No	No
CG7789	NM_143471	41.0582	91.7124	2.23372	90	65.5665	Yes	Yes	No	No
CG7786	NM_137257	0	0	NA	0	NA	No	No	No	No
Sec61gamma	NM_001298521	329.873	889.114	2.69532	1448	50.2226	Yes	Yes	Yes	No
E(spl)m7-HLH	NM_080505	0.157621	0	0	0	NA	No	No	No	No
Tao	NM_001201743	162.663	5.60701	0.0344701	1092	35.3241	Yes	Yes	Yes	No
CG7781	NM_001298816	0.204427	0	0	0	NA	No	No	No	No
sced	NM_136375	54.4399	2.89086	0.0531019	426	47.4604	Yes	No	Yes	No
Mat89Ba	NM_142273	24.4461	25.2056	1.03107	22	38.9774	Yes	Yes	No	No
CG6439	NM_142743	69.103	89.8224	1.29983	218	47.3676	Yes	Yes	Yes	No
CG6435	NM_137321	0	0	NA	0	NA	No	No	No	No
boca	NM_165541	55.8746	146.756	2.62652	182	39.5355	Yes	Yes	Yes	No
CG6431	NM_135598	0	0	NA	154	35.6423	No	No	Yes	No
CG14196	NM_133139	0	0	NA	0	NA	No	No	No	No
M6	NM_001275237	3.81005	19.3388	5.07572	29	38.4672	No	Yes	No	No
ATPsynepsilonL	NM_001104266	0	0	NA	1	12.4651	No	No	No	No
CG14194	NM_133132	40.6251	1.83323	0.0451256	242	31.2277	Yes	No	Yes	No
CG1789	NM_132276	53.9793	14.1772	0.262641	113	31.9546	Yes	No	Yes	No
CG14195	NM_001298501	0	0	NA	0	NA	No	No	No	No
CG6195	NM_142565	66.2443	94.7301	1.43001	258	53.7847	Yes	Yes	Yes	No
Six4	NM_140999	0.856097	6.19397	7.23513	6	87.5418	No	No	No	No
CG1785	NM_132274	54.819	37.4258	0.682715	211	42.1093	Yes	Yes	Yes	No
melt	NM_001274566	3.73986	8.35626	2.23438	15	78.3438	Yes	Yes	No	No
CG11007	NM_001299688	81.8062	69.8738	0.854137	441	48.058	Yes	Yes	Yes	No
CG17378	NM_135229	0	0	NA	0	NA	No	No	No	No
CG11000	NM_001260007	0.169746	0	0	3	41.8875	No	No	No	No
Mf	NM_001300405	0	0	NA	1	2.55927	No	No	No	No
Rpt4R	NM_001300110	0	0	NA	0	NA	No	No	No	No
CG6847	NM_001298468	0.0545509	1.73053	31.7233	1	32.1029	No	No	No	No
Gr36a	NM_165205	0	0	NA	0	NA	No	No	No	No
Gr36c	NM_165207	0	0	NA	0	NA	No	No	No	No
ATPsyngamma	NM_170425	242.874	488.209	2.01014	789	87.1245	Yes	Yes	Yes	No
CG13407	NM_142752	0	0	NA	0	NA	No	No	No	No
Grip128	NM_132802	42.829	18.325	0.427865	64	54.1063	Yes	Yes	No	No
endos	NM_001274891	249.428	778.253	3.12015	455	112.773	Yes	Yes	Yes	No
Mp	NM_001300031	0.102171	0.113726	1.1131	1	25.0595	No	No	No	No
Ms	NM_001300574	0	0	NA	0	NA	No	No	No	No
Obp83g	NM_169126	0	0	NA	0	NA	No	No	No	No
Obp83a	NM_001300260	0	0	NA	0	NA	No	No	No	No
Obp83b	NM_079518	0.214214	0	0	0	NA	No	No	No	No
RNaseX25	NM_079242	56.5894	70.1386	1.23943	469	37.0814	Yes	Yes	Yes	No
Cby	NM_142732	0	0	NA	0	NA	No	No	No	No
CG4497	NM_001201778	39.752	32.546	0.818724	299	40.3297	Yes	Yes	Yes	No
CG4496	NM_001298779	4.04387	1.58867	0.392858	27	35.7701	No	No	No	No
CG4495	NM_001103640	32.2072	45.9417	1.42644	304	44.8859	Yes	Yes	Yes	No
CG30355	NM_165617	0	0	NA	0	NA	No	No	No	No
eIF-2alpha	NM_001298400	172.807	145.228	0.840404	668	41.385	Yes	Yes	Yes	No
eEF1delta	NM_135517	391.663	1418.3	3.62122	2052	61.1379	Yes	Yes	Yes	No
Cbp80	NM_080011	58.6711	14.5168	0.247427	448	30.6006	Yes	Yes	Yes	No
phtf	NM_136388	34.0132	11.5136	0.338503	166	44.2054	Yes	Yes	Yes	No
Myd88	NM_001273892	27.0885	3.95531	0.146015	134	27.705	Yes	No	Yes	No
Or42b	NM_078900	0	0	NA	0	NA	No	No	No	No
CG17982	NM_001298078	16.5605	11.6257	0.70201	25	32.58	Yes	No	No	No
Or42a	NM_078898	0	0	NA	0	NA	No	No	No	No
thetaTry	NM_078969	0	0	NA	0	NA	No	No	No	No
CG13409	NM_142747	0.0505298	0.168734	3.33929	0	NA	No	No	No	No
PRL-1	NM_001273558	196.756	59.2721	0.301247	447	47.4635	Yes	Yes	Yes	No
Sfp24Bc	NM_001169391	0	0	NA	0	NA	No	No	No	No
SP2353	NM_001299545	0.0199565	0	0	0	NA	No	No	No	No
CG16957	NM_135806	0	0	NA	0	NA	No	No	No	No
Syx8	NM_079389	21.222	25.2799	1.19121	83	43.0839	Yes	Yes	No	No
RpI12	NM_079715	34.7396	42.9651	1.23677	266	32.0688	Yes	Yes	Yes	No
DOR	NM_168084	2.60287	8.93319	3.43205	30	53.7699	No	No	No	No
Syx5	NM_134305	76.7968	58.0035	0.755285	317	44.9099	Yes	Yes	Yes	No
Syx6	NM_206092	52.5024	11.3769	0.216693	413	35.3751	Yes	Yes	Yes	No
Syx7	NM_168906	72.9839	76.4133	1.04699	281	51.4536	Yes	Yes	Yes	No
SWIP	NM_132888	6.82119	4.04391	0.592845	27	31.0283	Yes	Yes	No	No
CG17186	NM_142582	28.7344	0	0	132	28.9832	Yes	No	Yes	No
CG17187	NM_141799	21.0363	6.3285	0.300837	18	27.819	Yes	No	No	No
CG17180	NM_138193	11.9082	17.5341	1.47244	60	33.8509	Yes	Yes	No	No
CG4950	NM_001275005	0	0	NA	0	NA	No	No	No	No
CG10822	NM_137606	0	0	NA	0	NA	No	No	No	No
La	NM_057666	169.194	107.297	0.634168	720	34.0339	Yes	Yes	Yes	No
CG17189	NM_143277	0	0	NA	0	NA	No	No	No	No
Pop2	NM_168484	134.37	204.954	1.5253	147	58.9223	Yes	Yes	Yes	No
CG44335	NM_001300280	0	0	NA	0	NA	No	No	No	No
CanA1	NM_001260449	0	0	NA	0	NA	No	No	No	No
CG34051	NM_001038827	0	0	NA	0	NA	No	No	No	No
Iris	NM_134726	0.416789	2.95753	7.09599	4	49.0822	No	No	No	No
CG6893	NM_140796	0	0	NA	0	NA	No	No	No	No
CG31759	NM_165001	13.318	13.4072	1.0067	108	52.4314	Yes	Yes	Yes	No
CG34054	NM_001038851	0	0	NA	1	24.288	No	No	No	No
CG34057	NM_001038891	0.0791203	0	0	0	NA	No	No	No	No
CG34056	NM_001038890	0	0	NA	0	NA	No	No	No	No
CG43659	NM_001274221	0	0	NA	0	NA	No	No	No	No
CG43658	NM_001272714	20.5363	9.6542	0.470104	62	71.1887	Yes	Yes	No	No
CG31751	NM_165260	9.09804	34.1786	3.7567	18	71.5289	Yes	Yes	No	No
CG31750	NM_165208	0	0	NA	0	NA	No	No	No	No
CG31021	NM_170513	0.122781	0	0	0	NA	No	No	No	No
Lk	NM_080154	0	0	NA	0	NA	No	No	No	No
CG4009	NM_001275726	522.479	1085.33	2.07727	1229	87.2106	Yes	Yes	Yes	No
CG4004	NM_132596	19.4723	0	0	131	41.3766	Yes	No	Yes	No
CG4000	NM_142649	0	0	NA	0	NA	No	No	No	No
CG12934	NM_001299361	0.121302	0	0	2	157.98	No	No	No	No
CG4650	NM_135878	0	0	NA	0	NA	No	No	No	No
CG42658	NM_001201753	0	0	NA	0	NA	No	No	No	No
CG42659	NM_001201906	0	0	NA	0	NA	No	No	No	No
Rim2	NM_001258911	18.744	1.57134	0.0838316	116	40.325	Yes	No	Yes	No
CG17239	NM_001272991	0	0	NA	0	NA	No	No	No	No
CG10516	NM_140562	10.0372	4.12096	0.410569	51	28.7573	No	No	No	No
CG17237	NM_134822	0	0	NA	0	NA	No	No	No	No
CG17234	NM_164470	0	0	NA	0	NA	No	No	No	No
CG42656	NM_001202263	0	0	NA	0	NA	No	No	No	No
CG17233	NM_001259911	58.1699	5.44732	0.0936449	258	27.56	Yes	Yes	Yes	No
CG17230	NM_001300360	17.5361	16.9948	0.969132	29	64.0134	Yes	Yes	No	No
CG42655	NM_001202204	0	0	NA	0	NA	No	No	No	No
Nse4	NM_135561	45.3124	75.1654	1.65883	86	42.0197	Yes	Yes	No	No
Ir93a	NM_142667	0	0	NA	0	NA	No	No	No	No
Nse1	NM_001273216	39.905	38.8318	0.973106	151	28.7709	Yes	Yes	Yes	No
CG14527	NM_143388	0	0	NA	0	NA	No	No	No	No
CG14526	NM_143389	3.8447	11.023	2.86707	11	46.3311	No	Yes	No	No
CG8765	NM_140884	27.9497	2.26018	0.080866	154	42.4513	Yes	No	Yes	No
CG14529	NM_143384	0	0	NA	0	NA	No	No	No	No
CG14528	NM_143386	0	0	NA	0	NA	No	No	No	No
Tusp	NM_001202374	0	0.2532	NA	0	NA	No	No	No	No
CG10631	NM_136154	15.6155	0.119052	0.00762395	112	48.2582	Yes	No	Yes	No
His1:CG33804	NM_001032115	0	0	NA	0	NA	No	No	No	No
CG10635	NM_139704	203.227	588.49	2.89574	610	45.4357	Yes	Yes	Yes	No
CG10639	NM_136079	16.7444	14.2847	0.853104	81	62.7699	Yes	Yes	No	No
CG10638	NM_001300121	62.3685	182.382	2.92426	121	64.4907	Yes	Yes	Yes	No
CG18764	NM_144455	11.6721	2.50727	0.214808	40	32.6332	Yes	No	No	No
CG12857	NM_137143	0	0	NA	0	NA	No	No	No	No
CG12851	NM_001299937	0.252016	0	0	0	NA	No	No	No	No
CG12853	NM_144120	0	0	NA	0	NA	No	No	No	No
CG12858	NM_001259394	0.323761	0.360377	1.1131	3	39.3993	No	No	No	No
nahoda	NM_001259545	2.01539	34.8375	17.2857	20	27.0413	No	Yes	No	No
Obp22a	NM_164447	0	0	NA	0	NA	No	No	No	No
skd	NM_168879	48.2936	8.23386	0.170496	173	56.7837	Yes	Yes	Yes	No
Prosalpha4T1	NM_142653	0	0	NA	0	NA	No	No	No	No
Prosalpha4T2	NM_001299915	1.47684	1.89677	1.28434	0	NA	No	No	No	No
fd64A	NM_001259680	0	0	NA	0	NA	No	No	No	No
CG15461	NM_144034	0	0	NA	0	NA	No	No	No	No
Mhc	NM_165190	0	0.0933731	NA	2	45.1266	No	No	No	No
spok	NM_001110990	0	0	NA	0	NA	No	No	No	No
CG10189	NM_001273656	7.93032	7.3688	0.929194	21	49.7197	No	No	No	No
CG10188	NM_165305	29.0417	2.49552	0.0859289	283	29.09	Yes	No	Yes	No
CG32599	NM_167398	0	0	NA	0	NA	No	No	No	No
CG10185	NM_142264	0	0	NA	0	NA	No	No	No	No
CG32225	NM_168843	0	0	NA	1	78.3349	No	No	No	No
CG10186	NM_001144370	0	0	NA	0	NA	No	No	No	No
CG32221	NM_168820	17.476	3.6608	0.209476	109	21.9633	Yes	No	Yes	No
CG32590	NM_167414	17.4887	5.89357	0.336993	96	28.3133	No	No	No	No
CG32591	NM_001298327	0	0	NA	0	NA	No	No	No	No
dyl	NM_168078	0.0450977	0	0	0	NA	No	No	No	No
CG7208	NM_142426	117.695	95.5711	0.812023	489	35.5378	Yes	Yes	Yes	No
ss	NM_057400	0	0	NA	0	NA	No	No	No	No
sr	NM_001300455	0.0904655	0	0	0	NA	No	No	No	No
CG7201	NM_001274645	0	0	NA	0	NA	No	No	No	No
CG7200	NM_001299102	25.908	1.53317	0.0591773	145	32.9558	Yes	No	Yes	No
wun2	NM_001299319	77.2807	16.7371	0.216575	348	33.1515	Yes	Yes	Yes	No
CG7206	NM_001258799	23.5554	5.07474	0.215438	166	41.3103	No	No	Yes	No
NijC	NM_001104291	0.44623	0	0	2	79.6733	No	No	No	No
st	NM_079384	0.371553	1.51644	4.08136	2	113.754	No	No	No	No
Gpo-1	NM_001103862	4.32097	9.23961	2.13832	19	55.6613	No	Yes	No	No
so	NM_057385	0.134129	0	0	0	NA	No	No	No	No
sn	NM_167143	66.9671	126.262	1.88543	246	59.2075	Yes	Yes	Yes	No
sm	NM_001259500	3.81753	15.2615	3.99774	21	70.3944	No	Yes	No	No
sl	NM_057378	17.2925	5.2896	0.305889	101	68.2834	Yes	Yes	Yes	No
sc	NM_057455	0	0	NA	0	NA	No	No	No	No
sa	NM_141054	0	0	NA	0	NA	No	No	No	No
E(spl)m3-HLH	NM_079785	0.257742	1.29101	5.00894	0	NA	No	No	No	No
se	NM_139978	0.826702	0	0	3	82.6886	No	No	No	No
CG10283	NM_001169535	0.25733	1.59585	6.20154	2	39.4915	No	No	No	No
Snap24	NM_079574	45.4003	56.6234	1.24721	339	36.8196	Yes	Yes	Yes	No
tty	NM_167744	5.51404	0.845495	0.153335	14	33.0387	Yes	No	No	No
Rad23	NM_001272123	311.191	147.422	0.473735	2481	26.8384	Yes	Yes	Yes	No
ttv	NM_001274042	22.2913	0	0	147	48.6473	Yes	No	Yes	No
Ance-4	NM_001299294	0	0	NA	0	NA	No	No	No	No
Ance-5	NM_133164	0.0438456	0	0	0	NA	No	No	No	No
tth	NM_001298287	62.6384	3.69632	0.0590103	273	39.5771	Yes	No	Yes	No
CG15696	NM_142664	0	0	NA	0	NA	No	No	No	No
Ance-2	NM_176028	0.0901953	0	0	0	NA	No	No	No	No
CG15695	NM_142663	0	0	NA	0	NA	No	No	No	No
CG32040	NM_168326	0	0	NA	0	NA	No	No	No	No
KrT95D	NM_079749	25.6825	5.79991	0.225831	187	39.1185	Yes	Yes	Yes	No
CG33276	NM_206296	25.7994	60.9365	2.36194	17	29.8602	No	Yes	No	No
CG11583	NM_001038900	65.8713	50.8419	0.771836	392	40.7315	Yes	Yes	Yes	No
CG11581	NM_001298306	0	0	NA	0	NA	No	No	No	No
CG11586	NM_139624	45.6168	40.2185	0.881661	135	54.0291	Yes	Yes	Yes	No
MFS1	NM_166564	0	0	NA	0	NA	No	No	No	No
CG11584	NM_132713	0.0415392	0	0	0	NA	No	No	No	No
MFS3	NM_134728	0.054093	0	0	0	NA	No	No	No	No
CG11588	NM_001274800	0	0	NA	0	NA	No	No	No	No
jim	NM_143699	6.40884	21.9583	3.42625	53	35.1155	Yes	Yes	No	No
MFS9	NM_169898	0	0	NA	0	NA	No	No	No	No
CG13724	NM_140709	0	0	NA	0	NA	No	No	No	No
CG13725	NM_140710	0	0	NA	0	NA	No	No	No	No
CG13727	NM_140712	0	0	NA	0	NA	No	No	No	No
CG13720	NM_139656	0	0	NA	0	NA	No	No	No	No
CG13721	NM_139655	0	0	NA	0	NA	No	No	No	No
CG13722	NM_139654	0	0	NA	0	NA	No	No	No	No
CG13723	NM_140707	0	0	NA	2	93.188	No	No	No	No
Srp19	NM_057787	93.3795	168.334	1.80269	374	47.4923	Yes	Yes	Yes	No
CG13728	NM_140717	0	0	NA	0	NA	No	No	No	No
djl	NM_141429	0	0	NA	0	NA	No	No	No	No
CNT1	NM_136603	0	0	NA	0	NA	No	No	No	No
Dnz1	NM_058101	41.3551	15.4971	0.374733	257	39.2521	Yes	Yes	Yes	No
CCDC151	NM_140263	0	0	NA	0	NA	No	No	No	No
CG15073	NM_137518	9.89559	3.3362	0.33714	43	32.977	Yes	No	No	No
MTF-1	NM_001104090	15.3444	1.99164	0.129796	106	40.2115	Yes	No	Yes	No
CG2224	NM_001276179	15.073	10.8649	0.720816	101	40.8755	Yes	Yes	Yes	No
nonA-l	NM_001275717	35.0934	0.145937	0.00415852	350	23.681	Yes	No	Yes	No
Glycogenin	NM_001259517	30.0774	25.4057	0.844677	190	45.013	Yes	Yes	Yes	No
CG9319	NM_001273709	21.7891	14.3011	0.656343	87	53.5135	Yes	Yes	No	No
CG9649	NM_142086	0	0	NA	0	NA	No	No	No	No
CG9313	NM_001299727	0	0	NA	0	NA	No	No	No	No
CG9312	NM_142056	0	0	NA	0	NA	No	No	No	No
Obp59a	NM_176249	0	0	NA	0	NA	No	No	No	No
CG9646	NM_137339	27.4527	1.84783	0.0673093	147	51.9426	Yes	No	Yes	No
CG9317	NM_136208	0	0	NA	0	NA	No	No	No	No
CG9640	NM_001274110	0.170525	0	0	2	141.686	No	No	No	No
CG9643	NM_001298643	38.1596	37.4782	0.982144	201	43.4425	Yes	Yes	Yes	No
CG9314	NM_001273339	0	0	NA	0	NA	No	No	No	No
cbs	NM_137031	38.9644	3.01188	0.0772984	253	30.5543	Yes	No	Yes	No
bonsai	NM_137847	108.171	150.591	1.39216	269	47.7168	Yes	Yes	Yes	No
Sec71	NM_135831	18.7423	21.5739	1.15108	93	35.3884	Yes	Yes	No	No
ND-B14	NM_001273948	116.727	179.583	1.53848	396	64.1404	Yes	Yes	Yes	No
mRpL11	NM_079627	55.5325	96.4482	1.73679	189	49.7985	Yes	Yes	Yes	No
CG8993	NM_139459	63.543	66.7081	1.04981	415	33.4746	Yes	Yes	Yes	No
intr	NM_143376	0	0	NA	0	NA	No	No	No	No
CG8997	NM_001298983	0	0	NA	0	NA	No	No	No	No
su(r)	NM_167182	0.237984	0.353199	1.48413	1	-7.72748	No	No	No	No
Dll	NM_079133	0	0	NA	0	NA	No	No	No	No
CG13562	NM_138005	1.88987	0.901546	0.477042	5	43.1008	No	No	No	No
blanks	NM_139709	0	0	NA	0	NA	No	No	No	No
AdamTS-A	NM_206496	1.23618	2.51967	2.03827	11	74.6923	No	Yes	No	No
CycD	NM_167473	109.003	6.80177	0.0624	708	35.3319	Yes	No	Yes	No
GCS2beta	NM_136000	66.0192	307.192	4.65307	244	78.6379	Yes	Yes	Yes	No
CG31191	NM_001104380	0	0	NA	0	NA	No	No	No	No
CG7804	NM_001274945	0.355212	0	0	0	NA	No	No	No	No
CG6337	NM_001299466	0	0	NA	0	NA	No	No	No	No
CG6330	NM_143258	23.9851	45.9994	1.91784	77	56.3618	Yes	Yes	No	No
CG6332	NM_142742	0	0	NA	0	NA	No	No	No	No
CG6333	NM_001169988	0	0	NA	0	NA	No	No	No	No
nst	NM_140331	41.7824	12.2714	0.293697	252	36.2749	Yes	Yes	Yes	No
blw	NM_166554	414.085	1046.76	2.52788	2707	84.626	Yes	Yes	Yes	No
CG6401	NM_001299618	17.7314	10.0619	0.567461	46	52.7543	Yes	Yes	No	No
blp	NM_001300420	44.3423	43.6347	0.984042	208	35.3556	Yes	Yes	Yes	No
Su(P)	NM_079392	65.827	68.3573	1.03844	359	50.2177	Yes	Yes	Yes	No
Mob4	NM_001259222	98.5843	33.5141	0.339954	432	38.6494	Yes	Yes	Yes	No
Muc26B	NM_144295	0.0589637	0	0	0	NA	No	No	No	No
CG31446	NM_001275681	0	0	NA	0	NA	No	No	No	No
CG4797	NM_166625	0.0518972	0.1733	3.33929	1	96.0193	No	No	No	No
Prx3	NM_079663	121.862	278.816	2.28797	297	60.7535	Yes	Yes	Yes	No
CG4793	NM_165139	0	0.400986	NA	0	NA	No	No	No	No
CheB53b	NM_001014531	0	0	NA	0	NA	No	No	No	No
CheB53a	NM_001014530	0.127646	0	0	0	NA	No	No	No	No
CG17751	NM_142559	0	0	NA	0	NA	No	No	No	No
CG8483	NM_142007	0	0	NA	0	NA	No	No	No	No
CG17754	NM_001298117	18.6821	6.0325	0.322903	95	34.9882	Yes	Yes	No	No
l(1)G0045	NM_132008	17.1683	6.9265	0.403446	110	37.8092	Yes	Yes	Yes	No
flfl	NM_142047	71.4299	10.676	0.149462	257	28.7925	Yes	Yes	Yes	No
Mes-4	NM_170360	96.524	10.418	0.107931	794	37.4439	Yes	Yes	Yes	No
RpL9	NM_001298897	1897.49	995.105	0.524432	4612	66.6912	Yes	Yes	Yes	No
CG11999	NM_141270	68.0808	91.7422	1.34755	232	33.2878	Yes	Yes	Yes	No
CG5660	NM_001300059	10.7301	5.40672	0.503883	85	32.5034	Yes	Yes	No	No
eIF-5A	NM_138034	2651.41	2592.04	0.977607	20229	59.3828	Yes	Yes	Yes	No
Nup214	NM_143782	40.7156	74.7761	1.83655	178	45.3746	Yes	Yes	Yes	No
Wnt10	NM_135265	0	0	NA	0	NA	No	No	No	No
phr6-4	NM_057840	58.3729	2.73578	0.0468672	479	33.5838	Yes	No	Yes	No
BG642167	NM_001043293	0	0	NA	0	NA	No	No	No	No
Ptp4E	NM_001169198	25.4173	12.9515	0.509554	211	34.0711	Yes	Yes	Yes	No
lectin-21Cb	NM_134695	0	0	NA	0	NA	No	No	No	No
lectin-21Ca	NM_144385	0	0	NA	0	NA	No	No	No	No
CG13658	NM_143117	0.0660742	0.220641	3.33929	0	NA	No	No	No	No
Amun	NM_167299	190.734	75.336	0.394979	937	39.788	Yes	Yes	Yes	No
TrpA1	NM_001274671	0	0.147416	NA	0	NA	No	No	No	No
2016-09-02	NM_001275835	86.0024	80.9748	0.941541	453	31.144	Yes	Yes	Yes	No
2016-09-04	NM_167532	22.5838	0.435918	0.0193023	104	23.6609	Yes	No	Yes	No
2016-09-05	NM_143704	20.5491	13.0178	0.633499	90	37.9662	Yes	Yes	No	No
Rrp47	NM_001298381	66.496	123.222	1.85307	288	50.5549	Yes	Yes	Yes	No
Hmx	NM_001300447	0	0	NA	0	NA	No	No	No	No
CG5150	NM_001300015	0	0	NA	1	75.1276	No	No	No	No
robl62A	NM_138266	0	0	NA	4	41.6639	No	No	No	No
CG9861	NM_137934	0	0	NA	0	NA	No	No	No	No
Hmu	NM_057811	86.7402	138.141	1.59259	1015	43.999	Yes	Yes	Yes	No
CG9863	NM_137936	0	0	NA	0	NA	No	No	No	No
CG9864	NM_001274171	61.3643	211.498	3.44659	308	73.4369	Yes	Yes	Yes	No
Hmr	NM_132409	22.1728	1.66818	0.0752353	219	33.8528	Yes	No	Yes	No
Bug22	NM_135558	48.1802	21.5169	0.446592	170	50.4132	Yes	Yes	Yes	No
Hml	NM_079336	0	0.210821	NA	0	NA	No	No	No	No
CG1647	NM_143379	21.1877	1.11479	0.0526149	79	39.0116	Yes	No	No	No
CG1646	NM_001104488	19.9148	31.7729	1.59544	50	54.8798	Yes	Yes	No	No
CG1317	NM_139458	21.0956	19.0864	0.904756	191	32.1424	Yes	Yes	Yes	No
CG1640	NM_167369	111.8	125.797	1.1252	465	45.5129	Yes	Yes	Yes	No
CG1315	NM_001275395	0	0	NA	0	NA	No	No	No	No
CG8195	NM_137205	27.1992	2.27583	0.0836724	133	47.6146	Yes	No	Yes	No
CG8199	NM_141648	26.9538	7.20054	0.267143	118	23.1239	Yes	No	Yes	No
CG1648	NM_001299324	0.626317	9.20241	14.6929	9	60.5659	No	No	No	No
vfl	NM_001258840	81.395	25.0995	0.308367	19	42.5857	Yes	Yes	No	No
CG34266	NM_001104037	0	2.47891	NA	0	NA	No	No	No	No
Dscam3	NM_001104355	0	0	NA	0	NA	No	No	No	No
CG34264	NM_001144392	0	0	NA	0	NA	No	No	No	No
Dscam1	NM_001273835	0.0139014	0.371365	26.7143	0	NA	No	No	No	No
CG34263	NM_001103989	0	0	NA	1	47.4974	No	No	No	No
CG34260	NM_001275191	0	0	NA	0	NA	No	No	No	No
CG34261	NM_001104186	37.7362	74.5233	1.97485	99	67.1147	Yes	Yes	No	No
CG34268	NM_001103995	0	0	NA	0	NA	No	No	No	No
CG34269	NM_001103996	0	0	NA	1	52.9027	No	No	No	No
AlkB	NM_206735	23.0854	17.2883	0.748885	101	44.6002	Yes	Yes	Yes	No
CG32816	NM_001297808	2.14884	4.20639	1.95752	8	39.8432	No	No	No	No
Rh3	NM_079687	0	0	NA	0	NA	No	No	No	No
CG44812	NM_001299909	0	0	NA	0	NA	No	No	No	No
san	NM_080040	184.056	255.114	1.38607	732	70.1365	Yes	Yes	Yes	No
Rh5	NM_001298930	0.146578	0.244733	1.66965	0	NA	No	No	No	No
CG32812	NM_130543	0.128255	0	0	0	NA	No	No	No	No
CG5543	NM_137988	27.1701	10.9379	0.402573	160	42.8468	Yes	Yes	Yes	No
CG5541	NM_206715	56.8973	23.0481	0.405083	217	58.0226	Yes	Yes	Yes	No
EcR	NM_001169590	25.0631	3.84676	0.153483	191	31.7957	Yes	No	Yes	No
sas	NM_001275408	0.0800322	0.0534502	0.667858	0	NA	No	No	No	No
CG31997	NM_001297780	0.608648	1.35497	2.22619	2	22.0693	No	No	No	No
scrib	NM_001170275	28.3494	3.10555	0.109545	15	37.0361	Yes	Yes	No	No
CG5549	NM_137992	0	0	NA	0	NA	No	No	No	No
sav	NM_176544	33.4053	3.02714	0.0906185	180	33.389	Yes	No	Yes	No
sau	NM_001014460	68.8727	92.7675	1.34694	323	50.3469	Yes	Yes	Yes	No
CG8736	NM_136550	0.182227	0	0	2	141.324	No	No	No	No
CG34191	NM_001103884	108.773	511.529	4.70274	653	51.6668	Yes	Yes	Yes	No
CG8735	NM_001299272	93.9926	121.684	1.29462	73	70.5954	Yes	Yes	No	No
CG43795	NM_001103965	0	0	NA	0	NA	No	No	No	No
CG34196	NM_001103894	0	0	NA	0	NA	No	No	No	No
CG43797	NM_001273083	0	0	NA	0	NA	No	No	No	No
CG43798	NM_001273114	0	0	NA	0	NA	No	No	No	No
CG34199	NM_001103910	0	0	NA	0	NA	No	No	No	No
CG8738	NM_136559	0	0	NA	0	NA	No	No	No	No
NANS	NM_141938	0	0	NA	0	NA	No	No	No	No
c11.1	NM_001298121	23.3593	9.14022	0.391288	150	41.3789	Yes	Yes	Yes	No
CG32240	NM_168082	0	0	NA	0	NA	No	No	No	No
Or9a	NM_078552	0	0	NA	0	NA	No	No	No	No
EDTP	NM_206151	67.0537	28.0497	0.418317	303	33.4588	Yes	Yes	Yes	No
CG8134	NM_001298354	40.5983	1.08891	0.0268216	312	39.4599	Yes	No	Yes	No
CG42540	NM_001274492	0	0	NA	0	NA	No	No	No	No
PPYR1	NM_132784	0	0	NA	1	279.899	No	No	No	No
CG13539	NM_001299830	0	0	NA	0	NA	No	No	No	No
CG13538	NM_137911	0	0	NA	0	NA	No	No	No	No
CG6938	NM_001274804	0	0	NA	0	NA	No	No	No	No
Cyp301a1	NM_136952	0	0	NA	0	NA	No	No	No	No
salm	NM_164966	0	0	NA	0	NA	No	No	No	No
CG13531	NM_001299819	11.3401	4.03591	0.355898	49	59.9185	Yes	Yes	No	No
CG6933	NM_001275168	0	0	NA	0	NA	No	No	No	No
CG13532	NM_137884	0	0	NA	0	NA	No	No	No	No
CG6937	NM_142809	151.307	187.035	1.23613	437	62.702	Yes	Yes	Yes	No
lawc	NM_001258650	26.692	3.12746	0.117168	326	41.4482	No	No	Yes	No
Drep2	NM_001259293	132.763	15.188	0.114399	343	66.77	Yes	Yes	Yes	No
Drep3	NM_136879	0	0	NA	1	39.7763	No	No	No	No
Drep1	NM_001273980	43.555	21.3069	0.489196	181	53.2714	Yes	Yes	Yes	No
Neu2	NM_141059	0	0	NA	2	36.8104	No	No	No	No
Drep4	NM_135787	19.5952	5.57326	0.284419	96	41.5231	Yes	No	No	No
Strip	NM_001274437	34.0896	10.7626	0.315715	204	42.353	Yes	Yes	Yes	No
Rph	NM_001272499	0	0	NA	0	NA	No	No	No	No
salr	NM_001259054	0	0	NA	0	NA	No	No	No	No
sals	NM_169390	0.0292039	0	0	1	84.9812	No	No	No	No
salt	NM_143632	0.0442795	0	0	3	15.9116	No	No	No	No
CG6034	NM_140748	0	0	NA	0	NA	No	No	No	No
Ir7a	NM_132178	0	0	NA	0	NA	No	No	No	No
Ir7b	NM_132182	4.8713	0.14023	0.028787	25	92.6838	No	No	No	No
Ir7c	NM_001258643	9.64947	3.82549	0.396446	27	108.237	Yes	No	No	No
Ir7d	NM_001144703	0	0	NA	0	NA	No	No	No	No
Ir7e	NM_001144704	0	0	NA	0	NA	No	No	No	No
Ir7f	NM_001144705	0	0	NA	0	NA	No	No	No	No
Ir7g	NM_132185	0	0	NA	0	NA	No	No	No	No
elav	NM_001258518	0.0574497	0.191841	3.33929	2	38.4007	No	No	No	No
FBXO11	NM_001275512	66.2955	5.61137	0.0846418	346	38.3729	Yes	Yes	Yes	No
kibra	NM_001300400	26.8622	2.46624	0.0918108	184	41.072	Yes	No	Yes	No
Debcl	NM_176098	87.6263	32.1618	0.367034	376	58.9208	Yes	Yes	Yes	No
CG31921	NM_164380	0	0	NA	0	NA	No	No	No	No
CG31926	NM_001272941	1.49787	3.86504	2.58036	4	102.1	No	No	No	No
CG31251	NM_169772	18.0323	5.86712	0.325367	42	39.2932	Yes	No	No	No
CG31928	NM_001272940	3.53675	9.13622	2.58323	18	44.5463	No	Yes	No	No
CG31259	NM_001300304	0	0	NA	0	NA	No	No	No	No
Ocrl	NM_130606	41.4468	26.1117	0.630006	154	44.4855	Yes	Yes	Yes	No
slou	NM_001275879	0	0	NA	0	NA	No	No	No	No
slow	NM_139641	0.432744	0.541897	1.25223	0	NA	No	No	No	No
CG4945	NM_176203	0	0	NA	0	NA	No	No	No	No
CG3264	NM_001299780	0	0	NA	0	NA	No	No	No	No
CG3267	NM_144467	34.9487	22.0016	0.629539	99	42.4846	Yes	Yes	No	No
CG4949	NM_167554	68.8477	63.285	0.919203	403	39.4515	Yes	Yes	Yes	No
Hrb98DE	NM_170370	303.14	53.0201	0.174903	2221	26.6785	Yes	Yes	Yes	No
robl	NM_079047	138.312	448.636	3.24366	425	38.6983	Yes	Yes	Yes	No
CG32698	NM_001272461	1.2073	0	0	11	29.5694	No	No	No	No
Csl4	NM_135648	35.0689	50.936	1.45246	176	37.3157	Yes	Yes	Yes	No
Aats-pro	NM_001274408	8.25455	20.0468	2.42858	28	79.2852	No	No	No	No
CG32695	NM_001298136	0	0	NA	0	NA	No	No	No	No
CG32694	NM_001298140	0.177411	11.2561	63.4465	1	23.4219	No	No	No	No
betaggt-I	NM_080361	37.5119	52.9414	1.41132	104	78.3684	Yes	Yes	Yes	No
Sk1	NM_132489	0.171737	0	0	1	18.123	No	No	No	No
Sk2	NM_139505	36.0287	19.8665	0.551407	148	66.089	Yes	Yes	Yes	No
Adi1	NM_001104107	69.9838	57.8977	0.827302	347	49.9236	Yes	Yes	Yes	No
CG3088	NM_140077	0	0	NA	0	NA	No	No	No	No
CG3085	NM_001274220	16.4442	4.09148	0.24881	77	36.5072	Yes	No	No	No
Pdk1	NM_001274254	101.131	17.1584	0.169666	772	39.943	Yes	Yes	Yes	No
Pzl	NM_001316564	0	0	NA	0	NA	No	No	No	No
CG15260	NM_135905	0	0	NA	0	NA	No	No	No	No
CG42649	NM_001202035	0	0	NA	0	NA	No	No	No	No
CG15269	NM_135895	0	0	NA	0	NA	No	No	No	No
CG17574	NM_001273997	68.1968	10.7838	0.158128	269	29.0363	Yes	No	Yes	No
CG12061	NM_001110997	0	0	NA	1	46.2995	No	No	No	No
CG12065	NM_132265	11.0779	12.9539	1.16935	44	24.6336	Yes	Yes	No	No
jigr1	NM_143152	182.294	13.9938	0.0767653	357	29.8285	Yes	Yes	Yes	No
CG12069	NM_143562	0	0	NA	0	NA	No	No	No	No
cin	NM_057682	54.8583	18.8395	0.343422	323	29.1161	Yes	Yes	Yes	No
CSN8	NM_164809	68.1157	116.424	1.70921	416	44.9688	Yes	Yes	Yes	No
CG3887	NM_001273141	75.8325	36.386	0.47982	464	24.6422	Yes	Yes	Yes	No
CG3880	NM_138118	0.558851	0	0	3	29.6247	No	No	No	No
Cka	NM_001259008	47.6145	12.6267	0.265187	215	34.7863	Yes	Yes	Yes	No
fz4	NM_078513	42.9986	5.72258	0.133088	204	45.6806	Yes	Yes	Yes	No
CG13298	NM_139780	133.306	72.3472	0.542715	539	24.7865	Yes	Yes	Yes	No
PMP34	NM_168081	50.1265	9.61649	0.191844	252	33.607	Yes	No	Yes	No
CG10376	NM_136055	26.1753	19.1339	0.730989	110	66.8163	Yes	Yes	Yes	No
CG10375	NM_142928	44.7219	15.0468	0.336453	79	41.3271	Yes	Yes	No	No
vari	NM_206011	7.21227	29.6187	4.10671	55	44.76	Yes	Yes	No	No
RanGAP	NM_057364	87.3451	141.664	1.62189	284	53.3475	Yes	Yes	Yes	No
CG2680	NM_130665	0.185586	0	0	0	NA	No	No	No	No
CG2681	NM_130666	0	0	NA	0	NA	No	No	No	No
CG2685	NM_130667	26.6813	7.35506	0.275664	44	34.1392	Yes	Yes	No	No
Awh	NM_001274450	0	0	NA	0	NA	No	No	No	No
Rbf2	NM_079648	41.2169	51.0582	1.23877	247	40.1708	Yes	Yes	Yes	No
CG7414	NM_001202226	100.656	50.2017	0.498747	565	76.8548	Yes	Yes	Yes	No
PTP-ER	NM_166465	26.1907	0.98786	0.0377179	118	45.0955	Yes	No	Yes	No
vkg	NM_001273143	0.809211	4.09988	5.06651	143	54.7515	No	Yes	Yes	No
CG9451	NM_001275121	0.680849	6.13859	9.01609	9	45.3113	No	No	No	No
CG9452	NM_140862	0	0	NA	0	NA	No	No	No	No
CG12288	NM_135978	60.1202	3.84841	0.064012	265	26.1131	Yes	No	Yes	No
CG12289	NM_140208	0	0	NA	0	NA	No	No	No	No
CG9109	NM_001298721	0	0	NA	0	NA	No	No	No	No
CG9106	NM_167433	0	0	NA	0	NA	No	No	No	No
CG9107	NM_164673	25.9544	8.23716	0.317371	137	34.8333	Yes	No	Yes	No
dome	NM_078688	46.7493	32.0007	0.684517	315	28.8315	Yes	Yes	Yes	No
Ndg	NM_206074	0	0	NA	0	NA	No	No	No	No
CG9101	NM_132783	0	0	NA	0	NA	No	No	No	No
pUf68	NM_001169844	61.7271	16.5984	0.268899	317	33.8617	Yes	Yes	Yes	No
Cisd2	NM_143427	129.969	381.283	2.93364	657	60.4758	Yes	Yes	Yes	No
CG15485	NM_135733	0	0	NA	0	NA	No	No	No	No
CG8858	NM_136902	18.1486	48.6933	2.68303	160	62.3839	Yes	Yes	Yes	No
CG15483	NM_135748	0	0	NA	0	NA	No	No	No	No
Kank	NM_001202004	0.441052	0.140267	0.318028	2	50.4461	No	No	No	No
CG15480	NM_135776	0	0	NA	0	NA	No	No	No	No
CG8852	NM_134946	0	0	NA	0	NA	No	No	No	No
CG8851	NM_164544	0	0	NA	0	NA	No	No	No	No
Lerp	NM_170290	15.9361	6.96276	0.436917	90	33.6764	Yes	Yes	No	No
CG1814	NM_136655	11.8018	6.39983	0.542278	56	67.1133	Yes	Yes	No	No
CG1815	NM_143624	29.9049	1.46855	0.0491072	335	25.3499	Yes	No	Yes	No
CG8854	NM_136905	1.07012	0.476459	0.445239	3	34.768	No	No	No	No
CG11396	NM_140998	41.0461	42.4978	1.03537	157	42.7599	Yes	Yes	Yes	No
CG11395	NM_001299592	0	0.203604	NA	3	22.8847	No	No	No	No
JYalpha	NM_001110622	0	0	NA	0	NA	No	No	No	No
CG11391	NM_142573	0	0	NA	0	NA	No	No	No	No
CG18301	NM_135575	0	0	NA	0	NA	No	No	No	No
Rbp4	NM_057587	0.130225	0	0	0	NA	No	No	No	No
CG11399	NM_140997	63.8002	52.0474	0.815788	455	45.1846	Yes	Yes	Yes	No
aurA	NM_057401	67.0298	146.727	2.18898	177	42.8124	Yes	Yes	Yes	No
CG15630	NM_175961	0	0	NA	0	NA	No	No	No	No
aurB	NM_057988	69.6624	81.5468	1.1706	405	44.7061	Yes	Yes	Yes	No
CG12268	NM_001260343	0	0	NA	0	NA	No	No	No	No
twit	NM_136223	0.178591	0	0	0	NA	No	No	No	No
CG13074	NM_140578	0	0	NA	0	NA	No	No	No	No
unpg	NM_057798	0.11441	0	0	0	NA	No	No	No	No
cmet	NM_080254	22.2609	10.8492	0.487366	75	78.5588	Yes	Yes	No	No
CG6454	NM_142992	22.504	4.61736	0.205179	128	43.5355	Yes	Yes	Yes	No
antr	NM_001259355	0	0	NA	0	NA	No	No	No	No
CG13884	NM_138191	1.27559	0	0	0	NA	No	No	No	No
CG13887	NM_001299962	165.009	399.431	2.42067	1051	64.4264	Yes	Yes	Yes	No
G9a	NM_001272159	120.718	27.2566	0.225787	515	52.3547	Yes	Yes	Yes	No
CG13077	NM_136146	0	0	NA	0	NA	No	No	No	No
CG43403	NM_001258920	0	0	NA	0	NA	No	No	No	No
Nep3	NM_001258847	0	0	NA	0	NA	No	No	No	No
Nep2	NM_001275331	74.006	461.265	6.2328	403	49.149	Yes	Yes	Yes	No
Nep1	NM_001297997	0.322178	0.107585	0.333929	1	50.0496	No	No	No	No
Nep5	NM_001300625	0	0	NA	1	28.3911	No	No	No	No
Nep4	NM_142647	0	0	NA	0	NA	No	No	No	No
Apf	NM_164880	21.2518	50.3859	2.3709	7	51.8067	No	Yes	No	No
CG17977	NM_144144	11.6068	0	0	84	25.989	No	No	No	No
CG12111	NM_001272412	0	0	NA	0	NA	No	No	No	No
CG11023	NM_001169365	0.100055	0	0	0	NA	No	No	No	No
MsR2	NM_001274394	0	0	NA	0	NA	No	No	No	No
zpg	NM_001274549	173.163	13.2694	0.0766298	1295	30.4345	Yes	Yes	Yes	No
Cad89D	NM_142297	0	0	NA	0	NA	No	No	No	No
Iswi	NM_078995	82.3496	18.5277	0.224988	384	41.085	Yes	Yes	Yes	No
ttm3	NM_136286	0	0	NA	0	NA	No	No	No	No
ttm2	NM_138179	0.068258	0	0	0	NA	No	No	No	No
CG15876	NM_139668	0	0	NA	0	NA	No	No	No	No
CG15877	NM_139461	41.505	22.2991	0.537262	137	32.4912	Yes	Yes	Yes	No
CG15873	NM_138066	0	0	NA	0	NA	No	No	No	No
CG15870	NM_136997	1.25069	0	0	18	63.9273	No	No	No	No
CG13081	NM_001299158	0	0	NA	0	NA	No	No	No	No
gish	NM_001275696	154.204	48.1633	0.312336	572	36.0369	Yes	Yes	Yes	No
CG8507	NM_141693	217.839	236.143	1.08402	545	38.0353	Yes	Yes	Yes	No
CG13082	NM_136140	0.074303	0	0	0	NA	No	No	No	No
CG8501	NM_136927	0	0	NA	0	NA	No	No	No	No
CG13084	NM_136127	7.77882	20.2488	2.60307	18	68.0853	Yes	Yes	No	No
CG15878	NM_139442	0	0	NA	0	NA	No	No	No	No
CG13086	NM_001273639	0.161412	0	0	0	NA	No	No	No	No
CG30338	NM_165685	11.0416	27.3241	2.47465	37	69.2572	No	Yes	No	No
CG30339	NM_165687	0	0	NA	0	NA	No	No	No	No
Patj	NM_057994	24.7346	19.9153	0.805159	148	49.8567	Yes	Yes	Yes	No
PIG-V	NM_001299580	45.7864	25.0341	0.546758	171	52.6315	Yes	Yes	Yes	No
PIG-U	NM_135394	53.2601	89.5809	1.68195	345	71.4892	Yes	Yes	Yes	No
CG30334	NM_165903	4.46164	5.48901	1.23027	15	107.872	No	No	No	No
mRpL43	NM_079104	50.2451	81.8578	1.62917	220	38.1785	Yes	Yes	Yes	No
mRpL42	NM_078949	80.5444	78.6195	0.976101	179	49.3083	Yes	Yes	Yes	No
mRpL41	NM_137178	36.6111	75.7385	2.06873	112	48.1426	Yes	Yes	Yes	No
mRpL40	NM_079594	49.875	64.6303	1.29584	289	46.1532	Yes	Yes	Yes	No
mRpL47	NM_176433	56.8858	94.1013	1.65421	141	50.6047	Yes	Yes	Yes	No
mRpL46	NM_139404	63.9259	66.9629	1.04751	231	58.2601	Yes	Yes	Yes	No
mRpL45	NM_142815	50.2236	112.413	2.23826	177	56.8163	Yes	Yes	Yes	No
mRpL44	NM_141284	66.5635	74.581	1.12045	314	50.1519	Yes	Yes	Yes	No
mRpL49	NM_001298241	96.1602	121.307	1.26151	335	45.6627	Yes	Yes	Yes	No
mRpL48	NM_134769	50.8274	91.0998	1.79234	123	42.4972	Yes	Yes	Yes	No
LpR2	NM_001104456	54.4205	31.0544	0.570638	242	59.7668	Yes	Yes	Yes	No
PIG-C	NM_139547	17.976	24.2098	1.34679	50	70.3786	Yes	Yes	No	No
LpR1	NM_001276044	13.6151	3.82763	0.281131	86	29.5729	Yes	Yes	No	No
Ca-beta	NM_001259049	0.0374277	0	0	0	NA	No	No	No	No
CG1104	NM_141433	11.3512	25.5039	2.24681	102	51.8513	Yes	Yes	Yes	No
CG1105	NM_141431	19.0954	23.8292	1.2479	210	39.1289	Yes	Yes	Yes	No
CG1103	NM_141199	64.8865	101.645	1.5665	121	45.8693	Yes	Yes	Yes	No
alphaTub85E	NM_079573	1.05327	2.68961	2.55358	0	NA	No	No	No	No
MICAL-like	NM_140364	59.8885	24.9756	0.417035	206	54.5976	Yes	Yes	Yes	No
CG1109	NM_169091	48.822	31.2693	0.640476	80	57.2938	Yes	Yes	No	No
CG4161	NM_001299026	0	0	NA	0	NA	No	No	No	No
CG4164	NM_134681	60.5472	36.8331	0.608337	0	NA	Yes	Yes	No	No
CG4168	NM_001299024	0	0	NA	1	88.3279	No	No	No	No
C15	NM_057525	0	0	NA	0	NA	No	No	No	No
CG14230	NM_134505	49.3828	41.7819	0.846082	15	57.9032	Yes	Yes	No	No
CG14234	NM_134507	0	0	NA	0	NA	No	No	No	No
CG44314	NM_001299401	0	0	NA	0	NA	No	No	No	No
CG43329	NM_001259957	0	0	NA	0	NA	No	No	No	No
CG34039	NM_001038923	34.1614	24.5851	0.719675	91	41.4088	Yes	Yes	No	No
CG43638	NM_001274812	0	0	NA	0	NA	No	No	No	No
Map60	NM_057604	134.641	89.3721	0.663778	697	44.3632	Yes	Yes	Yes	No
Taf6	NM_079437	34.7919	30.6777	0.881747	50	50.0544	Yes	Yes	No	No
CG43321	NM_001258996	0	0	NA	0	NA	No	No	No	No
CG43320	NM_143324	10.2524	6.33126	0.61754	40	44.5604	Yes	No	No	No
CG34031	NM_001259965	0.79224	0	0	6	13.3918	No	No	No	No
CG43630	NM_001260150	0	0	NA	1	37.5932	No	No	No	No
Ada2b	NM_001275438	107.837	26.2945	0.243834	368	50.0733	Yes	Yes	Yes	No
CG34034	NM_001170207	0	0	NA	0	NA	No	No	No	No
mRpL4	NM_080200	54.6859	118.01	2.15797	164	48.9211	Yes	Yes	Yes	No
mRpL2	NM_079298	31.7355	55.0807	1.73562	83	61.0442	Yes	Yes	No	No
mRpL3	NM_078611	66.2805	79.9895	1.20683	142	39.1584	Yes	Yes	Yes	No
mRpL1	NM_079551	82.2109	84.5307	1.02822	234	56.2621	Yes	Yes	Yes	No
lox2	NM_079082	0	0	NA	1	232.059	No	No	No	No
defl	NM_140095	11.4441	14.0122	1.22441	50	53.0524	Yes	Yes	No	No
CG17258	NM_134898	0.0624134	0	0	0	NA	No	No	No	No
CG44174	NM_001275799	0	0	NA	0	NA	No	No	No	No
CG32150	NM_168635	0	0	NA	0	NA	No	No	No	No
RPA3	NM_001298202	189.516	415.075	2.19018	277	86.9282	Yes	Yes	Yes	No
RPA2	NM_136233	169.248	455.405	2.69075	221	83.8201	Yes	Yes	Yes	No
CG6204	NM_142972	7.29196	2.72801	0.374111	61	30.175	Yes	No	No	No
Slimp	NM_170125	16.2287	18.7973	1.15828	39	39.7796	Yes	Yes	No	No
COQ7	NM_143710	87.0144	155.204	1.78366	171	76.4499	Yes	Yes	Yes	No
SrpRbeta	NM_001274667	65.2586	137.425	2.10586	120	48.3229	Yes	Yes	Yes	No
tara	NM_080255	2.08742	2.38988	1.1449	5	25.0792	No	No	No	No
Cdc42	NM_001258833	125.564	261.803	2.08502	712	61.4359	Yes	Yes	Yes	No
CG46192	NM_001316662	0	0	NA	0	NA	No	No	No	No
CG14509	NM_001276131	0	0	NA	0	NA	No	No	No	No
CG14057	NM_140698	53.3503	74.8655	1.40328	114	34.3638	Yes	Yes	Yes	No
CstF-50	NM_143626	23.6044	27.0059	1.1441	121	49.6651	Yes	Yes	Yes	No
CG14507	NM_001104494	0.225404	0	0	0	NA	No	No	No	No
CG14506	NM_001276138	0	0	NA	0	NA	No	No	No	No
CG14053	NM_001272251	1.75369	0	0	18	45.7153	No	No	No	No
CG14052	NM_001272252	0	0	NA	0	NA	No	No	No	No
Dhc98D	NM_079817	1.28824	0.0708119	0.0549678	7	70.6153	Yes	No	No	No
CG14050	NM_001258558	0.993014	0.73688	0.742065	2	22.9324	No	No	No	No
CHMP2B	NM_139690	31.1785	74.8891	2.40195	103	58.5366	Yes	Yes	Yes	No
Mon1	NM_135024	30.2369	7.34963	0.243068	194	25.3258	Yes	Yes	Yes	No
CG10616	NM_001300119	52.8696	64.37	1.21752	268	43.2241	Yes	Yes	Yes	No
Trip1	NM_078754	239.038	209.449	0.876216	1617	55.4124	Yes	Yes	Yes	No
CG18428	NM_001260349	21.3363	12.4684	0.584376	121	48.585	No	No	Yes	No
CG8668	NM_001298811	74.4612	43.3047	0.581574	266	53.8889	Yes	Yes	Yes	No
CG18420	NM_205993	0	0	NA	0	NA	No	No	No	No
Mlh1	NM_057674	27.1656	11.4775	0.422502	86	65.7014	Yes	Yes	No	No
mxc	NM_132320	57.637	0.935261	0.0162267	196	40.389	Yes	No	Yes	No
Hexo2	NM_080342	11.7783	21.1443	1.79518	26	96.5901	Yes	Yes	No	No
Hexo1	NM_168076	15.3266	20.958	1.36742	61	75.3548	Yes	Yes	No	No
CG5958	NM_135275	22.4753	60.5566	2.69436	141	72.3638	Yes	Yes	Yes	No
CG5955	NM_140973	0	0	NA	2	28.5123	No	No	No	No
CG5484	NM_143241	56.8467	150.145	2.64122	234	57.8267	Yes	Yes	Yes	No
CG5482	NM_001299651	68.2234	94.2775	1.38189	521	38.3528	Yes	Yes	Yes	No
CG5953	NM_001273574	18.3732	2.87799	0.156641	37	52.7785	Yes	No	No	No
CG32206	NM_168794	0	0	NA	0	NA	No	No	No	No
CG32204	NM_001104171	0	0	NA	0	NA	No	No	No	No
Cpr67B	NM_140049	0	0	NA	0	NA	No	No	No	No
Su(dx)	NM_164448	60.696	17.5785	0.289616	563	39.6687	Yes	Yes	Yes	No
por	NM_057542	17.5005	0.352044	0.0201162	136	51.3706	Yes	No	Yes	No
Cpr78Cb	NM_001275215	0	0	NA	3	133.661	No	No	No	No
Cpr78Cc	NM_141043	0	0	NA	0	NA	No	No	No	No
Cdep	NM_001104215	0.170271	0.168469	0.98942	0	NA	No	No	No	No
Cpr78Ca	NM_141041	0	0	NA	0	NA	No	No	No	No
Mdh2	NM_142439	219.004	430.73	1.96677	753	109.022	Yes	Yes	Yes	No
Mdh1	NM_001298874	411.495	909.837	2.21105	1798	81.7416	Yes	Yes	Yes	No
CdGAPr	NM_001273671	26.2115	4.90626	0.18718	222	26.4009	Yes	Yes	Yes	No
CG11626	NM_001104365	0.073894	0	0	0	NA	No	No	No	No
Shark	NM_080004	39.051	9.6127	0.246158	213	30.731	Yes	Yes	Yes	No
Pka-C2	NM_170518	1.58708	0	0	1	82.3907	No	No	No	No
Pka-C3	NM_079373	8.42585	14.9937	1.77949	20	60.1237	Yes	Yes	No	No
Usp32	NM_001275145	24.552	11.9761	0.487786	176	49.8665	Yes	Yes	Yes	No
Pka-C1	NM_205950	52.3698	74.1504	1.4159	270	52.5369	Yes	Yes	Yes	No
CG11629	NM_136281	0	0	NA	0	NA	No	No	No	No
Myc	NM_001272275	134.981	0.3835	0.00284114	414	35.7768	Yes	No	Yes	No
Myb	NM_206731	74.8092	49.3468	0.659636	151	66.8512	Yes	Yes	Yes	No
CG12448	NM_165140	0	0	NA	0	NA	No	No	No	No
CG3386	NM_001274288	10.8444	5.5965	0.516072	7	66.978	No	No	No	No
CG32061	NM_168409	0	0	NA	0	NA	No	No	No	No
CG32066	NM_168416	54.6831	54.6646	0.99966	87	53.2362	Yes	Yes	No	No
FLASH	NM_206106	23.9202	0	0	125	27.0906	Yes	No	Yes	No
CG7080	NM_142762	0.506038	0.844905	1.66965	1	51.6191	No	No	No	No
CG7084	NM_001300531	0.0461837	0	0	0	NA	No	No	No	No
CG15674	NM_137749	0.375207	0.208821	0.556549	0	NA	No	No	No	No
Hsp60B	NM_080186	0	0	NA	0	NA	No	No	No	No
CG18284	NM_001298878	0	0	NA	0	NA	No	No	No	No
CG15673	NM_137747	6.41504	15.7092	2.44881	48	75.0285	No	No	No	No
l(3)07882	NM_001316506	36.1471	0.857589	0.023725	50	34.3075	Yes	No	No	No
poe	NM_057638	9.77523	8.97157	0.917787	65	80.677	Yes	Yes	No	No
DIP1	NM_001169343	24.3782	9.15508	0.375543	90	31.2703	Yes	No	No	No
DIP2	NM_138175	30.0667	1.47949	0.049207	165	25.344	Yes	No	Yes	No
CG11560	NM_001316463	17.9704	5.84698	0.325367	105	20.5118	Yes	No	Yes	No
CG11562	NM_134672	67.2841	23.7801	0.353429	181	48.8905	Yes	No	Yes	No
CG11563	NM_143627	52.9011	4.21716	0.0797178	306	31.3758	Yes	No	Yes	No
HDAC6	NM_001272640	42.9032	18.3418	0.427515	65	73.9041	Yes	Yes	No	No
Gp93	NM_143344	143.72	420.877	2.92845	340	63.6893	Yes	Yes	Yes	No
CG13708	NM_139676	0	0	NA	0	NA	No	No	No	No
CG13707	NM_001259704	0	0	NA	0	NA	No	No	No	No
CG13704	NM_139682	0	0.745045	NA	0	NA	No	No	No	No
CG13705	NM_139681	0	0	NA	0	NA	No	No	No	No
E(var)3-9	NM_141595	107.095	2.19304	0.0204775	425	41.3576	Yes	No	Yes	No
CG13700	NM_001275084	0	0	NA	0	NA	No	No	No	No
modSP	NM_080515	0	0	NA	0	NA	No	No	No	No
CG15019	NM_001104032	111.032	42.6486	0.384111	362	22.2877	Yes	Yes	Yes	No
alphaTub67C	NM_079285	380.646	822.752	2.16146	780	75.1144	Yes	Yes	Yes	No
CG15011	NM_139622	17.0339	4.35036	0.255395	127	30.6854	Yes	Yes	Yes	No
CG15012	NM_001169876	66.5624	213.722	3.21086	287	48.8552	Yes	Yes	Yes	No
CG15014	NM_139635	53.2899	4.94307	0.0927581	309	23.1817	Yes	No	Yes	No
Zyx	NM_166819	27.5398	15.4322	0.560361	179	40.3864	Yes	Yes	Yes	No
CG9667	NM_141511	27.7559	53.1627	1.91537	49	43.4716	Yes	Yes	No	No
CG9664	NM_164533	0	0	NA	0	NA	No	No	No	No
CG6136	NM_142203	9.66099	19.2115	1.98857	61	29.4815	No	Yes	No	No
CG9662	NM_001273068	74.1009	205.083	2.76762	380	75.3273	Yes	Yes	Yes	No
CG9669	NM_140668	158.935	208.553	1.31219	887	58.7651	Yes	Yes	Yes	No
CG3746	NM_001299806	0	0.662466	NA	2	31.9077	No	No	No	No
CG3744	NM_001276006	40.7541	10.151	0.24908	203	49.1635	Yes	Yes	Yes	No
Cyp318a1	NM_167318	0	0	NA	1	18.7996	No	No	No	No
CG3748	NM_205941	0	0	NA	0	NA	No	No	No	No
CG7627	NM_001259014	89.5651	59.5758	0.665168	178	76.6196	Yes	Yes	Yes	No
nkd	NM_080049	0.058856	0.393075	6.67858	0	NA	No	No	No	No
Sec10	NM_142961	16.0857	25.6953	1.5974	64	53.8459	Yes	Yes	No	No
Sec13	NM_001300551	116.675	162.009	1.38855	296	58.4139	Yes	Yes	Yes	No
Sec15	NM_142685	32.6686	13.1434	0.402324	205	35.7881	Yes	Yes	Yes	No
Sec16	NM_001298230	28.5807	73.4117	2.56858	183	59.1884	Yes	Yes	Yes	No
Leash	NM_141780	14.3202	1.42214	0.0993098	71	42.8658	Yes	No	No	No
CG5989	NM_139985	29.5095	8.53168	0.289116	291	44.7564	Yes	Yes	Yes	No
CG33337	NM_206546	0	0	NA	0	NA	No	No	No	No
Np	NM_136593	0.0261848	0	0	0	NA	No	No	No	No
Tsp33B	NM_078828	0	0	NA	0	NA	No	No	No	No
Ir21a	NM_001103573	0	0	NA	0	NA	No	No	No	No
Arc42	NM_142583	70.8212	98.0972	1.38514	281	61.1129	Yes	Yes	Yes	No
CG9590	NM_142231	32.0244	35.7135	1.1152	153	42.8174	Yes	Yes	Yes	No
CG9593	NM_142236	0.0732888	0	0	1	64.4794	No	No	No	No
CG9592	NM_140449	0	0	NA	0	NA	No	No	No	No
hep	NM_001272572	30.3803	7.52866	0.247814	82	40.339	Yes	Yes	No	No
CG6689	NM_141794	21.4396	4.5027	0.210018	85	50.5662	Yes	No	No	No
her	NM_001273577	18.7975	0	0	54	35.9992	Yes	No	No	No
CG9596	NM_001298750	28.8957	12.3492	0.427371	97	39.7391	Yes	Yes	No	No
POLDIP2	NM_169054	26.568	2.37446	0.0893728	133	26.5617	Yes	No	Yes	No
CG6686	NM_164978	16.6842	19.2115	1.15148	113	43.2553	No	No	Yes	No
CG6683	NM_139975	26.6507	11.3715	0.426687	179	32.9789	Yes	No	Yes	No
CG11158	NM_132684	5.96928	1.36529	0.228719	18	85.2703	No	No	No	No
kdn	NM_167072	53.9261	18.2377	0.338198	424	21.5569	Yes	Yes	Yes	No
hec	NM_132615	0	0	NA	0	NA	No	No	No	No
l(2)gl	NM_001258875	101.806	7.74947	0.0761202	664	44.4587	Yes	Yes	Yes	No
e(y)2b	NM_001300275	0.338422	0	0	1	28.5743	No	No	No	No
CG17732	NM_001202206	0	0	NA	0	NA	No	No	No	No
HHEX	NM_142681	0.0873584	0	0	1	113.289	No	No	No	No
CG17737	NM_139535	681.639	1476.91	2.16671	2976	53.3426	Yes	Yes	Yes	No
CG17883	NM_001042984	85.0807	33.3256	0.391694	24	41.4348	Yes	Yes	No	No
CG17734	NM_001260114	19.9132	3.96991	0.199361	1861	36.5083	No	No	Yes	No
mRpS7	NM_001273410	126.589	108.559	0.857575	439	45.5288	Yes	Yes	Yes	No
mRpS6	NM_001259694	42.1121	105.81	2.51257	165	49.2379	Yes	Yes	Yes	No
Rpp30	NM_001272879	20.7087	21.0325	1.01564	121	47.4585	Yes	Yes	Yes	No
CG17738	NM_141915	0	0	NA	0	NA	No	No	No	No
mRpS2	NM_078749	46.3806	100.725	2.17171	232	65.7917	Yes	Yes	Yes	No
CG12547	NM_001273775	55.8528	5.7525	0.102994	213	34.8839	Yes	Yes	Yes	No
CG12546	NM_141148	0	0	NA	0	NA	No	No	No	No
CG2162	NM_001169861	90.3477	32.3197	0.357726	383	30.1922	Yes	Yes	Yes	No
CG33137	NM_176163	0.151399	0	0	0	NA	No	No	No	No
CG12541	NM_132150	0	0	NA	0	NA	No	No	No	No
Map205	NM_001276225	48.5722	329.888	6.79169	226	61.1481	Yes	Yes	Yes	No
CG33301	NM_001298864	0	0	NA	0	NA	No	No	No	No
RpS26	NM_001299113	2677.08	1257.28	0.469646	7815	44.4583	Yes	Yes	Yes	No
RpS27	NM_143102	3057.55	2915.28	0.95347	13248	56.2322	Yes	Yes	Yes	No
rush	NM_001297855	40.2275	26.8663	0.667858	530	48.7737	Yes	Yes	Yes	No
RpS25	NM_079591	4398.94	3261.16	0.74135	10785	59.2971	Yes	Yes	Yes	No
RpS23	NM_137095	3306.33	2412.2	0.729572	5326	44.0337	Yes	Yes	Yes	No
l(1)G0020	NM_001298096	21.5049	0.659681	0.0306759	101	30.1909	Yes	No	Yes	No
RpS21	NM_001273041	1230.1	796.232	0.647292	4253	63.1974	Yes	Yes	Yes	No
RpS29	NM_169311	3042.05	2365.08	0.777463	10994	63.8654	Yes	Yes	Yes	No
mdy	NM_165195	23.5084	8.81305	0.374889	151	25.2953	Yes	Yes	Yes	No
CG1486	NM_167743	30.7539	24.7629	0.805194	272	35.5657	Yes	Yes	Yes	No
CG16935	NM_137070	60.015	115.569	1.92567	252	53.2558	Yes	Yes	Yes	No
Dcr-1	NM_079729	16.3012	4.21507	0.258573	86	57.4121	Yes	Yes	No	No
TyrRII	NM_001300451	0	0	NA	0	NA	No	No	No	No
Ser6	NM_078702	0	0	NA	0	NA	No	No	No	No
Ser7	NM_132354	0	0	NA	0	NA	No	No	No	No
ac	NM_057476	0	0	NA	0	NA	No	No	No	No
ab	NM_057214	0	0	NA	0	NA	No	No	No	No
Mpcp	NM_001259828	223.726	374.333	1.67318	2366	64.5389	Yes	Yes	Yes	No
uif	NM_001258995	0	0	NA	0	NA	No	No	No	No
al	NM_164382	0	0	NA	0	NA	No	No	No	No
Ser8	NM_137030	0	0	NA	0	NA	No	No	No	No
CG7759	NM_165831	0.166672	0.556568	3.33929	0	NA	No	No	No	No
ap	NM_165445	0.0592238	0	0	1	40.2053	No	No	No	No
Hop	NM_058006	222.728	930.685	4.17857	993	63.6608	Yes	Yes	Yes	No
Cpr11B	NM_132579	0	0	NA	2	25.1519	No	No	No	No
CG9849	NM_137896	34.6892	26.3493	0.759581	157	29.6897	Yes	Yes	Yes	No
Swim	NM_137808	9.30851	32.1631	3.45524	98	71.3258	Yes	Yes	No	No
Not3	NM_001273783	93.8983	71.8673	0.765374	484	54.5338	Yes	Yes	Yes	No
CG5177	NM_001273262	0.10313	0	0	2	20.3489	No	No	No	No
Blimp-1	NM_001300016	0	0	NA	0	NA	No	No	No	No
Strn-Mlck	NM_001274090	0.101015	0.0435248	0.430876	1	136.203	No	No	No	No
CG5174	NM_001259478	80.1645	194.87	2.43088	684	55.8074	Yes	Yes	Yes	No
CG5172	NM_132976	0	0	NA	0	NA	No	No	No	No
CG5171	NM_001298780	0.104332	0	0	0	NA	No	No	No	No
Rrp46	NM_141744	27.4246	58.5775	2.13594	126	48.0301	Yes	Yes	Yes	No
CG45781	NM_001015335	2.82435	0	0	3	32.6392	No	No	No	No
Trs20	NM_140584	28.5171	34.1654	1.19807	231	31.5734	Yes	Yes	Yes	No
sowah	NM_001144471	19.0384	10.3221	0.542173	89	35.6245	Yes	Yes	No	No
CG1667	NM_136681	52.6574	2.73891	0.0520139	327	26.0506	Yes	No	Yes	No
CG1665	NM_136679	34.1879	87.0738	2.54692	149	66.7604	Yes	Yes	Yes	No
CG1663	NM_136677	30.0053	0.96575	0.0321859	107	28.4895	Yes	No	Yes	No
CG1662	NM_001298280	49.6378	1.1728	0.0236271	179	39.5374	Yes	No	Yes	No
Hen1	NM_136888	14.9501	0.238864	0.0159775	97	30.1258	Yes	No	No	No
Not10	NM_001316562	21.2849	5.21131	0.244836	86	44.9198	Yes	No	No	No
CG17207	NM_206480	0	0	NA	0	NA	No	No	No	No
Arf79F	NM_057607	362.046	1146.99	3.16808	1459	46.5652	Yes	Yes	Yes	No
Mpc1	NM_001275791	65.8465	92.2714	1.40131	369	51.9649	Yes	Yes	Yes	No
CG34417	NM_001103426	2.77497	20.5559	7.40763	0	NA	Yes	Yes	No	No
upd2	NM_133049	0	0	NA	2	-0.789334	No	No	No	No
TpnC73F	NM_001300162	0	1.2869	NA	0	NA	No	No	No	No
a5	NM_057650	0	0	NA	0	NA	No	No	No	No
Esyt2	NM_170652	1.03993	6.83325	6.57086	17	82.2298	No	Yes	No	No
a6	NM_001272212	22.8664	0	0	172	40.406	Yes	No	Yes	No
CG7943	NM_170462	47.2742	15.3044	0.323737	189	60.6363	Yes	Yes	Yes	No
SNRPG	NM_132911	406.282	1053.56	2.59316	1197	54.2508	Yes	Yes	Yes	No
CG42666	NM_001201600	31.8431	21.0502	0.661059	204	46.3305	Yes	Yes	Yes	No
CG43400	NM_001259016	0.557401	0	0	0	NA	No	No	No	No
CG43401	NM_001298633	0	0	NA	0	NA	No	No	No	No
CG43402	NM_001298634	0	0.604407	NA	1	3.36309	No	No	No	No
Txl	NM_079214	174.348	159.593	0.915368	802	28.4344	Yes	Yes	Yes	No
CG34204	NM_001103931	0	0	NA	0	NA	No	No	No	No
CG34205	NM_001103937	0	0	NA	0	NA	No	No	No	No
CG34206	NM_001103938	0.103528	0	0	7	53.7522	No	No	No	No
mRpS29	NM_079087	61.9957	71.4689	1.1528	63	64.2903	Yes	Yes	No	No
CG34208	NM_001103943	0.781985	0	0	0	NA	No	No	No	No
cpa	NM_137695	93.3561	71.3029	0.763774	779	43.5209	Yes	Yes	Yes	No
cpb	NM_001272948	66.2094	199.052	3.0064	175	68.4492	Yes	Yes	Yes	No
mRpS25	NM_078598	67.9483	138.035	2.03147	220	56.8482	Yes	Yes	Yes	No
CG13148	NM_136967	1.74273	1.77115	1.01631	7	66.0392	No	No	No	No
mRpS23	NM_165065	83.3325	93.6192	1.12344	506	39.5499	Yes	Yes	Yes	No
CG8417	NM_141683	13.2005	13.672	1.03572	90	32.1979	Yes	Yes	No	No
mRpS21	NM_001275606	104.256	231.256	2.21816	558	49.3526	Yes	Yes	Yes	No
cpx	NM_001275319	0	0	NA	1	17.1961	No	No	No	No
Cks30A	NM_057599	91.5905	264.351	2.88622	509	81.0498	Yes	Yes	Yes	No
prominin-like	NM_001259658	29.641	12.2922	0.414703	184	43.3549	Yes	Yes	Yes	No
Arr1	NM_001259144	0	0	NA	0	NA	No	No	No	No
scf	NM_058044	19.8791	34.3355	1.72722	86	37.2607	Yes	Yes	No	No
sca	NM_165951	0	0	NA	0	NA	No	No	No	No
Rbbp5	NM_140952	15.9387	10.0387	0.629831	100	38.6225	Yes	Yes	Yes	No
scb	NM_079026	9.91541	54.1511	5.4613	72	52.9953	Yes	Yes	No	No
Fib	NM_079093	82.3434	32.4938	0.394613	247	25.1281	Yes	Yes	Yes	No
Fic	NM_135182	38.7222	0.188216	0.00486069	141	24.9204	Yes	No	Yes	No
deltaTry	NM_078970	0	0	NA	0	NA	No	No	No	No
GluClalpha	NM_001275811	0	0	NA	0	NA	No	No	No	No
CG5569	NM_137996	74.2914	66.6189	0.896723	485	49.9844	Yes	Yes	Yes	No
Fie	NM_133165	0.114572	1.53036	13.3572	0	NA	No	No	No	No
scu	NM_001258800	209.756	543.611	2.59163	658	75.3245	Yes	Yes	Yes	No
CG11815	NM_139428	0	0	NA	0	NA	No	No	No	No
mnb	NM_167581	69.6828	2.91366	0.0418132	86	31.6889	Yes	No	No	No
CG5567	NM_140758	61.9244	30.2332	0.488227	495	29.9395	Yes	Yes	Yes	No
mnd	NM_079350	45.5493	88.479	1.94249	152	43.0548	Yes	Yes	Yes	No
CG11811	NM_140151	90.7978	26.4011	0.290768	516	42.7512	Yes	Yes	Yes	No
Fim	NM_078661	79.4264	95.6371	1.2041	320	51.2955	Yes	Yes	Yes	No
CG8712	NM_165587	37.3287	9.60576	0.257329	162	42.2336	Yes	Yes	Yes	No
CG8713	NM_136505	5.23751	0.472691	0.0902511	15	56.354	No	No	No	No
tx	NM_001300614	0.0728909	0	0	0	NA	No	No	No	No
Inos	NM_058057	64.4649	158.635	2.4608	203	66.6948	Yes	Yes	Yes	No
tw	NM_001272173	0	0	NA	0	NA	No	No	No	No
Eaf	NM_136429	64.6555	19.4607	0.300991	249	29.4398	Yes	Yes	Yes	No
tn	NM_001144235	0.0178829	0	0	0	NA	No	No	No	No
to	NM_001300596	0	0	NA	0	NA	No	No	No	No
CG43373	NM_001104152	0.0146046	0	0	0	NA	No	No	No	No
tj	NM_001273653	0.448022	5.48561	12.2441	5	27.9469	No	No	No	No
nord	NM_138056	0.140976	0.470761	3.33929	0	NA	No	No	No	No
dsh	NM_078563	57.557	21.2571	0.369323	272	36.9244	Yes	Yes	Yes	No
CG8414	NM_137240	53.9247	0.457729	0.00848828	161	43.2076	Yes	No	Yes	No
CG31493	NM_169174	0	0	NA	0	NA	No	No	No	No
CG13551	NM_166597	438.585	1356.59	3.0931	486	87.3598	Yes	Yes	Yes	No
CG31496	NM_169182	0	0	NA	0	NA	No	No	No	No
CG6912	NM_142162	1.28665	1.50378	1.16875	4	70.7443	No	No	No	No
CG31495	NM_169559	17.7429	20.117	1.13381	62	27.9898	Yes	Yes	No	No
fu12	NM_001169441	43.7421	22.1208	0.50571	224	47.4308	Yes	Yes	Yes	No
CG13558	NM_137956	0	0	NA	0	NA	No	No	No	No
dsd	NM_001276084	27.2726	1.78302	0.0653777	190	41.3406	Yes	No	Yes	No
Irc	NM_001275724	2.16729	8.42149	3.88572	12	62.0823	No	Yes	No	No
ro	NM_170294	0.0803035	0	0	0	NA	No	No	No	No
RpI1	NM_079019	17.6475	0.826895	0.0468563	94	26.7043	Yes	No	No	No
Neos	NM_079231	45.939	29.7725	0.648086	136	27.644	Yes	Yes	Yes	No
CG33926	NM_001300075	0.850821	0	0	2	65.1876	No	No	No	No
CG33927	NM_001031976	0	0	NA	0	NA	No	No	No	No
CG33920	NM_001032043	0	0	NA	0	NA	No	No	No	No
CG33922	NM_001032046	0	0	NA	0	NA	No	No	No	No
CG42758	NM_001202177	0	0	NA	0	NA	No	No	No	No
pbl	NM_079241	47.5473	0.415277	0.00873398	392	41.9329	Yes	No	Yes	No
CG33928	NM_001032105	0	0	NA	0	NA	No	No	No	No
CG42752	NM_001201910	0	0	NA	0	NA	No	No	No	No
CG42751	NM_001201863	0	0	NA	1	166.829	No	No	No	No
RagC-D	NM_136517	42.0896	60.6862	1.44184	123	60.7894	Yes	Yes	Yes	No
Apoltp	NM_205948	0.00621869	0.477618	76.8037	0	NA	No	No	No	No
Smr	NM_001272562	64.6807	3.91934	0.0605951	92	52.8306	Yes	Yes	No	No
lin-52	NM_001297979	94.9816	163.66	1.72307	398	59.0434	Yes	Yes	Yes	No
Dsk	NM_080106	0	0	NA	0	NA	No	No	No	No
CG31278	NM_001300344	8.71873	16.6368	1.90817	47	43.5625	No	No	No	No
CG31279	NM_001275702	1.56336	1.87939	1.20214	24	75.8361	No	No	No	No
CG31275	NM_169732	0	0	NA	0	NA	No	No	No	No
CG31272	NM_141756	0	0	NA	0	NA	No	No	No	No
Sodh-2	NM_079587	22.1439	28.901	1.30515	61	63.1506	Yes	Yes	No	No
Sodh-1	NM_058000	0	1.56221	NA	0	NA	No	No	No	No
TfIIA-S	NM_079743	92.1357	104.21	1.13105	523	33.7985	Yes	Yes	Yes	No
CG4968	NM_135531	156.838	303.173	1.93303	289	62.2055	Yes	Yes	Yes	No
CG4218	NM_001299007	0	0	NA	0	NA	No	No	No	No
CG42693	NM_001202399	0	0	NA	4	29.8081	No	No	No	No
CG4962	NM_140608	0	0	NA	1	115.388	No	No	No	No
CG4960	NM_001300604	0	0	NA	0	NA	No	No	No	No
CG4210	NM_142173	19.3307	53.226	2.75345	38	69.678	No	Yes	No	No
CG4213	NM_134676	0	0	NA	0	NA	No	No	No	No
slmb	NM_001275873	98.8332	91.9157	0.930008	485	64.7917	Yes	Yes	Yes	No
SmF	NM_078984	176.307	380.512	2.15824	679	47.5575	Yes	Yes	Yes	No
CG43736	NM_001298043	42.1994	21.0976	0.49995	283	41.5232	Yes	Yes	Yes	No
SmB	NM_001201851	134.729	138.882	1.03082	330	32.069	Yes	Yes	Yes	No
CCDC53	NM_135334	22.4386	21.8077	0.971883	86	32.0454	Yes	Yes	No	No
Hira	NM_132173	34.6752	19.6462	0.566576	66	48.1681	Yes	Yes	No	No
CG14265	NM_130694	0	0	NA	0	NA	No	No	No	No
CG14260	NM_143294	0.690381	0	0	0	NA	No	No	No	No
CG14262	NM_143293	0	0	NA	0	NA	No	No	No	No
Wwox	NM_135327	11.1943	34.19	3.05423	47	40.8077	Yes	Yes	No	No
Men-b	NM_143702	46.1211	19.2328	0.417007	67	43.6392	Yes	Yes	No	No
Cont	NM_141204	39.735	37.6402	0.947282	251	37.1742	Yes	Yes	Yes	No
CG14907	NM_142317	15.0022	9.85507	0.65691	61	41.2815	No	No	No	No
Adat1	NM_135832	4.04496	5.92426	1.4646	17	50.1071	No	No	No	No
Adk3	NM_001300350	33.6384	78.3165	2.32819	73	57.5288	Yes	Yes	No	No
Adk1	NM_168493	10.6973	7.56454	0.707144	27	26.8544	No	No	No	No
pico	NM_167686	58.4507	62.6843	1.07243	458	59.4337	Yes	Yes	Yes	No
CG15249	NM_001103459	0	0	NA	0	NA	No	No	No	No
Pde8	NM_001169803	0.388526	0.2994	0.770606	1	23.4037	No	No	No	No
CG7755	NM_137266	0	0	NA	0	NA	No	No	No	No
Pde6	NM_142112	0	0	NA	0	NA	No	No	No	No
CG15247	NM_132356	9.09883	1.58523	0.174224	104	38.4309	No	No	Yes	No
alpha-Est10	NM_079533	40.8566	15.7734	0.386068	148	46.6787	Yes	Yes	Yes	No
vib	NM_001275797	77.3101	143.539	1.85666	189	62.0347	Yes	Yes	Yes	No
vig	NM_165102	18.4522	3.96921	0.215108	80	29.4372	Yes	No	No	No
vih	NM_140325	170.516	480.485	2.81783	535	63.0442	Yes	Yes	Yes	No
CG12730	NM_001297967	1.42018	1.35497	0.954083	19	57.5281	No	No	No	No
vir	NM_080161	8.32463	1.90199	0.228478	62	31.9203	Yes	Yes	No	No
vis	NM_176157	0.052816	0.176368	3.33929	0	NA	No	No	No	No
Df31	NM_001032217	1324.33	3159.49	2.38573	3865	55.478	Yes	Yes	Yes	No
Gr10b	NM_078566	0.0751347	0	0	0	NA	No	No	No	No
corto	NM_001259993	81.8006	17.6176	0.215372	294	40.7993	Yes	Yes	Yes	No
CG10399	NM_001298767	18.4326	35.881	1.9466	67	58.9203	Yes	Yes	No	No
Kap3	NM_001103480	47.9858	6.6565	0.138718	331	40.7908	Yes	Yes	Yes	No
CG10395	NM_136323	81.8599	2.36524	0.0288937	406	28.1137	Yes	No	Yes	No
l(2)41Ab	NM_001110887	2.33373	0	0	1	46.4363	No	No	No	No
CG2118	NM_001260462	51.3879	57.6815	1.12247	318	77.613	Yes	Yes	Yes	No
rhea	NM_001274657	19.296	32.0109	1.65894	77	51.4174	Yes	Yes	No	No
BRWD3	NM_170139	37.2619	11.1241	0.298539	251	57.9412	Yes	Yes	Yes	No
CG7432	NM_142568	0	0	NA	0	NA	No	No	No	No
CG2113	NM_139500	0	0	NA	0	NA	No	No	No	No
CG2116	NM_132216	35.0855	1.53956	0.0438803	200	36.847	Yes	No	Yes	No
CG12766	NM_139582	0	0	NA	0	NA	No	No	No	No
cact	NM_057595	222.231	112.66	0.506949	1084	44.7656	Yes	Yes	Yes	No
CG3402	NM_138201	60.2833	109.422	1.81513	309	44.7115	Yes	Yes	Yes	No
CG5361	NM_141721	0	0	NA	0	NA	No	No	No	No
CG5367	NM_135543	3.74819	27.814	7.42065	1	42.3017	No	Yes	No	No
CG9121	NM_001273152	0.215937	0	0	1	50.209	No	No	No	No
CG9123	NM_132790	4.36416	1.92881	0.441965	46	29.3113	No	No	No	No
CG9436	NM_136391	49.9085	104.731	2.09846	143	77.2243	Yes	Yes	Yes	No
CG9125	NM_206769	34.7432	45.4091	1.30699	209	95.0672	Yes	Yes	Yes	No
Acph-1	NM_080178	68.9109	188.082	2.72935	328	98.906	Yes	Yes	Yes	No
CG10669	NM_001170257	11.0339	0.586398	0.0531452	27	24.1866	Yes	No	No	No
CG2371	NM_167294	44.6181	19.8335	0.444516	274	40.2981	Yes	Yes	Yes	No
klu	NM_001300095	0.988903	1.36644	1.38178	4	72.6507	No	No	No	No
RpL10Ab	NM_168480	1637.52	973.9	0.594741	3886	62.2695	Yes	Yes	Yes	No
Est-6	NM_001274820	0.0508167	0	0	0	NA	No	No	No	No
atl	NM_170157	56.422	134.651	2.3865	484	68.619	Yes	Yes	Yes	No
Ets98B	NM_079811	0	0	NA	0	NA	No	No	No	No
scaf	NM_165441	3.61148	17.3885	4.81479	10	73.7384	No	Yes	No	No
Aats-arg	NM_132853	43.9521	86.5702	1.96965	184	39.2759	Yes	Yes	Yes	No
CG10663	NM_001104123	0	0	NA	1	203.479	No	No	No	No
scat	NM_080166	37.3241	6.49852	0.174111	184	37.2323	Yes	Yes	Yes	No
Ptpmeg	NM_167831	47.6263	4.58404	0.0962502	267	37.3398	Yes	Yes	Yes	No
Phae2	NM_001298942	0	0	NA	0	NA	No	No	No	No
betaTry	NM_001299385	0	0	NA	0	NA	No	No	No	No
Crys	NM_001298925	0	0	NA	0	NA	No	No	No	No
betaCOP	NM_078676	36.0114	74.7798	2.07656	58	55.317	Yes	Yes	No	No
CG11041	NM_137609	0	0	NA	0	NA	No	No	No	No
vlc	NM_001169585	117.537	158.365	1.34737	463	37.2277	Yes	Yes	Yes	No
CG11044	NM_137612	0	0	NA	0	NA	No	No	No	No
CG8526	NM_141696	3.18898	2.28191	0.715562	10	80.7701	No	No	No	No
CG8525	NM_136937	8.10306	14.6116	1.80322	36	32.9802	No	Yes	No	No
CG1291	NM_139515	25.5112	42.3751	1.66104	56	61.6073	Yes	Yes	No	No
HLH3B	NM_080316	0	0	NA	0	NA	No	No	No	No
Lpt	NM_138003	17.9435	5.50273	0.30667	81	44.2175	Yes	Yes	No	No
CG9922	NM_001275627	168.276	93.5158	0.555729	668	44.2131	Yes	Yes	Yes	No
CG1299	NM_139605	0	0	NA	0	NA	No	No	No	No
CG2807	NM_001272908	26.3751	12.7948	0.485108	168	39.747	Yes	Yes	Yes	No
CG15812	NM_079173	53.2331	10.7085	0.201162	248	26.4126	Yes	Yes	Yes	No
CG15814	NM_133019	42.9101	27.0136	0.629539	24	46.9594	Yes	Yes	No	No
CG15818	NM_135272	0	0	NA	0	NA	No	No	No	No
Cwc25	NM_134861	64.6056	3.90313	0.0604148	184	40.0487	Yes	No	Yes	No
PPO3	NM_080021	1.72998	3.493	2.01911	2	77.5693	No	No	No	No
PPO2	NM_136599	0	0.536581	NA	0	NA	No	No	No	No
CkIIbeta2	NM_058059	0	0	NA	0	NA	No	No	No	No
EMC8-9	NM_137887	80.8311	272.311	3.36889	290	62.8161	Yes	Yes	Yes	No
beta3GalTII	NM_136555	16.3434	11.013	0.673848	118	54.2184	Yes	Yes	Yes	No
CG6472	NM_137322	0.143829	0	0	0	NA	No	No	No	No
CG6470	NM_001298480	0.250657	0	0	1	54.409	No	No	No	No
CG6475	NM_001104389	0	0	NA	0	NA	No	No	No	No
Ir68a	NM_140198	0	0	NA	0	NA	No	No	No	No
CG6479	NM_140711	60.6506	6.9838	0.115148	728	21.6277	Yes	Yes	Yes	No
sw	NM_057730	8.87318	20.0397	2.25846	0	NA	Yes	Yes	No	No
CG1124	NM_141252	13.7543	19.4617	1.41495	44	88.2839	No	Yes	No	No
CG1126	NM_141242	0	0	NA	0	NA	No	No	No	No
cDIP	NM_142694	0	0	NA	0	NA	No	No	No	No
CG1129	NM_001300235	30.6981	48.21	1.57046	110	29.8887	Yes	Yes	Yes	No
Su(z)2	NM_001169663	3.0971	2.05516	0.663577	20	42.612	Yes	No	No	No
Eig71Ei	NM_001274960	0	0	NA	0	NA	No	No	No	No
Eig71Eh	NM_140537	0	0	NA	0	NA	No	No	No	No
Eig71Ek	NM_140540	0	0	NA	0	NA	No	No	No	No
Eig71Ej	NM_140539	0	0	NA	0	NA	No	No	No	No
ND-B8	NM_144084	0	0	NA	0	NA	No	No	No	No
Eig71Ed	NM_079367	0	0	NA	0	NA	No	No	No	No
Eig71Eg	NM_079370	0	0	NA	0	NA	No	No	No	No
CG4186	NM_001300203	29.4297	25.8617	0.878761	102	53.4682	No	No	Yes	No
Eig71Ea	NM_079364	0	0	NA	0	NA	No	No	No	No
Eig71Ec	NM_079366	0	0	NA	0	NA	No	No	No	No
Eig71Eb	NM_079365	0	0	NA	0	NA	No	No	No	No
Nup153	NM_001103532	35.0242	20.6172	0.588657	296	57.6813	Yes	Yes	Yes	No
AP-2alpha	NM_057471	76.7685	89.9124	1.17122	420	39.0676	Yes	Yes	Yes	No
CG15227	NM_137675	0	0	NA	0	NA	No	No	No	No
CG15554	NM_143587	0	0	NA	0	NA	No	No	No	No
CapaR	NM_001275246	0	1.25683	NA	0	NA	No	No	No	No
wry	NM_205889	0	0	NA	0	NA	No	No	No	No
Lsp1beta	NM_001298627	0.104152	0	0	0	NA	No	No	No	No
CG15556	NM_143588	0	0	NA	0	NA	No	No	No	No
Nup154	NM_001298898	68.1484	25.8463	0.379265	262	65.147	Yes	Yes	Yes	No
CG15550	NM_143578	0	0	NA	0	NA	No	No	No	No
CG10804	NM_001144678	0	0	NA	0	NA	No	No	No	No
CG10553	NM_143126	0	0	NA	0	NA	No	No	No	No
CG17270	NM_142658	47.8014	0.584698	0.0122318	257	21.223	Yes	No	Yes	No
CG17271	NM_142659	75.7887	302.75	3.99467	390	65.4575	Yes	Yes	Yes	No
CG10801	NM_130702	0	0	NA	2	29.9408	No	No	No	No
CG10802	NM_130706	35.1304	86.17	2.45286	77	70.1988	Yes	Yes	No	No
CG10555	NM_001298087	36.2465	1.77272	0.0489074	169	54.6485	Yes	No	Yes	No
CG17278	NM_143973	0	0	NA	0	NA	No	No	No	No
CG10559	NM_143125	0.0672324	0	0	1	194.378	No	No	No	No
CG10809	NM_001169932	27.2926	4.45213	0.163126	151	38.8551	Yes	No	Yes	No
CG7987	NM_169587	52.7288	3.82007	0.0724475	282	38.822	Yes	Yes	Yes	No
CG7988	NM_142434	7.01283	1.37752	0.196429	46	45.3809	No	No	No	No
C3G	NM_176694	12.7608	2.50307	0.196154	54	54.576	Yes	Yes	No	No
CG1440	NM_001298089	113.896	246.855	2.16738	512	51.219	Yes	Yes	Yes	No
AcCoAS	NM_168894	37.5847	10.8242	0.287996	178	38.5015	Yes	Yes	Yes	No
tra	NM_001014588	11.8836	0	0	44	23.8525	No	No	No	No
caps	NM_079332	0.972882	2.39381	2.46053	16	47.1809	No	No	No	No
CG14294	NM_142500	0	0	NA	0	NA	No	No	No	No
CG14079	NM_140834	0.10598	0	0	1	85.4447	No	No	No	No
CG14071	NM_001259034	0	0	NA	0	NA	No	No	No	No
CG14070	NM_001298889	0	0	NA	0	NA	No	No	No	No
CG14073	NM_140803	40.4624	4.36131	0.107787	99	38.6721	Yes	Yes	No	No
CG14072	NM_001259035	0.254887	0	0	0	NA	No	No	No	No
abd-A	NM_001260216	0	0	NA	0	NA	No	No	No	No
CG14074	NM_001259897	23.5515	5.87741	0.249556	119	33.5516	Yes	No	Yes	No
CG11425	NM_141138	0	0	NA	0	NA	No	No	No	No
upd1	NM_080356	0.945992	1.80511	1.90817	23	48.0834	No	No	No	No
Cdc5	NM_138189	28.922	19.8773	0.687273	164	33.8786	Yes	Yes	Yes	No
Cdc6	NM_139990	72.9843	3.74521	0.0513152	437	28.4436	Yes	No	Yes	No
Cdc7	NM_167080	71.5994	10.7427	0.150039	424	51.5155	Yes	Yes	Yes	No
CG12898	NM_136737	0	0	NA	0	NA	No	No	No	No
CG5973	NM_001169430	385.45	1662.64	4.31351	1831	52.4948	Yes	Yes	Yes	No
eIF3-S8	NM_001299616	148.54	93.3295	0.62831	314	55.969	Yes	Yes	Yes	No
eIF3-S9	NM_166239	209.861	121.385	0.578405	913	54.3413	Yes	Yes	Yes	No
ftz	NM_058150	0	0	NA	0	NA	No	No	No	No
CG12895	NM_001273939	54.5253	85.6076	1.57005	156	54.7052	Yes	Yes	Yes	No
CG12896	NM_136740	0.656969	0.877525	1.33572	0	NA	No	No	No	No
e(y)2	NM_080107	71.7349	134.481	1.87469	159	57.3302	Yes	Yes	Yes	No
e(y)3	NM_001272789	106.268	20.9908	0.197526	422	39.3494	Yes	Yes	Yes	No
e(y)1	NM_078667	35.9226	20.8471	0.580333	202	32.0142	Yes	Yes	Yes	No
CG34011	NM_001038789	0	0	NA	0	NA	No	No	No	No
CG34010	NM_001038794	0.102344	0.341755	3.33929	2	45.4802	No	No	No	No
CG31064	NM_143288	4.63154	1.27118	0.274462	51	27.5254	Yes	No	No	No
CG43349	NM_001272934	0	0	NA	0	NA	No	No	No	No
CG43348	NM_001272933	0	0	NA	0	NA	No	No	No	No
CG9154	NM_001298733	16.9635	10.3779	0.611779	45	48.7099	Yes	No	No	No
CG42564	NM_141394	0	0	NA	1	14.357	No	No	No	No
CG42566	NM_001299811	0.442552	0	0	0	NA	No	No	No	No
CG32263	NM_168041	0	0	NA	0	NA	No	No	No	No
CG42561	NM_001169709	0	0	NA	0	NA	No	No	No	No
CG42562	NM_137401	0.243337	0	0	0	NA	No	No	No	No
CG32267	NM_168032	218.275	150.618	0.690038	1269	53.0239	Yes	Yes	Yes	No
Cpr30F	NM_164879	0	0	NA	0	NA	No	No	No	No
Cpr30B	NM_135451	0.390992	0	0	2	55.6337	No	No	No	No
pen-2	NM_001299637	54.4304	36.7721	0.675579	341	27.972	Yes	No	Yes	No
atms	NM_001275334	40.6063	43.5968	1.07365	157	56.7319	Yes	Yes	Yes	No
CG7236	NM_001298706	0	0	NA	0	NA	No	No	No	No
CG11601	NM_001298617	26.7101	21.7796	0.815408	48	89.1795	Yes	Yes	No	No
CG11600	NM_141960	0	0	NA	0	NA	No	No	No	No
Hexim	NM_169595	70.1742	41.9194	0.597362	510	45.4684	Yes	Yes	Yes	No
CG11608	NM_141961	0	0	NA	0	NA	No	No	No	No
Ef1beta	NM_001299577	984.36	1118.43	1.1362	4611	58.8009	Yes	Yes	Yes	No
w	NM_057439	1.19977	3.73928	3.11667	6	72.5903	No	No	No	No
Aats-tyr-m	NM_138123	21.1392	22.1968	1.05003	36	51.9404	Yes	Yes	No	No
CG31739	NM_001273590	44.1622	23.7096	0.536876	274	41.0395	Yes	Yes	Yes	No
Dic4	NM_001275092	0	0	NA	0	NA	No	No	No	No
CG34451	NM_001259846	0	0	NA	1	46.3487	No	No	No	No
Tep5	NM_136144	0	0	NA	0	NA	No	No	No	No
Tep4	NM_001273662	2.07466	13.4879	6.50127	5	61.3244	No	Yes	No	No
CG7239	NM_135116	23.0733	4.44898	0.19282	160	24.6151	Yes	No	Yes	No
Prosbeta2R1	NM_132039	0	0	NA	0	NA	No	No	No	No
CG15653	NM_137696	16.5264	2.90455	0.175752	120	19.8372	No	No	Yes	No
CG15650	NM_001299726	0	0	NA	0	NA	No	No	No	No
Prosbeta2R2	NM_141258	0	0	NA	0	NA	No	No	No	No
CG32085	NM_168470	0	0	NA	0	NA	No	No	No	No
CG32086	NM_168464	0	0	NA	0	NA	No	No	No	No
CG32087	NM_168474	0	0	NA	0	NA	No	No	No	No
CG32081	NM_168430	0	0	NA	0	NA	No	No	No	No
CG32082	NM_168448	0.101282	0	0	2	36.2856	No	No	No	No
CG15382	NM_134806	0.379927	0	0	2	99.0731	No	No	No	No
CG15385	NM_134810	0.281952	0	0	19	57.2934	No	No	No	No
CAH1	NM_078837	0	0	NA	0	NA	No	No	No	No
CG31687	NM_001273698	0.640512	0	0	0	NA	No	No	No	No
CG43965	NM_001274669	378.679	682.439	1.80216	538	57.64	Yes	Yes	Yes	No
Srp54	NM_057999	73.9044	45.608	0.617122	401	34.6179	Yes	Yes	Yes	No
CG31681	NM_164473	0	0	NA	0	NA	No	No	No	No
CG31680	NM_165333	0	0	NA	0	NA	No	No	No	No
Etf-QO	NM_136692	47.0945	104.08	2.21002	296	58.2837	Yes	Yes	Yes	No
CG31689	NM_164495	66.2095	32.1617	0.485756	709	60.6826	Yes	Yes	Yes	No
CG43968	NM_001275309	0	0	NA	0	NA	No	No	No	No
jeb	NM_001273981	0	0	NA	0	NA	No	No	No	No
CG14380	NM_142005	0	0	NA	0	NA	No	No	No	No
CG13760	NM_130654	32.9119	0.399645	0.0121429	220	25.6207	Yes	No	Yes	No
NFAT	NM_001169276	21.0436	2.45487	0.116656	96	38.4215	Yes	No	No	No
CG13766	NM_001298752	19.4634	12.879	0.661703	122	38.7297	Yes	Yes	Yes	No
CG18004	NM_165808	52.8512	3.58181	0.0677716	317	28.9329	Yes	No	Yes	No
Pallidin	NM_140237	23.5956	9.47881	0.401719	132	25.6845	Yes	No	Yes	No
CG15036	NM_144273	0	0	NA	0	NA	No	No	No	No
CG15034	NM_001298051	0	0	NA	0	NA	No	No	No	No
CG15035	NM_132168	0	0	NA	0	NA	No	No	No	No
CG5791	NM_001316505	0	0	NA	0	NA	No	No	No	No
Or19b	NM_167690	0	0	NA	0	NA	No	No	No	No
CG3225	NM_135016	6.9316	2.84257	0.410088	56	28.4149	Yes	No	No	No
Or19a	NM_080274	0	0	NA	0	NA	No	No	No	No
CG33687	NM_001031959	0	0	NA	0	NA	No	No	No	No
CG33689	NM_001031961	0	0	NA	0	NA	No	No	No	No
CG33688	NM_001031960	0	0	NA	0	NA	No	No	No	No
CG9601	NM_141535	34.8744	18.7319	0.537124	76	41.7006	Yes	Yes	No	No
ND-B12	NM_001169769	173.042	229.995	1.32913	489	55.2981	Yes	Yes	Yes	No
CG3594	NM_079131	30.7054	23.338	0.760063	79	35.8862	Yes	Yes	No	No
CG6118	NM_001104336	0.197551	0.0942401	0.477042	0	NA	No	No	No	No
CG9609	NM_132933	82.3466	6.94392	0.0843255	300	30.8816	Yes	No	Yes	No
CG6115	NM_001299072	77.4466	85.3435	1.10197	529	54.8299	Yes	Yes	Yes	No
crol	NM_164971	49.5658	2.1833	0.0440484	341	35.0801	Yes	No	Yes	No
CG3760	NM_001259584	129.323	275.793	2.13259	430	54.7246	Yes	Yes	Yes	No
CG14325	NM_142384	0	0	NA	0	NA	No	No	No	No
CG13659	NM_143121	0	0.22339	NA	1	13.8838	No	No	No	No
CG3764	NM_001275048	25.7151	0.987014	0.0383827	122	28.4647	Yes	No	Yes	No
Acp53Ea	NM_057803	0	0	NA	0	NA	No	No	No	No
CG5828	NM_001273156	63.7514	43.875	0.68822	171	34.3327	Yes	Yes	Yes	No
CG3984	NM_142163	0.205996	3.4394	16.6965	0	NA	No	No	No	No
Hcf	NM_205873	47.028	20.5964	0.437961	435	41.6661	Yes	Yes	Yes	No
CG3987	NM_142164	0	0	NA	0	NA	No	No	No	No
aay	NM_079277	79.5944	212.913	2.67498	184	55.3367	Yes	Yes	Yes	No
uex	NM_001110921	144.029	11.9417	0.0829118	751	35.3669	Yes	Yes	Yes	No
Rcd-1	NM_001272793	89.4834	99.9179	1.11661	757	44.6711	Yes	Yes	Yes	No
CG6567	NM_001104272	37.3344	30.2479	0.810189	186	57.3731	Yes	Yes	Yes	No
Ctf4	NM_137077	43.9056	91.557	2.08532	256	60.9565	Yes	Yes	Yes	No
CG7609	NM_170424	30.2571	25.6714	0.848445	171	52.2736	Yes	Yes	Yes	No
CG7607	NM_140192	0.532232	0	0	3	99.2839	No	No	No	No
CG7606	NM_001316519	0	0	NA	0	NA	No	No	No	No
CG7601	NM_143460	28.8091	44.4898	1.5443	137	71.6803	Yes	Yes	Yes	No
CG7600	NM_140196	25.3669	7.07534	0.27892	120	42.7386	Yes	Yes	Yes	No
Mst33A	NM_058117	0	0	NA	0	NA	No	No	No	No
Rad51D	NM_133074	13.2904	9.56477	0.719675	103	29.9408	No	No	Yes	No
Rad51C	NM_136622	2.76583	5.59753	2.02381	1	100.309	No	No	No	No
Aats-his	NM_001272757	88.7236	97.5922	1.09996	442	84.3573	Yes	Yes	Yes	No
CG14926	NM_001298912	0	0	NA	0	NA	No	No	No	No
Ir10a	NM_001103479	0	0	NA	0	NA	No	No	No	No
CG14921	NM_135647	0.478719	0	0	1	53.6887	No	No	No	No
Fer2LCH	NM_170483	235.281	1174.69	4.99271	991	75.3167	Yes	Yes	Yes	No
LSm7	NM_135963	139.459	339.29	2.43291	459	70.1475	Yes	Yes	Yes	No
LSm1	NM_137715	59.9658	120.441	2.0085	324	49.6463	Yes	Yes	Yes	No
CG14929	NM_135663	0	0	NA	0	NA	No	No	No	No
CG10237	NM_001273648	455.525	1916.39	4.20699	1109	50.654	Yes	Yes	Yes	No
hgo	NM_078820	0	0	NA	0	NA	No	No	No	No
CG10232	NM_142918	0	0	NA	0	NA	No	No	No	No
Eaf6	NM_139724	41.4265	47.9676	1.1579	162	43.4521	Yes	Yes	Yes	No
Klp61F	NM_057470	42.0232	45.1541	1.0745	377	50.8667	Yes	Yes	Yes	No
Dlic	NM_167274	100.062	66.8647	0.668234	580	48.6505	Yes	Yes	Yes	No
Nmnat	NM_143058	18.1944	3.8423	0.21118	85	33.5702	Yes	No	No	No
CG17715	NM_001042945	13.6146	3.81752	0.280398	0	NA	Yes	No	No	No
CG17717	NM_132099	0	0	NA	0	NA	No	No	No	No
CG17712	NM_134775	36.2268	12.657	0.349383	168	40.8063	Yes	Yes	Yes	No
CG12560	NM_001298807	4.818	10.4926	2.1778	16	60.3821	No	No	No	No
Brca2	NM_138081	38.8389	0.0938455	0.00241627	176	45.4804	Yes	No	Yes	No
CG12567	NM_001170363	120.817	25.6873	0.212614	62	33.2278	Yes	No	No	No
Dhx15	NM_136425	32.7447	38.3333	1.17067	112	45.5956	Yes	Yes	Yes	No
l(1)G0004	NM_134543	30.0396	37.5667	1.25057	124	38.5633	Yes	Yes	Yes	No
Pp2B-14D	NM_001258786	30.5129	66.3104	2.17319	267	89.7007	Yes	Yes	Yes	No
l(1)G0007	NM_132719	20.7203	15.0868	0.728116	51	77.1777	Yes	Yes	No	No
CG34325	NM_001298418	1.80814	17.0159	9.41073	3	27.9677	No	No	No	No
exd	NM_001272663	87.2503	35.3307	0.404935	842	35.0021	Yes	Yes	Yes	No
CG34456	NM_001104089	0.532232	0	0	0	NA	No	No	No	No
asun	NM_079655	15.6703	12.9155	0.824202	97	46.2862	Yes	Yes	No	No
CG43251	NM_001259921	0	0	NA	0	NA	No	No	No	No
exu	NM_001169747	485.71	1409.4	2.90173	3505	39.5284	Yes	Yes	Yes	No
CG1468	NM_132357	0	0.471036	NA	1	46.7739	No	No	No	No
Sec31	NM_001299286	30.099	68.0869	2.2621	184	49.39	Yes	Yes	Yes	No
CG34452	NM_001300144	0	0	NA	0	NA	No	No	No	No
CG1461	NM_001298309	0.055319	0	0	0	NA	No	No	No	No
CG1463	NM_132585	21.0371	7.27679	0.345903	94	31.3276	Yes	No	No	No
CG14324	NM_169766	0	0	NA	0	NA	No	No	No	No
CG10793	NM_130698	0	0	NA	1	25.6476	No	No	No	No
CG34436	NM_001104484	0	0	NA	0	NA	No	No	No	No
Cyp4d20	NM_139466	0.0543118	0.362726	6.67858	1	36.5996	No	No	No	No
Pino	NM_001272925	68.0998	41.5563	0.610226	662	21.201	Yes	Yes	Yes	No
CG43089	NM_001300001	0	0	NA	0	NA	No	No	No	No
Vha16-3	NM_001202157	0	0	NA	0	NA	No	No	No	No
Reck	NM_140476	0.101762	0	0	2	35.7361	No	No	No	No
CG5111	NM_143145	0.0448715	0	0	0	NA	No	No	No	No
CG5110	NM_001259133	41.8831	110.895	2.64772	146	64.1785	Yes	Yes	Yes	No
CG31644	NM_001298711	0	0	NA	0	NA	No	No	No	No
Gyk	NM_079916	18.9153	19.2238	1.01631	35	49.6508	Yes	Yes	No	No
CG5114	NM_001259831	27.5777	6.26463	0.227163	153	27.9323	Yes	No	Yes	No
CG32444	NM_168930	0.454625	0	0	1	78.9162	No	No	No	No
Alas	NM_057933	41.6574	87.027	2.08911	233	33.9406	Yes	Yes	Yes	No
CG32445	NM_168931	0	0	NA	0	NA	No	No	No	No
CG1603	NM_001273849	23.6314	0.157195	0.00665197	107	25.2778	Yes	No	Yes	No
CG1602	NM_136447	11.8616	0.958294	0.0807893	30	35.1448	Yes	No	No	No
CG1607	NM_143608	0	0.549648	NA	1	88.188	No	No	No	No
CG32447	NM_001275259	0.0480862	0	0	0	NA	No	No	No	No
CG42692	NM_001201875	0	0	NA	0	NA	No	No	No	No
BicD	NM_001273601	86.3602	18.1335	0.209976	287	48.41	Yes	Yes	Yes	No
Hs2st	NM_057991	37.131	4.30338	0.115897	300	27.1433	Yes	No	Yes	No
Pvr	NM_205927	0.970848	6.96418	7.17329	5	22.8091	No	Yes	No	No
Mur82C	NM_141224	0	0	NA	0	NA	No	No	No	No
sigmar	NM_166622	64.104	3.69072	0.057574	359	37.4002	Yes	No	Yes	No
bip2	NM_143666	109.279	7.86701	0.0719904	417	36.7949	Yes	Yes	Yes	No
bip1	NM_139912	52.254	31.1195	0.595542	299	33.5255	Yes	Yes	Yes	No
crq	NM_175943	109.125	126.936	1.16322	780	52.2442	Yes	Yes	Yes	No
CG13168	NM_206101	0	0	NA	0	NA	No	No	No	No
Or85c	NM_079556	0	0	NA	0	NA	No	No	No	No
Or85b	NM_079555	0	0	NA	0	NA	No	No	No	No
CG13164	NM_165873	0	0	NA	0	NA	No	No	No	No
CG34221	NM_001299343	11.5063	64.3586	5.59331	44	67.7324	No	Yes	No	No
LysD	NM_057475	0.215937	0	0	0	NA	No	No	No	No
CG13163	NM_001299413	29.9094	51.803	1.732	76	52.0351	Yes	Yes	No	No
Or85e	NM_001275445	0	0	NA	0	NA	No	No	No	No
Or85d	NM_079557	0	0	NA	0	NA	No	No	No	No
crb	NM_001260355	25.6921	81.8665	3.18644	405	38.1085	Yes	Yes	Yes	No
crc	NM_165374	213.581	19.0527	0.0892064	984	70.394	Yes	Yes	Yes	No
CG2065	NM_001273858	0.283275	0	0	0	NA	No	No	No	No
LysP	NM_057480	0	0	NA	0	NA	No	No	No	No
Drl-2	NM_001299442	0	0	NA	0	NA	No	No	No	No
crn	NM_057770	23.1189	20.1166	0.870137	107	27.4075	Yes	Yes	Yes	No
CG45105	NM_001300418	0	0	NA	0	NA	No	No	No	No
crm	NM_166951	51.8996	11.6899	0.225241	425	53.9438	Yes	Yes	Yes	No
CG11836	NM_170199	37.0349	14.2697	0.385303	165	46.366	Yes	No	Yes	No
sev	NM_078559	0.86732	3.84987	4.43881	0	NA	No	Yes	No	No
CG11835	NM_001298620	0.137801	0	0	0	NA	No	No	No	No
312	NM_138261	37.1744	20.2915	0.545846	159	34.6701	Yes	Yes	Yes	No
CG11839	NM_170198	36.6111	30.8459	0.842529	87	42.3655	Yes	Yes	No	No
Zmynd10	NM_140368	0.616726	0.617828	1.00179	4	72.6439	No	No	No	No
XRCC1	NM_131989	35.9421	1.94791	0.0541957	147	32.3738	Yes	No	Yes	No
sel	NM_136703	74.5036	26.3789	0.354062	327	30.8693	Yes	Yes	Yes	No
Cyp28d1	NM_135068	1.43534	2.58085	1.79808	14	47.2681	No	No	No	No
sei	NM_001299885	7.29314	0.854524	0.117168	50	54.9781	Yes	No	No	No
Cyp28d2	NM_135067	0.055319	0	0	0	NA	No	No	No	No
CG4646	NM_001299453	52.2992	83.9743	1.60565	171	41.0449	Yes	Yes	Yes	No
CG8778	NM_136961	49.6533	118.659	2.38976	149	90.8795	Yes	Yes	Yes	No
CG4645	NM_001298242	40.935	69.7789	1.70463	219	41.0367	Yes	Yes	Yes	No
CG30103	NM_166233	0	0	NA	0	NA	No	No	No	No
CG30101	NM_137361	0.515759	1.43523	2.78274	3	85.2667	No	No	No	No
CG8773	NM_142016	0.439084	0.733114	1.66965	0	NA	No	No	No	No
CG8771	NM_001259354	15.4385	13.6152	0.881899	118	65.1583	Yes	Yes	Yes	No
CG8777	NM_136608	2.2496	6.70194	2.97917	18	49.6386	No	Yes	No	No
CG8774	NM_169502	0.0308836	0	0	0	NA	No	No	No	No
tho2	NM_134802	28.0973	18.3019	0.651378	142	48.6622	Yes	Yes	Yes	No
Pp1alpha-96A	NM_001275990	86.7534	45.2108	0.521142	276	35.7765	Yes	Yes	Yes	No
Cctgamma	NM_169727	155.702	282.028	1.81133	491	73.7662	Yes	Yes	Yes	No
nopo	NM_001274142	55.8998	44.5769	0.797443	212	43.6691	Yes	Yes	Yes	No
Fas1	NM_001275716	68.7706	113.503	1.65045	200	48.3024	Yes	Yes	Yes	No
Jon99Fi	NM_143543	0	0	NA	0	NA	No	No	No	No
sip1	NM_001298707	10.6306	7.73128	0.727269	46	58.6331	Yes	Yes	No	No
CG43288	NM_001258593	0	0	NA	0	NA	No	No	No	No
sip3	NM_001276223	32.2882	20.7119	0.641471	293	39.0455	Yes	Yes	Yes	No
CG13575	NM_138059	0	0	NA	0	NA	No	No	No	No
CG31475	NM_169851	0.133462	0.445669	3.33929	1	12.922	No	No	No	No
CG13577	NM_138061	0	0	NA	0	NA	No	No	No	No
VGlut	NM_001273010	0	0	NA	0	NA	No	No	No	No
ND-20	NM_001298384	108.657	205.651	1.89267	486	54.8051	Yes	Yes	Yes	No
ND-23	NM_079980	115.083	189.253	1.64449	669	65.4033	Yes	Yes	Yes	No
ND-24	NM_133000	84.1031	205.583	2.44442	409	65.3288	Yes	Yes	Yes	No
CG17333	NM_132428	47.122	53.2401	1.12984	273	32.2555	Yes	Yes	Yes	No
CG42779	NM_001300441	0	0	NA	0	NA	No	No	No	No
CG42778	NM_001202289	0	0	NA	0	NA	No	No	No	No
Ced-12	NM_135704	27.4799	12.7836	0.465198	130	28.7054	Yes	Yes	Yes	No
CG42811	NM_001202350	0	0	NA	0	NA	No	No	No	No
FKBP59	NM_001298855	189.311	633.012	3.34377	119	108.025	Yes	Yes	Yes	No
CG3517	NM_142550	0	0	NA	0	NA	No	No	No	No
[truncated: 10,405 more rows]

## Sheet: Stage 12 oocytes wt
Supplementary File 2B. Processed RNA-seq, ribosome profiling, and PAL-seq data for wild-type stage 12 oocytes.
Otherwise, this table is as in Supplementary File 2A.
Gene name	Initial Refseq ID	RNA (RPKM)	RPF (RPKM)	TE	Poly(A) tags	Mean poly(A)-tail length	Passing RNA cutoff (>=10 RPM)	Passing RPF cutoff(>=10 RPM)	Passing poly(A)-tag cutoff (>=100 tags)	Excluded from analysis
CG11790	NM_170192	77.5954	58.3955	0.752565	407	52.6976	Yes	Yes	Yes	No
CG11796	NM_140968	0	0	NA	0	NA	No	No	No	No
CG12081	NM_001272414	25.8035	0	0	329	23.565	Yes	No	Yes	No
CG13321	NM_001299438	0.450869	0	0	0	NA	No	No	No	No
CG13322	NM_165963	43.5212	0.764895	0.0175752	327	27.5067	Yes	No	Yes	No
CG13323	NM_001299441	0	0	NA	0	NA	No	No	No	No
CG13324	NM_136989	0	0	NA	0	NA	No	No	No	No
CG13325	NM_001299444	0	0	NA	0	NA	No	No	No	No
CG13326	NM_136994	0	0	NA	0	NA	No	No	No	No
CG14247	NM_143245	0	0	NA	0	NA	No	No	No	No
rictor	NM_133143	30.8679	5.45225	0.176632	184	39.1145	Yes	Yes	Yes	No
CG4101	NM_140651	35.3125	0	0	258	34.6655	No	No	Yes	No
Syt1	NM_001273037	0	0	NA	43	39.5194	No	No	No	No
SPR	NM_001297964	0	0	NA	0	NA	No	No	No	No
snRNP-U1-70K	NM_001273244	55.7269	3.37922	0.060639	323	32.7502	Yes	No	Yes	No
Syt4	NM_058116	0	0	NA	0	NA	No	No	No	No
CG8654	NM_001299695	0	0	NA	0	NA	No	No	No	No
Syt7	NM_205871	0.303953	0	0	8	29.913	No	No	No	No
Sac1	NM_138243	66.0534	27.884	0.422143	503	51.8225	Yes	Yes	Yes	No
Cyp6a19	NM_001299505	308.876	701.367	2.27071	1030	79.7429	Yes	Yes	Yes	No
Cyp6a18	NM_001300633	0	1.48672	NA	0	NA	No	No	No	No
Cyp6a17	NM_001299504	0.167424	0	0	0	NA	No	No	No	No
Cyp6a16	NM_001298702	0	0	NA	0	NA	No	No	No	No
Cyp6a14	NM_001299270	1.23699	0	0	6	40.161	No	No	No	No
Cyp6a13	NM_136546	0.766037	1.02022	1.33181	3	57.802	No	No	No	No
bocks	NM_001014611	32.0081	2.54078	0.0793795	198	34.5373	Yes	No	Yes	No
eIF2B-epsilon	NM_206606	24.8745	8.5719	0.344606	178	34.5979	Yes	Yes	Yes	No
Tektin-C	NM_001274520	0	0	NA	0	NA	No	No	No	No
Tektin-A	NM_001273547	0.0713612	0	0	0	NA	No	No	No	No
CG13492	NM_166487	0	0.328673	NA	0	NA	No	No	No	No
CG31710	NM_001273365	2.64967	9.07423	3.42466	28	64.7019	No	No	No	No
CG31712	NM_001273379	20.8946	25.4078	1.216	328	49.7494	Yes	Yes	Yes	No
CG31715	NM_164917	124.585	258.903	2.07812	318	53.3221	Yes	Yes	Yes	No
NimB5	NM_001298990	0	0	NA	0	NA	No	No	No	No
CG13494	NM_137777	0	0	NA	1	29.1525	No	No	No	No
shtd	NM_132797	22.0454	17.044	0.773133	228	46.7199	Yes	Yes	Yes	No
CG4049	NM_138041	26.22	0.883639	0.0337009	249	32.2559	Yes	No	Yes	No
CG4041	NM_131969	24.4276	2.72792	0.111674	108	54.9266	Yes	No	Yes	No
CG4042	NM_001275192	42.3948	32.6672	0.770548	186	62.3953	Yes	Yes	Yes	No
CG4045	NM_130622	25.6956	1.01314	0.0394286	232	29.4656	Yes	No	Yes	No
14-3-3zeta	NM_165742	309.521	415.019	1.34084	1679	29.9263	Yes	Yes	Yes	No
FeCH	NM_170579	56.8082	59.6494	1.05001	596	52.6479	Yes	Yes	Yes	No
Oli	NM_078868	0	0	NA	0	NA	No	No	No	No
Gp210	NM_001273785	61.6523	32.9833	0.534989	344	50.2918	Yes	Yes	Yes	No
CG31698	NM_001298647	0	0	NA	13	18.655	No	No	No	No
Prp38	NM_136619	27.4015	13.9433	0.508852	131	26.4237	Yes	Yes	Yes	No
RpL24-like	NM_141816	214.805	27.7747	0.129302	1611	35.4776	Yes	Yes	Yes	No
Rtf1	NM_001299788	80.9	2.88599	0.0356735	513	41.957	Yes	No	Yes	No
CG14569	NM_141097	0	0	NA	0	NA	No	No	No	No
CG14568	NM_141098	0	0	NA	0	NA	No	No	No	No
CG14567	NM_141100	0.699149	0	0	2	56.5753	No	No	No	No
CG14566	NM_141101	0	0	NA	0	NA	No	No	No	No
CG14565	NM_141103	0	0	NA	0	NA	No	No	No	No
CG14564	NM_141104	0	0	NA	0	NA	No	No	No	No
CG14563	NM_141112	0	0	NA	0	NA	No	No	No	No
CG14562	NM_001275270	17.7443	0	0	159	27.5595	Yes	No	Yes	No
CG14561	NM_001275272	38.9576	0	0	749	22.6262	Yes	No	Yes	No
CG13185	NM_001103809	9.66616	0.48607	0.0502858	81	30.1785	Yes	No	No	No
vig2	NM_170206	295.948	18.4308	0.0622773	2331	33.993	Yes	Yes	Yes	No
CG8204	NM_137206	22.3349	34.4203	1.5411	91	42.2643	No	Yes	No	No
CG10674	NM_139693	73.923	152.951	2.06906	498	46.6561	Yes	Yes	Yes	No
CG10672	NM_139689	44.4934	101.814	2.28829	230	64.0879	Yes	Yes	Yes	No
Mst77F	NM_079464	0	0	NA	3	143.445	No	No	No	No
CG12811	NM_141715	44.4598	81.886	1.8418	123	79.3776	Yes	Yes	Yes	No
Pif2	NM_169147	0	0	NA	0	NA	No	No	No	No
CG12814	NM_001043235	0.310667	2.4825	7.99087	0	NA	No	No	No	No
CG12817	NM_001043236	0	0	NA	0	NA	No	No	No	No
CG12818	NM_141739	23.8698	14.3055	0.599315	94	41.5203	Yes	Yes	No	No
CG18446	NM_136685	43.9614	0.516602	0.0117513	286	42.2382	Yes	No	Yes	No
CG8209	NM_139910	65.5808	262.539	4.00328	123	71.4091	Yes	Yes	Yes	No
H15	NM_001298698	0.694681	0	0	3	93.6675	No	No	No	No
nocte	NM_001272480	58.0498	42.7564	0.736547	266	57.3334	Yes	Yes	Yes	No
Dhap-at	NM_001276028	17.8669	14.1541	0.792198	90	53.3973	Yes	Yes	No	No
CG14309	NM_142461	13.766	74.5592	5.41617	93	36.0224	Yes	Yes	No	No
Acp63F	NM_079182	0	0	NA	1	32.5237	No	No	No	No
CG14302	NM_142492	4.40548	44.0045	9.98858	21	77.1513	No	No	No	No
CG14301	NM_142477	0	0	NA	131	-5.43938	No	No	Yes	No
CG14300	NM_001014639	0	0	NA	0	NA	No	No	No	No
CG7246	NM_132292	28.687	12.4584	0.434286	233	33.1625	Yes	Yes	Yes	No
CG7248	NM_140273	0	0	NA	0	NA	No	No	No	No
wtrw	NM_206459	4.85698	19.0711	3.92655	69	41.853	Yes	Yes	No	No
FMRFaR	NM_001299996	0	0	NA	0	NA	No	No	No	No
Arl5	NM_139944	101.985	29.8153	0.292349	536	34.0675	Yes	Yes	Yes	No
nullo	NM_078512	0	0	NA	0	NA	No	No	No	No
CG15919	NM_144117	0.430689	0	0	0	NA	No	No	No	No
CG9689	NM_132359	0.258231	0	0	1	23.6256	No	No	No	No
CG3906	NM_137958	0	0	NA	0	NA	No	No	No	No
CG3907	NM_138026	7.82263	2.53417	0.323954	49	44.8441	No	No	No	No
CG3902	NM_140812	113.419	54.4036	0.479668	711	22.3588	Yes	Yes	Yes	No
Br140	NM_001299226	46.8236	4.304	0.0919195	279	56.5072	Yes	Yes	Yes	No
CG9682	NM_143528	0	0	NA	0	NA	No	No	No	No
CG9684	NM_141540	66.294	13.9953	0.211109	140	40.494	Yes	Yes	Yes	No
CG9686	NM_132358	0	0	NA	0	NA	No	No	No	No
CG42870	NM_001202336	0	0	NA	0	NA	No	No	No	No
CG42876	NM_001299036	0	0	NA	2	60.2075	No	No	No	No
CG4557	NM_132132	17.3615	1.59261	0.0917319	173	28.2806	Yes	No	Yes	No
p47	NM_136440	122.508	224.618	1.8335	688	78.064	Yes	Yes	Yes	No
Gr66a	NM_079247	0	0	NA	0	NA	No	No	No	No
CG42878	NM_001259507	0	0	NA	0	NA	No	No	No	No
CG2051	NM_141330	95.4835	277.055	2.9016	248	106.505	Yes	Yes	Yes	No
dnd	NM_142738	3.23368	0	0	16	33.2962	No	No	No	No
CG2053	NM_001300703	0	0	NA	0	NA	No	No	No	No
dnc	NM_166968	49.0984	0	0	289	35.5575	Yes	No	Yes	No
CG7024	NM_131954	0.0876871	0	0	0	NA	No	No	No	No
CG2059	NM_132160	25.1553	0	0	301	21.1149	Yes	No	Yes	No
lmd	NM_170044	0	0	NA	0	NA	No	No	No	No
CG7029	NM_176542	32.2989	1.97235	0.0610656	265	36.9323	Yes	Yes	Yes	No
CG7028	NM_001299955	40.2053	7.87794	0.195943	264	39.6948	Yes	Yes	Yes	No
dnk	NM_001275793	281.046	5.19541	0.018486	1683	32.9328	Yes	No	Yes	No
Gr97a	NM_001300622	0	0	NA	0	NA	No	No	No	No
CaMKI	NM_079883	85.3612	42.5277	0.498208	409	60.6397	Yes	Yes	Yes	No
dnt	NM_001273638	19.23	6.8549	0.35647	89	33.008	Yes	Yes	No	No
Jon44E	NM_001299274	0	0	NA	0	NA	No	No	No	No
Ostgamma	NM_135360	39.0342	123.941	3.17518	167	92.2611	Yes	Yes	Yes	No
BoYb	NM_141173	16.6278	6.76798	0.407029	149	32.1875	Yes	Yes	Yes	No
CG5089	NM_137298	0	0	NA	0	NA	No	No	No	No
CheA84a	NM_001031979	0	0	NA	0	NA	No	No	No	No
CG3347	NM_164530	0	0	NA	0	NA	No	No	No	No
CG5080	NM_164406	3.16976	6.7846	2.14041	74	49.3422	No	Yes	No	No
CG5087	NM_140022	19.8106	9.16818	0.462792	114	41.6992	Yes	Yes	Yes	No
CG5084	NM_001299627	0	0	NA	0	NA	No	No	No	No
CG1979	NM_141428	0	0	NA	0	NA	No	No	No	No
M1BP	NM_141568	33.223	3.63119	0.109298	355	22.9358	Yes	No	Yes	No
CG1971	NM_143643	26.611	0	0	150	29.601	Yes	No	Yes	No
CG45061	NM_001298134	0	0	NA	0	NA	No	No	No	No
CG9356	NM_141632	33.6429	6.75844	0.200888	186	34.5433	Yes	No	Yes	No
CG11231	NM_143696	0.39702	0	0	2	39.8527	No	No	No	No
CG11236	NM_135231	0	0	NA	1	-0.269235	No	No	No	No
CG16956	NM_135810	70.2501	162.033	2.30651	183	75.7505	Yes	Yes	Yes	No
CG8331	NM_001201998	212.115	953.873	4.49695	712	74.4401	Yes	Yes	Yes	No
CG8336	NM_168354	37.8264	19.223	0.508191	215	46.405	Yes	Yes	Yes	No
CG16952	NM_206740	36.8349	2.89202	0.0785129	279	35.6879	Yes	No	Yes	No
CG8335	NM_136366	0	0	NA	0	NA	No	No	No	No
MrgBP	NM_136573	39.24	9.19663	0.234369	302	35.0212	Yes	No	Yes	No
CG16959	NM_140493	0	0	NA	4	112.287	No	No	No	No
pinta	NM_001300537	28.7345	5.67727	0.197576	104	46.6727	Yes	No	Yes	No
CG33125	NM_175950	0	0	NA	0	NA	No	No	No	No
CG45095	NM_001300590	0.122992	0	0	0	NA	No	No	No	No
Sox102F	NM_001014695	1.88864	2.02124	1.07021	6	31.3626	No	No	No	No
FRG1	NM_140945	32.8215	6.91925	0.210814	190	23.4794	Yes	No	Yes	No
cype	NM_001258957	397.451	1389.49	3.496	1840	81.4778	Yes	Yes	Yes	No
yata	NM_001276153	39.8069	4.82818	0.12129	249	55.8041	Yes	Yes	Yes	No
ND-20L	NM_001300655	0	0	NA	0	NA	No	No	No	No
Dbx	NM_139420	0.0560133	0	0	0	NA	No	No	No	No
s-cup	NM_136948	0	0	NA	14	53.1986	No	No	No	No
how	NM_001275893	42.2104	62.9407	1.49112	263	39.9604	Yes	Yes	Yes	No
CG9531	NM_135187	15.2026	2.37682	0.156343	78	18.4344	Yes	No	No	No
CG9536	NM_135189	35.2653	26.3487	0.747157	478	48.2646	Yes	Yes	Yes	No
hop	NM_078564	35.404	2.51599	0.071065	233	34.0557	Yes	No	Yes	No
CG6379	NM_001297922	11.5204	0	0	108	24.0651	Yes	No	Yes	No
ppk31	NM_001104474	0	0	NA	1	84.5821	No	No	No	No
ppk30	NM_001276147	0	0	NA	0	NA	No	No	No	No
CG1358	NM_136457	22.8262	52.2141	2.28746	85	75.0331	Yes	Yes	No	No
CG8485	NM_137098	59.6674	0.288383	0.00483319	354	29.2213	Yes	No	Yes	No
CG1354	NM_167202	135.842	30.0108	0.220924	874	62.8992	Yes	Yes	Yes	No
CG8481	NM_001014612	37.7919	34.4988	0.912864	375	43.8814	Yes	Yes	Yes	No
smt3	NM_058063	902.386	1372.51	1.52098	2190	46.3069	Yes	Yes	Yes	No
BG642163	NM_001298675	0	0	NA	0	NA	No	No	No	No
Edg91	NM_079666	0	0	NA	1	100.405	No	No	No	No
CG30091	NM_166110	0	0	NA	0	NA	No	No	No	No
CG30090	NM_166112	0	0	NA	0	NA	No	No	No	No
CG30095	NM_166143	0	0	NA	0	NA	No	No	No	No
CG30094	NM_166149	31.5895	70.3669	2.22754	99	61.01	Yes	Yes	No	No
CG30096	NM_166162	16.7842	7.185	0.428082	69	34.8702	Yes	No	No	No
eIF-1A	NM_001300457	340.48	413.997	1.21592	901	82.497	Yes	Yes	Yes	No
Myo10A	NM_001042804	1.80465	0.311238	0.172465	16	30.9555	Yes	No	No	No
Nup43	NM_142459	42.725	109.536	2.56374	183	71.9831	Yes	Yes	Yes	No
Spp	NM_078720	77.9193	199.576	2.56132	357	37.0345	Yes	Yes	Yes	No
Patronin	NM_001144218	24.7124	6.35581	0.257191	162	37.4642	Yes	Yes	Yes	No
Usp8	NM_142691	30.5982	6.91476	0.225986	131	44.9822	Yes	Yes	Yes	No
Usp1	NM_143430	49.4883	39.4232	0.796617	228	69.9224	Yes	Yes	Yes	No
Usp2	NM_001258871	24.5356	2.11196	0.0860776	163	54.3615	Yes	No	Yes	No
Usp5	NM_139516	67.2521	201.076	2.98988	195	75.5554	Yes	Yes	Yes	No
Usp7	NM_132551	75.8679	105.853	1.39523	564	62.2371	Yes	Yes	Yes	No
CG17571	NM_001299167	0	0	NA	0	NA	No	No	No	No
CG17570	NM_136266	0.343338	16.4614	47.9452	7	56.6472	No	No	No	No
CG17572	NM_136097	0	0	NA	0	NA	No	No	No	No
CG17575	NM_001201988	0	0	NA	0	NA	No	No	No	No
Set1	NM_001110936	36.7705	3.74526	0.101855	362	46.4855	Yes	Yes	Yes	No
Set2	NM_132660	42.5965	0.207551	0.00487248	262	33.9956	Yes	No	Yes	No
Spn27A	NM_001273214	32.9673	15.8063	0.479452	90	57.234	Yes	Yes	No	No
Mis12	NM_139809	38.8263	128.128	3.30003	173	67.1279	Yes	Yes	Yes	No
inaD	NM_001259541	0.0606091	0	0	0	NA	No	No	No	No
inaE	NM_001298302	31.9521	0	0	0	NA	Yes	No	No	No
Set8	NM_169577	78.0882	6.48991	0.0831099	391	39.2801	Yes	Yes	Yes	No
inaC	NM_057515	0	0	NA	0	NA	No	No	No	No
CG9825	NM_137879	0	0	NA	0	NA	No	No	No	No
Pcf11	NM_137155	16.777	7.41535	0.441995	76	42.3409	Yes	Yes	No	No
CG9826	NM_206202	0	0	NA	0	NA	No	No	No	No
CG9821	NM_001275461	368.521	6.32837	0.0171724	2108	38.826	Yes	No	Yes	No
ATPsynbetaL	NM_140579	0	0	NA	0	NA	No	No	No	No
CG9822	NM_137737	0	0	NA	0	NA	No	No	No	No
CG44270	NM_001299176	0	0	NA	0	NA	No	No	No	No
CG44271	NM_001298760	0	0	NA	0	NA	No	No	No	No
Vsx1	NM_001297969	0.0494663	0	0	0	NA	No	No	No	No
CG31717	NM_001273388	36.0262	147.388	4.09113	78	62.3207	Yes	Yes	No	No
Hil	NM_166402	1.21531	0	0	10	24.6644	No	No	No	No
Him	NM_133045	0	0	NA	0	NA	No	No	No	No
MRP	NM_205980	48.0121	4.60517	0.0959169	630	32.1417	Yes	Yes	Yes	No
Tsp68C	NM_168558	0	0	NA	0	NA	No	No	No	No
PH4alphaNE2	NM_170499	0	0	NA	0	NA	No	No	No	No
CG43131	NM_001259995	0	0	NA	0	NA	No	No	No	No
CG43133	NM_001258806	0	0	NA	0	NA	No	No	No	No
CG43134	NM_001258595	2059.18	19146.5	9.29812	5953	79.0973	Yes	Yes	Yes	No
CG43135	NM_001258596	1.61437	0	0	6	66.9197	No	No	No	No
CG43136	NM_001258609	0	0	NA	0	NA	No	No	No	No
CG43137	NM_001258610	0	0	NA	0	NA	No	No	No	No
CG43138	NM_001258634	0	0	NA	0	NA	No	No	No	No
CG43139	NM_001260409	0	0	NA	0	NA	No	No	No	No
PH4alphaNE1	NM_170495	0	0	NA	0	NA	No	No	No	No
CG42269	NM_139762	0.0628597	1.50691	23.9726	1	-2.56011	No	No	No	No
CG42268	NM_168368	0.973078	5.33194	5.47945	23	71.5498	No	Yes	No	No
Droj2	NM_169519	456.387	210.593	0.461435	3899	38.5298	Yes	Yes	Yes	No
CG42266	NM_001144355	0	0	NA	0	NA	No	No	No	No
CG42265	NM_001144688	0.0260382	0	0	0	NA	No	No	No	No
CG42264	NM_132032	0	0	NA	0	NA	No	No	No	No
CG42263	NM_001144511	0	0	NA	0	NA	No	No	No	No
CG42261	NM_143196	0	0	NA	0	NA	No	No	No	No
CG42260	NM_137873	0.0423948	0	0	0	NA	No	No	No	No
Plod	NM_140194	18.7205	6.9043	0.368809	137	34.2118	Yes	Yes	Yes	No
RhoGAP18B	NM_133124	13.019	4.86484	0.373674	197	44.5771	Yes	Yes	Yes	No
CG5348	NM_001259446	0	0	NA	0	NA	No	No	No	No
Trs23	NM_135403	25.9755	7.185	0.276607	133	33.3435	Yes	No	Yes	No
whip	NM_001103760	0	0	NA	0	NA	No	No	No	No
rt	NM_079301	17.4121	0	0	155	11.0607	Yes	No	Yes	No
ru	NM_080051	0	0	NA	1	48.0931	No	No	No	No
dsx	NM_001300291	0	0	NA	0	NA	No	No	No	No
CSN5	NM_058094	68.5114	156.419	2.2831	273	79.0328	Yes	Yes	Yes	No
CG5506	NM_140764	0	0	NA	0	NA	No	No	No	No
ry	NM_079613	0.0307946	0	0	0	NA	No	No	No	No
CG5500	NM_143254	37.0487	3.21795	0.0868573	220	46.952	Yes	No	Yes	No
smo	NM_078719	30.2622	5.72735	0.189257	339	39.8479	Yes	Yes	Yes	No
CG31388	NM_001260113	7.40835	0	0	54	53.8829	No	No	No	No
CSN7	NM_136535	62.2589	143.867	2.31079	326	62.2903	Yes	Yes	Yes	No
rb	NM_080332	50.6641	18.7247	0.369585	242	48.7499	Yes	Yes	Yes	No
smg	NM_001144452	593.669	0	0	5887	36.5455	Yes	No	Yes	No
rn	NM_001275414	0	0	NA	0	NA	No	No	No	No
Spred	NM_001274050	34.0632	0	0	287	43.8482	Yes	No	Yes	No
dsb	NM_001104007	1.55915	23.5637	15.1132	34	55.9014	No	Yes	No	No
rk	NM_057354	0.302219	0	0	2	37.3218	No	No	No	No
CG42402	NM_001276243	0.337944	0	0	0	NA	No	No	No	No
Su(z)12	NM_143802	59.3935	14.215	0.239335	360	41.0744	Yes	Yes	Yes	No
CG42404	NM_001043248	0	0	NA	0	NA	No	No	No	No
CG5342	NM_141831	0	0	NA	0	NA	No	No	No	No
Egm	NM_136843	18.9671	14.4533	0.762016	85	32.3839	Yes	Yes	No	No
Mst57Dc	NM_079774	0.673398	0	0	1	8.9914	No	No	No	No
Mst57Db	NM_079775	0	0	NA	0	NA	No	No	No	No
Mst57Da	NM_080167	0	0	NA	1	136.26	No	No	No	No
wfs1	NM_142822	20.7185	8.43303	0.407029	73	38.0039	Yes	Yes	No	No
CG6974	NM_142157	0	0	NA	0	NA	No	No	No	No
CG6972	NM_001316516	0	0	NA	0	NA	No	No	No	No
FMRFa	NM_078945	0	0	NA	0	NA	No	No	No	No
CG6971	NM_141871	0	0	NA	1	30.0085	No	No	No	No
ato	NM_169213	0	0	NA	0	NA	No	No	No	No
Vinc	NM_001297885	39.3247	99.4229	2.52826	188	64.3255	Yes	Yes	Yes	No
atk	NM_140971	0	0	NA	0	NA	No	No	No	No
CG6978	NM_131960	0	0	NA	0	NA	No	No	No	No
CG14174	NM_140094	9.4418	2.93954	0.311332	65	32.5263	No	No	No	No
rnh1	NM_057967	39.0493	4.60383	0.117898	139	51.1156	Yes	No	Yes	No
Xbp1	NM_079983	66.1024	34.2671	0.518395	215	33.7036	Yes	Yes	Yes	No
CG18659	NM_001259289	37.0327	7.41181	0.200142	367	32.5713	Yes	Yes	Yes	No
mus101	NM_080170	28.4245	15.7221	0.55312	125	42.6345	Yes	Yes	Yes	No
CG15225	NM_137672	0	0	NA	0	NA	No	No	No	No
CG18304	NM_001273241	0.193947	0	0	0	NA	No	No	No	No
CG18870	NM_001299755	43.6394	80.0625	1.83464	296	89.1933	Yes	Yes	Yes	No
CG15553	NM_143584	0	0	NA	0	NA	No	No	No	No
CG16753	NM_139507	38.7816	0	0	299	35.1706	Yes	No	Yes	No
alpha-PheRS	NM_132220	65.5332	114.594	1.74864	189	74.6459	Yes	Yes	Yes	No
wash	NM_001299405	45.9801	25.1888	0.54782	295	38.4789	Yes	Yes	Yes	No
Galphao	NM_206079	44.7912	0	0	238	42.1742	Yes	No	Yes	No
ArfGAP3	NM_141152	51.3599	43.5834	0.848588	401	53.3195	Yes	Yes	Yes	No
ArfGAP1	NM_079316	59.8198	36.6045	0.611913	577	54.4214	Yes	Yes	Yes	No
Sfp84E	NM_001170073	0	0	NA	0	NA	No	No	No	No
CG11426	NM_141137	0.375802	1.50149	3.99543	2	68.2584	No	No	No	No
CG33342	NM_001104434	0	0	NA	0	NA	No	No	No	No
Rala	NM_080324	198.173	134.008	0.676218	1517	44.3711	Yes	Yes	Yes	No
Mal-B2	NM_001201862	15.4857	42.6296	2.75283	47	96.8786	Yes	Yes	No	No
DCTN6-p27	NM_136105	30.2313	41.7004	1.37938	166	71.7262	Yes	Yes	Yes	No
CG13689	NM_001272910	20.6585	0	0	188	31.9982	No	No	Yes	No
Cen	NM_136205	127.079	6.60352	0.0519637	563	40.577	Yes	Yes	Yes	No
REPTOR-BP	NM_164904	8.81721	6.21681	0.705077	121	40.172	No	No	Yes	No
Prp31	NM_140499	34.1546	68.2312	1.99772	147	76.8473	Yes	Yes	Yes	No
CG31960	NM_164559	0	0	NA	0	NA	No	No	No	No
CG31961	NM_164571	42.1449	53.0994	1.25992	117	57.1889	Yes	Yes	Yes	No
Ilp3	NM_140103	0	0	NA	0	NA	No	No	No	No
Sucb	NM_143706	23.8493	6.69045	0.28053	243	20.8324	Yes	No	Yes	No
xit	NM_132127	14.1898	12.2893	0.866062	52	83.5227	Yes	Yes	No	No
CG4908	NM_164892	23.3792	8.20759	0.351063	57	36.2764	Yes	Yes	No	No
CG3597	NM_001273001	0.126437	0	0	1	21.8614	No	No	No	No
CG3224	NM_132107	48.8651	34.943	0.715092	257	31.1764	Yes	Yes	Yes	No
CG4907	NM_142829	0.044976	0	0	0	NA	No	No	No	No
CG3226	NM_132104	240.927	344.221	1.42874	1029	40.7687	Yes	Yes	Yes	No
CG4901	NM_135512	47.5561	24.409	0.513267	189	56.9146	Yes	Yes	Yes	No
CG3223	NM_141501	33.5743	30.4873	0.908053	240	32.5374	Yes	Yes	Yes	No
CG32376	NM_168223	0	0	NA	0	NA	No	No	No	No
Ilp6	NM_130644	0.889672	0	0	0	NA	No	No	No	No
CG42470	NM_001169482	0	0	NA	0	NA	No	No	No	No
Cyp4d21	NM_135285	0	0	NA	0	NA	No	No	No	No
CG33521	NM_001014702	0.06415	0	0	0	NA	No	No	No	No
Ilp4	NM_140104	0	0	NA	0	NA	No	No	No	No
knk	NM_141724	0.181017	0	0	1	94.6596	No	No	No	No
CG14795	NM_130569	0	0	NA	1	47.3661	No	No	No	No
CG14797	NM_001258539	0	0	NA	0	NA	No	No	No	No
trem	NM_142604	30.1353	10.9284	0.362643	151	31.7864	Yes	Yes	Yes	No
CG14798	NM_130582	1.97043	0	0	9	42.5983	No	No	No	No
CG43815	NM_001273070	0	0	NA	0	NA	No	No	No	No
CG10086	NM_141479	0	0	NA	0	NA	No	No	No	No
CG10081	NM_137574	0	0	NA	0	NA	No	No	No	No
CG10082	NM_166466	18.9314	10.714	0.565939	55	47.1481	Yes	Yes	No	No
Usp16-45	NM_001297961	71.9381	11.4034	0.158517	402	45.0269	Yes	Yes	Yes	No
CG3040	NM_132144	32.8925	3.2855	0.0998858	330	36.1064	Yes	No	Yes	No
CG3045	NM_137802	25.3857	9.06797	0.357208	161	34.7695	Yes	Yes	Yes	No
CG10089	NM_001274874	0.37677	0	0	0	NA	No	No	No	No
Mo25	NM_079393	52.9006	27.8635	0.526714	209	29.6264	Yes	Yes	Yes	No
RpII18	NM_080171	73.6242	6.3336	0.0860261	326	51.059	Yes	No	Yes	No
RpII15	NM_001300397	62.7349	60.1568	0.958904	451	38.664	Yes	Yes	Yes	No
CG12025	NM_001299978	56.5989	14.1993	0.250876	410	44.119	Yes	No	Yes	No
CG12795	NM_001103604	121.714	13.3373	0.109579	794	25.9119	Yes	No	Yes	No
cv-2	NM_080070	0.773522	0.662262	0.856164	5	41.1257	No	No	No	No
Asx	NM_001274041	24.74	1.91936	0.0775812	251	30.6115	Yes	No	Yes	No
ph-d	NM_001103395	5.86742	3.44393	0.586958	126	43.9539	Yes	Yes	Yes	No
Cpr47Ef	NM_136816	0	0	NA	0	NA	No	No	No	No
Cpr47Eg	NM_136817	0	0	NA	0	NA	No	No	No	No
Cpr47Ed	NM_136814	0	0	NA	0	NA	No	No	No	No
Cpr47Ee	NM_136815	0.229972	0	0	0	NA	No	No	No	No
Cpr47Eb	NM_136811	0.204849	15.96	77.911	2	45.7732	No	No	No	No
Cpr47Ec	NM_136813	0	0	NA	0	NA	No	No	No	No
CG10338	NM_001299127	25.7133	1.21341	0.0471902	217	35.485	Yes	No	Yes	No
CG10339	NM_138037	0	0	NA	0	NA	No	No	No	No
CG10336	NM_136051	77.2589	10.8652	0.140633	524	34.6148	Yes	No	Yes	No
CG10337	NM_136142	2.36493	0	0	10	51.6206	No	No	No	No
ph-p	NM_001297874	0.39702	0.366061	0.922023	4	59.1487	No	No	No	No
CG10333	NM_136044	22.0189	10.5691	0.480001	42	52.4556	Yes	Yes	No	No
CkIIbeta	NM_080762	202.802	299.275	1.4757	276	52.2183	Yes	Yes	Yes	No
CG12605	NM_001274458	0.0673398	0	0	0	NA	No	No	No	No
Sgs8	NM_057371	0	0	NA	0	NA	No	No	No	No
Sgs7	NM_057370	0	0	NA	0	NA	No	No	No	No
Sgs5	NM_079664	0	0	NA	0	NA	No	No	No	No
Sgs4	NM_057369	0	0	NA	0	NA	No	No	No	No
Sgs3	NM_079300	0	0	NA	0	NA	No	No	No	No
Sgs1	NM_078751	0	0	NA	0	NA	No	No	No	No
hui	NM_166071	0	0	NA	0	NA	No	No	No	No
CG12241	NM_142175	22.0578	15.7523	0.714137	132	30.2353	Yes	Yes	Yes	No
CG1503	NM_001298582	8.78576	0	0	55	29.5548	No	No	No	No
CG8814	NM_134885	51.6529	4.73822	0.0917319	234	29.9561	Yes	No	Yes	No
CG8813	NM_134883	0.15141	0	0	0	NA	No	No	No	No
CG1504	NM_001272814	0	0	NA	0	NA	No	No	No	No
Keap1	NM_142337	3.90478	1.33725	0.342466	17	39.1814	No	No	No	No
Pkcdelta	NM_132569	0	0	NA	0	NA	No	No	No	No
Eip93F	NM_001275888	8.76796	7.68484	0.876469	29	38.3584	Yes	Yes	No	No
RpL18A	NM_079050	2329.92	481.45	0.206638	8370	58.808	Yes	Yes	Yes	No
CG8818	NM_136950	32.732	8.2473	0.251964	284	75.8345	Yes	Yes	Yes	No
CG2316	NM_166736	76.4981	5.45385	0.071294	874	29.5927	Yes	Yes	Yes	No
CG7766	NM_001258659	31.8408	1.63255	0.0512722	204	25.3042	Yes	No	Yes	No
Ctr1A	NM_132108	32.641	82.546	2.5289	139	53.7542	Yes	Yes	Yes	No
CG2310	NM_170411	23.6519	0	0	296	19.8852	Yes	No	Yes	No
cv-c	NM_001104316	0.6263	0.104264	0.166476	8	72.1538	No	No	No	No
Tgi	NM_168555	24.0171	2.34427	0.0976083	312	18.4991	Yes	No	Yes	No
ste24b	NM_137330	0.188385	0	0	3	67.6028	No	No	No	No
ste24a	NM_137331	66.5421	134.797	2.02574	370	39.4948	Yes	Yes	Yes	No
CG6415	NM_135597	0.104354	0	0	0	NA	No	No	No	No
CG6414	NM_001316636	0	0	NA	0	NA	No	No	No	No
CG7839	NM_140174	48.6137	0	0	291	37.2116	Yes	No	Yes	No
CG6412	NM_136003	72.0291	28.9935	0.402525	595	44.8379	Yes	Yes	Yes	No
CG7834	NM_170428	126.507	338.563	2.67624	1284	107.847	Yes	Yes	Yes	No
CG7837	NM_143469	29.0949	4.06102	0.139578	207	36.5621	Yes	Yes	Yes	No
CG6418	NM_140156	34.6371	11.9338	0.344538	255	33.4295	Yes	Yes	Yes	No
CG10671	NM_168110	31.1494	27.7927	0.892239	145	62.3257	Yes	Yes	Yes	No
CHOp24	NM_001297933	85.3406	288.645	3.38227	443	54.7088	Yes	Yes	Yes	No
CG5697	NM_142675	0	0	NA	0	NA	No	No	No	No
CG5694	NM_164894	87.6341	35.6818	0.407168	459	42.7879	Yes	Yes	Yes	No
Hr38	NM_057771	0.114733	0	0	0	NA	No	No	No	No
CG5693	NM_144325	0	0	NA	0	NA	No	No	No	No
HIPP1	NM_141004	82.789	10.1641	0.122771	542	37.5065	Yes	Yes	Yes	No
Rcd5	NM_139595	72.9721	10.8251	0.148345	410	35.1517	Yes	Yes	Yes	No
Rcd4	NM_135377	55.1807	37.1878	0.673929	325	53.9123	Yes	Yes	Yes	No
Rcd7	NM_168803	0	0	NA	0	NA	No	No	No	No
Rcd6	NM_001169746	1.38877	0	0	20	50.8141	No	No	No	No
Rcd1	NM_001274034	54.2763	30.3455	0.559093	550	40.1427	Yes	Yes	Yes	No
CG32809	NM_001272208	4.07498	0	0	45	57.8814	Yes	No	No	No
Rcd2	NM_140987	0.279339	0	0	0	NA	No	No	No	No
Sp212	NM_206487	0	0	NA	0	NA	No	No	No	No
CG32806	NM_166904	0	0	NA	0	NA	No	No	No	No
CG32801	NM_166913	0	0	NA	0	NA	No	No	No	No
CG32803	NM_001272221	41.466	16.1372	0.389166	231	37.6826	Yes	Yes	Yes	No
CheB38a	NM_206014	0	0	NA	0	NA	No	No	No	No
CheB38b	NM_206013	0	0	NA	0	NA	No	No	No	No
CheB38c	NM_136217	0	0	NA	0	NA	No	No	No	No
Chmp1	NM_001300179	46.6286	126.078	2.70389	172	78.1832	Yes	Yes	Yes	No
CG9186	NM_138253	38.3505	40.1176	1.04608	227	49.7909	Yes	Yes	Yes	No
CG18449	NM_136530	0	0	NA	1	93.9429	No	No	No	No
godzilla	NM_169139	39.0407	20.122	0.515411	154	66.9653	Yes	Yes	Yes	No
Acox57D-p	NM_079078	44.7854	29.4546	0.657685	188	47.1882	Yes	Yes	Yes	No
pxb	NM_001275680	1.96483	0	0	9	69.37	No	No	No	No
TTLL3B	NM_135224	0	0	NA	0	NA	No	No	No	No
NetA	NM_001298314	0.114392	0	0	1	65.2873	No	No	No	No
CG13045	NM_140607	0.474261	0	0	1	12.1328	No	No	No	No
CG13044	NM_140610	0	0	NA	0	NA	No	No	No	No
CG13047	NM_140605	0	4.7331	NA	0	NA	No	No	No	No
CG13046	NM_140606	0.982944	10.3091	10.488	8	68.8062	No	No	No	No
CG13041	NM_140615	0	0	NA	0	NA	No	No	No	No
CG13043	NM_140611	0	0	NA	0	NA	No	No	No	No
CG13042	NM_140613	0	0	NA	0	NA	No	No	No	No
Rpt6R	NM_143554	0.105987	0	0	0	NA	No	No	No	No
CG13049	NM_168657	0	0	NA	0	NA	No	No	No	No
CG13048	NM_001275006	0	0	NA	1	98.113	No	No	No	No
fd102C	NM_143694	0.208946	0	0	1	15.0503	No	No	No	No
Neto	NM_001298282	0	0	NA	0	NA	No	No	No	No
CG30375	NM_165600	0	0	NA	0	NA	No	No	No	No
CG30376	NM_165599	0	0	NA	0	NA	No	No	No	No
CG30377	NM_001299242	47.5739	30.3904	0.638805	187	96.6574	Yes	Yes	Yes	No
Nmd3	NM_057984	32.7224	15.9008	0.485931	252	28.6497	Yes	Yes	Yes	No
CG30371	NM_136526	0	0	NA	0	NA	No	No	No	No
CG30373	NM_001299260	38.5351	100.932	2.61923	197	52.069	Yes	Yes	Yes	No
CG30379	NM_165574	0	0	NA	0	NA	No	No	No	No
Socs44A	NM_078935	30.5024	4.47686	0.146771	85	47.5901	Yes	No	No	No
Rim	NM_001260239	0.0146023	0	0	0	NA	No	No	No	No
Ric	NM_057863	49.4084	0	0	240	37.8879	Yes	No	Yes	No
Irk1	NM_001202341	26.1127	19.5041	0.746921	214	57.8555	Yes	Yes	Yes	No
Irk2	NM_001300556	0	0	NA	0	NA	No	No	No	No
Irk3	NM_001144363	0	0	NA	0	NA	No	No	No	No
Deaf1	NM_001275140	51.9153	0.434548	0.00837032	194	38.7267	Yes	No	Yes	No
CG8673	NM_135338	0	0	NA	0	NA	No	No	No	No
CG12576	NM_001272844	58.4128	4.82389	0.0825828	705	41.6207	Yes	No	Yes	No
CG8671	NM_001299195	40.7739	9.51759	0.233424	401	44.2342	Yes	Yes	Yes	No
CG13309	NM_140005	0	1.14137	NA	0	NA	No	No	No	No
CG8677	NM_001299194	47.7595	3.58707	0.075107	259	32.4062	Yes	Yes	Yes	No
CG8675	NM_132981	40.5663	33.4569	0.824745	160	46.2074	Yes	Yes	Yes	No
CG13300	NM_139786	0	0	NA	0	NA	No	No	No	No
CG13306	NM_144187	0	0	NA	0	NA	No	No	No	No
CG13305	NM_001144441	0	0	NA	0	NA	No	No	No	No
CG34045	NM_001038872	0	0	NA	0	NA	No	No	No	No
CG40635	NM_001110696	0	0	NA	0	NA	No	No	No	No
Ate1	NM_001274172	47.871	3.63162	0.0758627	492	43.9405	Yes	No	Yes	No
CG43677	NM_001274180	0	0	NA	0	NA	No	No	No	No
Aats-thr	NM_001298939	89.6083	181.786	2.02868	433	67.4134	Yes	Yes	Yes	No
CG43851	NM_001273019	0	0	NA	0	NA	No	No	No	No
wts	NM_170524	41.6229	11.3997	0.273881	327	64.3335	Yes	Yes	Yes	No
CG31777	NM_164550	1.30591	0	0	6	46.2805	No	No	No	No
CG31776	NM_164538	0	0	NA	0	NA	No	No	No	No
CG5991	NM_142951	72.7166	129.837	1.78552	680	69.7864	Yes	Yes	Yes	No
CG31778	NM_164549	0	0	NA	0	NA	No	No	No	No
CG43679	NM_001274926	0	0	NA	1	69.8097	No	No	No	No
CG43678	NM_001274925	0	0	NA	1	65.1489	No	No	No	No
CG4022	NM_001259768	33.6642	0	0	276	26.5592	Yes	No	Yes	No
CG4020	NM_001272335	3.22762	2.54521	0.788572	6	93.4572	No	No	No	No
CG4021	NM_137766	0.13394	0	0	0	NA	No	No	No	No
CG4025	NM_130623	10.7597	33.8281	3.14395	91	48.3264	No	Yes	No	No
CG42671	NM_001300099	23.0431	0.399713	0.0173463	245	39.4444	Yes	No	Yes	No
CG42672	NM_137730	19.2845	11.3926	0.590764	125	49.2301	Yes	Yes	Yes	No
CG42673	NM_168353	0.686032	0.548199	0.799087	14	64.4283	No	No	No	No
CG42674	NM_140925	11.3588	0.739946	0.0651429	3	60.518	Yes	No	No	No
CG42675	NM_001202252	0.33181	3.31432	9.98858	7	82.9096	No	No	No	No
CG42676	NM_001299976	15.0134	15.9828	1.06457	95	61.5346	Yes	Yes	No	No
Nop56	NM_142783	146.837	27.3738	0.186423	853	24.895	Yes	Yes	Yes	No
Cdk12	NM_141068	74.4695	0.21334	0.00286479	403	32.7573	Yes	No	Yes	No
pita	NM_166607	54.6543	0	0	558	26.978	Yes	No	Yes	No
Prestin	NM_140767	47.5458	14.0798	0.296132	288	37.2579	Yes	Yes	Yes	No
Vha14-1	NM_057621	166.514	438.285	2.63213	731	63.2156	Yes	Yes	Yes	No
Vha14-2	NM_001260015	0	0	NA	0	NA	No	No	No	No
Prp18	NM_142519	27.4335	0.750745	0.027366	116	30.9844	Yes	No	Yes	No
Prp19	NM_079059	73.2306	28.8607	0.394107	402	40.6952	Yes	Yes	Yes	No
LManIII	NM_001298833	0	0	NA	0	NA	No	No	No	No
CG3698	NM_141000	0	0	NA	0	NA	No	No	No	No
CG3699	NM_130519	0	1.03467	NA	0	NA	No	No	No	No
CG14540	NM_143194	0	0	NA	0	NA	No	No	No	No
CG14543	NM_143201	48.2556	20.3664	0.422053	264	37.7658	Yes	Yes	Yes	No
CG3690	NM_001297835	0	0	NA	1	-16.5092	No	No	No	No
CG14096	NM_140856	0	0	NA	0	NA	No	No	No	No
CG14095	NM_140855	0	0	NA	0	NA	No	No	No	No
CG14546	NM_143191	0	0	NA	0	NA	No	No	No	No
CG10659	NM_136174	0	0	NA	0	NA	No	No	No	No
CG18467	NM_137367	0	0	NA	0	NA	No	No	No	No
CG10651	NM_001299166	0.135277	0	0	0	NA	No	No	No	No
CG10650	NM_001299152	0.39702	4.7588	11.9863	1	6.00836	No	No	No	No
CG10654	NM_001274838	0.205021	0	0	4	63.7682	No	No	No	No
CG10657	NM_140322	0	1.52979	NA	0	NA	No	No	No	No
CG18469	NM_137357	0	0	NA	0	NA	No	No	No	No
Pk34A	NM_135759	0	0	NA	0	NA	No	No	No	No
fru	NM_001275783	2.43864	0	0	3	47.442	No	No	No	No
fry	NM_001259770	9.34467	13.7068	1.4668	53	57.1481	Yes	Yes	No	No
CG12877	NM_001038984	42.7806	0	0	178	44.9155	Yes	No	Yes	No
Calr	NM_001275501	317.255	187.765	0.591843	2879	26.9587	Yes	Yes	Yes	No
Lrt	NM_001299711	0.0498915	0	0	1	61.9327	No	No	No	No
CG14893	NM_142311	0	0	NA	0	NA	No	No	No	No
CG14892	NM_142305	0	0	NA	0	NA	No	No	No	No
CG14327	NM_001300448	0	0	NA	2	50.0768	No	No	No	No
CG14326	NM_142382	0	0	NA	0	NA	No	No	No	No
CG14321	NM_142393	0	0	NA	0	NA	No	No	No	No
CG14323	NM_169767	0	0	NA	0	NA	No	No	No	No
CG14322	NM_001300450	23.2633	0	0	224	44.6174	Yes	No	Yes	No
lectin-22C	NM_001144294	0	0	NA	0	NA	No	No	No	No
CG14329	NM_142379	0	0	NA	0	NA	No	No	No	No
Sulf1	NM_001275697	18.8654	3.32538	0.176269	154	52.6415	Yes	Yes	Yes	No
CG5205	NM_142215	12.2785	0.224692	0.0182997	107	37.8835	Yes	No	Yes	No
stwl	NM_001274910	18.418	0.238406	0.0129442	94	30.2734	Yes	No	No	No
heph	NM_001170322	67.0511	69.3435	1.03419	231	61.7866	Yes	Yes	Yes	No
spin	NM_080084	45.6325	80.8556	1.77189	387	45.3828	Yes	Yes	Yes	No
CG7220	NM_001299364	76.2073	82.4054	1.08133	745	54.5445	Yes	Yes	Yes	No
CG7222	NM_136769	78.5386	19.2907	0.245621	452	36.157	Yes	Yes	Yes	No
CG7227	NM_001298804	0.161758	1.93889	11.9863	5	83.9118	No	No	No	No
CG34245	NM_001202178	0	0	NA	0	NA	No	No	No	No
Cyp317a1	NM_001299507	0.566155	0.484721	0.856164	8	76.0472	No	No	No	No
CG14877	NM_142250	0	0	NA	0	NA	No	No	No	No
Tsp96F	NM_001276048	47.3371	2.89488	0.0611546	284	45.602	Yes	No	Yes	No
Ku80	NM_135923	18.253	21.7361	1.19082	70	65.3833	Yes	Yes	No	No
CG4440	NM_001273568	0	0	NA	0	NA	No	No	No	No
Ppn	NM_176575	0.0281913	0.422386	14.9829	1	82.81	No	No	No	No
CG13228	NM_136801	0	0	NA	0	NA	No	No	No	No
Ahcy89E	NM_206499	2.57914	5.98341	2.31993	28	69.7998	No	No	No	No
RpL35	NM_167043	2235.19	585.288	0.261851	11900	60.7516	Yes	Yes	Yes	No
mms4	NM_136767	28.9477	41.5043	1.43377	115	50.8832	Yes	Yes	Yes	No
CG32024	NM_168296	0	0	NA	0	NA	No	No	No	No
CG32022	NM_001300058	32.0355	52.4982	1.63875	174	44.8383	Yes	Yes	Yes	No
CG32023	NM_168295	0	0	NA	0	NA	No	No	No	No
CG7593	NM_143458	52.984	83.6322	1.57844	444	37.7161	Yes	Yes	Yes	No
CG2070	NM_001273857	0	0	NA	0	NA	No	No	No	No
Khc-73	NM_001274070	24.304	5.27558	0.217066	309	24.0687	Yes	Yes	Yes	No
Cad87A	NM_169440	30.8549	279.489	9.0582	254	35.1183	Yes	Yes	Yes	No
Or13a	NM_078635	0	0	NA	0	NA	No	No	No	No
HBS1	NM_001299977	29.4312	24.9322	0.847133	174	52.2504	Yes	Yes	Yes	No
CG15056	NM_133063	0.105987	0	0	1	-8.60871	No	No	No	No
topi	NM_141688	0.508914	0	0	2	119.941	No	No	No	No
CG15059	NM_167611	0	0	NA	0	NA	No	No	No	No
CG11210	NM_136507	29.1476	25.5159	0.875404	265	25.8685	Yes	Yes	Yes	No
CG11211	NM_136364	0	0	NA	0	NA	No	No	No	No
GABA-B-R2	NM_001300527	0.10087	0	0	0	NA	No	No	No	No
GABA-B-R3	NM_164387	0.0630222	0	0	0	NA	No	No	No	No
CG5783	NM_136025	0	0	NA	0	NA	No	No	No	No
cindr	NM_001276200	37.3646	19.2092	0.514101	250	50.729	Yes	Yes	Yes	No
CG9331	NM_001299178	24.9602	41.2421	1.65232	36	67.3755	Yes	Yes	No	No
CG9330	NM_140872	63.2605	34.818	0.550391	236	58.6107	Yes	Yes	Yes	No
CG12499	NM_142787	20.4401	15.7296	0.769548	124	85.3759	Yes	Yes	Yes	No
l(2)03659	NM_136638	5.56334	0	0	51	38.5272	Yes	No	No	No
CG6178	NM_142964	68.5171	168.217	2.45511	294	81.1274	Yes	Yes	Yes	No
CG9336	NM_136225	18.1139	38.6397	2.13316	138	74.2768	No	Yes	Yes	No
CG9338	NM_001273717	0	0	NA	6	52.036	No	No	No	No
CG6175	NM_001274779	41.1178	2.64027	0.0642123	344	39.725	Yes	No	Yes	No
CG12490	NM_137878	0	0	NA	0	NA	No	No	No	No
CG12493	NM_139670	0.579715	0	0	6	31.6135	No	No	No	No
CG6171	NM_142198	58.8083	12.7904	0.217493	361	33.3913	Yes	No	Yes	No
Daxx	NM_135191	55.3304	1.77803	0.0321349	627	46.9614	Yes	No	Yes	No
CG16798	NM_136186	0.0745018	0	0	1	100.42	No	No	No	No
CG16799	NM_001299712	0.49749	0	0	0	NA	No	No	No	No
CG8319	NM_141663	45.9004	0.662863	0.0144413	181	37.705	Yes	No	Yes	No
CG16978	NM_144312	0	0	NA	1	33.868	No	No	No	No
CG16979	NM_140522	23.7724	36.6473	1.54159	145	54.5532	Yes	Yes	Yes	No
CG8314	NM_137226	37.0636	0.877975	0.0236883	147	40.0987	Yes	No	Yes	No
CG16790	NM_141654	14.9213	7.03346	0.471371	111	38.9908	Yes	No	Yes	No
CG16791	NM_142710	0.967046	0.668729	0.691517	7	61.3032	No	No	No	No
CG16972	NM_135768	19.4709	1.5808	0.081188	119	43.7133	Yes	No	Yes	No
CG8311	NM_137295	41.7677	6.99497	0.167473	233	36.7074	Yes	Yes	Yes	No
CG8312	NM_141661	23.1252	14.0311	0.606745	204	56.4767	Yes	Yes	Yes	No
Vps39	NM_142445	22.2897	18.9624	0.850723	127	56.0252	Yes	Yes	Yes	No
ImpL3	NM_001274545	3.33932	1.53946	0.461012	12	69.3759	No	No	No	No
Cnot4	NM_001273414	89.5402	51.6615	0.576964	406	48.8888	Yes	Yes	Yes	No
Sox100B	NM_143582	0	0	NA	0	NA	No	No	No	No
CG31100	NM_169249	0.174039	0	0	0	NA	No	No	No	No
ham	NM_001273614	0	0	NA	0	NA	No	No	No	No
Drs	NM_079177	0	26.8887	NA	2	44.9285	No	No	No	No
Uvrag	NM_135788	18.1544	3.93691	0.216857	76	71.8861	Yes	No	No	No
Ent3	NM_001300123	0	0	NA	1	23.7377	No	No	No	No
haf	NM_001272946	0.0840876	0	0	0	NA	No	No	No	No
bnk	NM_079865	0	0	NA	0	NA	No	No	No	No
E(spl)mgamma-HLH	NM_079780	0	0	NA	0	NA	No	No	No	No
CG31103	NM_001104444	0	0	NA	0	NA	No	No	No	No
bnl	NM_001144611	0.272918	0	0	1	18.7466	No	No	No	No
bnb	NM_167634	40.6919	617.391	15.1724	788	58.5929	Yes	Yes	Yes	No
CG6310	NM_140172	1.37464	0	0	2	35.8177	No	No	No	No
east	NM_001258556	77.1409	1.15134	0.0149252	641	38.0305	Yes	No	Yes	No
Spase22-23	NM_001260350	93.7768	372.691	3.97424	485	87.2356	Yes	Yes	Yes	No
CG1339	NM_136463	0	0	NA	0	NA	No	No	No	No
Lgr4	NM_001103496	0.0514066	0	0	0	NA	No	No	No	No
Lgr1	NM_169777	0.0498303	0	0	1	6.45974	No	No	No	No
Lgr3	NM_170236	0	0	NA	0	NA	No	No	No	No
MESK2	NM_206192	37.9159	66.4068	1.75142	0	NA	Yes	Yes	No	No
calypso	NM_137252	20.6116	1.06951	0.0518887	144	35.8126	Yes	No	Yes	No
CG3909	NM_141712	51.0216	58.6851	1.1502	222	51.1599	Yes	Yes	Yes	No
Nup98-96	NM_142930	56.941	104.568	1.83643	161	54.0665	Yes	Yes	Yes	No
CG17778	NM_001297812	0	0	NA	0	NA	No	No	No	No
CG17777	NM_001297879	0.430689	0	0	0	NA	No	No	No	No
CG17776	NM_001297878	145.066	120.999	0.834098	793	72.5452	Yes	Yes	Yes	No
St4	NM_001299469	26.1973	68.5511	2.61673	67	35.2211	Yes	Yes	No	No
CG32006	NM_166734	0	0	NA	0	NA	No	No	No	No
GstD7	NM_080375	0.585048	0	0	0	NA	No	No	No	No
GstD6	NM_080176	0.611463	0	0	0	NA	No	No	No	No
GstD5	NM_080175	0.202804	0	0	0	NA	No	No	No	No
GstD4	NM_080174	0.407642	0	0	0	NA	No	No	No	No
Cpsf100	NM_143401	28.0429	44.4008	1.58332	90	52.6989	Yes	Yes	No	No
GstD2	NM_080173	2.44585	8.55071	3.496	4	79.8164	No	No	No	No
GstD1	NM_001038953	1167.36	3172.53	2.71769	2767	73.9296	Yes	Yes	Yes	No
CG32000	NM_001103379	41.1567	14.7588	0.3586	160	78.6749	Yes	Yes	Yes	No
Atac2	NM_136045	10.9295	0	0	105	24.0091	Yes	No	Yes	No
Atac3	NM_167828	23.2749	7.82186	0.336065	196	31.5538	Yes	Yes	Yes	No
Acp98AB	NM_001276097	0	0	NA	0	NA	No	No	No	No
GstD9	NM_001300374	19.0759	39.7128	2.08183	57	73.9937	Yes	Yes	No	No
GstD8	NM_080177	0.206935	0	0	0	NA	No	No	No	No
Gs1	NM_164367	202.647	200.087	0.987365	1281	41.9669	Yes	Yes	Yes	No
RASSF8	NM_143154	56.7514	6.17651	0.108834	69	61.6725	Yes	Yes	No	No
Gs2	NM_001298194	4.25448	23.4303	5.50722	13	60.1388	No	Yes	No	No
NHP2	NM_001274920	118.226	178.823	1.51256	572	31.3212	Yes	Yes	Yes	No
MP1	NM_001316492	3.69989	2.53417	0.684931	36	60.8884	No	No	No	No
CG42685	NM_135873	0	0	NA	0	NA	No	No	No	No
CG17514	NM_001015316	82.4585	17.3235	0.210088	885	44.3994	Yes	Yes	Yes	No
ade5	NM_001272564	23.4508	13.582	0.57917	278	22.8536	Yes	Yes	Yes	No
for	NM_058139	64.5608	20.6631	0.320057	643	57.8167	Yes	Yes	Yes	No
ade3	NM_001298769	34.7548	19.1176	0.550071	217	25.9842	Yes	Yes	Yes	No
CG9806	NM_132415	0	0	NA	0	NA	No	No	No	No
CG9804	NM_141215	18.9806	6.69138	0.352538	176	18.1431	Yes	No	Yes	No
Ugt86Dc	NM_144368	0.0803991	0	0	0	NA	No	No	No	No
CG9801	NM_141570	11.0165	3.16071	0.286906	60	52.0159	Yes	No	No	No
soti	NM_142101	0	0	NA	0	NA	No	No	No	No
CG32457	NM_168982	0	0	NA	0	NA	No	No	No	No
fog	NM_001272855	34.9787	118.28	3.3815	117	86.6853	Yes	Yes	Yes	No
Ef1gamma	NM_001202379	984.96	351.754	0.357125	5342	73.7714	Yes	Yes	Yes	No
CG42688	NM_001273635	0	0	NA	0	NA	No	No	No	No
fon	NM_136115	0	0.433774	NA	3	91.901	No	No	No	No
CG5913	NM_143182	63.306	22.2198	0.35099	348	36.0139	Yes	Yes	Yes	No
foi	NM_001300056	69.8588	10.5815	0.15147	461	42.6031	Yes	Yes	Yes	No
fok	NM_001201926	155.583	32.2268	0.207137	1138	29.6844	Yes	Yes	Yes	No
Mitofilin	NM_079720	53.8091	31.6427	0.588054	244	67.2063	Yes	Yes	Yes	No
CG9759	NM_001300386	0	0	NA	0	NA	No	No	No	No
CG32452	NM_001300219	42.4233	1.74442	0.0411194	154	45.7046	Yes	No	Yes	No
CG6495	NM_135607	0.431342	7.7553	17.9795	1	51.0845	No	Yes	No	No
Gsc	NM_001144290	0	0	NA	1	76.6596	No	No	No	No
CG18628	NM_140144	0	0	NA	0	NA	No	No	No	No
CG9990	NM_170376	3.57544	29.1039	8.13995	43	21.7379	No	Yes	No	No
CG32450	NM_168953	0	0	NA	0	NA	No	No	No	No
Ugt86Dj	NM_144362	0	0	NA	0	NA	No	No	No	No
CG7025	NM_135289	0	0	NA	0	NA	No	No	No	No
RpL23A	NM_079162	1585.59	130.442	0.082267	15271	45.6957	Yes	Yes	Yes	No
Wnt2	NM_057462	0	0	NA	0	NA	No	No	No	No
Wnt6	NM_135264	0	0	NA	0	NA	No	No	No	No
Wnt5	NM_001298478	13.6067	5.66642	0.416442	75	48.8875	Yes	Yes	No	No
Wnt4	NM_057624	0	0	NA	0	NA	No	No	No	No
ldbr	NM_206300	16.0684	0	0	42	34.505	Yes	No	No	No
CG34248	NM_001104149	0	0	NA	0	NA	No	No	No	No
CG43449	NM_001260110	0	0	NA	1	52.7734	No	No	No	No
CG43112	NM_001259333	0	0	NA	0	NA	No	No	No	No
CG43445	NM_001260245	0	0	NA	0	NA	No	No	No	No
CG43110	NM_001299603	0.0869365	1.56307	17.9795	0	NA	No	No	No	No
CG34247	NM_001104147	0	0	NA	0	NA	No	No	No	No
CG43116	NM_001260379	0	0	NA	0	NA	No	No	No	No
CG34241	NM_001104121	0	0	NA	0	NA	No	No	No	No
CG34242	NM_001104125	23.0334	69.0213	2.99658	81	43.8427	No	No	No	No
CG43115	NM_001258613	0	0	NA	0	NA	No	No	No	No
CG42249	NM_001272509	0.074914	0	0	0	NA	No	No	No	No
mbm	NM_134667	55.8963	15.8192	0.28301	355	49.3148	Yes	Yes	Yes	No
mbo	NM_079606	30.1309	54.6349	1.81325	231	67.8678	Yes	Yes	Yes	No
Sod2	NM_001299574	174.957	521.25	2.97929	642	93.4198	Yes	Yes	Yes	No
Sod3	NM_001316415	281.368	1481.57	5.2656	1545	81.3031	Yes	Yes	Yes	No
sog	NM_001272649	1.03326	1.90538	1.84405	4	45.9081	No	No	No	No
CG42792	NM_001299037	0	0	NA	0	NA	No	No	No	No
CG42790	NM_001276064	0	0	NA	0	NA	No	No	No	No
CG42797	NM_001201643	30.0526	1.21111	0.0402998	266	34.6638	Yes	No	Yes	No
sol	NM_057390	44.275	1.38844	0.0313595	197	70.8069	Yes	No	Yes	No
CG42795	NM_141731	0	0	NA	0	NA	No	No	No	No
mbc	NM_001260338	29.0795	4.15529	0.142894	294	42.5673	Yes	Yes	Yes	No
CG44838	NM_001300078	47.0635	6.29462	0.133747	0	NA	Yes	Yes	No	No
Mp20	NM_057295	0	2.89297	NA	2	53.4214	No	No	No	No
unc-13-4A	NM_001274575	0	0	NA	0	NA	No	No	No	No
mbt	NM_078651	70.9149	5.4688	0.0771177	452	38.9354	Yes	Yes	Yes	No
Pms2	NM_057675	38.5893	11.026	0.285728	309	42.8134	Yes	Yes	Yes	No
CG44836	NM_168665	0	0	NA	0	NA	No	No	No	No
snRNP-U1-C	NM_142510	46.4922	3.76534	0.0809885	385	25.5799	Yes	No	Yes	No
tamo	NM_166664	29.1713	6.54436	0.224343	337	42.0269	Yes	Yes	Yes	No
CG5521	NM_001170277	19.6017	12.4974	0.637569	36	85.3761	Yes	Yes	No	No
CG5522	NM_166195	36.5833	3.19295	0.0872789	191	48.6804	Yes	No	Yes	No
CG5525	NM_135735	190.995	473.02	2.47661	437	77.7462	Yes	Yes	Yes	No
Hand	NM_135526	0	0	NA	0	NA	No	No	No	No
Tpr2	NM_001273572	112.56	154.799	1.37526	516	49.7611	Yes	Yes	Yes	No
alphaSnap	NM_079456	94.9791	158.607	1.66992	542	54.8595	Yes	Yes	Yes	No
HisCl1	NM_169429	0	0	NA	0	NA	No	No	No	No
az2	NM_136445	28.149	3.37402	0.119863	154	37.5036	Yes	No	Yes	No
Axud1	NM_001272999	34.3454	0	0	276	33.1317	Yes	No	Yes	No
Drip	NM_165833	13.464	97.6798	7.25487	55	57.2885	No	Yes	No	No
Grasp65	NM_140903	42.6095	31.7836	0.745929	276	34.1361	Yes	Yes	Yes	No
Prx6005	NM_078739	41.1534	109.748	2.66681	170	47.6348	Yes	Yes	Yes	No
Cpr73D	NM_001316452	0	0	NA	0	NA	No	No	No	No
CG6950	NM_169437	49.4836	80.1673	1.62008	486	69.0884	Yes	Yes	Yes	No
TwdlM	NM_143227	0	0	NA	0	NA	No	No	No	No
TwdlN	NM_170281	0	0	NA	0	NA	No	No	No	No
TwdlO	NM_143230	0	0	NA	0	NA	No	No	No	No
TwdlH	NM_143233	0	0	NA	0	NA	No	No	No	No
TwdlJ	NM_143232	0	0	NA	0	NA	No	No	No	No
TwdlK	NM_143231	0	0	NA	0	NA	No	No	No	No
TwdlD	NM_143235	0	0	NA	2	17.373	No	No	No	No
TwdlE	NM_135313	0	0	NA	0	NA	No	No	No	No
TwdlF	NM_141186	0	0	NA	0	NA	No	No	No	No
TwdlG	NM_001300226	0.154873	0	0	0	NA	No	No	No	No
TwdlB	NM_143229	0	0	NA	0	NA	No	No	No	No
TwdlC	NM_143262	0	0	NA	0	NA	No	No	No	No
ND-42	NM_169990	99.7713	210.307	2.10789	115	80.261	Yes	Yes	Yes	No
TwdlY	NM_167540	0	0	NA	0	NA	No	No	No	No
TwdlZ	NM_167541	0	0	NA	0	NA	No	No	No	No
CG14153	NM_140147	0	0	NA	0	NA	No	No	No	No
TwdlV	NM_141189	0	0	NA	0	NA	No	No	No	No
TwdlW	NM_142349	0	0	NA	0	NA	No	No	No	No
TwdlP	NM_143228	0	0	NA	0	NA	No	No	No	No
TwdlQ	NM_143239	0	0	NA	0	NA	No	No	No	No
CG14154	NM_168418	0	0	NA	0	NA	No	No	No	No
ND-49	NM_001272135	63.5024	243.312	3.83155	303	74.779	Yes	Yes	Yes	No
CG15209	NM_132426	0.309353	18.54	59.9315	7	52.6352	No	No	No	No
CG15208	NM_001298170	0	0	NA	0	NA	No	No	No	No
up	NM_001298285	0.327355	1.30792	3.99543	1	77.4002	No	No	No	No
CG15201	NM_132463	0	0	NA	1	-10.7749	No	No	No	No
CG15200	NM_132469	0	0	NA	0	NA	No	No	No	No
CG15203	NM_001298176	0	0	NA	0	NA	No	No	No	No
CG15202	NM_001258689	1.63604	0	0	0	NA	No	No	No	No
CG18324	NM_137091	3.76735	0	0	22	34.5701	No	No	No	No
CG18635	NM_137423	0.3849	0.384461	0.998858	0	NA	No	No	No	No
Gos28	NM_142482	58.5949	1.12554	0.0192088	246	36.7982	Yes	No	Yes	No
Sid	NM_143370	0.114661	0.687183	5.99315	3	101.761	No	No	No	No
AdoR	NM_143515	0	0	NA	0	NA	No	No	No	No
Sin	NM_001170015	22.8534	2.07521	0.0908053	146	28.4813	Yes	No	Yes	No
CG31908	NM_001298770	61.1044	11.6462	0.190595	394	46.8633	Yes	Yes	Yes	No
CG31909	NM_001169429	0	0	NA	0	NA	No	No	No	No
rols	NM_168487	0.0646834	0	0	0	NA	No	No	No	No
CG31904	NM_164768	0	0	NA	0	NA	No	No	No	No
CG3209	NM_001299889	54.708	60.2502	1.10131	552	47.2	Yes	Yes	Yes	No
CG31907	NM_001298776	0	0	NA	0	NA	No	No	No	No
eloF	NM_141699	0	0	NA	2	33.384	No	No	No	No
Rbp1-like	NM_001201656	13.6989	15.7884	1.15253	493	45.1458	No	Yes	Yes	No
Acyp	NM_001298987	0	0	NA	0	NA	No	No	No	No
CG33051	NM_176344	6.44784	2.49309	0.386655	96	28.8138	No	No	No	No
CG33052	NM_176345	38.9477	12.8419	0.32972	140	42.0968	Yes	Yes	Yes	No
CG33506	NM_001014528	53.5333	56.0058	1.04619	174	68.1628	Yes	Yes	Yes	No
Als2	NM_141090	23.6807	2.48405	0.104898	165	39.6284	Yes	Yes	Yes	No
CG33509	NM_001014494	0	0	NA	0	NA	No	No	No	No
Dgp-1	NM_137458	25.6207	10.8081	0.421848	173	54.2867	Yes	Yes	Yes	No
fd96Ca	NM_001300587	0	0	NA	0	NA	No	No	No	No
CG43084	NM_001259844	0	0	NA	0	NA	No	No	No	No
CG4500	NM_135852	0	0	NA	0	NA	No	No	No	No
Idh	NM_168265	267.062	523.61	1.96063	947	84.0287	Yes	Yes	Yes	No
RacGAP84C	NM_057356	0	0	NA	0	NA	No	No	No	No
Ide	NM_079458	23.3512	53.23	2.27954	98	63.204	Yes	Yes	No	No
CG3061	NM_142071	73.1539	107.2	1.46541	407	58.1768	Yes	Yes	Yes	No
CG30010	NM_001273907	17.182	4.82693	0.280929	97	39.1881	No	No	No	No
CG3065	NM_138017	40.6988	5.06834	0.124533	321	50.892	Yes	No	Yes	No
CG6984	NM_137343	26.5492	18.0811	0.68104	115	46.864	Yes	Yes	Yes	No
Pxt	NM_142391	322.329	947.776	2.9404	780	130.894	Yes	Yes	Yes	No
Pxn	NM_206254	0	0	NA	0	NA	No	No	No	No
otk2	NM_138561	5.54908	0.583447	0.105143	60	18.9399	No	No	No	No
Dsor1	NM_078543	62.4914	74.9041	1.19863	296	56.6552	Yes	Yes	Yes	No
CG43083	NM_001259843	0	0	NA	0	NA	No	No	No	No
Pxd	NM_206501	0	0	NA	0	NA	No	No	No	No
CG12006	NM_139575	48.1282	4.01851	0.0834959	577	31.1608	Yes	No	Yes	No
CG12007	NM_141255	19.8531	0.487634	0.0245621	123	23.0991	Yes	No	Yes	No
CG12004	NM_001299970	67.9826	79.7258	1.17274	32	43.727	Yes	Yes	No	No
RpII33	NM_058071	50.916	53.5181	1.05111	285	55.3929	Yes	Yes	Yes	No
CG12003	NM_139368	0	0	NA	0	NA	No	No	No	No
osp	NM_001169504	16.3003	3.76938	0.231247	190	40.1336	Yes	Yes	Yes	No
CG12009	NM_139542	0.182736	0.821374	4.49486	0	NA	No	No	No	No
eIF2B-alpha	NM_143495	36.3836	45.2878	1.24473	149	47.3932	Yes	Yes	Yes	No
osk	NM_206464	307.362	40.9109	0.133103	1397	60.5328	Yes	Yes	Yes	No
Nf1	NM_001276049	8.22124	9.90683	1.20503	98	65.452	Yes	Yes	No	No
osa	NM_079668	71.4369	24.8872	0.34838	482	38.2964	Yes	Yes	Yes	No
pes	NM_164777	100.491	148.984	1.48256	570	66.1456	Yes	Yes	Yes	No
ver	NM_140330	11.6764	14.7323	1.26172	90	43.2665	No	No	No	No
pelo	NM_057634	40.5926	8.98651	0.221383	137	73.6626	Yes	Yes	Yes	No
tef	NM_079042	95.9043	0	0	590	32.3395	Yes	No	Yes	No
Kal1	NM_142963	3.27047	8.12701	2.48496	41	81.0005	No	Yes	No	No
CG10352	NM_001272539	0	0	NA	0	NA	No	No	No	No
CG10353	NM_167312	10.1437	10.813	1.06598	8	109.053	Yes	Yes	No	No
CG10357	NM_139564	0	0	NA	0	NA	No	No	No	No
CG6785	NM_135694	0.731603	0	0	5	50.9774	No	No	No	No
CG12263	NM_137488	21.5519	39.2309	1.8203	96	76.5254	Yes	Yes	No	No
CkIIalpha-i3	NM_001299961	11.3789	4.59006	0.403385	75	40.095	Yes	No	No	No
CG12264	NM_135689	44.4211	58.9181	1.32635	264	77.1091	Yes	Yes	Yes	No
CG9471	NM_141686	58.4617	90.5013	1.54805	533	42.9232	Yes	Yes	Yes	No
unc79	NM_142538	0	0	NA	0	NA	No	No	No	No
Ubc84D	NM_079536	0.295837	0	0	0	NA	No	No	No	No
CG12269	NM_001260259	0	0	NA	0	NA	No	No	No	No
CG6788	NM_133026	0	0	NA	0	NA	No	No	No	No
CG5326	NM_142803	0.310931	0	0	4	58.283	No	No	No	No
CG5321	NM_132739	0	1.22563	NA	0	NA	No	No	No	No
mahj	NM_001259522	35.994	18.4809	0.513446	288	46.2432	Yes	Yes	Yes	No
CG8870	NM_169517	0	0	NA	0	NA	No	No	No	No
CG1529	NM_134577	38.3981	0.871689	0.0227013	130	30.7801	Yes	No	Yes	No
CG8878	NM_206099	46.6164	4.43459	0.0951294	215	44.1159	Yes	Yes	Yes	No
CG1835	NM_134560	2.08605	0	0	0	NA	No	No	No	No
Taz	NM_058084	69.5204	25.5364	0.367322	806	46.085	Yes	Yes	Yes	No
CG1523	NM_143378	26.914	23.3302	0.86684	206	32.3294	Yes	Yes	Yes	No
CG45116	NM_001300218	0	0	NA	0	NA	No	No	No	No
CG2336	NM_169148	0	0	NA	0	NA	No	No	No	No
CG7789	NM_143471	40.7216	120.767	2.96568	154	72.1938	Yes	Yes	Yes	No
CG7786	NM_137257	0	0	NA	0	NA	No	No	No	No
Sec61gamma	NM_001298521	218.151	446.66	2.04748	1447	42.0542	Yes	Yes	Yes	No
E(spl)m7-HLH	NM_080505	0	0	NA	0	NA	No	No	No	No
Tao	NM_001201743	165.438	4.04498	0.0244501	1352	32.3907	Yes	Yes	Yes	No
CG7781	NM_001298816	0	0	NA	1	121.119	No	No	No	No
sced	NM_136375	52.3012	6.64343	0.127022	441	46.5543	Yes	Yes	Yes	No
Mat89Ba	NM_142273	26.6753	28.7475	1.07768	55	40.3531	Yes	Yes	No	No
CG6439	NM_142743	75.6765	94.144	1.24403	153	61.3577	Yes	Yes	Yes	No
CG6435	NM_137321	0	0	NA	0	NA	No	No	No	No
boca	NM_165541	55.3798	85.9383	1.5518	148	47.0446	Yes	Yes	Yes	No
CG6431	NM_135598	0	0	NA	211	34.7078	No	No	Yes	No
CG14196	NM_133139	0	0	NA	0	NA	No	No	No	No
M6	NM_001275237	7.95654	29.7166	3.73486	73	49.2587	No	Yes	No	No
ATPsynepsilonL	NM_001104266	0	0	NA	0	NA	No	No	No	No
CG14194	NM_133132	45.8107	5.69017	0.12421	318	30.1369	Yes	No	Yes	No
CG1789	NM_132276	49.7452	7.70079	0.154805	182	37.4814	Yes	No	Yes	No
CG14195	NM_001298501	0	0	NA	0	NA	No	No	No	No
CG6195	NM_142565	59.4219	90.4331	1.52188	335	54.8727	Yes	Yes	Yes	No
Six4	NM_140999	0.431833	0	0	2	100.712	No	No	No	No
CG1785	NM_132274	55.8896	13.6931	0.245003	302	46.4777	Yes	Yes	Yes	No
melt	NM_001274566	1.87259	3.49152	1.86454	5	61.3033	No	Yes	No	No
CG11007	NM_001299688	97.3807	164.977	1.69414	780	44.9277	Yes	Yes	Yes	No
CG17378	NM_135229	0	0	NA	0	NA	No	No	No	No
CG11000	NM_001260007	1.28435	0	0	10	48.1828	No	No	No	No
Mf	NM_001300405	1.17953	0	0	0	NA	No	No	No	No
Rpt4R	NM_001300110	0	0	NA	0	NA	No	No	No	No
CG6847	NM_001298468	0.0825499	0	0	1	25.3048	No	No	No	No
Gr36a	NM_165205	0	0	NA	0	NA	No	No	No	No
Gr36c	NM_165207	0	0	NA	0	NA	No	No	No	No
ATPsyngamma	NM_170425	251.28	570.359	2.26982	999	91.5776	Yes	Yes	Yes	No
CG13407	NM_142752	0	0	NA	0	NA	No	No	No	No
Grip128	NM_132802	42.8428	24.2059	0.564993	154	58.1443	Yes	Yes	Yes	No
endos	NM_001274891	258.711	695.13	2.6869	776	106.265	Yes	Yes	Yes	No
Mp	NM_001300031	0.206148	2.16208	10.488	2	58.2304	No	No	No	No
Ms	NM_001300574	0	0	NA	0	NA	No	No	No	No
Obp83g	NM_169126	0	0	NA	0	NA	No	No	No	No
Obp83a	NM_001300260	0	0	NA	0	NA	No	No	No	No
Obp83b	NM_079518	0	0	NA	0	NA	No	No	No	No
RNaseX25	NM_079242	61.5992	69.2692	1.12451	518	37.4962	Yes	Yes	Yes	No
Cby	NM_142732	0	0	NA	0	NA	No	No	No	No
CG4497	NM_001201778	45.4065	0.993168	0.0218728	430	35.6186	Yes	No	Yes	No
CG4496	NM_001298779	5.39951	0	0	25	36.3299	No	No	No	No
CG4495	NM_001103640	28.2378	77.4457	2.74263	298	52.4301	Yes	Yes	Yes	No
CG30355	NM_165617	0	0	NA	0	NA	No	No	No	No
eIF-2alpha	NM_001298400	158.85	87.5672	0.551257	827	44.6295	Yes	Yes	Yes	No
eEF1delta	NM_135517	336.24	1036.44	3.08245	2311	63.3752	Yes	Yes	Yes	No
Cbp80	NM_080011	57.964	8.69244	0.149963	507	34.1438	Yes	Yes	Yes	No
phtf	NM_136388	30.8825	8.45131	0.27366	178	47.7491	Yes	Yes	Yes	No
Myd88	NM_001273892	25.016	2.33528	0.0933513	168	30.2932	Yes	No	Yes	No
Or42b	NM_078900	0	0	NA	0	NA	No	No	No	No
CG17982	NM_001298078	14.2389	0	0	24	29.1824	Yes	No	No	No
Or42a	NM_078898	0.104086	0	0	0	NA	No	No	No	No
thetaTry	NM_078969	0	0	NA	0	NA	No	No	No	No
CG13409	NM_142747	0	0	NA	0	NA	No	No	No	No
PRL-1	NM_001273558	177.886	60.7464	0.34149	554	48.0273	Yes	Yes	Yes	No
Sfp24Bc	NM_001169391	0	0	NA	0	NA	No	No	No	No
SP2353	NM_001299545	0	0	NA	0	NA	No	No	No	No
CG16957	NM_135806	0.230406	0	0	1	32.4129	No	No	No	No
Syx8	NM_079389	26.856	7.87878	0.293371	106	45.5587	Yes	No	Yes	No
RpI12	NM_079715	27.2586	30.3392	1.11301	310	29.815	No	No	Yes	No
DOR	NM_168084	5.90825	10.4916	1.77575	57	47.5997	No	Yes	No	No
Syx5	NM_134305	72.1048	21.5798	0.299283	398	42.0811	Yes	Yes	Yes	No
Syx6	NM_206092	47.7229	20.5991	0.43164	482	33.7093	Yes	Yes	Yes	No
Syx7	NM_168906	68.1885	59.4254	0.871487	322	57.8603	Yes	Yes	Yes	No
SWIP	NM_132888	9.79867	0.896564	0.0914985	56	35.7707	Yes	No	No	No
CG17186	NM_142582	28.2471	0	0	178	28.0477	Yes	No	Yes	No
CG17187	NM_141799	17.4941	6.87506	0.392993	20	29.3586	Yes	No	No	No
CG17180	NM_138193	10.5	0.850378	0.0809885	82	30.4047	No	No	No	No
CG4950	NM_001275005	0	0	NA	0	NA	No	No	No	No
CG10822	NM_137606	0	0	NA	0	NA	No	No	No	No
La	NM_057666	169.532	39.6785	0.234047	1010	33.5712	Yes	Yes	Yes	No
CG17189	NM_143277	0	0	NA	0	NA	No	No	No	No
Pop2	NM_168484	126.573	171.205	1.35262	179	72.6392	Yes	Yes	Yes	No
CG44335	NM_001300280	0	0	NA	0	NA	No	No	No	No
CanA1	NM_001260449	0	0	NA	0	NA	No	No	No	No
CG34051	NM_001038827	0	0	NA	0	NA	No	No	No	No
Iris	NM_134726	0.236517	0.472494	1.99772	2	63.0272	No	No	No	No
CG6893	NM_140796	0	0	NA	0	NA	No	No	No	No
CG31759	NM_165001	13.5592	15.542	1.14623	138	46.9611	Yes	Yes	Yes	No
CG34054	NM_001038851	0.559106	0	0	0	NA	No	No	No	No
CG34057	NM_001038891	0.11973	0	0	0	NA	No	No	No	No
CG34056	NM_001038890	0	0	NA	1	140.127	No	No	No	No
CG43659	NM_001274221	0	0	NA	0	NA	No	No	No	No
CG43658	NM_001272714	19.9225	7.80098	0.391567	93	63.1459	Yes	Yes	No	No
CG31751	NM_165260	9.21224	17.5945	1.90991	37	78.9805	Yes	Yes	No	No
CG31750	NM_165208	0	0	NA	0	NA	No	No	No	No
CG31021	NM_170513	0	1.67029	NA	0	NA	No	No	No	No
Lk	NM_080154	0	0	NA	0	NA	No	No	No	No
CG4009	NM_001275726	973.412	4126.03	4.23873	5748	58.9631	Yes	Yes	Yes	No
CG4004	NM_132596	18.4837	0	0	143	39.4649	Yes	No	Yes	No
CG4000	NM_142649	0	0	NA	0	NA	No	No	No	No
CG12934	NM_001299361	0	0	NA	0	NA	No	No	No	No
CG4650	NM_135878	0	0	NA	0	NA	No	No	No	No
CG42658	NM_001201753	0	0	NA	0	NA	No	No	No	No
CG42659	NM_001201906	0	0	NA	0	NA	No	No	No	No
Rim2	NM_001258911	16.8526	9.24652	0.548669	141	35.4865	Yes	No	Yes	No
CG17239	NM_001272991	0.174871	4.19211	23.9726	3	35.2504	No	No	No	No
CG10516	NM_140562	8.59046	5.96915	0.694858	56	39.7886	No	No	No	No
CG17237	NM_134822	0	0	NA	0	NA	No	No	No	No
CG17234	NM_164470	0.172642	0	0	1	72.7188	No	No	No	No
CG42656	NM_001202263	0	0	NA	1	4.46601	No	No	No	No
CG17233	NM_001259911	54.2241	1.68119	0.0310044	318	25.8798	Yes	No	Yes	No
CG17230	NM_001300360	17.4959	17.0578	0.974962	48	67.7659	Yes	Yes	No	No
CG42655	NM_001202204	0	0	NA	0	NA	No	No	No	No
Nse4	NM_135561	37.0246	61.2428	1.65411	122	45.5797	Yes	Yes	Yes	No
Ir93a	NM_142667	0	0	NA	0	NA	No	No	No	No
Nse1	NM_001273216	49.8284	25.5333	0.512425	240	33.7001	Yes	Yes	Yes	No
CG14527	NM_143388	0	0.355809	NA	0	NA	No	No	No	No
CG14526	NM_143389	4.81898	14.0882	2.92349	21	53.4135	No	Yes	No	No
CG8765	NM_140884	31.3298	0	0	199	41.7926	Yes	No	Yes	No
CG14529	NM_143384	0	0	NA	0	NA	No	No	No	No
CG14528	NM_143386	0	0	NA	0	NA	No	No	No	No
Tusp	NM_001202374	0.0286856	0	0	0	NA	No	No	No	No
CG10631	NM_136154	15.8183	0	0	133	42.3172	Yes	No	Yes	No
His1:CG33804	NM_001032115	0	0	NA	1	82.2135	No	No	No	No
CG10635	NM_139704	186.315	423.954	2.27547	647	47.6574	Yes	Yes	Yes	No
CG10639	NM_136079	15.6287	6.65076	0.425549	104	70.52	Yes	No	Yes	No
CG10638	NM_001300121	52.4483	117.975	2.24936	153	68.4846	Yes	Yes	Yes	No
CG18764	NM_144455	10.5358	0	0	52	30.1884	Yes	No	No	No
CG12857	NM_137143	0	0	NA	0	NA	No	No	No	No
CG12851	NM_001299937	0.152547	0	0	0	NA	No	No	No	No
CG12853	NM_144120	0	0	NA	0	NA	No	No	No	No
CG12858	NM_001259394	0.0544372	0.326251	5.99315	3	37.4773	No	No	No	No
nahoda	NM_001259545	0.645843	9.89163	15.3158	6	52.9624	No	Yes	No	No
Obp22a	NM_164447	0	0	NA	0	NA	No	No	No	No
skd	NM_168879	53.4876	20.5847	0.384849	260	60.045	Yes	Yes	Yes	No
Prosalpha4T1	NM_142653	0	0	NA	0	NA	No	No	No	No
Prosalpha4T2	NM_001299915	2.23484	0	0	0	NA	No	No	No	No
fd64A	NM_001259680	0	0	NA	0	NA	No	No	No	No
CG15461	NM_144034	0	0	NA	0	NA	No	No	No	No
Mhc	NM_165190	0.0634708	0	0	1	20.3882	No	No	No	No
spok	NM_001110990	0	0	NA	0	NA	No	No	No	No
CG10189	NM_001273656	5.42639	0	0	27	40.3224	No	No	No	No
CG10188	NM_165305	29.3404	6.2128	0.211749	309	31.6065	Yes	Yes	Yes	No
CG32599	NM_167398	0	0	NA	0	NA	No	No	No	No
CG10185	NM_142264	0	0	NA	0	NA	No	No	No	No
CG32225	NM_168843	0	0	NA	0	NA	No	No	No	No
CG10186	NM_001144370	0	0	NA	0	NA	No	No	No	No
CG32221	NM_168820	11.7103	2.92424	0.249715	145	18.5182	Yes	No	Yes	No
CG32590	NM_167414	17.4815	8.73078	0.499429	134	31.3905	No	No	Yes	No
CG32591	NM_001298327	0.107958	0	0	0	NA	No	No	No	No
dyl	NM_168078	0.0682447	0	0	0	NA	No	No	No	No
CG7208	NM_142426	124.691	33.6366	0.269759	515	36.0016	Yes	Yes	Yes	No
ss	NM_057400	0.0467889	0	0	0	NA	No	No	No	No
sr	NM_001300455	0.0456327	0	0	0	NA	No	No	No	No
CG7201	NM_001274645	0	0	NA	0	NA	No	No	No	No
CG7200	NM_001299102	24.4167	3.5691	0.146174	152	29.31	Yes	No	Yes	No
wun2	NM_001299319	95.2502	61.3134	0.643709	517	36.5631	Yes	Yes	Yes	No
CG7206	NM_001258799	19.2601	0	0	265	41.9243	No	No	Yes	No
NijC	NM_001104291	0.675263	0	0	1	69.8652	No	No	No	No
st	NM_079384	0	0	NA	0	NA	No	No	No	No
Gpo-1	NM_001103862	3.3841	3.09378	0.914209	39	69.9705	No	No	No	No
so	NM_057385	0.304459	0	0	0	NA	No	No	No	No
sn	NM_167143	71.7885	76.0401	1.05922	364	52.0068	Yes	Yes	Yes	No
sm	NM_001259500	14.8085	27.7951	1.87698	79	57.8526	Yes	Yes	No	No
sl	NM_057378	19.0768	7.38257	0.386992	147	63.2426	Yes	Yes	Yes	No
sc	NM_057455	0	0	NA	0	NA	No	No	No	No
sa	NM_141054	0	0	NA	0	NA	No	No	No	No
E(spl)m3-HLH	NM_079785	0	0	NA	0	NA	No	No	No	No
se	NM_139978	0.178717	0	0	0	NA	No	No	No	No
CG10283	NM_001169535	2.39208	2.66718	1.115	6	87.2536	No	No	No	No
Snap24	NM_079574	49.6645	0	0	404	36.4254	Yes	No	Yes	No
tty	NM_167744	2.00091	1.786	0.892597	12	34.4662	No	No	No	No
Rad23	NM_001272123	295.992	82.5223	0.278799	3047	25.6192	Yes	Yes	Yes	No
ttv	NM_001274042	28.0559	0.327127	0.0116598	211	44.7794	Yes	No	Yes	No
Ance-4	NM_001299294	0	0	NA	0	NA	No	No	No	No
Ance-5	NM_133164	0	0	NA	1	54.0305	No	No	No	No
tth	NM_001298287	66.5096	11.8104	0.177575	267	54.1771	Yes	Yes	Yes	No
CG15696	NM_142664	0	0	NA	0	NA	No	No	No	No
Ance-2	NM_176028	0	0	NA	2	115.36	No	No	No	No
CG15695	NM_142663	0.0572768	1.37307	23.9726	2	113.971	No	No	No	No
CG32040	NM_168326	0.136642	0	0	0	NA	No	No	No	No
KrT95D	NM_079749	28.9819	4.20055	0.144937	279	46.6517	Yes	Yes	Yes	No
CG33276	NM_206296	19.9968	34.241	1.71233	22	24.1339	No	No	No	No
CG11583	NM_001038900	63.7479	41.4961	0.650941	400	46.2067	Yes	Yes	Yes	No
CG11581	NM_001298306	0	0	NA	0	NA	No	No	No	No
CG11586	NM_139624	35.3125	27.3075	0.77331	212	50.3687	Yes	Yes	Yes	No
MFS1	NM_166564	0	0	NA	0	NA	No	No	No	No
CG11584	NM_132713	0	0	NA	1	-11.6194	No	No	No	No
MFS3	NM_134728	0	0	NA	0	NA	No	No	No	No
CG11588	NM_001274800	0	0	NA	0	NA	No	No	No	No
jim	NM_143699	0.404094	0.302725	0.749144	7	69.6911	No	No	No	No
MFS9	NM_169898	0	0	NA	0	NA	No	No	No	No
CG13724	NM_140709	0	0	NA	0	NA	No	No	No	No
CG13725	NM_140710	0	0	NA	0	NA	No	No	No	No
CG13727	NM_140712	0	0	NA	0	NA	No	No	No	No
CG13720	NM_139656	0	0	NA	0	NA	No	No	No	No
CG13721	NM_139655	0	0	NA	0	NA	No	No	No	No
CG13722	NM_139654	0	0	NA	0	NA	No	No	No	No
CG13723	NM_140707	0	0	NA	1	74.8057	No	No	No	No
Srp19	NM_057787	68.402	107.969	1.57844	346	64.6147	Yes	Yes	Yes	No
CG13728	NM_140717	0.0551017	0	0	0	NA	No	No	No	No
djl	NM_141429	0	0	NA	0	NA	No	No	No	No
CNT1	NM_136603	0	0	NA	0	NA	No	No	No	No
Dnz1	NM_058101	40.2642	1.87061	0.0464585	325	37.7961	Yes	No	Yes	No
CCDC151	NM_140263	0	0	NA	0	NA	No	No	No	No
CG15073	NM_137518	9.28716	2.58881	0.278751	43	33.0244	Yes	No	No	No
MTF-1	NM_001104090	17.4356	2.95042	0.169218	181	43.6462	Yes	No	Yes	No
CG2224	NM_001276179	17.1825	18.0662	1.05143	108	42.0347	Yes	Yes	Yes	No
nonA-l	NM_001275717	33.5961	0	0	320	19.6338	Yes	No	Yes	No
Glycogenin	NM_001259517	33.6949	26.2198	0.778154	276	47.3454	Yes	Yes	Yes	No
CG9319	NM_001273709	20.2384	6.81413	0.336694	123	44.4218	Yes	No	Yes	No
CG9649	NM_142086	0	0	NA	0	NA	No	No	No	No
CG9313	NM_001299727	0	0	NA	0	NA	No	No	No	No
CG9312	NM_142056	0	0	NA	0	NA	No	No	No	No
Obp59a	NM_176249	0	0	NA	0	NA	No	No	No	No
CG9646	NM_137339	27.4474	0.278807	0.0101579	226	55.9441	Yes	No	Yes	No
CG9317	NM_136208	0	0	NA	0	NA	No	No	No	No
CG9640	NM_001274110	0.602114	0	0	6	106.193	No	No	No	No
CG9643	NM_001298643	38.164	20.3575	0.533422	244	34.6395	Yes	Yes	Yes	No
CG9314	NM_001273339	0	0	NA	0	NA	No	No	No	No
cbs	NM_137031	33.0304	0.818001	0.0247651	299	28.2792	Yes	No	Yes	No
bonsai	NM_137847	86.0726	127.119	1.47688	374	45.5366	Yes	Yes	Yes	No
Sec71	NM_135831	17.2207	10.856	0.630403	136	20.241	Yes	Yes	Yes	No
ND-B14	NM_001273948	99.3832	184.304	1.85448	440	64.3931	Yes	Yes	Yes	No
mRpL11	NM_079627	50.241	124.221	2.47251	241	48.8	Yes	Yes	Yes	No
CG8993	NM_139459	67.8568	28.9106	0.426053	579	31.1871	Yes	Yes	Yes	No
intr	NM_143376	0	0	NA	0	NA	No	No	No	No
CG8997	NM_001298983	0	0	NA	0	NA	No	No	No	No
su(r)	NM_167182	0.240089	0.239815	0.998858	2	55.7743	No	No	No	No
Dll	NM_079133	0	0	NA	1	18.1258	No	No	No	No
CG13562	NM_138005	1.49803	0	0	13	43.1566	No	No	No	No
blanks	NM_139709	0.131768	0	0	1	19.8314	No	No	No	No
AdamTS-A	NM_206496	1.33619	0.8736	0.653798	22	80.0761	No	No	No	No
CycD	NM_167473	115.192	1.5834	0.0137458	851	36.0239	Yes	No	Yes	No
GCS2beta	NM_136000	53.1196	292.282	5.50233	219	99.097	Yes	Yes	Yes	No
CG31191	NM_001104380	0	0	NA	1	53.1355	No	No	No	No
CG7804	NM_001274945	0.403148	0	0	0	NA	No	No	No	No
CG6337	NM_001299466	0	0	NA	0	NA	No	No	No	No
CG6330	NM_143258	21.2134	8.81861	0.41571	73	54.2989	Yes	No	No	No
CG6332	NM_142742	0	0	NA	0	NA	No	No	No	No
CG6333	NM_001169988	0	0	NA	0	NA	No	No	No	No
nst	NM_140331	42.9645	7.30475	0.170018	182	36.6508	Yes	Yes	Yes	No
blw	NM_166554	448.376	857.593	1.91266	3474	94.6352	Yes	Yes	Yes	No
CG6401	NM_001299618	13.2407	13.138	0.992243	78	45.6858	Yes	Yes	No	No
blp	NM_001300420	41.1686	27.1985	0.660662	218	36.8841	Yes	Yes	Yes	No
Su(P)	NM_079392	64.5869	72.1981	1.11784	469	48.0688	Yes	Yes	Yes	No
Mob4	NM_001259222	107.659	13.826	0.128425	638	38.9288	Yes	No	Yes	No
Muc26B	NM_144295	0.0892277	5.34755	59.9315	1	100.929	No	No	No	No
CG31446	NM_001275681	0	0	NA	0	NA	No	No	No	No
CG4797	NM_166625	0.549739	0	0	0	NA	No	No	No	No
Prx3	NM_079663	120.955	262.079	2.16675	400	63.4913	Yes	Yes	Yes	No
CG4793	NM_165139	0.363429	1.08904	2.99658	3	88.452	No	No	No	No
CheB53b	NM_001014531	0	0	NA	0	NA	No	No	No	No
CheB53a	NM_001014530	0	0	NA	0	NA	No	No	No	No
CG17751	NM_142559	0	0	NA	0	NA	No	No	No	No
CG8483	NM_142007	0	0	NA	0	NA	No	No	No	No
CG17754	NM_001298117	24.137	4.79524	0.198668	154	38.3397	Yes	No	Yes	No
l(1)G0045	NM_132008	16.8534	6.36706	0.377792	134	40.6588	Yes	Yes	Yes	No
flfl	NM_142047	77.324	1.01737	0.0131573	393	29.8676	Yes	No	Yes	No
Mes-4	NM_170360	95.8038	6.03841	0.0630289	1050	36.9958	Yes	Yes	Yes	No
RpL9	NM_001298897	1743.44	181.571	0.104145	6257	69.4383	Yes	Yes	Yes	No
CG11999	NM_141270	66.7224	96.0192	1.43908	280	39.8269	Yes	Yes	Yes	No
CG5660	NM_001300059	11.3787	1.74219	0.15311	116	25.7417	Yes	No	Yes	No
eIF-5A	NM_138034	2339.91	1394.7	0.596048	23006	59.6789	Yes	Yes	Yes	No
Nup214	NM_143782	39.9493	76.8392	1.92342	174	47.6736	Yes	Yes	Yes	No
Wnt10	NM_135265	0	0	NA	0	NA	No	No	No	No
phr6-4	NM_057840	54.7049	0.464383	0.00848888	569	30.1866	Yes	No	Yes	No
BG642167	NM_001043293	0	0	NA	0	NA	No	No	No	No
Ptp4E	NM_001169198	25.4488	9.73225	0.382425	261	31.3268	Yes	Yes	Yes	No
lectin-21Cb	NM_134695	0	0	NA	0	NA	No	No	No	No
lectin-21Ca	NM_144385	0	0	NA	0	NA	No	No	No	No
CG13658	NM_143117	0	0	NA	0	NA	No	No	No	No
Amun	NM_167299	168.343	35.0883	0.208434	1246	40.6905	Yes	Yes	Yes	No
TrpA1	NM_001274671	0	0	NA	0	NA	No	No	No	No
2016-09-02	NM_001275835	69.2609	31.8213	0.459441	420	27.1566	Yes	Yes	Yes	No
2016-09-04	NM_167532	21.7299	0	0	154	21.6881	Yes	No	Yes	No
2016-09-05	NM_143704	20.9974	5.99241	0.285388	81	43.3519	Yes	No	No	No
Rrp47	NM_001298381	60.659	61.1561	1.00819	385	47.5152	Yes	Yes	Yes	No
Hmx	NM_001300447	0	0	NA	0	NA	No	No	No	No
CG5150	NM_001300015	0	0	NA	0	NA	No	No	No	No
robl62A	NM_138266	0	0	NA	2	41.1025	No	No	No	No
CG9861	NM_137934	0	0	NA	0	NA	No	No	No	No
Hmu	NM_057811	90.368	53.1648	0.588314	1135	38.2647	Yes	Yes	Yes	No
CG9863	NM_137936	0	0	NA	0	NA	No	No	No	No
CG9864	NM_001274171	30.2	162.569	5.38307	246	68.9174	Yes	Yes	Yes	No
Hmr	NM_132409	19.597	0	0	146	35.9199	Yes	No	Yes	No
Bug22	NM_135558	43.657	25.2346	0.57802	217	47.5926	Yes	Yes	Yes	No
Hml	NM_079336	0	0	NA	0	NA	No	No	No	No
CG1647	NM_143379	24.3837	0.807378	0.0331113	126	33.8532	Yes	No	Yes	No
CG1646	NM_001104488	18.2493	36.1224	1.97939	61	58.0495	Yes	Yes	No	No
CG1317	NM_139458	22.48	21.2857	0.946873	237	35.8555	Yes	Yes	Yes	No
CG1640	NM_167369	113.72	118.586	1.04279	734	38.3177	Yes	Yes	Yes	No
CG1315	NM_001275395	0	0	NA	0	NA	No	No	No	No
CG8195	NM_137205	25.7834	7.86666	0.305106	149	50.9954	Yes	Yes	Yes	No
CG8199	NM_141648	28.1199	9.77801	0.347725	133	22.0598	Yes	Yes	Yes	No
CG1648	NM_001299324	0.947784	3.40813	3.59589	9	46.4339	No	No	No	No
vfl	NM_001258840	85.3375	16.1451	0.189191	28	47.919	Yes	Yes	No	No
CG34266	NM_001104037	0	0	NA	0	NA	No	No	No	No
Dscam3	NM_001104355	0	0	NA	1	9.08125	No	No	No	No
CG34264	NM_001144392	0	0	NA	0	NA	No	No	No	No
Dscam1	NM_001273835	0	0.882521	NA	1	32.1744	No	No	No	No
CG34263	NM_001103989	0.585986	0	0	3	52.4675	No	No	No	No
CG34260	NM_001275191	0	0	NA	0	NA	No	No	No	No
CG34261	NM_001104186	30.0875	57.0396	1.89579	141	79.9266	Yes	Yes	Yes	No
CG34268	NM_001103995	0	0	NA	0	NA	No	No	No	No
CG34269	NM_001103996	0.463441	0	0	0	NA	No	No	No	No
AlkB	NM_206735	18.6231	22.3222	1.19863	131	38.9531	Yes	Yes	Yes	No
CG32816	NM_001297808	5.49436	27.5524	5.01468	26	36.951	No	Yes	No	No
Rh3	NM_079687	0	0	NA	0	NA	No	No	No	No
CG44812	NM_001299909	0	0	NA	0	NA	No	No	No	No
san	NM_080040	197.912	284.958	1.43982	762	87.2082	Yes	Yes	Yes	No
Rh5	NM_001298930	0	0	NA	0	NA	No	No	No	No
CG32812	NM_130543	0.194084	0	0	0	NA	No	No	No	No
CG5543	NM_137988	24.0211	16.7575	0.697615	236	46.0621	Yes	Yes	Yes	No
CG5541	NM_206715	58.7627	31.0261	0.52799	269	61.8431	Yes	Yes	Yes	No
EcR	NM_001169590	25.8658	0.564728	0.021833	251	33.3306	Yes	No	Yes	No
sas	NM_001275408	0.0968879	0.580664	5.99315	0	NA	No	No	No	No
CG31997	NM_001297780	3.68418	0	0	18	44.9418	No	No	No	No
scrib	NM_001170275	24.1936	2.17967	0.0900931	11	94.2903	Yes	Yes	No	No
CG5549	NM_137992	0	0	NA	0	NA	No	No	No	No
sav	NM_176544	34.0208	3.28858	0.0966637	291	30.9543	Yes	No	Yes	No
sau	NM_001014460	69.1898	98.8547	1.42875	370	50.436	Yes	Yes	Yes	No
CG8736	NM_136550	0.275758	0	0	7	78.6647	No	No	No	No
CG34191	NM_001103884	83.7247	443.747	5.30006	596	45.704	Yes	Yes	Yes	No
CG8735	NM_001299272	80.4178	122.62	1.52479	132	68.3129	Yes	Yes	Yes	No
CG43795	NM_001103965	0.0289307	0	0	0	NA	No	No	No	No
CG34196	NM_001103894	0	0	NA	0	NA	No	No	No	No
CG43797	NM_001273083	0	0	NA	0	NA	No	No	No	No
CG43798	NM_001273114	0	0	NA	0	NA	No	No	No	No
CG34199	NM_001103910	0	0	NA	0	NA	No	No	No	No
CG8738	NM_136559	0	0	NA	0	NA	No	No	No	No
NANS	NM_141938	0	0	NA	0	NA	No	No	No	No
c11.1	NM_001298121	27.2529	14.3867	0.527894	212	41.5012	Yes	Yes	Yes	No
CG32240	NM_168082	0	0	NA	0	NA	No	No	No	No
Or9a	NM_078552	0	0	NA	0	NA	No	No	No	No
EDTP	NM_206151	72.0855	45.8402	0.635914	417	37.8379	Yes	Yes	Yes	No
CG8134	NM_001298354	43.4246	0.739347	0.017026	195	50.86	Yes	No	Yes	No
CG42540	NM_001274492	0	0	NA	1	33.6632	No	No	No	No
PPYR1	NM_132784	0	0	NA	0	NA	No	No	No	No
CG13539	NM_001299830	0	0	NA	0	NA	No	No	No	No
CG13538	NM_137911	0	0	NA	0	NA	No	No	No	No
CG6938	NM_001274804	0	0	NA	0	NA	No	No	No	No
Cyp301a1	NM_136952	0	0	NA	0	NA	No	No	No	No
salm	NM_164966	0	0	NA	0	NA	No	No	No	No
CG13531	NM_001299819	14.9703	9.20198	0.614682	40	58.7658	Yes	Yes	No	No
CG6933	NM_001275168	0	0	NA	0	NA	No	No	No	No
CG13532	NM_137884	0.164265	0	0	7	26.2297	No	No	No	No
CG6937	NM_142809	129.883	206.05	1.58642	422	72.9289	Yes	Yes	Yes	No
lawc	NM_001258650	31.8885	4.24695	0.133181	392	37.3721	No	No	Yes	No
Drep2	NM_001259293	130.51	10.4428	0.0800154	401	77.7909	Yes	Yes	Yes	No
Drep3	NM_136879	0	0	NA	0	NA	No	No	No	No
Drep1	NM_001273980	54.7153	16.7733	0.306555	273	58.1616	Yes	Yes	Yes	No
Neu2	NM_141059	0	0	NA	0	NA	No	No	No	No
Drep4	NM_135787	25.2563	1.68183	0.0665906	133	39.1412	Yes	No	Yes	No
Strip	NM_001274437	37.6582	11.2424	0.298538	293	40.6931	Yes	Yes	Yes	No
Rph	NM_001272499	0.0805585	0	0	0	NA	No	No	No	No
salr	NM_001259054	0	0	NA	0	NA	No	No	No	No
sals	NM_169390	0	0	NA	0	NA	No	No	No	No
salt	NM_143632	0	0	NA	1	113.676	No	No	No	No
CG6034	NM_140748	0.0876871	0.525522	5.99315	0	NA	No	No	No	No
Ir7a	NM_132178	0	0	NA	0	NA	No	No	No	No
Ir7b	NM_132182	1.33451	0	0	4	52.9208	No	No	No	No
Ir7c	NM_001258643	4.33399	0.399603	0.0922023	15	110.437	No	No	No	No
Ir7d	NM_001144703	0	0	NA	0	NA	No	No	No	No
Ir7e	NM_001144704	0	0	NA	0	NA	No	No	No	No
Ir7f	NM_001144705	0	0	NA	0	NA	No	No	No	No
Ir7g	NM_132185	0	0	NA	0	NA	No	No	No	No
elav	NM_001258518	0.695492	1.56307	2.24743	1	79.1746	No	No	No	No
FBXO11	NM_001275512	70.2955	2.29644	0.0326683	458	39.0561	Yes	No	Yes	No
kibra	NM_001300400	22.8634	2.48786	0.108814	188	43.9034	Yes	No	Yes	No
Debcl	NM_176098	83.8763	12.8454	0.153147	499	54.3396	Yes	Yes	Yes	No
CG31921	NM_164380	0	0	NA	0	NA	No	No	No	No
CG31926	NM_001272941	20.9152	111.146	5.31412	99	84.8221	Yes	Yes	No	No
CG31251	NM_169772	19.7311	7.54796	0.382542	61	37.4883	Yes	No	No	No
CG31928	NM_001272940	14.8443	44.1795	2.97619	76	75.7748	Yes	Yes	No	No
CG31259	NM_001300304	0	0	NA	0	NA	No	No	No	No
Ocrl	NM_130606	40.0765	10.2144	0.254873	187	38.9171	Yes	Yes	Yes	No
slou	NM_001275879	0	0	NA	0	NA	No	No	No	No
slow	NM_139641	0.409285	0	0	2	18.1044	No	No	No	No
CG4945	NM_176203	0	0	NA	0	NA	No	No	No	No
CG3264	NM_001299780	0	0	NA	0	NA	No	No	No	No
CG3267	NM_144467	30.4893	29.0112	0.951519	108	54.618	Yes	Yes	Yes	No
CG4949	NM_167554	68.3363	13.4279	0.196497	346	37.3426	Yes	No	Yes	No
Hrb98DE	NM_170370	281.21	40.5431	0.144174	2444	26.4942	Yes	Yes	Yes	No
robl	NM_079047	120.386	179.625	1.49207	678	26.832	Yes	Yes	Yes	No
CG32698	NM_001272461	1.43548	0	0	9	45.9312	No	No	No	No
Csl4	NM_135648	32.1431	84.037	2.61446	213	40.7344	Yes	Yes	Yes	No
Aats-pro	NM_001274408	5.67787	2.26856	0.399543	50	53.902	No	No	No	No
CG32695	NM_001298136	0	0	NA	0	NA	No	No	No	No
CG32694	NM_001298140	0	25.7436	NA	1	22.1923	No	Yes	No	No
betaggt-I	NM_080361	41.1282	23.1082	0.561858	111	67.116	Yes	Yes	Yes	No
Sk1	NM_132489	0.97456	0	0	7	53.0722	No	No	No	No
Sk2	NM_139505	38.5927	18.111	0.469284	154	70.0552	Yes	Yes	Yes	No
Adi1	NM_001104107	56.5298	85.7701	1.51725	379	46.9262	Yes	Yes	Yes	No
CG3088	NM_140077	0	0	NA	0	NA	No	No	No	No
CG3085	NM_001274220	16.492	4.67878	0.283699	66	42.6451	Yes	No	No	No
Pdk1	NM_001274254	109.503	14.5442	0.13282	886	41.0178	Yes	Yes	Yes	No
Pzl	NM_001316564	0	0	NA	0	NA	No	No	No	No
CG15260	NM_135905	0	0	NA	0	NA	No	No	No	No
CG42649	NM_001202035	0	0	NA	0	NA	No	No	No	No
CG15269	NM_135895	0	0	NA	0	NA	No	No	No	No
CG17574	NM_001273997	75.8907	41.3476	0.544832	355	27.5325	Yes	Yes	Yes	No
CG12061	NM_001110997	0	0	NA	0	NA	No	No	No	No
CG12065	NM_132265	15.1902	10.881	0.716313	83	27.6714	Yes	Yes	No	No
jigr1	NM_143152	185.301	6.08096	0.0328167	538	31.6893	Yes	No	Yes	No
CG12069	NM_143562	0.119378	0	0	0	NA	No	No	No	No
cin	NM_057682	58.0967	17.8875	0.307892	386	29.7602	Yes	Yes	Yes	No
CSN8	NM_164809	68.6366	120.038	1.74889	418	43.9466	Yes	Yes	Yes	No
CG3887	NM_001273141	80.2168	38.7272	0.482782	550	24.8523	Yes	Yes	Yes	No
CG3880	NM_138118	0.105711	0	0	0	NA	No	No	No	No
Cka	NM_001259008	47.8318	23.306	0.487248	256	35.5483	Yes	Yes	Yes	No
fz4	NM_078513	42.7894	4.59196	0.107315	270	40.9598	Yes	No	Yes	No
CG13298	NM_139780	136.928	69.3489	0.506463	645	23.4617	Yes	Yes	Yes	No
PMP34	NM_168081	63.4619	4.08087	0.0643042	344	34.1477	Yes	No	Yes	No
CG10376	NM_136055	24.8303	4.72417	0.190259	119	60.332	Yes	No	Yes	No
CG10375	NM_142928	44.6628	11.2381	0.251621	146	50.3945	Yes	No	Yes	No
vari	NM_206011	5.89766	7.31288	1.23996	33	72.496	Yes	Yes	No	No
RanGAP	NM_057364	79.3198	114.124	1.43878	356	45.3027	Yes	Yes	Yes	No
CG2680	NM_130665	0	0	NA	0	NA	No	No	No	No
CG2681	NM_130666	0.133135	0	0	1	69.1613	No	No	No	No
CG2685	NM_130667	30.1493	2.26997	0.0752908	58	28.6209	Yes	No	No	No
Awh	NM_001274450	0	0	NA	0	NA	No	No	No	No
Rbf2	NM_079648	44.1052	38.0786	0.863359	320	37.0904	Yes	Yes	Yes	No
CG7414	NM_001202226	108.25	48.7585	0.450425	664	83.801	Yes	Yes	Yes	No
PTP-ER	NM_166465	26.8004	0	0	170	41.7527	Yes	No	Yes	No
vkg	NM_001273143	0.781179	5.44092	6.96501	169	53.7457	No	Yes	Yes	No
CG9451	NM_001275121	0.309091	2.46991	7.99087	4	58.1687	No	No	No	No
CG9452	NM_140862	0	0	NA	0	NA	No	No	No	No
CG12288	NM_135978	57.7452	11.0326	0.191057	318	26.9106	Yes	Yes	Yes	No
CG12289	NM_140208	0	0	NA	0	NA	No	No	No	No
CG9109	NM_001298721	0	0	NA	0	NA	No	No	No	No
CG9106	NM_167433	0	0	NA	0	NA	No	No	No	No
CG9107	NM_164673	24.0199	13.6174	0.56692	155	34.6323	Yes	Yes	Yes	No
dome	NM_078688	46.6172	16.7284	0.358847	388	27.2406	Yes	Yes	Yes	No
Ndg	NM_206074	0	0	NA	0	NA	No	No	No	No
CG9101	NM_132783	0	0	NA	0	NA	No	No	No	No
pUf68	NM_001169844	67.8503	12.4199	0.183049	329	33.8637	Yes	Yes	Yes	No
Cisd2	NM_143427	122.231	334.109	2.73342	670	61.8502	Yes	Yes	Yes	No
CG15485	NM_135733	0	0	NA	0	NA	No	No	No	No
CG8858	NM_136902	17.9695	61.4467	3.41949	144	80.7936	Yes	Yes	Yes	No
CG15483	NM_135748	0	0	NA	0	NA	No	No	No	No
Kank	NM_001202004	0.858121	0	0	6	68.7894	No	No	No	No
CG15480	NM_135776	0	0	NA	0	NA	No	No	No	No
CG8852	NM_134946	0	0	NA	0	NA	No	No	No	No
CG8851	NM_164544	0	0	NA	0	NA	No	No	No	No
Lerp	NM_170290	16.1371	3.24175	0.200888	105	31.8678	Yes	No	Yes	No
CG1814	NM_136655	11.7535	5.03145	0.428082	78	77.1016	Yes	No	No	No
CG1815	NM_143624	29.6763	0	0	387	25.4549	Yes	No	Yes	No
CG8854	NM_136905	0.215917	0	0	2	33.4374	No	No	No	No
CG11396	NM_140998	39.2982	57.1902	1.45529	184	44.496	Yes	Yes	Yes	No
CG11395	NM_001299592	1.38401	2.76486	1.99772	2	31.4982	No	No	No	No
JYalpha	NM_001110622	0	0	NA	0	NA	No	No	No	No
CG11391	NM_142573	0	0	NA	0	NA	No	No	No	No
CG18301	NM_135575	0	0	NA	0	NA	No	No	No	No
Rbp4	NM_057587	0.0985327	0	0	0	NA	No	No	No	No
CG11399	NM_140997	73.14	22.617	0.309229	652	41.969	Yes	Yes	Yes	No
aurA	NM_057401	62.3813	197.093	3.15949	142	62.1385	Yes	Yes	Yes	No
CG15630	NM_175961	0	0	NA	0	NA	No	No	No	No
aurB	NM_057988	68.5927	82.3727	1.2009	492	40.6387	Yes	Yes	Yes	No
CG12268	NM_001260343	0	0	NA	0	NA	No	No	No	No
twit	NM_136223	0	0	NA	0	NA	No	No	No	No
CG13074	NM_140578	0	0	NA	0	NA	No	No	No	No
unpg	NM_057798	0.0865661	0	0	1	93.3051	No	No	No	No
cmet	NM_080254	24.4892	16.1332	0.658789	97	88.1172	Yes	Yes	No	No
CG6454	NM_142992	23.54	1.56754	0.0665906	150	44.179	Yes	No	Yes	No
antr	NM_001259355	0	0	NA	0	NA	No	No	No	No
CG13884	NM_138191	0.275758	0	0	0	NA	No	No	No	No
CG13887	NM_001299962	157.092	512.594	3.26302	1179	69.2794	Yes	Yes	Yes	No
G9a	NM_001272159	113.469	33.2304	0.292859	591	53.0272	Yes	Yes	Yes	No
CG13077	NM_136146	0	0	NA	0	NA	No	No	No	No
CG43403	NM_001258920	0	0	NA	0	NA	No	No	No	No
Nep3	NM_001258847	0	0	NA	0	NA	No	No	No	No
Nep2	NM_001275331	11.1447	120.551	10.8169	101	39.3815	Yes	Yes	Yes	No
Nep1	NM_001297997	0.390032	0	0	0	NA	No	No	No	No
Nep5	NM_001300625	0.0591962	0	0	0	NA	No	No	No	No
Nep4	NM_142647	0	0	NA	1	66.4114	No	No	No	No
Apf	NM_164880	16.723	25.0559	1.49829	24	62.8905	No	No	No	No
CG17977	NM_144144	10.645	0	0	74	26.4379	No	No	No	No
CG12111	NM_001272412	0	0	NA	0	NA	No	No	No	No
CG11023	NM_001169365	0	0	NA	0	NA	No	No	No	No
MsR2	NM_001274394	0	0	NA	0	NA	No	No	No	No
zpg	NM_001274549	171.032	2.7722	0.0162087	1637	27.4746	Yes	No	Yes	No
Cad89D	NM_142297	0	0	NA	0	NA	No	No	No	No
Iswi	NM_078995	76.2886	17.8165	0.23354	526	43.2856	Yes	Yes	Yes	No
ttm3	NM_136286	0	0	NA	0	NA	No	No	No	No
ttm2	NM_138179	0	0	NA	0	NA	No	No	No	No
CG15876	NM_139668	0	0	NA	0	NA	No	No	No	No
CG15877	NM_139461	36.6899	2.79519	0.0761841	135	34.0806	Yes	No	Yes	No
CG15873	NM_138066	0	0	NA	0	NA	No	No	No	No
CG15870	NM_136997	0.75705	0	0	15	57.3346	No	No	No	No
CG13081	NM_001299158	0	0	NA	0	NA	No	No	No	No
gish	NM_001275696	158.621	15.0724	0.0950216	716	35.5743	Yes	Yes	Yes	No
CG8507	NM_141693	185.064	217.132	1.17328	733	34.1667	Yes	Yes	Yes	No
CG13082	NM_136140	0.11244	0	0	1	18.7271	No	No	No	No
CG8501	NM_136927	0	0	NA	0	NA	No	No	No	No
CG13084	NM_136127	277.138	1051.55	3.79433	830	78.8461	Yes	Yes	Yes	No
CG15878	NM_139442	0	0	NA	2	88.6729	No	No	No	No
CG13086	NM_001273639	0	0	NA	0	NA	No	No	No	No
CG30338	NM_165685	8.65279	28.611	3.30657	50	67.4374	No	Yes	No	No
CG30339	NM_165687	0	0	NA	1	39.28	No	No	No	No
Patj	NM_057994	28.4525	10.8176	0.3802	224	46.2726	Yes	Yes	Yes	No
PIG-V	NM_001299580	43.5036	36.5238	0.839558	239	48.0313	Yes	Yes	Yes	No
PIG-U	NM_135394	55.5463	106.219	1.91225	382	74.0719	Yes	Yes	Yes	No
CG30334	NM_165903	32.3368	27.6856	0.856164	121	84.4297	Yes	No	Yes	No
mRpL43	NM_079104	43.5468	93.8985	2.15627	257	33.4127	Yes	Yes	Yes	No
mRpL42	NM_078949	71.2558	47.1999	0.662401	289	51.1702	Yes	Yes	Yes	No
mRpL41	NM_137178	35.9439	46.9707	1.30678	178	49.8395	Yes	Yes	Yes	No
mRpL40	NM_079594	53.3951	71.5623	1.34024	413	45.0247	Yes	Yes	Yes	No
mRpL47	NM_176433	51.3954	117.296	2.28222	158	51.7136	Yes	Yes	Yes	No
mRpL46	NM_139404	59.5174	57.2725	0.96228	311	61.3435	Yes	Yes	Yes	No
mRpL45	NM_142815	44.4716	99.4179	2.23554	235	63.512	Yes	Yes	Yes	No
mRpL44	NM_141284	58.0151	36.6832	0.632305	342	48.5919	Yes	Yes	Yes	No
mRpL49	NM_001298241	93.7768	71.5567	0.763054	448	42.0263	Yes	Yes	Yes	No
mRpL48	NM_134769	52.8332	61.8547	1.17075	193	43.7155	Yes	Yes	Yes	No
LpR2	NM_001104456	55.7303	23.5482	0.422539	306	55.4042	Yes	Yes	Yes	No
PIG-C	NM_139547	18.7862	63.9504	3.40411	34	101.942	Yes	Yes	No	No
LpR1	NM_001276044	17.0918	9.12777	0.534043	157	43.8933	Yes	Yes	Yes	No
Ca-beta	NM_001259049	0	0	NA	1	92.812	No	No	No	No
CG1104	NM_141433	8.42963	14.9336	1.77156	58	48.3362	Yes	Yes	No	No
CG1105	NM_141431	20.1975	13.1833	0.652719	214	37.4712	Yes	Yes	Yes	No
CG1103	NM_141199	70.8942	128.373	1.81076	172	44.7222	Yes	Yes	Yes	No
alphaTub85E	NM_079573	1.12509	0	0	0	NA	No	No	No	No
MICAL-like	NM_140364	55.8554	10.2849	0.184135	241	53.6491	Yes	Yes	Yes	No
CG1109	NM_169091	54.4221	41.2315	0.757625	104	66.3502	Yes	Yes	Yes	No
CG4161	NM_001299026	0	0	NA	0	NA	No	No	No	No
CG4164	NM_134681	58.841	60.4531	1.0274	0	NA	Yes	Yes	No	No
CG4168	NM_001299024	0	0	NA	0	NA	No	No	No	No
C15	NM_057525	0	0	NA	0	NA	No	No	No	No
CG14230	NM_134505	49.6035	17.2587	0.347933	29	63.3094	Yes	Yes	No	No
CG14234	NM_134507	0.333627	0	0	0	NA	No	No	No	No
CG44314	NM_001299401	0	0	NA	0	NA	No	No	No	No
CG43329	NM_001259957	0	0	NA	0	NA	No	No	No	No
CG34039	NM_001038923	29.4128	18.6959	0.635637	120	43.3609	Yes	Yes	Yes	No
CG43638	NM_001274812	0	0	NA	0	NA	No	No	No	No
Map60	NM_057604	128.396	39.0199	0.303903	855	38.7849	Yes	Yes	Yes	No
Taf6	NM_079437	33.7231	27.2227	0.807241	133	49.3954	Yes	Yes	Yes	No
CG43321	NM_001258996	0	0	NA	0	NA	No	No	No	No
CG43320	NM_143324	9.03245	0	0	60	37.2571	Yes	No	No	No
CG34031	NM_001259965	0.799246	0	0	5	27.7532	No	No	No	No
CG43630	NM_001260150	0	0	NA	2	28.0773	No	No	No	No
Ada2b	NM_001275438	107.445	35.7067	0.332327	671	60.9766	Yes	Yes	Yes	No
CG34034	NM_001170207	0	0	NA	0	NA	No	No	No	No
mRpL4	NM_080200	57.6816	112.915	1.95756	185	69.0151	Yes	Yes	Yes	No
mRpL2	NM_079298	33.7191	69.1108	2.04961	116	58.561	Yes	Yes	Yes	No
mRpL3	NM_078611	65.4589	77.3362	1.18145	169	46.3185	Yes	Yes	Yes	No
mRpL1	NM_079551	72.1703	59.0138	0.817701	247	57.964	Yes	Yes	Yes	No
lox2	NM_079082	0	0	NA	0	NA	No	No	No	No
defl	NM_140095	13.6894	15.5683	1.13725	59	50.4887	Yes	Yes	No	No
CG17258	NM_134898	0.0472239	0	0	0	NA	No	No	No	No
CG44174	NM_001275799	0	0	NA	0	NA	No	No	No	No
CG32150	NM_168635	0	0	NA	0	NA	No	No	No	No
RPA3	NM_001298202	167.855	358.919	2.13826	378	99.0785	Yes	Yes	Yes	No
RPA2	NM_136233	146.932	479.936	3.26637	300	81.1454	Yes	Yes	Yes	No
CG6204	NM_142972	6.04388	5.76258	0.953456	53	24.8549	Yes	Yes	No	No
Slimp	NM_170125	12.5963	8.14656	0.646743	57	44.6098	Yes	Yes	No	No
COQ7	NM_143710	73.3308	150.885	2.05759	254	78.6054	Yes	Yes	Yes	No
SrpRbeta	NM_001274667	64.5902	125.834	1.94819	186	46.5017	Yes	Yes	Yes	No
tara	NM_080255	2.66243	0.540892	0.203158	14	19.9687	No	No	No	No
Cdc42	NM_001258833	138.801	98.6003	0.710373	892	54.4967	Yes	Yes	Yes	No
CG46192	NM_001316662	0	0	NA	0	NA	No	No	No	No
CG14509	NM_001276131	0.165717	0	0	1	24.4056	No	No	No	No
CG14057	NM_140698	43.3509	69.6587	1.60686	165	34.4214	Yes	Yes	Yes	No
CstF-50	NM_143626	23.581	12.5224	0.531039	149	41.1838	Yes	Yes	Yes	No
CG14507	NM_001104494	0	0	NA	0	NA	No	No	No	No
CG14506	NM_001276138	0	0	NA	0	NA	No	No	No	No
CG14053	NM_001272251	0.758227	0	0	7	36.4492	No	No	No	No
CG14052	NM_001272252	0	0	NA	0	NA	No	No	No	No
Dhc98D	NM_079817	0.200561	0.240399	1.19863	1	129.117	No	No	No	No
CG14050	NM_001258558	0.834829	0	0	2	59.7551	No	No	No	No
CHMP2B	NM_139690	26.9016	43.4068	1.61354	102	69.2203	Yes	Yes	Yes	No
Mon1	NM_135024	33.5441	0.950521	0.0283364	287	25.5349	Yes	No	Yes	No
CG10616	NM_001300119	48.2764	31.6931	0.656493	297	37.4332	Yes	Yes	Yes	No
Trip1	NM_078754	249.138	184.384	0.74009	2044	56.2863	Yes	Yes	Yes	No
CG18428	NM_001260349	13.7222	24.1879	1.76269	145	50.8582	No	No	Yes	No
CG8668	NM_001298811	78.426	62.4411	0.796178	408	48.0833	Yes	Yes	Yes	No
CG18420	NM_205993	0	0	NA	0	NA	No	No	No	No
Mlh1	NM_057674	24.4397	16.5249	0.67615	95	65.6058	Yes	Yes	No	No
mxc	NM_132320	50.0344	0.401066	0.00801581	244	40.3083	Yes	No	Yes	No
Hexo2	NM_080342	13.6693	22.0869	1.6158	43	106.28	Yes	Yes	No	No
Hexo1	NM_168076	15.4851	15.2612	0.98554	41	73.8762	Yes	Yes	No	No
CG5958	NM_135275	36.2006	122.475	3.38323	257	74.9706	Yes	Yes	Yes	No
CG5955	NM_140973	0	0	NA	1	189.136	No	No	No	No
CG5484	NM_143241	48.0599	146.221	3.04247	257	60.7419	Yes	Yes	Yes	No
CG5482	NM_001299651	71.8099	78.5388	1.09371	644	38.1283	Yes	Yes	Yes	No
CG5953	NM_001273574	18.0219	0	0	80	40.5414	Yes	No	No	No
CG32206	NM_168794	0	0	NA	1	21.904	No	No	No	No
CG32204	NM_001104171	0	0	NA	0	NA	No	No	No	No
Cpr67B	NM_140049	0.166282	0	0	0	NA	No	No	No	No
Su(dx)	NM_164448	62.5531	16.1748	0.258577	682	33.8457	Yes	Yes	Yes	No
por	NM_057542	20.4205	0.47806	0.0234107	151	55.4285	Yes	No	Yes	No
Cpr78Cb	NM_001275215	0.653539	0	0	7	64.0782	No	No	No	No
Cpr78Cc	NM_141043	0	0	NA	0	NA	No	No	No	No
Cdep	NM_001104215	0.248122	0	0	2	20.5407	No	No	No	No
Cpr78Ca	NM_141041	0	0	NA	0	NA	No	No	No	No
Mdh2	NM_142439	214.091	458.352	2.14092	943	117.045	Yes	Yes	Yes	No
Mdh1	NM_001298874	382.977	803.22	2.09731	2270	88.1189	Yes	Yes	Yes	No
CdGAPr	NM_001273671	25.502	3.19799	0.125402	310	25.3974	Yes	Yes	Yes	No
CG11626	NM_001104365	0.111821	0	0	0	NA	No	No	No	No
Shark	NM_080004	39.3816	2.9008	0.0736588	222	28.2787	Yes	No	Yes	No
Pka-C2	NM_170518	0.600419	0	0	1	134.738	No	No	No	No
Pka-C3	NM_079373	2.93598	0	0	6	37.9537	No	No	No	No
Usp32	NM_001275145	25.1277	13.4689	0.536019	237	50.2948	Yes	Yes	Yes	No
Pka-C1	NM_205950	53.8366	50.5269	0.938525	325	56.1684	Yes	Yes	Yes	No
CG11629	NM_136281	0	0	NA	0	NA	No	No	No	No
Myc	NM_001272275	119.742	0	0	551	33.7056	Yes	No	Yes	No
Myb	NM_206731	70.5083	22.4002	0.317696	211	75.0889	Yes	Yes	Yes	No
CG12448	NM_165140	0	0	NA	0	NA	No	No	No	No
CG3386	NM_001274288	12.2333	2.68228	0.219262	10	87.0722	No	No	No	No
CG32061	NM_168409	0	0	NA	0	NA	No	No	No	No
CG32066	NM_168416	62.9849	63.1762	1.00304	141	54.0525	Yes	Yes	Yes	No
FLASH	NM_206106	22.2189	0	0	169	25.1146	Yes	No	Yes	No
CG7080	NM_142762	0.255257	0	0	4	26.0807	No	No	No	No
CG7084	NM_001300531	0	0	NA	0	NA	No	No	No	No
CG15674	NM_137749	0.0946312	0.567139	5.99315	0	NA	No	No	No	No
Hsp60B	NM_080186	0	0	NA	0	NA	No	No	No	No
CG18284	NM_001298878	0	0	NA	0	NA	No	No	No	No
CG15673	NM_137747	9.70765	34.9077	3.59589	51	69.1305	No	Yes	No	No
l(3)07882	NM_001316506	34.7341	1.16457	0.0335281	96	34.1127	Yes	No	No	No
poe	NM_057638	11.3011	18.9513	1.67695	49	81.9995	Yes	Yes	No	No
DIP1	NM_001169343	26.1262	13.4402	0.514434	137	29.3217	Yes	Yes	Yes	No
DIP2	NM_138175	32.2977	2.49403	0.0772203	221	27.5714	Yes	Yes	Yes	No
CG11560	NM_001316463	18.1293	0.835784	0.0461012	93	21.5375	Yes	No	No	No
CG11562	NM_134672	66.5165	4.45412	0.0669626	230	48.8232	Yes	No	Yes	No
CG11563	NM_143627	62.8536	16.5439	0.263213	311	34.4665	Yes	No	Yes	No
HDAC6	NM_001272640	46.3093	14.8607	0.3209	106	68.2888	Yes	Yes	Yes	No
Gp93	NM_143344	137.265	429.951	3.13226	386	80.0146	Yes	Yes	Yes	No
CG13708	NM_139676	0	0	NA	0	NA	No	No	No	No
CG13707	NM_001259704	0	0	NA	0	NA	No	No	No	No
CG13704	NM_139682	0	0	NA	1	90.3857	No	No	No	No
CG13705	NM_139681	0	0	NA	0	NA	No	No	No	No
E(var)3-9	NM_141595	111.947	2.12718	0.0190017	522	39.2941	Yes	No	Yes	No
CG13700	NM_001275084	0	0	NA	0	NA	No	No	No	No
modSP	NM_080515	0.33175	0	0	1	28.6707	No	No	No	No
CG15019	NM_001104032	84.4778	5.60467	0.0663448	429	20.8818	Yes	No	Yes	No
alphaTub67C	NM_079285	387.501	992.879	2.56226	860	77.4785	Yes	Yes	Yes	No
CG15011	NM_139622	18.5316	3.54456	0.191271	202	30.9959	Yes	No	Yes	No
CG15012	NM_001169876	53.0453	158.954	2.99658	311	57.3	Yes	Yes	Yes	No
CG15014	NM_139635	58.1095	0.789703	0.0135899	423	25.5335	Yes	No	Yes	No
Zyx	NM_166819	41.4609	11.975	0.288827	329	42.6555	Yes	Yes	Yes	No
CG9667	NM_141511	22.3482	37.0462	1.65768	63	43.6358	Yes	Yes	No	No
CG9664	NM_164533	0.0684747	0	0	0	NA	No	No	No	No
CG6136	NM_142203	9.36313	6.89127	0.736001	54	36.5499	No	No	No	No
CG9662	NM_001273068	71.9122	140.616	1.95539	439	91.4834	Yes	Yes	Yes	No
CG9669	NM_140668	113.412	250.002	2.20438	1110	60.2499	Yes	Yes	Yes	No
CG3746	NM_001299806	0	0	NA	1	30.6001	No	No	No	No
CG3744	NM_001276006	46.1884	17.7071	0.383368	261	47.8138	Yes	Yes	Yes	No
Cyp318a1	NM_167318	0	0	NA	0	NA	No	No	No	No
CG3748	NM_205941	0	0	NA	0	NA	No	No	No	No
CG7627	NM_001259014	87.5461	130.896	1.49517	213	76.7617	Yes	Yes	Yes	No
nkd	NM_080049	0.0890647	0	0	0	NA	No	No	No	No
Sec10	NM_142961	17.2032	44.1862	2.56849	90	62.5816	Yes	Yes	No	No
Sec13	NM_001300551	101.829	214.635	2.10779	340	66.872	Yes	Yes	Yes	No
Sec15	NM_142685	35.4122	17.8481	0.504011	295	35.3438	Yes	Yes	Yes	No
Sec16	NM_001298230	27.6472	68.5743	2.48033	242	55.6056	Yes	Yes	Yes	No
Leash	NM_141780	15.145	0	0	86	48.1918	Yes	No	No	No
CG5989	NM_139985	31.027	2.31713	0.074681	318	46.9145	Yes	No	Yes	No
CG33337	NM_206546	0	0	NA	0	NA	No	No	No	No
Np	NM_136593	0	0	NA	0	NA	No	No	No	No
Tsp33B	NM_078828	0	0	NA	0	NA	No	No	No	No
Ir21a	NM_001103573	0.049167	0	0	0	NA	No	No	No	No
Arc42	NM_142583	75.1346	116.326	1.54823	407	71.4316	Yes	Yes	Yes	No
CG9590	NM_142231	24.8708	50.4154	2.02709	166	48.1889	Yes	Yes	Yes	No
CG9593	NM_142236	0	0	NA	0	NA	No	No	No	No
CG9592	NM_140449	0	0	NA	0	NA	No	No	No	No
hep	NM_001272572	31.1323	2.5559	0.0820979	106	43.5039	Yes	No	Yes	No
CG6689	NM_141794	19.1806	7.33736	0.382542	117	53.309	Yes	Yes	Yes	No
her	NM_001273577	17.9293	0	0	61	35.5909	Yes	No	No	No
CG9596	NM_001298750	26.8432	3.97924	0.14824	135	41.5138	Yes	No	Yes	No
POLDIP2	NM_169054	29.6398	1.17251	0.0395587	190	28.8354	Yes	No	Yes	No
CG6686	NM_164978	21.7652	0	0	146	46.7663	No	No	Yes	No
CG6683	NM_139975	31.5915	30.8841	0.977606	197	36.9	Yes	Yes	Yes	No
CG11158	NM_132684	3.71223	3.708	0.998858	22	71.2343	No	No	No	No
kdn	NM_167072	53.6005	5.28981	0.0986896	480	20.3757	Yes	No	Yes	No
hec	NM_132615	0	0	NA	1	141.86	No	No	No	No
l(2)gl	NM_001258875	109.54	4.0393	0.036875	829	44.8336	Yes	Yes	Yes	No
e(y)2b	NM_001300275	1.02424	0	0	2	47.0997	No	No	No	No
CG17732	NM_001202206	0	0	NA	0	NA	No	No	No	No
HHEX	NM_142681	0	0	NA	0	NA	No	No	No	No
CG17737	NM_139535	573.247	1318.99	2.3009	3040	57.7222	Yes	Yes	Yes	No
CG17883	NM_001042984	84.0534	26.5129	0.315429	19	33.6172	Yes	Yes	No	No
CG17734	NM_001260114	15.7416	2.69548	0.171233	2046	37.7186	No	No	Yes	No
mRpS7	NM_001273410	113.451	49.3402	0.434901	558	43.8326	Yes	Yes	Yes	No
mRpS6	NM_001259694	51.6619	116.802	2.26089	247	47.8969	Yes	Yes	Yes	No
Rpp30	NM_001272879	16.0299	8.65492	0.539923	111	40.6891	Yes	No	Yes	No
CG17738	NM_141915	0	0	NA	0	NA	No	No	No	No
mRpS2	NM_078749	43.5187	84.3233	1.93764	359	74.0152	Yes	Yes	Yes	No
CG12547	NM_001273775	63.5494	1.04155	0.0163897	287	33.9298	Yes	No	Yes	No
CG12546	NM_141148	0	0	NA	0	NA	No	No	No	No
CG2162	NM_001169861	88.0036	22.6037	0.256849	504	28.5532	Yes	Yes	Yes	No
CG33137	NM_176163	0	0	NA	0	NA	No	No	No	No
CG12541	NM_132150	0	0	NA	0	NA	No	No	No	No
Map205	NM_001276225	36.3054	352.543	9.7105	173	66.1669	Yes	Yes	Yes	No
CG33301	NM_001298864	0	0	NA	0	NA	No	No	No	No
RpS26	NM_001299113	2574.87	302.095	0.117324	12794	48.2657	Yes	Yes	Yes	No
RpS27	NM_143102	2817.62	1211.52	0.429979	16731	57.4989	Yes	Yes	Yes	No
rush	NM_001297855	45.5885	25.9436	0.569083	626	50.7085	Yes	Yes	Yes	No
RpS25	NM_079591	3679.8	1446.53	0.393101	13203	55.547	Yes	Yes	Yes	No
RpS23	NM_137095	2997.35	657.81	0.219464	4764	52.1536	Yes	Yes	Yes	No
l(1)G0020	NM_001298096	25.0261	0.511896	0.0204544	178	26.8479	Yes	No	Yes	No
RpS21	NM_001273041	1082.48	195.276	0.180396	4937	64.4209	Yes	Yes	Yes	No
RpS29	NM_169311	2767.09	434.663	0.157083	11974	64.0172	Yes	Yes	Yes	No
mdy	NM_165195	17.5284	0	0	149	16.3215	Yes	No	Yes	No
CG1486	NM_167743	28.4188	10.4811	0.368809	284	29.0967	Yes	Yes	Yes	No
CG16935	NM_137070	62.7279	90.596	1.44427	384	54.0251	Yes	Yes	Yes	No
Dcr-1	NM_079729	18.6466	8.06793	0.432676	146	60.612	Yes	Yes	Yes	No
TyrRII	NM_001300451	0	0	NA	0	NA	No	No	No	No
Ser6	NM_078702	0	0	NA	0	NA	No	No	No	No
Ser7	NM_132354	0	0	NA	0	NA	No	No	No	No
ac	NM_057476	0	0	NA	0	NA	No	No	No	No
ab	NM_057214	0	0	NA	0	NA	No	No	No	No
Mpcp	NM_001259828	246.635	365.595	1.48233	2902	68.9347	Yes	Yes	Yes	No
uif	NM_001258995	0.0113699	0	0	0	NA	No	No	No	No
al	NM_164382	0	0	NA	0	NA	No	No	No	No
Ser8	NM_137030	0	0	NA	1	24.1178	No	No	No	No
CG7759	NM_165831	0.12611	3.40107	26.9692	2	109.376	No	No	No	No
ap	NM_165445	0.179243	0	0	0	NA	No	No	No	No
Hop	NM_058006	208.995	809.529	3.87344	1252	62.2978	Yes	Yes	Yes	No
Cpr11B	NM_132579	0	0	NA	0	NA	No	No	No	No
CG9849	NM_137896	25.4584	4.05069	0.15911	195	21.3646	Yes	No	Yes	No
Swim	NM_137808	9.19518	26.9678	2.93282	160	47.6339	Yes	Yes	Yes	No
Not3	NM_001273783	83.3821	49.6782	0.59579	527	53.5558	Yes	Yes	Yes	No
CG5177	NM_001273262	0.156063	0	0	1	36.9039	No	No	No	No
Blimp-1	NM_001300016	0.0342181	0	0	0	NA	No	No	No	No
Strn-Mlck	NM_001274090	0.138069	0.206866	1.49829	8	87.9687	No	No	No	No
CG5174	NM_001259478	101.418	152.986	1.50848	934	58.3242	Yes	Yes	Yes	No
CG5172	NM_132976	0	0	NA	0	NA	No	No	No	No
CG5171	NM_001298780	0.473646	3.78485	7.99087	2	91.3883	No	No	No	No
Rrp46	NM_141744	21.1242	23.5276	1.11377	139	44.4431	Yes	Yes	Yes	No
CG45781	NM_001015335	2.5186	0.457405	0.181611	6	49.3684	No	No	No	No
Trs20	NM_140584	25.0358	23.6911	0.946287	261	29.5874	No	No	Yes	No
sowah	NM_001144471	15.3087	17.8398	1.16533	113	37.1229	Yes	Yes	Yes	No
CG1667	NM_136681	59.2048	1.48773	0.0251285	405	26.1071	Yes	No	Yes	No
CG1665	NM_136679	31.3168	76.576	2.44521	227	69.7411	Yes	Yes	Yes	No
CG1663	NM_136677	31.2918	3.93434	0.12573	202	28.995	Yes	No	Yes	No
CG1662	NM_001298280	46.5927	0	0	264	31.7307	Yes	No	Yes	No
Hen1	NM_136888	16.4534	0.648735	0.0394286	106	28.2774	Yes	No	Yes	No
Not10	NM_001316562	20.5984	6.68357	0.32447	120	38.0915	Yes	Yes	Yes	No
CG17207	NM_206480	0	0	NA	0	NA	No	No	No	No
Arf79F	NM_057607	344.649	1097.91	3.18559	1623	47.7944	Yes	Yes	Yes	No
Mpc1	NM_001275791	82.2946	135.964	1.65217	596	54.4188	Yes	Yes	Yes	No
CG34417	NM_001103426	2.34111	9.51727	4.06528	1	93.4502	Yes	Yes	No	No
upd2	NM_133049	0	0	NA	0	NA	No	No	No	No
TpnC73F	NM_001300162	0	0	NA	1	21.8786	No	No	No	No
a5	NM_057650	0	0	NA	0	NA	No	No	No	No
Esyt2	NM_170652	0.913757	8.51866	9.32268	28	60.7403	No	Yes	No	No
a6	NM_001272212	23.4474	0	0	270	34.5179	Yes	No	Yes	No
CG7943	NM_170462	52.0163	13.0854	0.251564	239	61.9415	Yes	Yes	Yes	No
SNRPG	NM_132911	439.729	702.225	1.59695	1398	62.3096	Yes	Yes	Yes	No
CG42666	NM_001201600	13.3005	0.980065	0.0736863	88	41.1539	Yes	No	No	No
CG43400	NM_001259016	0	0	NA	0	NA	No	No	No	No
CG43401	NM_001298633	0	0	NA	0	NA	No	No	No	No
CG43402	NM_001298634	0	0	NA	0	NA	No	No	No	No
Txl	NM_079214	163.212	103.2	0.632305	928	27.1534	Yes	Yes	Yes	No
CG34204	NM_001103931	0	0	NA	0	NA	No	No	No	No
CG34205	NM_001103937	0	0	NA	2	92.2236	No	No	No	No
CG34206	NM_001103938	0	0	NA	11	52.7384	No	No	No	No
mRpS29	NM_079087	62.3999	75.7003	1.21315	184	60.7678	Yes	Yes	Yes	No
CG34208	NM_001103943	0	0	NA	2	77.0094	No	No	No	No
cpa	NM_137695	89.723	63.9504	0.712753	962	46.3828	Yes	Yes	Yes	No
cpb	NM_001272948	71.3207	202.962	2.84576	184	88.097	Yes	Yes	Yes	No
mRpS25	NM_078598	71.9497	114.237	1.58774	329	61.7459	Yes	Yes	Yes	No
CG13148	NM_136967	1.03195	0.687183	0.665906	6	71.6519	No	No	No	No
mRpS23	NM_165065	72.6622	84.2856	1.15996	596	41.3227	Yes	Yes	Yes	No
CG8417	NM_141683	11.1096	10.2433	0.922023	50	27.4133	Yes	Yes	No	No
mRpS21	NM_001275606	96.8245	133.124	1.3749	636	50.2236	Yes	Yes	Yes	No
cpx	NM_001275319	0	0	NA	0	NA	No	No	No	No
Cks30A	NM_057599	123.974	346.454	2.79456	417	101.283	Yes	Yes	Yes	No
prominin-like	NM_001259658	35.2934	26.6579	0.75532	236	47.6548	Yes	Yes	Yes	No
Arr1	NM_001259144	0	0	NA	0	NA	No	No	No	No
scf	NM_058044	27.3593	41.1864	1.50539	153	42.8194	Yes	Yes	Yes	No
sca	NM_165951	0	0	NA	0	NA	No	No	No	No
Rbbp5	NM_140952	12.8752	7.71629	0.599315	124	33.4039	Yes	Yes	Yes	No
scb	NM_079026	5.65446	21.4846	3.79958	47	65.6894	Yes	Yes	No	No
Fib	NM_079093	101.344	8.15759	0.0804941	392	25.7607	Yes	No	Yes	No
Fic	NM_135182	41.5381	0	0	287	25.6989	Yes	No	Yes	No
deltaTry	NM_078970	0	0	NA	2	31.335	No	No	No	No
GluClalpha	NM_001275811	0	0	NA	1	160.183	No	No	No	No
CG5569	NM_137996	68.9405	82.3641	1.19471	555	55.7386	Yes	Yes	Yes	No
Fie	NM_133165	0	0	NA	1	17.4961	No	No	No	No
scu	NM_001258800	247.452	547.305	2.21176	657	93.2397	Yes	Yes	Yes	No
CG11815	NM_139428	0	0	NA	0	NA	No	No	No	No
mnb	NM_167581	80.4523	16.6451	0.206894	152	35.5572	Yes	Yes	Yes	No
CG5567	NM_140758	62.4289	26.3374	0.421878	554	28.8986	Yes	Yes	Yes	No
mnd	NM_079350	49.5946	65.9946	1.33068	189	45.9267	Yes	Yes	Yes	No
CG11811	NM_140151	85.6186	3.36108	0.0392564	592	44.4089	Yes	No	Yes	No
Fim	NM_078661	83.9464	79.1706	0.943108	444	43.2779	Yes	Yes	Yes	No
CG8712	NM_165587	39.9872	6.67378	0.166898	206	39.0626	Yes	No	Yes	No
CG8713	NM_136505	4.6055	0	0	20	63.4013	No	No	No	No
tx	NM_001300614	0	0	NA	0	NA	No	No	No	No
Inos	NM_058057	46.3725	90.8661	1.95948	408	49.3059	Yes	Yes	Yes	No
tw	NM_001272173	0	0	NA	0	NA	No	No	No	No
Eaf	NM_136429	59.1537	4.48756	0.0758627	276	31.6751	Yes	No	Yes	No
tn	NM_001144235	0.0270615	0	0	0	NA	No	No	No	No
to	NM_001300596	0	0	NA	0	NA	No	No	No	No
CG43373	NM_001104152	0	0	NA	0	NA	No	No	No	No
tj	NM_001273653	0.451984	4.06321	8.98973	4	73.4892	No	No	No	No
nord	NM_138056	0	0	NA	0	NA	No	No	No	No
dsh	NM_078563	60.5411	12.8294	0.211912	311	35.4297	Yes	Yes	Yes	No
CG8414	NM_137240	48.3723	0	0	320	47.8268	Yes	No	Yes	No
CG31493	NM_169174	0	0	NA	0	NA	No	No	No	No
CG13551	NM_166597	390.121	1018.4	2.61047	648	94.7834	Yes	Yes	Yes	No
CG31496	NM_169182	0	0	NA	0	NA	No	No	No	No
CG6912	NM_142162	0.389409	0	0	2	61.4915	No	No	No	No
CG31495	NM_169559	15.6103	17.2141	1.10274	76	27.7816	Yes	Yes	No	No
fu12	NM_001169441	40.4162	14.3043	0.353926	301	49.1501	Yes	Yes	Yes	No
CG13558	NM_137956	0	0	NA	0	NA	No	No	No	No
dsd	NM_001276084	29.2748	2.98001	0.101794	243	40.2944	Yes	Yes	Yes	No
Irc	NM_001275724	3.63747	11.0786	3.0457	26	55.5946	No	Yes	No	No
ro	NM_170294	0.12152	0	0	2	33.8253	No	No	No	No
RpI1	NM_079019	20.5099	0.149718	0.00729982	164	24.3933	Yes	No	Yes	No
Neos	NM_079231	47.4505	21.2427	0.447681	190	29.534	Yes	Yes	Yes	No
CG33926	NM_001300075	1.07293	0	0	9	55.5716	No	No	No	No
CG33927	NM_001031976	0	0	NA	0	NA	No	No	No	No
CG33920	NM_001032043	0	0	NA	0	NA	No	No	No	No
CG33922	NM_001032046	0	0	NA	0	NA	No	No	No	No
CG42758	NM_001202177	0	0	NA	0	NA	No	No	No	No
pbl	NM_079241	52.0348	1.31583	0.0252876	568	33.9422	Yes	No	Yes	No
CG33928	NM_001032105	0	0	NA	0	NA	No	No	No	No
CG42752	NM_001201910	0	0	NA	0	NA	No	No	No	No
CG42751	NM_001201863	0	0	NA	1	119.411	No	No	No	No
RagC-D	NM_136517	43.6718	49.4455	1.13221	110	73.0759	Yes	Yes	Yes	No
Apoltp	NM_205948	0	0.507588	NA	0	NA	No	No	No	No
Smr	NM_001272562	62.3792	14.9838	0.240204	165	55.8932	Yes	Yes	Yes	No
lin-52	NM_001297979	88.8266	91.3094	1.02795	561	51.62	Yes	Yes	Yes	No
Dsk	NM_080106	0	0	NA	0	NA	No	No	No	No
CG31278	NM_001300344	8.79582	0	0	68	32.9579	No	No	No	No
CG31279	NM_001275702	2.27115	0.567139	0.249715	33	87.5659	No	No	No	No
CG31275	NM_169732	0	0	NA	0	NA	No	No	No	No
CG31272	NM_141756	0	0	NA	0	NA	No	No	No	No
Sodh-2	NM_079587	29.9698	50.914	1.69885	159	57.055	Yes	Yes	Yes	No
Sodh-1	NM_058000	0	0	NA	1	57.4064	No	No	No	No
TfIIA-S	NM_079743	92.2008	72.778	0.789342	613	33.7921	Yes	Yes	Yes	No
CG4968	NM_135531	145.14	273.805	1.88648	378	57.7869	Yes	Yes	Yes	No
CG4218	NM_001299007	0	0	NA	0	NA	No	No	No	No
CG42693	NM_001202399	0	0	NA	2	22.4096	No	No	No	No
CG4962	NM_140608	0	0	NA	1	40.0714	No	No	No	No
CG4960	NM_001300604	0	0	NA	0	NA	No	No	No	No
CG4210	NM_142173	18.7318	26.1433	1.39567	37	74.9676	No	Yes	No	No
CG4213	NM_134676	0	0	NA	0	NA	No	No	No	No
slmb	NM_001275873	101.687	148.692	1.46225	416	71.366	Yes	Yes	Yes	No
SmF	NM_078984	174.121	427.513	2.45526	932	42.9128	Yes	Yes	Yes	No
CG43736	NM_001298043	42.0614	20.5412	0.488363	366	38.481	Yes	Yes	Yes	No
SmB	NM_001201851	130.528	67.735	0.518932	484	27.4147	Yes	Yes	Yes	No
CCDC53	NM_135334	28.6341	10.6306	0.371257	82	32.5822	Yes	No	No	No
Hira	NM_132173	34.1152	22.9011	0.671288	87	49.0007	Yes	Yes	No	No
CG14265	NM_130694	0	0	NA	0	NA	No	No	No	No
CG14260	NM_143294	0	0	NA	1	147.719	No	No	No	No
CG14262	NM_143293	0.137103	0	0	0	NA	No	No	No	No
Wwox	NM_135327	11.2589	22.9047	2.03437	80	44.8283	Yes	Yes	No	No
Men-b	NM_143702	51.0106	10.5279	0.206387	92	47.3315	Yes	Yes	No	No
Cont	NM_141204	42.3035	16.6541	0.39368	310	36.2233	Yes	Yes	Yes	No
CG14907	NM_142317	13.9563	0	0	79	38.4908	No	No	No	No
Adat1	NM_135832	3.43641	0	0	20	44.999	No	No	No	No
Adk3	NM_001300350	28.3925	47.4019	1.66952	95	42.0712	Yes	Yes	No	No
Adk1	NM_168493	6.09425	0	0	41	50.2191	No	No	No	No
pico	NM_167686	86.8954	42.083	0.484295	884	56.3719	Yes	Yes	Yes	No
CG15249	NM_001103459	0.23713	0	0	0	NA	No	No	No	No
Pde8	NM_001169803	0.814074	0.813145	0.998858	5	53.2342	No	No	No	No
CG7755	NM_137266	0	0	NA	0	NA	No	No	No	No
Pde6	NM_142112	0.0368567	0	0	0	NA	No	No	No	No
CG15247	NM_132356	1.55649	0	0	20	26.1154	No	No	No	No
alpha-Est10	NM_079533	28.8132	6.62462	0.229916	153	35.8804	Yes	Yes	Yes	No
vib	NM_001275797	84.6248	188.296	2.22507	242	64.6295	Yes	Yes	Yes	No
vig	NM_165102	18.5868	4.62001	0.248564	117	32.3574	Yes	No	Yes	No
vih	NM_140325	162.18	740.975	4.56885	812	84.1612	Yes	Yes	Yes	No
CG12730	NM_001297967	1.84209	0	0	39	79.4545	No	No	No	No
vir	NM_080161	8.50874	1.58943	0.186799	67	35.159	Yes	No	No	No
vis	NM_176157	0.479548	0	0	0	NA	No	No	No	No
Df31	NM_001032217	1215.69	3949.22	3.24853	3900	73.1976	Yes	Yes	Yes	No
Gr10b	NM_078566	0	0	NA	0	NA	No	No	No	No
corto	NM_001259993	83.7151	10.9366	0.130641	464	41.0942	Yes	Yes	Yes	No
CG10399	NM_001298767	16.7889	49.9132	2.97298	91	58.2659	Yes	Yes	No	No
Kap3	NM_001103480	44.3735	2.62007	0.0590458	365	38.3994	Yes	No	Yes	No
CG10395	NM_136323	82.8389	2.75305	0.0332337	538	28.4728	Yes	No	Yes	No
l(2)41Ab	NM_001110887	1.5799	0	0	4	68.8248	No	No	No	No
CG2118	NM_001260462	46.0269	70.2998	1.52736	364	97.4919	Yes	Yes	Yes	No
rhea	NM_001274657	18.3094	38.4188	2.09831	106	61.7518	Yes	Yes	Yes	No
BRWD3	NM_170139	39.2474	12.744	0.324711	388	58.264	Yes	Yes	Yes	No
CG7432	NM_142568	0	0	NA	0	NA	No	No	No	No
CG2113	NM_139500	0	0	NA	0	NA	No	No	No	No
CG2116	NM_132216	33.2097	0	0	235	30.4133	Yes	No	Yes	No
CG12766	NM_139582	0	0	NA	0	NA	No	No	No	No
cact	NM_057595	219.55	62.1348	0.28301	1445	44.3093	Yes	Yes	Yes	No
CG3402	NM_138201	61.6995	86.2051	1.39718	332	41.18	Yes	Yes	Yes	No
CG5361	NM_141721	0	0	NA	0	NA	No	No	No	No
CG5367	NM_135543	1.1344	3.77702	3.32953	0	NA	No	No	No	No
CG9121	NM_001273152	0.163385	0	0	0	NA	No	No	No	No
CG9123	NM_132790	4.9531	0	0	45	29.7049	No	No	No	No
CG9436	NM_136391	62.3182	140.983	2.26232	211	68.4866	Yes	Yes	Yes	No
CG9125	NM_206769	30.1886	30.4929	1.01008	255	101.886	Yes	Yes	Yes	No
Acph-1	NM_080178	60.221	155.666	2.58491	387	100.705	Yes	Yes	Yes	No
CG10669	NM_001170257	8.68076	5.83955	0.672701	39	20.7956	Yes	Yes	No	No
CG2371	NM_167294	39.24	18.3933	0.468738	288	38.2615	Yes	Yes	Yes	No
klu	NM_001300095	0	1.23705	NA	1	-12.2419	No	No	No	No
RpL10Ab	NM_168480	1531.43	518.402	0.338509	4747	55.8429	Yes	Yes	Yes	No
Est-6	NM_001274820	0	0	NA	0	NA	No	No	No	No
atl	NM_170157	53.286	134.878	2.53121	553	62.3333	Yes	Yes	Yes	No
Ets98B	NM_079811	0	0	NA	0	NA	No	No	No	No
scaf	NM_165441	2.09708	4.18938	1.99772	10	51.4105	No	No	No	No
Aats-arg	NM_132853	45.4879	70.1226	1.54157	194	34.4428	Yes	Yes	Yes	No
CG10663	NM_001104123	0.0554779	0	0	0	NA	No	No	No	No
scat	NM_080166	40.1741	2.89767	0.0721276	187	48.8561	Yes	No	Yes	No
Ptpmeg	NM_167831	49.5171	1.77855	0.0359179	372	34.5368	Yes	No	Yes	No
Phae2	NM_001298942	0	0	NA	0	NA	No	No	No	No
betaTry	NM_001299385	0	26.6747	NA	0	NA	No	Yes	No	No
Crys	NM_001298925	0	0	NA	0	NA	No	No	No	No
betaCOP	NM_078676	30.7604	61.6218	2.00328	52	62.1551	Yes	Yes	No	No
CG11041	NM_137609	0	0	NA	0	NA	No	No	No	No
vlc	NM_001169585	123.264	97.5069	0.791042	539	39.165	Yes	Yes	Yes	No
CG11044	NM_137612	0	0	NA	0	NA	No	No	No	No
CG8526	NM_141696	4.34319	4.54481	1.04642	17	63.8205	No	No	No	No
CG8525	NM_136937	7.60248	9.5535	1.25663	55	24.3324	No	No	No	No
CG1291	NM_139515	22.785	22.0633	0.968326	74	61.604	Yes	Yes	No	No
HLH3B	NM_080316	0	0	NA	0	NA	No	No	No	No
Lpt	NM_138003	17.6219	3.65321	0.20731	136	43.4365	Yes	Yes	Yes	No
CG9922	NM_001275627	157.138	40.4571	0.257462	901	44.4023	Yes	Yes	Yes	No
CG1299	NM_139605	0.0820222	0	0	0	NA	No	No	No	No
CG2807	NM_001272908	23.4996	8.64141	0.367726	167	38.0378	Yes	Yes	Yes	No
CG15812	NM_079173	57.1007	4.84721	0.0848888	364	24.5191	Yes	No	Yes	No
CG15814	NM_133019	51.4951	17.5442	0.340696	42	41.486	Yes	Yes	No	No
CG15818	NM_135272	0	0	NA	0	NA	No	No	No	No
Cwc25	NM_134861	46.4707	4.33659	0.0933189	233	40.7196	Yes	No	Yes	No
PPO3	NM_080021	1.3394	1.09462	0.817248	6	71.3996	No	No	No	No
PPO2	NM_136599	0	0	NA	1	79.4619	No	No	No	No
CkIIbeta2	NM_058059	0	0	NA	0	NA	No	No	No	No
EMC8-9	NM_137887	92.3897	226.161	2.44791	349	76.0319	Yes	Yes	Yes	No
beta3GalTII	NM_136555	13.5305	8.64074	0.638614	129	48.57	Yes	No	Yes	No
CG6472	NM_137322	0.108826	0	0	0	NA	No	No	No	No
CG6470	NM_001298480	0.252873	3.03102	11.9863	1	-3.49718	No	No	No	No
CG6475	NM_001104389	0	0	NA	0	NA	No	No	No	No
Ir68a	NM_140198	0	0	NA	0	NA	No	No	No	No
CG6479	NM_140711	70.63	9.25238	0.130998	817	22.0965	Yes	Yes	Yes	No
sw	NM_057730	7.97863	3.88757	0.487248	0	NA	Yes	No	No	No
CG1124	NM_141252	71.0849	207.197	2.91478	542	55.0032	Yes	Yes	Yes	No
CG1126	NM_141242	0	0	NA	0	NA	No	No	No	No
cDIP	NM_142694	0	0	NA	0	NA	No	No	No	No
CG1129	NM_001300235	30.2413	26.876	0.888718	125	28.2736	Yes	Yes	Yes	No
Su(z)2	NM_001169663	3.2747	0	0	17	69.3737	Yes	No	No	No
Eig71Ei	NM_001274960	0	0	NA	0	NA	No	No	No	No
Eig71Eh	NM_140537	0	0	NA	0	NA	No	No	No	No
Eig71Ek	NM_140540	0	0	NA	0	NA	No	No	No	No
Eig71Ej	NM_140539	0	0	NA	0	NA	No	No	No	No
ND-B8	NM_144084	0	0	NA	1	33.1014	No	No	No	No
Eig71Ed	NM_079367	0	0	NA	0	NA	No	No	No	No
Eig71Eg	NM_079370	0	0	NA	0	NA	No	No	No	No
CG4186	NM_001300203	16.4076	38.6309	2.35445	171	46.3172	No	No	Yes	No
Eig71Ea	NM_079364	0	0	NA	0	NA	No	No	No	No
Eig71Ec	NM_079366	0	0	NA	0	NA	No	No	No	No
Eig71Eb	NM_079365	0	0	NA	0	NA	No	No	No	No
Nup153	NM_001103532	34.1023	17.8165	0.522441	279	65.3866	Yes	Yes	Yes	No
AP-2alpha	NM_057471	84.1283	61.3778	0.729574	433	37.7387	Yes	Yes	Yes	No
CG15227	NM_137675	0	0	NA	0	NA	No	No	No	No
CG15554	NM_143587	0	0	NA	0	NA	No	No	No	No
CapaR	NM_001275246	0	0	NA	0	NA	No	No	No	No
wry	NM_205889	0	0	NA	0	NA	No	No	No	No
Lsp1beta	NM_001298627	0	1.25944	NA	0	NA	No	No	No	No
CG15556	NM_143588	0	0	NA	0	NA	No	No	No	No
Nup154	NM_001298898	69.5841	40.4215	0.580902	543	71.9798	Yes	Yes	Yes	No
CG15550	NM_143578	0	0	NA	0	NA	No	No	No	No
CG10804	NM_001144678	0	0	NA	0	NA	No	No	No	No
CG10553	NM_143126	0	0	NA	0	NA	No	No	No	No
CG17270	NM_142658	48.489	0	0	376	19.7628	Yes	No	Yes	No
CG17271	NM_142659	65.2299	229.421	3.51711	503	75.5792	Yes	Yes	Yes	No
CG10801	NM_130702	0	0	NA	0	NA	No	No	No	No
CG10802	NM_130706	35.28	64.3003	1.82257	95	65.7962	Yes	Yes	No	No
CG10555	NM_001298087	35.0347	18.7233	0.534421	200	54.735	Yes	Yes	Yes	No
CG17278	NM_143973	1.26306	3.78485	2.99658	2	94.8257	No	No	No	No
CG10559	NM_143125	0	0	NA	0	NA	No	No	No	No
CG10809	NM_001169932	30.9756	8.53525	0.275547	201	40.7896	Yes	No	Yes	No
CG7987	NM_169587	53.9538	2.88194	0.0534149	385	38.789	Yes	Yes	Yes	No
CG7988	NM_142434	5.30613	0	0	54	43.8107	No	No	No	No
C3G	NM_176694	14.7191	10.6828	0.725776	118	53.1189	Yes	Yes	Yes	No
CG1440	NM_001298089	129.019	208.317	1.61463	617	44.797	Yes	Yes	Yes	No
AcCoAS	NM_168894	37.441	12.28	0.327983	277	36.1721	Yes	Yes	Yes	No
tra	NM_001014588	5.99434	0	0	53	26.2799	No	No	No	No
caps	NM_079332	3.48686	5.5726	1.59817	46	61.5652	No	No	No	No
CG14294	NM_142500	0	0	NA	0	NA	No	No	No	No
CG14079	NM_140834	0.160375	4.80576	29.9658	1	75.735	No	No	No	No
CG14071	NM_001259034	0	0	NA	0	NA	No	No	No	No
CG14070	NM_001298889	0	0	NA	0	NA	No	No	No	No
CG14073	NM_140803	33.4838	0.114999	0.00343447	128	41.9746	Yes	No	Yes	No
CG14072	NM_001259035	0	0	NA	0	NA	No	No	No	No
abd-A	NM_001260216	0.129252	0	0	0	NA	No	No	No	No
CG14074	NM_001259897	22.9565	8.36132	0.364225	128	32.947	Yes	No	Yes	No
CG11425	NM_141138	0	0	NA	0	NA	No	No	No	No
upd1	NM_080356	0.306758	2.45126	7.99087	19	41.3804	No	No	No	No
Cdc5	NM_138189	28.6519	15.25	0.532251	186	41.1419	Yes	Yes	Yes	No
Cdc6	NM_139990	73.2944	2.63709	0.0359795	436	31.6973	Yes	No	Yes	No
Cdc7	NM_167080	75.577	12.0975	0.160068	610	52.0675	Yes	Yes	Yes	No
CG12898	NM_136737	0	0	NA	0	NA	No	No	No	No
CG5973	NM_001169430	107.303	414.705	3.86481	914	33.4781	Yes	Yes	Yes	No
eIF3-S8	NM_001299616	151.05	41.3836	0.273973	637	56.3404	Yes	Yes	Yes	No
eIF3-S9	NM_166239	229.37	118.797	0.517927	1043	59.3062	Yes	Yes	Yes	No
ftz	NM_058150	0	0	NA	0	NA	No	No	No	No
CG12895	NM_001273939	48.9277	86.7548	1.77312	195	48.5831	Yes	Yes	Yes	No
CG12896	NM_136740	0.198834	0	0	0	NA	No	No	No	No
e(y)2	NM_080107	52.8486	154.085	2.91559	215	58.7113	Yes	Yes	Yes	No
e(y)3	NM_001272789	102.962	22.6324	0.219812	574	41.5038	Yes	Yes	Yes	No
e(y)1	NM_078667	34.6915	8.35359	0.240796	228	29.5311	Yes	No	Yes	No
CG34011	NM_001038789	0	0	NA	0	NA	No	No	No	No
CG34010	NM_001038794	0	0	NA	1	107.035	No	No	No	No
CG31064	NM_143288	4.84852	4.02783	0.830734	68	25.6602	Yes	Yes	No	No
CG43349	NM_001272934	0	0	NA	0	NA	No	No	No	No
CG43348	NM_001272933	0	0	NA	0	NA	No	No	No	No
CG9154	NM_001298733	12.5412	10.5696	0.842787	53	39.0038	No	No	No	No
CG42564	NM_141394	0.0838851	0	0	0	NA	No	No	No	No
CG42566	NM_001299811	0	0	NA	0	NA	No	No	No	No
CG32263	NM_168041	0	0	NA	0	NA	No	No	No	No
CG42561	NM_001169709	0	0	NA	1	21.8043	No	No	No	No
CG42562	NM_137401	0	0	NA	0	NA	No	No	No	No
CG32267	NM_168032	221.831	94.9618	0.428082	1655	52.3238	Yes	No	Yes	No
Cpr30F	NM_164879	0	0	NA	0	NA	No	No	No	No
Cpr30B	NM_135451	1.18335	10.638	8.98973	16	80.6851	No	No	No	No
pen-2	NM_001299637	49.9919	68.482	1.36986	248	31.2552	Yes	Yes	Yes	No
atms	NM_001275334	42.1581	28.4359	0.674506	180	66.0962	Yes	Yes	Yes	No
CG7236	NM_001298706	0	0	NA	0	NA	No	No	No	No
CG11601	NM_001298617	22.403	15.9615	0.712472	78	84.7519	Yes	Yes	No	No
CG11600	NM_141960	0	0	NA	0	NA	No	No	No	No
Hexim	NM_169595	71.3847	36.7713	0.515114	791	48.1485	Yes	Yes	Yes	No
CG11608	NM_141961	0	0	NA	0	NA	No	No	No	No
Ef1beta	NM_001299577	945.347	339.866	0.359514	6234	55.1056	Yes	Yes	Yes	No
w	NM_057439	6.77811	9.43017	1.39127	37	99.2754	Yes	Yes	No	No
Aats-tyr-m	NM_138123	22.474	22.2673	0.990803	47	63.5233	Yes	Yes	No	No
CG31739	NM_001273590	51.0553	15.9841	0.313075	364	35.9756	Yes	Yes	Yes	No
Dic4	NM_001275092	0	0	NA	0	NA	No	No	No	No
CG34451	NM_001259846	0	0	NA	0	NA	No	No	No	No
Tep5	NM_136144	0	0	NA	0	NA	No	No	No	No
Tep4	NM_001273662	1.66699	23.6443	14.1838	5	17.8202	No	Yes	No	No
CG7239	NM_135116	24.6519	1.09846	0.0445587	175	25.7036	Yes	No	Yes	No
Prosbeta2R1	NM_132039	0	0	NA	0	NA	No	No	No	No
CG15653	NM_137696	18.6908	15.777	0.844106	148	20.1923	No	No	Yes	No
CG15650	NM_001299726	0	0	NA	0	NA	No	No	No	No
Prosbeta2R2	NM_141258	0	0	NA	1	113.667	No	No	No	No
CG32085	NM_168470	0	0	NA	0	NA	No	No	No	No
CG32086	NM_168464	0	0	NA	1	41.0305	No	No	No	No
CG32087	NM_168474	0	0	NA	0	NA	No	No	No	No
CG32081	NM_168430	0	0	NA	0	NA	No	No	No	No
CG32082	NM_168448	0.153266	0	0	1	48.8911	No	No	No	No
CG15382	NM_134806	0.862394	0	0	5	43.8134	No	No	No	No
CG15385	NM_134810	0.142223	0	0	23	46.0178	No	No	No	No
CAH1	NM_078837	0	0	NA	0	NA	No	No	No	No
CG31687	NM_001273698	0.121158	0	0	0	NA	No	No	No	No
CG43965	NM_001274669	3723.86	6454.35	1.73324	7713	85.7262	Yes	Yes	Yes	No
Srp54	NM_057999	77.1993	12.7295	0.164891	605	35.5293	Yes	Yes	Yes	No
CG31681	NM_164473	0	0.980504	NA	2	61.2954	No	No	No	No
CG31680	NM_165333	0	0	NA	0	NA	No	No	No	No
Etf-QO	NM_136692	46.5442	130.782	2.80984	381	63.0921	Yes	Yes	Yes	No
CG31689	NM_164495	70.0263	52.0027	0.742617	961	60.567	Yes	Yes	Yes	No
CG43968	NM_001275309	0	0	NA	0	NA	No	No	No	No
jeb	NM_001273981	0	0	NA	0	NA	No	No	No	No
CG14380	NM_142005	0	0	NA	0	NA	No	No	No	No
CG13760	NM_130654	27.7094	0	0	250	23.5768	Yes	No	Yes	No
NFAT	NM_001169276	20.3026	5.8338	0.287343	144	36.9419	Yes	Yes	Yes	No
CG13766	NM_001298752	20.088	18.7093	0.931368	158	33.7641	Yes	Yes	Yes	No
CG18004	NM_165808	53.5645	0.884352	0.0165101	471	24.9203	Yes	No	Yes	No
Pallidin	NM_140237	26.5784	12.8718	0.484295	181	23.693	Yes	No	Yes	No
CG15036	NM_144273	0	0	NA	0	NA	No	No	No	No
CG15034	NM_001298051	0	0	NA	0	NA	No	No	No	No
CG15035	NM_132168	0	0	NA	0	NA	No	No	No	No
CG5791	NM_001316505	0	0	NA	0	NA	No	No	No	No
Or19b	NM_167690	0	0	NA	0	NA	No	No	No	No
CG3225	NM_135016	8.0357	7.35254	0.914985	63	31.2284	Yes	Yes	No	No
Or19a	NM_080274	0	0	NA	0	NA	No	No	No	No
CG33687	NM_001031959	0	0	NA	0	NA	No	No	No	No
CG33689	NM_001031961	0	0	NA	0	NA	No	No	No	No
CG33688	NM_001031960	0	0	NA	0	NA	No	No	No	No
CG9601	NM_141535	32.1129	10.0788	0.313856	81	40.2166	Yes	Yes	No	No
ND-B12	NM_001169769	153.325	172.939	1.12792	705	57.6841	Yes	Yes	Yes	No
CG3594	NM_079131	25.3132	31.1725	1.23147	99	38.0565	Yes	Yes	No	No
CG6118	NM_001104336	0.0427067	0	0	0	NA	No	No	No	No
CG9609	NM_132933	84.4384	2.51454	0.0297796	382	30.4875	Yes	No	Yes	No
CG6115	NM_001299072	60.9425	129.94	2.13218	723	48.877	Yes	Yes	Yes	No
crol	NM_164971	48.6221	2.54127	0.0522658	436	34.6903	Yes	No	Yes	No
CG3760	NM_001259584	117.485	194.338	1.65414	549	54.915	Yes	Yes	Yes	No
CG14325	NM_142384	0	0	NA	0	NA	No	No	No	No
CG13659	NM_143121	0	0	NA	1	9.46882	No	No	No	No
CG3764	NM_001275048	27.2005	1.00524	0.0369567	152	25.5748	Yes	No	Yes	No
Acp53Ea	NM_057803	0	0	NA	0	NA	No	No	No	No
CG5828	NM_001273156	96.1197	107.879	1.12234	400	38.0209	Yes	Yes	Yes	No
CG3984	NM_142163	0	2.33528	NA	1	76.5448	No	No	No	No
Hcf	NM_205873	51.0751	26.0825	0.51067	535	45.5196	Yes	Yes	Yes	No
CG3987	NM_142164	0.104622	1.25403	11.9863	0	NA	No	No	No	No
aay	NM_079277	78.9137	238.386	3.02084	249	56.5027	Yes	Yes	Yes	No
uex	NM_001110921	137.176	15.4724	0.112792	810	35.5333	Yes	Yes	Yes	No
Rcd-1	NM_001272793	91.4138	122.884	1.34426	898	42.441	Yes	Yes	Yes	No
CG6567	NM_001104272	44.6418	26.6435	0.596828	252	59.0886	Yes	Yes	Yes	No
Ctf4	NM_137077	44.2168	71.9953	1.62823	277	65.6018	Yes	Yes	Yes	No
CG7609	NM_170424	31.4318	27.8246	0.885236	230	50.1427	Yes	Yes	Yes	No
CG7607	NM_140192	1.34235	0	0	1	157.86	No	No	No	No
CG7606	NM_001316519	0	0	NA	0	NA	No	No	No	No
CG7601	NM_143460	37.5736	80.8152	2.15085	143	97.8054	Yes	Yes	Yes	No
CG7600	NM_140196	27.9663	1.86822	0.0668026	161	31.9581	Yes	No	Yes	No
Mst33A	NM_058117	0	0	NA	0	NA	No	No	No	No
Rad51D	NM_133074	14.3904	11.4299	0.794273	127	23.1225	Yes	No	Yes	No
Rad51C	NM_136622	1.26831	3.04048	2.39726	0	NA	No	No	No	No
Aats-his	NM_001272757	82.5648	62.4183	0.755992	473	85.4435	Yes	Yes	Yes	No
CG14926	NM_001298912	0	0	NA	0	NA	No	No	No	No
Ir10a	NM_001103479	0	0	NA	0	NA	No	No	No	No
CG14921	NM_135647	0	0	NA	1	99.8924	No	No	No	No
Fer2LCH	NM_170483	269.916	2011.69	7.45302	1369	78.4161	Yes	Yes	Yes	No
LSm7	NM_135963	123.177	317.486	2.57747	474	73.6439	Yes	Yes	Yes	No
LSm1	NM_137715	62.2819	124.422	1.99772	349	57.0985	Yes	Yes	Yes	No
CG14929	NM_135663	0	0	NA	0	NA	No	No	No	No
CG10237	NM_001273648	245.729	737.184	2.99999	442	81.833	Yes	Yes	Yes	No
hgo	NM_078820	0	0	NA	0	NA	No	No	No	No
CG10232	NM_142918	0	0	NA	0	NA	No	No	No	No
Eaf6	NM_139724	42.8927	30.2426	0.705077	203	40.9942	Yes	Yes	Yes	No
Klp61F	NM_057470	43.9807	36.8599	0.838092	494	45.9675	Yes	Yes	Yes	No
Dlic	NM_167274	107.16	62.7433	0.58551	722	51.8527	Yes	Yes	Yes	No
Nmnat	NM_143058	18.6092	3.26105	0.175238	129	29.5254	Yes	No	Yes	No
CG17715	NM_001042945	11.7953	0	0	0	NA	No	No	No	No
CG17717	NM_132099	0	0	NA	0	NA	No	No	No	No
CG17712	NM_134775	32.3188	23.7983	0.73636	202	37.6672	Yes	Yes	Yes	No
CG12560	NM_001298807	7.60791	5.69942	0.749144	25	50.027	No	No	No	No
Brca2	NM_138081	35.0005	0	0	224	40.8924	Yes	No	Yes	No
CG12567	NM_001170363	117.092	24.6228	0.210286	74	36.0391	Yes	No	No	No
Dhx15	NM_136425	34.5721	45.3987	1.31316	164	55.8561	Yes	Yes	Yes	No
l(1)G0004	NM_134543	26.0794	81.4051	3.12143	182	42.2367	Yes	Yes	Yes	No
Pp2B-14D	NM_001258786	33.7877	51.8317	1.53404	334	77.9783	Yes	Yes	Yes	No
l(1)G0007	NM_132719	22.2956	9.68853	0.434549	80	82.8705	Yes	Yes	No	No
CG34325	NM_001298418	2.2387	5.96306	2.66362	7	37.5207	No	No	No	No
exd	NM_001272663	91.2164	57.4379	0.629688	1025	30.4117	Yes	Yes	Yes	No
CG34456	NM_001104089	0	0	NA	0	NA	No	No	No	No
asun	NM_079655	19.1275	9.40216	0.491552	123	43.0972	Yes	Yes	Yes	No
CG43251	NM_001259921	0	0	NA	0	NA	No	No	No	No
exu	NM_001169747	476.288	378.206	0.79407	5249	22.5765	Yes	Yes	Yes	No
CG1468	NM_132357	0	2.55858	NA	5	29.9798	No	No	No	No
Sec31	NM_001299286	27.3613	70.8363	2.58893	185	76.6105	Yes	Yes	Yes	No
CG34452	NM_001300144	0	0	NA	0	NA	No	No	No	No
CG1461	NM_001298309	0	0	NA	0	NA	No	No	No	No
CG1463	NM_132585	18.7711	1.52024	0.0809885	105	33.0827	Yes	No	Yes	No
CG14324	NM_169766	0	0	NA	0	NA	No	No	No	No
CG10793	NM_130698	0	0	NA	7	40.6608	No	No	No	No
CG34436	NM_001104484	0	0	NA	0	NA	No	No	No	No
Cyp4d20	NM_139466	0	0	NA	0	NA	No	No	No	No
Pino	NM_001272925	54.142	9.40526	0.173715	648	13.687	Yes	No	Yes	No
CG43089	NM_001300001	0	0	NA	0	NA	No	No	No	No
Vha16-3	NM_001202157	0	0	NA	0	NA	No	No	No	No
Reck	NM_140476	0.269487	0	0	1	15.2852	No	No	No	No
CG5111	NM_143145	0	0	NA	0	NA	No	No	No	No
CG5110	NM_001259133	32.2526	184.304	5.7144	142	65.7345	Yes	Yes	Yes	No
CG31644	NM_001298711	0	0	NA	0	NA	No	No	No	No
Gyk	NM_079916	19.6012	15.8495	0.8086	48	39.1949	Yes	Yes	No	No
CG5114	NM_001259831	26.8753	1.70142	0.0633079	178	24.0724	Yes	No	Yes	No
CG32444	NM_168930	0	2.06155	NA	2	81.837	No	No	No	No
Alas	NM_057933	30.3548	11.1665	0.367866	200	28.6722	Yes	Yes	Yes	No
CG32445	NM_168931	0	0	NA	0	NA	No	No	No	No
CG1603	NM_001273849	30.2754	0	0	108	27.1323	Yes	No	Yes	No
CG1602	NM_136447	12.8833	0	0	42	29.155	Yes	No	No	No
CG1607	NM_143608	0	0	NA	1	84.1741	No	No	No	No
CG32447	NM_001275259	0	0	NA	1	64.7872	No	No	No	No
CG42692	NM_001201875	0	0	NA	0	NA	No	No	No	No
BicD	NM_001273601	92.6729	10.803	0.116572	407	48.6109	Yes	Yes	Yes	No
Hs2st	NM_057991	32.7871	2.19143	0.0668381	365	28.6292	Yes	No	Yes	No
Pvr	NM_205927	0.979433	4.07631	4.16191	8	77.0286	No	Yes	No	No
Mur82C	NM_141224	0	0	NA	0	NA	No	No	No	No
sigmar	NM_166622	66.2737	0	0	396	35.06	Yes	No	Yes	No
bip2	NM_143666	90.2376	3.50264	0.0388157	452	34.7423	Yes	Yes	Yes	No
bip1	NM_139912	55.8052	3.01849	0.0540898	359	34.2146	Yes	No	Yes	No
crq	NM_175943	120.945	136.26	1.12663	820	54.0033	Yes	Yes	Yes	No
CG13168	NM_206101	0	0	NA	0	NA	No	No	No	No
Or85c	NM_079556	0	0	NA	0	NA	No	No	No	No
Or85b	NM_079555	0	0	NA	0	NA	No	No	No	No
CG13164	NM_165873	0	0	NA	0	NA	No	No	No	No
CG34221	NM_001299343	1.30591	28.6972	21.9749	35	43.6393	No	No	No	No
LysD	NM_057475	0	11.7503	NA	0	NA	No	No	No	No
CG13163	NM_001299413	26.1048	18.0086	0.689859	94	50.6578	Yes	Yes	No	No
Or85e	NM_001275445	0	0	NA	0	NA	No	No	No	No
Or85d	NM_079557	0	0	NA	0	NA	No	No	No	No
crb	NM_001260355	22.2088	74.6582	3.36165	405	29.4516	Yes	Yes	Yes	No
crc	NM_165374	201.895	1.72485	0.00854334	1084	74.8818	Yes	No	Yes	No
CG2065	NM_001273858	0.28578	0	0	2	40.2256	No	No	No	No
LysP	NM_057480	0	0	NA	0	NA	No	No	No	No
Drl-2	NM_001299442	0	0	NA	0	NA	No	No	No	No
crn	NM_057770	29.1837	16.6743	0.571355	179	25.9686	Yes	Yes	Yes	No
CG45105	NM_001300418	0	0	NA	0	NA	No	No	No	No
crm	NM_166951	56.2126	12.3468	0.219644	600	45.9807	Yes	Yes	Yes	No
CG11836	NM_170199	35.8601	8.22078	0.229246	222	43.5859	Yes	No	Yes	No
sev	NM_078559	0.256095	0.671481	2.622	1	32.1045	No	No	No	No
CG11835	NM_001298620	0	0.312436	NA	0	NA	No	No	No	No
312	NM_138261	37.1425	9.72526	0.261837	191	30.124	Yes	No	Yes	No
CG11839	NM_170198	29.4911	26.5627	0.900705	97	55.2965	Yes	Yes	No	No
Zmynd10	NM_140368	0.279981	0	0	1	93.096	No	No	No	No
XRCC1	NM_131989	33.7475	0.8139	0.0241173	193	32.2772	Yes	No	Yes	No
sel	NM_136703	73.5998	5.61904	0.0763459	403	29.303	Yes	No	Yes	No
Cyp28d1	NM_135068	0.751861	1.50201	1.99772	7	37.8188	No	No	No	No
sei	NM_001299885	9.53588	0.580203	0.0608442	54	47.8547	Yes	No	No	No
Cyp28d2	NM_135067	0	0	NA	2	127.445	No	No	No	No
CG4646	NM_001299453	55.9789	125.602	2.24374	239	39.3058	Yes	Yes	Yes	No
CG8778	NM_136961	44.1654	81.6413	1.84854	171	103.106	Yes	Yes	Yes	No
CG4645	NM_001298242	33.3915	114.557	3.43071	184	45.0299	Yes	Yes	Yes	No
CG30103	NM_166233	0	0	NA	0	NA	No	No	No	No
CG30101	NM_137361	0.13008	0	0	6	60.2418	No	No	No	No
CG8773	NM_142016	0.249169	0.995537	3.99543	0	NA	No	No	No	No
CG8771	NM_001259354	17.1706	24.2132	1.41015	108	67.326	Yes	Yes	Yes	No
CG8777	NM_136608	2.23612	4.00041	1.789	18	42.5969	No	Yes	No	No
CG8774	NM_169502	0	0	NA	0	NA	No	No	No	No
tho2	NM_134802	27.9294	16.6187	0.595027	197	61.6206	Yes	Yes	Yes	No
Pp1alpha-96A	NM_001275990	77.5157	26.5912	0.343042	338	33.3006	Yes	Yes	Yes	No
Cctgamma	NM_169727	166.563	300.025	1.80127	505	76.9806	Yes	Yes	Yes	No
nopo	NM_001274142	54.5812	30.8488	0.56519	232	47.8117	Yes	Yes	Yes	No
Fas1	NM_001275716	64.2163	166.772	2.59703	225	55.3391	Yes	Yes	Yes	No
Jon99Fi	NM_143543	0	0	NA	0	NA	No	No	No	No
sip1	NM_001298707	9.17838	10.0551	1.09552	64	63.814	Yes	Yes	No	No
CG43288	NM_001258593	0	0	NA	1	93.6666	No	No	No	No
sip3	NM_001276223	30.0885	13.5643	0.450812	297	36.7108	Yes	Yes	Yes	No
CG13575	NM_138059	0	0	NA	0	NA	No	No	No	No
CG31475	NM_169851	0.100982	0	0	1	102.949	No	No	No	No
CG13577	NM_138061	0	0	NA	0	NA	No	No	No	No
VGlut	NM_001273010	0	0	NA	0	NA	No	No	No	No
ND-20	NM_001298384	102.89	193.291	1.87862	818	66.6841	Yes	Yes	Yes	No
ND-23	NM_079980	104.934	172.944	1.64812	874	66.7263	Yes	Yes	Yes	No
ND-24	NM_133000	78.8034	197.949	2.51194	432	68.0782	Yes	Yes	Yes	No
CG17333	NM_132428	44.5005	47.1274	1.05903	357	28.8145	Yes	Yes	Yes	No
CG42779	NM_001300441	0	0	NA	0	NA	No	No	No	No
CG42778	NM_001202289	0	0	NA	0	NA	No	No	No	No
Ced-12	NM_135704	30.7437	18.5627	0.603788	174	29.5153	Yes	Yes	Yes	No
CG42811	NM_001202350	0	0	NA	0	NA	No	No	No	No
FKBP59	NM_001298855	161.234	502.13	3.1143	148	111.812	Yes	Yes	Yes	No
CG3517	NM_142550	0	0	NA	0	NA	No	No	No	No
[truncated: 10,405 more rows]

## Sheet: Stage 13 oocytes wt
Supplementary File 2C. Processed RNA-seq, ribosome profiling, and PAL-seq data for wild-type stage 13 oocytes.
Otherwise, this table is as in Supplementary File 2A.
Gene name	Initial Refseq ID	RNA (RPKM)	RPF (RPKM)	TE	Poly(A) tags	Mean poly(A)-tail length	Passing RNA cutoff (>=10 RPM)	Passing RPF cutoff(>=10 RPM)	Passing poly(A)-tag cutoff (>=100 tags)	Excluded from analysis
CG11790	NM_170192	72.6891	21.5441	0.296387	372	58.1633	Yes	Yes	Yes	No
CG11796	NM_140968	0	0	NA	0	NA	No	No	No	No
CG12081	NM_001272414	32.5461	0.490612	0.0150744	299	42.1687	Yes	No	Yes	No
CG13321	NM_001299438	0.460185	0	0	5	42.8935	No	No	No	No
CG13322	NM_165963	43.8994	7.7604	0.176777	356	35.6509	Yes	No	Yes	No
CG13323	NM_001299441	0	0	NA	0	NA	No	No	No	No
CG13324	NM_136989	0	7.89053	NA	0	NA	No	No	No	No
CG13325	NM_001299444	0	0	NA	0	NA	No	No	No	No
CG13326	NM_136994	0	0	NA	0	NA	No	No	No	No
CG14247	NM_143245	0	0	NA	0	NA	No	No	No	No
rictor	NM_133143	28.137	5.93742	0.211018	162	51.0558	Yes	Yes	Yes	No
CG4101	NM_140651	24.4156	10.6559	0.436439	247	51.9026	No	No	Yes	No
Syt1	NM_001273037	0	0	NA	61	46.8432	No	No	No	No
SPR	NM_001297964	0	0	NA	0	NA	No	No	No	No
snRNP-U1-70K	NM_001273244	63.7842	8.79092	0.137823	254	49.3515	Yes	Yes	Yes	No
Syt4	NM_058116	0.0904751	0	0	0	NA	No	No	No	No
CG8654	NM_001299695	0	0	NA	0	NA	No	No	No	No
Syt7	NM_205871	0.620465	0	0	4	56.2993	No	No	No	No
Sac1	NM_138243	60.3669	15.8267	0.262175	370	66.1771	Yes	Yes	Yes	No
Cyp6a19	NM_001299505	328.358	217.976	0.663835	2015	60.4284	Yes	Yes	Yes	No
Cyp6a18	NM_001300633	0	0.773529	NA	0	NA	No	No	No	No
Cyp6a17	NM_001299504	0.0854418	0.391546	4.58261	0	NA	No	No	No	No
Cyp6a16	NM_001298702	0.0862713	1.97674	22.913	0	NA	No	No	No	No
Cyp6a14	NM_001299270	1.26255	7.32864	5.80463	12	67.0087	No	Yes	No	No
Cyp6a13	NM_136546	2.25872	1.99054	0.88127	15	64.1424	No	No	No	No
bocks	NM_001014611	34.8329	13.3847	0.384256	144	45.7145	Yes	Yes	Yes	No
eIF2B-epsilon	NM_206606	21.0724	2.03604	0.0966212	125	42.9082	Yes	No	Yes	No
Tektin-C	NM_001274520	0	0	NA	0	NA	No	No	No	No
Tektin-A	NM_001273547	0	0	NA	0	NA	No	No	No	No
CG13492	NM_166487	0	0	NA	0	NA	No	No	No	No
CG31710	NM_001273365	1.15904	0	0	11	72.6155	No	No	No	No
CG31712	NM_001273379	19.3173	3.54094	0.183304	365	47.0564	Yes	No	Yes	No
CG31715	NM_164917	121.647	146.131	1.20127	467	57.1138	Yes	Yes	Yes	No
NimB5	NM_001298990	0	0	NA	0	NA	No	No	No	No
CG13494	NM_137777	0	0	NA	0	NA	No	No	No	No
shtd	NM_132797	22.0891	8.96221	0.405729	265	42.2702	Yes	Yes	Yes	No
CG4049	NM_138041	25.5077	0.344813	0.013518	265	39.3614	Yes	No	Yes	No
CG4041	NM_131969	21.8351	1.65587	0.0758351	116	48.7093	Yes	No	Yes	No
CG4042	NM_001275192	42.1889	7.08188	0.167861	204	68.0179	Yes	No	Yes	No
CG4045	NM_130622	24.156	0	0	224	29.0579	Yes	No	Yes	No
14-3-3zeta	NM_165742	300.924	427.773	1.42153	1771	41.0644	Yes	Yes	Yes	No
FeCH	NM_170579	60.7951	40.8231	0.671487	552	47.4046	Yes	Yes	Yes	No
Oli	NM_078868	0	0	NA	0	NA	No	No	No	No
Gp210	NM_001273785	41.1928	98.7776	2.39793	196	84.9437	Yes	Yes	Yes	No
CG31698	NM_001298647	0	0	NA	9	21.9806	No	No	No	No
Prp38	NM_136619	26.1207	16.3229	0.624901	124	38.1433	Yes	Yes	Yes	No
RpL24-like	NM_141816	224.919	35.7662	0.159018	1727	38.2566	Yes	Yes	Yes	No
Rtf1	NM_001299788	70.8847	7.50778	0.105915	383	61.0105	Yes	Yes	Yes	No
CG14569	NM_141097	0	0	NA	0	NA	No	No	No	No
CG14568	NM_141098	0	0	NA	0	NA	No	No	No	No
CG14567	NM_141100	0	0	NA	2	23.9128	No	No	No	No
CG14566	NM_141101	0	0	NA	0	NA	No	No	No	No
CG14565	NM_141103	0	0	NA	1	50.4642	No	No	No	No
CG14564	NM_141104	0	0	NA	0	NA	No	No	No	No
CG14563	NM_141112	0	0	NA	0	NA	No	No	No	No
CG14562	NM_001275270	16.5835	1.99988	0.120595	130	45.7988	Yes	No	Yes	No
CG14561	NM_001275272	44.4131	0	0	734	24.4237	Yes	No	Yes	No
CG13185	NM_001103809	6.70518	0.0344862	0.00514322	62	42.3743	Yes	No	No	No
vig2	NM_170206	292.018	8.15101	0.0279127	2923	43.7667	Yes	No	Yes	No
CG8204	NM_137206	21.4938	40.2944	1.8747	80	43.4486	No	Yes	No	No
CG10674	NM_139693	71.8575	133.776	1.86168	472	53.3306	Yes	Yes	Yes	No
CG10672	NM_139689	37.9815	58.0181	1.52754	279	62.5517	Yes	Yes	Yes	No
Mst77F	NM_079464	0	0	NA	0	NA	No	No	No	No
CG12811	NM_141715	50.2483	93.3245	1.85727	93	89.7904	Yes	Yes	No	No
Pif2	NM_169147	0	0	NA	0	NA	No	No	No	No
CG12814	NM_001043235	0.105695	2.4218	22.913	2	63.5164	No	No	No	No
CG12817	NM_001043236	0	0	NA	0	NA	No	No	No	No
CG12818	NM_141739	21.7744	13.2579	0.608878	87	46.011	Yes	Yes	No	No
CG18446	NM_136685	35.1919	0	0	271	40.034	Yes	No	Yes	No
CG8209	NM_139910	68.7769	227.795	3.31209	159	82.7749	Yes	Yes	Yes	No
H15	NM_001298698	0.193373	0	0	3	129.303	No	No	No	No
nocte	NM_001272480	53.5796	69.8918	1.30445	287	66.11	Yes	Yes	Yes	No
Dhap-at	NM_001276028	18.7077	2.88167	0.154037	117	49.9747	Yes	No	Yes	No
CG14309	NM_142461	1.48359	2.99943	2.02174	16	21.785	No	No	No	No
Acp63F	NM_079182	0	0	NA	0	NA	No	No	No	No
CG14302	NM_142492	7.49417	78.9885	10.54	73	50.7598	No	Yes	No	No
CG14301	NM_142477	0	0	NA	48	-1.89447	No	No	No	No
CG14300	NM_001014639	0	0	NA	0	NA	No	No	No	No
CG7246	NM_132292	30.6234	8.10249	0.264585	185	48.8437	Yes	Yes	Yes	No
CG7248	NM_140273	0	0	NA	0	NA	No	No	No	No
wtrw	NM_206459	2.82055	2.54592	0.902634	31	54.6194	No	No	No	No
FMRFaR	NM_001299996	0	0	NA	0	NA	No	No	No	No
Arl5	NM_139944	99.2687	53.5187	0.53913	455	47.2408	Yes	Yes	Yes	No
nullo	NM_078512	0	0	NA	0	NA	No	No	No	No
CG15919	NM_144117	0	0	NA	1	45.9167	No	No	No	No
CG9689	NM_132359	0	0	NA	0	NA	No	No	No	No
CG3906	NM_137958	0	0	NA	0	NA	No	No	No	No
CG3907	NM_138026	3.34475	4.44997	1.33043	25	47.1208	No	No	No	No
CG3902	NM_140812	96.3995	10.0183	0.103925	744	21.9934	Yes	Yes	Yes	No
Br140	NM_001299226	46.3837	3.22465	0.0695212	221	62.0515	Yes	Yes	Yes	No
CG9682	NM_143528	0	0	NA	0	NA	No	No	No	No
CG9684	NM_141540	64.4196	22.1483	0.343813	243	48.0355	Yes	Yes	Yes	No
CG9686	NM_132358	0	0	NA	0	NA	No	No	No	No
CG42870	NM_001202336	0	0	NA	0	NA	No	No	No	No
CG42876	NM_001299036	0	0	NA	0	NA	No	No	No	No
CG4557	NM_132132	16.7709	6.21465	0.370561	159	43.8199	Yes	Yes	Yes	No
p47	NM_136440	128.748	145.194	1.12774	773	82.8772	Yes	Yes	Yes	No
Gr66a	NM_079247	0	0	NA	0	NA	No	No	No	No
CG42878	NM_001259507	0	0	NA	0	NA	No	No	No	No
CG2051	NM_141330	111.942	243.07	2.1714	299	112.502	Yes	Yes	Yes	No
dnd	NM_142738	2.28496	0	0	16	53.7947	No	No	No	No
CG2053	NM_001300703	0	0	NA	0	NA	No	No	No	No
dnc	NM_166968	48.1838	0.392895	0.0081541	173	63.6656	Yes	No	Yes	No
CG7024	NM_131954	0.0894987	0	0	1	69.3205	No	No	No	No
CG2059	NM_132160	32.6257	0.650047	0.0199244	298	29.3864	Yes	No	Yes	No
lmd	NM_170044	0	0	NA	0	NA	No	No	No	No
CG7029	NM_176542	29.0074	2.30895	0.0795986	202	50.4158	Yes	Yes	Yes	No
CG7028	NM_001299955	39.2779	3.81615	0.0971577	224	50.9729	Yes	Yes	Yes	No
dnk	NM_001275793	282.429	43.7908	0.155051	542	43.9026	Yes	Yes	Yes	No
Gr97a	NM_001300622	0	0	NA	0	NA	No	No	No	No
CaMKI	NM_079883	89.4681	33.6783	0.376428	427	60.4139	Yes	Yes	Yes	No
dnt	NM_001273638	17.5113	1.33746	0.0763768	79	39.8368	Yes	No	No	No
Jon44E	NM_001299274	0	0	NA	0	NA	No	No	No	No
Ostgamma	NM_135360	47.888	94.3099	1.96938	156	95.0671	Yes	Yes	Yes	No
BoYb	NM_141173	15.0635	4.91772	0.326465	93	46.8041	Yes	Yes	No	No
CG5089	NM_137298	0	0	NA	0	NA	No	No	No	No
CheA84a	NM_001031979	0	0	NA	0	NA	No	No	No	No
CG3347	NM_164530	0	0	NA	0	NA	No	No	No	No
CG5080	NM_164406	5.39209	6.35396	1.17838	97	73.8728	No	Yes	No	No
CG5087	NM_140022	19.5563	5.3664	0.274407	104	52.5593	Yes	Yes	Yes	No
CG5084	NM_001299627	0	0	NA	0	NA	No	No	No	No
CG1979	NM_141428	0	0	NA	0	NA	No	No	No	No
M1BP	NM_141568	37.6199	0.944641	0.0251102	348	28.0274	Yes	No	Yes	No
CG1971	NM_143643	21.9634	3.07327	0.139927	127	38.3866	Yes	No	Yes	No
CG45061	NM_001298134	0	0	NA	0	NA	No	No	No	No
CG9356	NM_141632	35.5849	7.47228	0.209985	190	45.0026	Yes	No	Yes	No
CG11231	NM_143696	0	0	NA	8	48.1779	No	No	No	No
CG11236	NM_135231	0	0	NA	0	NA	No	No	No	No
CG16956	NM_135810	126.891	561.799	4.4274	640	53.1598	Yes	Yes	Yes	No
CG8331	NM_001201998	211.667	726.451	3.43205	715	85.1636	Yes	Yes	Yes	No
CG8336	NM_168354	39.6239	3.10394	0.0783351	216	48.4857	Yes	No	Yes	No
CG16952	NM_206740	33.5737	10.909	0.324928	243	59.3764	Yes	Yes	Yes	No
CG8335	NM_136366	0	0	NA	0	NA	No	No	No	No
MrgBP	NM_136573	48.1056	14.3548	0.298402	307	52.649	Yes	No	Yes	No
CG16959	NM_140493	0.0850911	0	0	4	37.8235	No	No	No	No
pinta	NM_001300537	22.5602	2.95384	0.130932	94	45.0761	Yes	No	No	No
CG33125	NM_175950	0	0	NA	0	NA	No	No	No	No
CG45095	NM_001300590	0	0	NA	0	NA	No	No	No	No
Sox102F	NM_001014695	2.1342	0	0	20	34.9943	No	No	No	No
FRG1	NM_140945	29.4595	8.48579	0.288049	172	24.9857	Yes	No	Yes	No
cype	NM_001258957	439.468	1195.95	2.72136	1573	90.0367	Yes	Yes	Yes	No
yata	NM_001276153	38.0658	4.87636	0.128103	230	53.1302	Yes	Yes	Yes	No
ND-20L	NM_001300655	0	0	NA	0	NA	No	No	No	No
Dbx	NM_139420	0.0571706	0	0	0	NA	No	No	No	No
s-cup	NM_136948	0	0	NA	8	76.1262	No	No	No	No
how	NM_001275893	33.6002	33.0624	0.983995	228	38.8039	Yes	Yes	Yes	No
CG9531	NM_135187	14.0325	0	0	88	21.729	Yes	No	No	No
CG9536	NM_135189	40.0038	3.9377	0.098433	465	39.2742	Yes	No	Yes	No
hop	NM_078564	36.2069	1.47268	0.040674	231	46.0985	Yes	No	Yes	No
CG6379	NM_001297922	15.0873	0.246047	0.0163082	102	36.0164	Yes	No	Yes	No
ppk31	NM_001104474	0	0	NA	0	NA	No	No	No	No
ppk30	NM_001276147	0	0	NA	0	NA	No	No	No	No
CG1358	NM_136457	21.6083	14.2625	0.660046	103	52.5797	Yes	Yes	Yes	No
CG8485	NM_137098	56.6273	0	0	295	38.4853	Yes	No	Yes	No
CG1354	NM_167202	137.018	15.4483	0.112747	839	66.3469	Yes	Yes	Yes	No
CG8481	NM_001014612	36.2736	24.583	0.677709	330	45.8304	Yes	Yes	Yes	No
smt3	NM_058063	1013.08	1510.87	1.49137	2428	55.0361	Yes	Yes	Yes	No
BG642163	NM_001298675	0	0	NA	0	NA	No	No	No	No
Edg91	NM_079666	0	0	NA	0	NA	No	No	No	No
CG30091	NM_166110	0.0812562	0	0	0	NA	No	No	No	No
CG30090	NM_166112	0	0	NA	0	NA	No	No	No	No
CG30095	NM_166143	0	0	NA	0	NA	No	No	No	No
CG30094	NM_166149	31.6715	24.8434	0.78441	141	49.6635	Yes	Yes	Yes	No
CG30096	NM_166162	19.9861	6.54203	0.327329	98	35.3485	Yes	No	No	No
eIF-1A	NM_001300457	308.031	354.691	1.15148	1191	81.6583	Yes	Yes	Yes	No
Myo10A	NM_001042804	0.861335	0	0	8	50.2542	No	No	No	No
Nup43	NM_142459	50.3912	80.49	1.5973	217	75.9709	Yes	Yes	Yes	No
Spp	NM_078720	57.8697	50.392	0.870783	240	54.1576	Yes	Yes	Yes	No
Patronin	NM_001144218	24.493	1.73034	0.0706465	212	40.9815	Yes	No	Yes	No
Usp8	NM_142691	31.4188	0.431724	0.0137409	154	45.9318	Yes	No	Yes	No
Usp1	NM_143430	51.0963	19.6768	0.385093	277	74.3969	Yes	Yes	Yes	No
Usp2	NM_001258871	19.9621	1.64826	0.0825695	171	62.3037	Yes	No	Yes	No
Usp5	NM_139516	70.0727	168.404	2.40328	256	75.4612	Yes	Yes	Yes	No
Usp7	NM_132551	68.8315	155.154	2.25411	526	83.8015	Yes	Yes	Yes	No
CG17571	NM_001299167	0	0	NA	0	NA	No	No	No	No
CG17570	NM_136266	0	0	NA	1	45.0267	No	No	No	No
CG17572	NM_136097	0	0	NA	0	NA	No	No	No	No
CG17575	NM_001201988	0	0	NA	0	NA	No	No	No	No
Set1	NM_001110936	30.9477	1.75377	0.0566687	311	59.4733	Yes	No	Yes	No
Set2	NM_132660	39.8182	0.242971	0.006102	240	40.1451	Yes	No	Yes	No
Spn27A	NM_001273214	41.8203	18.0632	0.431924	68	68.0585	Yes	Yes	No	No
Mis12	NM_139809	35.8663	41.3776	1.15366	262	44.7739	Yes	Yes	Yes	No
inaD	NM_001259541	0.0618614	0	0	0	NA	No	No	No	No
inaE	NM_001298302	30.9845	0.799193	0.0257933	0	NA	Yes	No	No	No
Set8	NM_169577	67.4823	11.2555	0.166792	191	60.5697	Yes	Yes	Yes	No
inaC	NM_057515	0	0	NA	0	NA	No	No	No	No
CG9825	NM_137879	0	0	NA	0	NA	No	No	No	No
Pcf11	NM_137155	18.8788	4.61016	0.244198	61	49.9056	Yes	Yes	No	No
CG9826	NM_206202	0	0	NA	0	NA	No	No	No	No
CG9821	NM_001275461	408.006	21.1667	0.0518785	1648	50.5434	Yes	Yes	Yes	No
ATPsynbetaL	NM_140579	0	0	NA	0	NA	No	No	No	No
CG9822	NM_137737	0	0	NA	0	NA	No	No	No	No
CG44270	NM_001299176	0	0	NA	0	NA	No	No	No	No
CG44271	NM_001298760	0	0	NA	0	NA	No	No	No	No
Vsx1	NM_001297969	0	0	NA	0	NA	No	No	No	No
CG31717	NM_001273388	35.0091	84.7569	2.421	79	54.2377	Yes	Yes	No	No
Hil	NM_166402	1.03368	0.473694	0.458261	6	35.1682	No	No	No	No
Him	NM_133045	0	0	NA	0	NA	No	No	No	No
MRP	NM_205980	47.3273	5.70091	0.120457	684	36.1383	Yes	Yes	Yes	No
Tsp68C	NM_168558	0	0	NA	0	NA	No	No	No	No
PH4alphaNE2	NM_170499	0	0	NA	0	NA	No	No	No	No
CG43131	NM_001259995	0	0	NA	0	NA	No	No	No	No
CG43133	NM_001258806	0	0	NA	0	NA	No	No	No	No
CG43134	NM_001258595	4974.25	59808	12.0235	21602	55.4222	Yes	Yes	Yes	No
CG43135	NM_001258596	64.2613	298.26	4.64136	741	80.5056	No	Yes	Yes	No
CG43136	NM_001258609	0	0	NA	0	NA	No	No	No	No
CG43137	NM_001258610	0	0	NA	0	NA	No	No	No	No
CG43138	NM_001258634	0	0	NA	0	NA	No	No	No	No
CG43139	NM_001260409	0	0	NA	0	NA	No	No	No	No
PH4alphaNE1	NM_170495	0	0	NA	0	NA	No	No	No	No
CG42269	NM_139762	0	0	NA	0	NA	No	No	No	No
CG42268	NM_168368	0.283767	0	0	3	108.804	No	No	No	No
Droj2	NM_169519	435.411	120.691	0.277187	3758	50.8279	Yes	Yes	Yes	No
CG42266	NM_001144355	0	0	NA	0	NA	No	No	No	No
CG42265	NM_001144688	0	0	NA	0	NA	No	No	No	No
CG42264	NM_132032	0	0	NA	0	NA	No	No	No	No
CG42263	NM_001144511	0	0	NA	0	NA	No	No	No	No
CG42261	NM_143196	0	0	NA	0	NA	No	No	No	No
CG42260	NM_137873	0	0	NA	0	NA	No	No	No	No
Plod	NM_140194	15.521	5.38838	0.347167	101	45.985	Yes	Yes	Yes	No
RhoGAP18B	NM_133124	12.2364	2.62849	0.21481	153	65.7193	Yes	Yes	Yes	No
CG5348	NM_001259446	0	0	NA	0	NA	No	No	No	No
Trs23	NM_135403	33.0382	20.5607	0.622329	122	46.0254	Yes	Yes	Yes	No
whip	NM_001103760	0	0	NA	0	NA	No	No	No	No
rt	NM_079301	23.1559	0	0	207	19.0707	Yes	No	Yes	No
ru	NM_080051	0	0	NA	1	243.337	No	No	No	No
dsx	NM_001300291	0.403252	0	0	2	119.164	No	No	No	No
CSN5	NM_058094	70.0601	156.867	2.23903	310	78.3506	Yes	Yes	Yes	No
CG5506	NM_140764	0	1.15637	NA	1	11.5795	No	No	No	No
ry	NM_079613	0	0	NA	0	NA	No	No	No	No
CG5500	NM_143254	39.4583	2.51141	0.0636473	207	58.603	Yes	No	Yes	No
smo	NM_078719	28.2051	0.931217	0.0330159	326	46.7276	Yes	No	Yes	No
CG31388	NM_001260113	8.64162	0.825023	0.0954709	63	52.625	No	No	No	No
CSN7	NM_136535	67.6551	147.05	2.17353	336	71.0964	Yes	Yes	Yes	No
rb	NM_080332	47.145	10.4619	0.221909	234	55.9147	Yes	Yes	Yes	No
smg	NM_001144452	523.973	1.91189	0.00364883	5713	43.6488	Yes	No	Yes	No
rn	NM_001275414	0	0	NA	0	NA	No	No	No	No
Spred	NM_001274050	34.6022	0	0	314	53.9618	Yes	No	Yes	No
dsb	NM_001104007	0.13838	0	0	8	59.1824	No	No	No	No
rk	NM_057354	2.49855	1.97899	0.792055	25	76.5452	Yes	No	No	No
CG42402	NM_001276243	0	0	NA	0	NA	No	No	No	No
Su(z)12	NM_143802	58.0022	6.79219	0.117102	359	52.6247	Yes	Yes	Yes	No
CG42404	NM_001043248	0	0	NA	0	NA	No	No	No	No
CG5342	NM_141831	0	0	NA	0	NA	No	No	No	No
Egm	NM_136843	18.8933	7.01181	0.371126	72	35.8276	Yes	Yes	No	No
Mst57Dc	NM_079774	0	0	NA	1	23.3607	No	No	No	No
Mst57Db	NM_079775	0	0	NA	0	NA	No	No	No	No
Mst57Da	NM_080167	0	0	NA	0	NA	No	No	No	No
wfs1	NM_142822	19.4628	5.67368	0.291514	94	46.6031	Yes	Yes	No	No
CG6974	NM_142157	0	0	NA	0	NA	No	No	No	No
CG6972	NM_001316516	0	0	NA	0	NA	No	No	No	No
FMRFa	NM_078945	0	0	NA	0	NA	No	No	No	No
CG6971	NM_141871	0	0	NA	0	NA	No	No	No	No
ato	NM_169213	0	0	NA	0	NA	No	No	No	No
Vinc	NM_001297885	45.3572	97.4944	2.14948	242	60.4216	Yes	Yes	Yes	No
atk	NM_140971	0	0	NA	0	NA	No	No	No	No
CG6978	NM_131960	0	0	NA	0	NA	No	No	No	No
CG14174	NM_140094	9.26141	3.44119	0.371563	44	40.4308	No	No	No	No
rnh1	NM_057967	33.1916	6.58719	0.198459	93	71.5276	Yes	No	No	No
Xbp1	NM_079983	76.5777	23.482	0.306643	405	39.9076	Yes	Yes	Yes	No
CG18659	NM_001259289	35.8343	7.39126	0.206262	291	44.9317	Yes	Yes	Yes	No
mus101	NM_080170	28.0408	17.9333	0.639545	138	40.4534	Yes	Yes	Yes	No
CG15225	NM_137672	0	0	NA	0	NA	No	No	No	No
CG18304	NM_001273241	0.13197	0	0	2	71.737	No	No	No	No
CG18870	NM_001299755	49.8652	8.92627	0.179008	532	63.5064	Yes	No	Yes	No
CG15553	NM_143584	0	0	NA	0	NA	No	No	No	No
CG16753	NM_139507	47.5508	7.06724	0.148625	266	45.6494	Yes	No	Yes	No
alpha-PheRS	NM_132220	69.2944	84.312	1.21672	218	86.7878	Yes	Yes	Yes	No
wash	NM_001299405	49.0749	13.3677	0.272393	240	54.7713	Yes	Yes	Yes	No
Galphao	NM_206079	42.7751	1.685	0.039392	221	44.0279	Yes	No	Yes	No
ArfGAP3	NM_141152	50.6427	24.4477	0.482748	279	64.346	Yes	Yes	Yes	No
ArfGAP1	NM_079316	61.8808	39.0703	0.631381	502	60.0212	Yes	Yes	Yes	No
Sfp84E	NM_001170073	0	0	NA	0	NA	No	No	No	No
CG11426	NM_141137	0.127855	0	0	0	NA	No	No	No	No
CG33342	NM_001104434	0	0	NA	0	NA	No	No	No	No
Rala	NM_080324	196.002	149.7	0.763768	1542	46.9744	Yes	Yes	Yes	No
Mal-B2	NM_001201862	15.6544	23.9126	1.52754	12	97.3583	Yes	Yes	No	No
DCTN6-p27	NM_136105	36.9781	58.3558	1.57812	130	72.3171	Yes	Yes	Yes	No
CG13689	NM_001272910	19.3985	7.73005	0.398487	152	45.8701	No	No	Yes	No
Cen	NM_136205	110.051	9.32564	0.0847392	444	54.9097	Yes	Yes	Yes	No
REPTOR-BP	NM_164904	23.8219	31.5369	1.32386	109	45.8033	No	No	Yes	No
Prp31	NM_140499	38.2779	39.5461	1.03313	168	83.2157	Yes	Yes	Yes	No
CG31960	NM_164559	0	0	NA	0	NA	No	No	No	No
CG31961	NM_164571	38.3719	40.3208	1.05079	143	55.1483	Yes	Yes	Yes	No
Ilp3	NM_140103	0	0	NA	0	NA	No	No	No	No
Sucb	NM_143706	28.6925	0	0	196	26.7519	Yes	No	Yes	No
xit	NM_132127	11.8041	10.742	0.910021	50	88.8071	Yes	Yes	No	No
CG4908	NM_164892	18.6705	6.40552	0.343083	49	43.222	Yes	No	No	No
CG3597	NM_001273001	0.129049	0	0	7	34.9087	No	No	No	No
CG3224	NM_132107	51.2915	14.2847	0.278501	251	38.9654	Yes	No	Yes	No
CG4907	NM_142829	0	0	NA	0	NA	No	No	No	No
CG3226	NM_132104	274.538	350.211	1.27564	1038	48.7566	Yes	Yes	Yes	No
CG4901	NM_135512	44.0149	13.727	0.311872	187	59.8397	Yes	Yes	Yes	No
CG3223	NM_141501	32.1912	41.8765	1.30087	196	43.2813	Yes	Yes	Yes	No
CG32376	NM_168223	0	0	NA	0	NA	No	No	No	No
Ilp6	NM_130644	1.36208	2.08062	1.52754	1	47.0924	No	No	No	No
CG42470	NM_001169482	0	0	NA	0	NA	No	No	No	No
Cyp4d21	NM_135285	0	0	NA	0	NA	No	No	No	No
CG33521	NM_001014702	0.0654754	0	0	0	NA	No	No	No	No
Ilp4	NM_140104	0	0	NA	0	NA	No	No	No	No
knk	NM_141724	0.123172	0	0	1	50.8371	No	No	No	No
CG14795	NM_130569	0.4133	1.89399	4.58261	5	60.8638	No	No	No	No
CG14797	NM_001258539	0	0	NA	0	NA	No	No	No	No
trem	NM_142604	29.0927	1.79556	0.0617186	129	37.9261	Yes	No	Yes	No
CG14798	NM_130582	0.287305	0	0	7	31.2651	No	No	No	No
CG43815	NM_001273070	0	0	NA	0	NA	No	No	No	No
CG10086	NM_141479	0	0	NA	0	NA	No	No	No	No
CG10081	NM_137574	0	0	NA	0	NA	No	No	No	No
CG10082	NM_166466	15.4861	8.36162	0.539944	49	57.471	Yes	Yes	No	No
Usp16-45	NM_001297961	67.5983	16.4301	0.243055	343	58.9336	Yes	Yes	Yes	No
CG3040	NM_132144	31.334	17.0942	0.545548	299	52.4396	Yes	Yes	Yes	No
CG3045	NM_137802	22.5642	4.71799	0.209092	154	38.0952	Yes	No	Yes	No
CG10089	NM_001274874	0.384554	0.440565	1.14565	1	65.3402	No	No	No	No
Mo25	NM_079393	50.7873	26.4475	0.520751	240	39.8919	Yes	Yes	Yes	No
RpII18	NM_080171	81.6172	74.1448	0.908446	306	67.5725	Yes	Yes	Yes	No
RpII15	NM_001300397	80.8621	28.5045	0.352508	438	49.4611	Yes	No	Yes	No
CG12025	NM_001299978	52.3945	7.38779	0.141003	340	47.5695	Yes	No	Yes	No
CG12795	NM_001103604	127.374	32.8283	0.257732	812	30.8794	Yes	Yes	Yes	No
cv-2	NM_080070	0.507538	0	0	13	72.8634	No	No	No	No
Asx	NM_001274041	22.7723	0.624142	0.0274079	220	44.0283	Yes	No	Yes	No
ph-d	NM_001103395	4.81561	5.51701	1.14565	69	55.5412	Yes	Yes	No	No
Cpr47Ef	NM_136816	0	0	NA	0	NA	No	No	No	No
Cpr47Eg	NM_136817	0	0	NA	0	NA	No	No	No	No
Cpr47Ed	NM_136814	0	0	NA	0	NA	No	No	No	No
Cpr47Ee	NM_136815	0.352085	0	0	0	NA	No	No	No	No
Cpr47Eb	NM_136811	0	0	NA	0	NA	No	No	No	No
Cpr47Ec	NM_136813	0	0	NA	0	NA	No	No	No	No
CG10338	NM_001299127	21.0783	2.36749	0.112319	194	52.3744	Yes	No	Yes	No
CG10339	NM_138037	0	0	NA	0	NA	No	No	No	No
CG10336	NM_136051	80.5632	16.307	0.202412	488	40.1932	Yes	Yes	Yes	No
CG10337	NM_136142	1.85676	3.40353	1.83304	15	56.5607	No	No	No	No
ph-p	NM_001297874	0.498735	0.999909	2.00489	2	66.9328	No	No	No	No
CG10333	NM_136044	21.651	8.4842	0.391862	45	53.0666	Yes	Yes	No	No
CkIIbeta	NM_080762	198.463	210.686	1.06159	340	63.7686	Yes	Yes	Yes	No
CG12605	NM_001274458	0	0	NA	1	75.1889	No	No	No	No
Sgs8	NM_057371	0	0	NA	0	NA	No	No	No	No
Sgs7	NM_057370	0	0	NA	0	NA	No	No	No	No
Sgs5	NM_079664	0	0	NA	0	NA	No	No	No	No
Sgs4	NM_057369	0	0	NA	0	NA	No	No	No	No
Sgs3	NM_079300	0	0	NA	0	NA	No	No	No	No
Sgs1	NM_078751	0	0	NA	0	NA	No	No	No	No
hui	NM_166071	0	0	NA	0	NA	No	No	No	No
CG12241	NM_142175	23.776	1.44632	0.060831	159	46.8744	Yes	No	Yes	No
CG1503	NM_001298582	12.3834	5.8705	0.474063	76	41.442	Yes	No	No	No
CG8814	NM_134885	48.1474	3.69789	0.0768034	208	34.2501	Yes	No	Yes	No
CG8813	NM_134883	0.463615	0	0	0	NA	No	No	No	No
CG1504	NM_001272814	0	0	NA	0	NA	No	No	No	No
Keap1	NM_142337	3.70078	0.260911	0.0705016	12	50.3361	No	No	No	No
Pkcdelta	NM_132569	0.0220769	0	0	0	NA	No	No	No	No
Eip93F	NM_001275888	1.62711	0.972575	0.597731	9	21.5297	No	No	No	No
RpL18A	NM_079050	2421.24	255.599	0.105565	8511	59.1006	Yes	Yes	Yes	No
CG8818	NM_136950	35.5151	4.13776	0.116507	256	82.2541	Yes	No	Yes	No
CG2316	NM_166736	81.968	2.1282	0.0259638	834	33.1564	Yes	No	Yes	No
CG7766	NM_001258659	32.8385	1.2741	0.0387991	187	35.1312	Yes	No	Yes	No
Ctr1A	NM_132108	43.5219	63.5396	1.45994	242	55.1957	Yes	Yes	Yes	No
CG2310	NM_170411	34.8893	9.68993	0.277734	309	26.5168	Yes	No	Yes	No
cv-c	NM_001104316	0.443917	0	0	3	80.1387	No	No	No	No
Tgi	NM_168555	31.7795	9.1478	0.287852	449	29.4518	Yes	Yes	Yes	No
ste24b	NM_137330	0.288416	0	0	1	124.433	No	No	No	No
ste24a	NM_137331	62.7732	119.606	1.90536	354	54.418	Yes	Yes	Yes	No
CG6415	NM_135597	0	0	NA	0	NA	No	No	No	No
CG6414	NM_001316636	0	0	NA	0	NA	No	No	No	No
CG7839	NM_140174	45.895	1.14838	0.025022	247	50.6407	Yes	No	Yes	No
CG6412	NM_136003	72.6943	16.9707	0.233453	657	52.4028	Yes	Yes	Yes	No
CG7834	NM_170428	135.935	309.066	2.27363	1082	121.209	Yes	Yes	Yes	No
CG7837	NM_143469	27.7508	7.52726	0.271245	157	47.8918	Yes	Yes	Yes	No
CG6418	NM_140156	35.1923	5.147	0.146253	274	36.1148	Yes	Yes	Yes	No
CG10671	NM_168110	29.8282	14.7331	0.493933	375	47.0052	Yes	Yes	Yes	No
CHOp24	NM_001297933	78.6953	178.833	2.27247	368	65.0167	Yes	Yes	Yes	No
CG5697	NM_142675	0	0	NA	0	NA	No	No	No	No
CG5694	NM_164894	92.1758	21.9025	0.237617	352	51.8647	Yes	Yes	Yes	No
Hr38	NM_057771	0.0780692	0	0	0	NA	No	No	No	No
CG5693	NM_144325	0	0	NA	0	NA	No	No	No	No
HIPP1	NM_141004	80.8553	1.87873	0.0232357	395	50.2143	Yes	No	Yes	No
Rcd5	NM_139595	72.8574	25.007	0.343232	432	44.9313	Yes	Yes	Yes	No
Rcd4	NM_135377	40.0352	43.5342	1.0874	320	54.8548	Yes	Yes	Yes	No
Rcd7	NM_168803	0	0	NA	0	NA	No	No	No	No
Rcd6	NM_001169746	0.750422	0	0	16	71.5705	No	No	No	No
Rcd1	NM_001274034	62.7965	9.71165	0.154653	543	47.1466	Yes	Yes	Yes	No
CG32809	NM_001272208	4.19299	0	0	69	53.645	Yes	No	No	No
Rcd2	NM_140987	0.475184	0	0	0	NA	No	No	No	No
Sp212	NM_206487	0.0828802	0	0	0	NA	No	No	No	No
CG32806	NM_166904	0	0	NA	0	NA	No	No	No	No
CG32801	NM_166913	0	0	NA	0	NA	No	No	No	No
CG32803	NM_001272221	45.9871	12.5941	0.273861	169	60.6819	Yes	No	Yes	No
CheB38a	NM_206014	0	0	NA	0	NA	No	No	No	No
CheB38b	NM_206013	0	0	NA	0	NA	No	No	No	No
CheB38c	NM_136217	0	0	NA	0	NA	No	No	No	No
Chmp1	NM_001300179	43.3862	97.3821	2.24454	184	79.8009	Yes	Yes	Yes	No
CG9186	NM_138253	34.8728	17.6115	0.505022	147	63.0489	Yes	Yes	Yes	No
CG18449	NM_136530	0	0	NA	0	NA	No	No	No	No
godzilla	NM_169139	47.5777	6.20855	0.130493	279	73.9711	Yes	No	Yes	No
Acox57D-p	NM_079078	37.7474	6.03423	0.159858	196	33.216	Yes	Yes	Yes	No
pxb	NM_001275680	0.26739	0.919007	3.43695	4	74.6857	No	No	No	No
TTLL3B	NM_135224	0	0	NA	0	NA	No	No	No	No
NetA	NM_001298314	0.116756	0.267523	2.2913	1	8.7862	No	No	No	No
CG13045	NM_140607	0	0	NA	0	NA	No	No	No	No
CG13044	NM_140610	0	0	NA	1	61.9089	No	No	No	No
CG13047	NM_140605	0	0	NA	1	37.0197	No	No	No	No
CG13046	NM_140606	0	0	NA	2	93.9913	No	No	No	No
CG13041	NM_140615	0	0	NA	0	NA	No	No	No	No
CG13043	NM_140611	0	0	NA	0	NA	No	No	No	No
CG13042	NM_140613	0	0	NA	0	NA	No	No	No	No
Rpt6R	NM_143554	0.32453	0	0	1	51.5185	No	No	No	No
CG13049	NM_168657	0	0	NA	0	NA	No	No	No	No
CG13048	NM_001275006	0	0	NA	1	15.528	No	No	No	No
fd102C	NM_143694	0.781963	0	0	2	54.9036	No	No	No	No
Neto	NM_001298282	0	0	NA	0	NA	No	No	No	No
CG30375	NM_165600	0	0	NA	0	NA	No	No	No	No
CG30376	NM_165599	0	0	NA	0	NA	No	No	No	No
CG30377	NM_001299242	45.3103	14.8776	0.328349	212	88.4586	Yes	Yes	Yes	No
Nmd3	NM_057984	35.5321	7.14494	0.201084	248	37.7615	Yes	Yes	Yes	No
CG30371	NM_136526	0	0	NA	0	NA	No	No	No	No
CG30373	NM_001299260	41.9533	38.7181	0.922886	238	51.0092	Yes	Yes	Yes	No
CG30379	NM_165574	0	0	NA	0	NA	No	No	No	No
Socs44A	NM_078935	32.6574	0	0	128	44.415	Yes	No	Yes	No
Rim	NM_001260239	0	0	NA	0	NA	No	No	No	No
Ric	NM_057863	45.4197	0	0	284	42.6607	Yes	No	Yes	No
Irk1	NM_001202341	19.6926	8.69815	0.441697	123	84.6086	Yes	Yes	Yes	No
Irk2	NM_001300556	0	0	NA	0	NA	No	No	No	No
Irk3	NM_001144363	0	0	NA	1	86.8434	No	No	No	No
Deaf1	NM_001275140	51.8039	1.01741	0.0196397	167	50.3275	Yes	No	Yes	No
CG8673	NM_135338	0	0	NA	0	NA	No	No	No	No
CG12576	NM_001272844	56.4509	6.45386	0.114327	599	50.4159	Yes	No	Yes	No
CG8671	NM_001299195	40.9275	2.22837	0.0544468	363	56.8123	Yes	No	Yes	No
CG13309	NM_140005	0	0	NA	0	NA	No	No	No	No
CG8677	NM_001299194	43.2169	4.16334	0.096336	205	42.0911	Yes	Yes	Yes	No
CG8675	NM_132981	38.1757	11.3148	0.296387	152	50.1285	Yes	No	Yes	No
CG13300	NM_139786	0	0	NA	0	NA	No	No	No	No
CG13306	NM_144187	0.529376	0	0	0	NA	No	No	No	No
CG13305	NM_001144441	0	0	NA	0	NA	No	No	No	No
CG34045	NM_001038872	0	0	NA	0	NA	No	No	No	No
CG40635	NM_001110696	0	0	NA	0	NA	No	No	No	No
Ate1	NM_001274172	48.0649	5.26362	0.109511	438	51.8053	Yes	No	Yes	No
CG43677	NM_001274180	0	0	NA	0	NA	No	No	No	No
Aats-thr	NM_001298939	83.408	206.054	2.47043	499	73.9737	Yes	Yes	Yes	No
CG43851	NM_001273019	0	0	NA	0	NA	No	No	No	No
wts	NM_170524	39.6659	20.2358	0.510156	310	70.202	Yes	Yes	Yes	No
CG31777	NM_164550	1.33289	0	0	4	38.5205	No	No	No	No
CG31776	NM_164538	0	0	NA	0	NA	No	No	No	No
CG5991	NM_142951	63.0669	61.6791	0.977995	804	65.427	Yes	Yes	Yes	No
CG31778	NM_164549	0	0	NA	0	NA	No	No	No	No
CG43679	NM_001274926	0	0	NA	0	NA	No	No	No	No
CG43678	NM_001274925	0	0	NA	0	NA	No	No	No	No
CG4022	NM_001259768	29.3708	0	0	342	31.0434	Yes	No	Yes	No
CG4020	NM_001272335	3.20761	3.17821	0.990834	6	101.808	No	No	No	No
CG4021	NM_137766	0	0	NA	0	NA	No	No	No	No
CG4025	NM_130623	10.622	4.12512	0.388356	87	51.6219	No	No	No	No
CG42671	NM_001300099	22.2598	2.02768	0.0910915	217	45.0179	Yes	No	Yes	No
CG42672	NM_137730	13.9644	16.4956	1.18126	114	60.1332	Yes	Yes	Yes	No
CG42673	NM_168353	0.513484	0.427836	0.833201	29	61.4346	No	No	No	No
CG42674	NM_140925	9.77886	0.808476	0.0826759	7	70.7078	Yes	No	No	No
CG42675	NM_001202252	1.016	0	0	9	39.8791	No	No	No	No
CG42676	NM_001299976	13.9122	5.08185	0.36528	106	51.3678	Yes	No	Yes	No
Nop56	NM_142783	146.677	52.6177	0.358732	767	36.0613	Yes	Yes	Yes	No
Cdk12	NM_141068	72.5201	0.665994	0.00918358	356	41.6118	Yes	No	Yes	No
pita	NM_166607	61.0409	4.06761	0.0666374	513	40.4337	Yes	No	Yes	No
Prestin	NM_140767	42.3622	9.15704	0.216161	295	38.5646	Yes	Yes	Yes	No
Vha14-1	NM_057621	151.198	508.697	3.36444	696	70.4169	Yes	Yes	Yes	No
Vha14-2	NM_001260015	0	0	NA	0	NA	No	No	No	No
Prp18	NM_142519	25.4432	6.44502	0.25331	118	37.5347	Yes	No	Yes	No
Prp19	NM_079059	76.608	46.6014	0.60831	427	55.6776	Yes	Yes	Yes	No
LManIII	NM_001298833	0	0	NA	0	NA	No	No	No	No
CG3698	NM_141000	0	0	NA	0	NA	No	No	No	No
CG3699	NM_130519	0.176209	0	0	0	NA	No	No	No	No
CG14540	NM_143194	0	0	NA	0	NA	No	No	No	No
CG14543	NM_143201	50.64	15.8947	0.313877	275	41.1302	Yes	No	Yes	No
CG3690	NM_001297835	0	0	NA	0	NA	No	No	No	No
CG14096	NM_140856	0	0	NA	0	NA	No	No	No	No
CG14095	NM_140855	0	0	NA	0	NA	No	No	No	No
CG14546	NM_143191	0	0	NA	0	NA	No	No	No	No
CG10659	NM_136174	0	0	NA	0	NA	No	No	No	No
CG18467	NM_137367	0	0	NA	0	NA	No	No	No	No
CG10651	NM_001299166	0	0	NA	0	NA	No	No	No	No
CG10650	NM_001299152	0.91175	4.64243	5.09178	6	47.0796	No	No	No	No
CG10654	NM_001274838	0.732399	0	0	2	61.2271	No	No	No	No
CG10657	NM_140322	0	0	NA	0	NA	No	No	No	No
CG18469	NM_137357	0	0	NA	0	NA	No	No	No	No
Pk34A	NM_135759	0	0	NA	0	NA	No	No	No	No
fru	NM_001275783	1.57957	1.97415	1.2498	7	78.8654	No	No	No	No
fry	NM_001259770	7.72215	13.1825	1.70711	70	63.0775	Yes	Yes	No	No
CG12877	NM_001038984	40.9434	0	0	162	52.214	Yes	No	Yes	No
Calr	NM_001275501	380.965	246.342	0.646625	2892	47.3638	Yes	Yes	Yes	No
Lrt	NM_001299711	0	0	NA	0	NA	No	No	No	No
CG14893	NM_142311	0	0	NA	0	NA	No	No	No	No
CG14892	NM_142305	0	0	NA	0	NA	No	No	No	No
CG14327	NM_001300448	0	0	NA	0	NA	No	No	No	No
CG14326	NM_142382	0	0	NA	0	NA	No	No	No	No
CG14321	NM_142393	0	0	NA	0	NA	No	No	No	No
CG14323	NM_169767	0	0	NA	0	NA	No	No	No	No
CG14322	NM_001300450	19.282	0	0	224	52.2904	Yes	No	Yes	No
lectin-22C	NM_001144294	0	0	NA	0	NA	No	No	No	No
CG14329	NM_142379	0	0	NA	0	NA	No	No	No	No
Sulf1	NM_001275697	15.2531	1.55715	0.102088	146	56.7385	Yes	No	Yes	No
CG5205	NM_142215	14.4072	0.438397	0.030429	111	47.8175	Yes	No	Yes	No
stwl	NM_001274910	27.7715	0.372122	0.0133994	157	45.7758	Yes	No	Yes	No
heph	NM_001170322	70.1969	70.9252	1.01038	231	72.9607	Yes	Yes	Yes	No
spin	NM_080084	40.3652	36.5007	0.90426	344	42.6557	Yes	Yes	Yes	No
CG7220	NM_001299364	66.3643	26.161	0.394203	684	54.1251	Yes	Yes	Yes	No
CG7222	NM_136769	60.4495	22.081	0.36528	341	59.587	Yes	Yes	Yes	No
CG7227	NM_001298804	0.0825503	0.756591	9.16521	0	NA	No	No	No	No
CG34245	NM_001202178	0	0	NA	0	NA	No	No	No	No
Cyp317a1	NM_001299507	1.56846	0	0	4	46.6536	No	No	No	No
CG14877	NM_142250	0	0	NA	0	NA	No	No	No	No
Tsp96F	NM_001276048	42.0703	0	0	299	48.3924	Yes	No	Yes	No
Ku80	NM_135923	17.2344	13.0704	0.758389	83	45.9107	Yes	Yes	No	No
CG4440	NM_001273568	0	0	NA	0	NA	No	No	No	No
Ppn	NM_176575	0	0.329647	NA	0	NA	No	No	No	No
CG13228	NM_136801	0	0	NA	0	NA	No	No	No	No
Ahcy89E	NM_206499	0.849169	0	0	9	49.3301	No	No	No	No
RpL35	NM_167043	2120.65	325.766	0.153616	12178	61.8702	Yes	Yes	Yes	No
mms4	NM_136767	33.5041	38.222	1.14082	117	63.4154	Yes	Yes	Yes	No
CG32024	NM_168296	0	0	NA	0	NA	No	No	No	No
CG32022	NM_001300058	30.3983	85.4551	2.81118	131	58.7124	Yes	Yes	Yes	No
CG32023	NM_168295	0	0	NA	0	NA	No	No	No	No
CG7593	NM_143458	57.1943	85.6666	1.49782	447	46.1658	Yes	Yes	Yes	No
CG2070	NM_001273857	0	0	NA	0	NA	No	No	No	No
Khc-73	NM_001274070	23.579	5.2219	0.221464	242	29.9877	Yes	Yes	Yes	No
Cad87A	NM_169440	21.8838	84.6699	3.86907	193	30.6235	Yes	Yes	Yes	No
Or13a	NM_078635	0	0	NA	0	NA	No	No	No	No
HBS1	NM_001299977	30.4195	12.488	0.410525	166	50.009	Yes	Yes	Yes	No
CG15056	NM_133063	0	0	NA	0	NA	No	No	No	No
topi	NM_141688	0.207772	0	0	1	97.8117	No	No	No	No
CG15059	NM_167611	0	0	NA	0	NA	No	No	No	No
CG11210	NM_136507	27.6328	18.6371	0.674456	276	26.3579	Yes	Yes	Yes	No
CG11211	NM_136364	0	0	NA	0	NA	No	No	No	No
GABA-B-R2	NM_001300527	0.137273	0	0	1	44.5374	No	No	No	No
GABA-B-R3	NM_164387	0.192973	0	0	1	50.7238	No	No	No	No
CG5783	NM_136025	0	0	NA	0	NA	No	No	No	No
cindr	NM_001276200	44.6346	20.1257	0.450899	289	61.188	Yes	Yes	Yes	No
CG9331	NM_001299178	36.071	60.0096	1.66365	88	73.0724	Yes	Yes	No	No
CG9330	NM_140872	57.1404	30.7415	0.538	261	60.7508	Yes	Yes	Yes	No
CG12499	NM_142787	18.7924	23.715	1.26195	140	86.3761	Yes	Yes	Yes	No
l(2)03659	NM_136638	5.373	2.37829	0.442638	30	53.1709	Yes	No	No	No
CG6178	NM_142964	71.4239	147.468	2.06469	268	87.7129	Yes	Yes	Yes	No
CG9336	NM_136225	18.8015	17.232	0.916521	146	73.0026	No	No	Yes	No
CG9338	NM_001273717	0.631489	1.44693	2.2913	5	53.2577	No	No	No	No
CG6175	NM_001274779	41.2179	5.15142	0.12498	298	42.528	Yes	No	Yes	No
CG12490	NM_137878	0	0	NA	0	NA	No	No	No	No
CG12493	NM_139670	0.887538	0	0	3	58.3784	No	No	No	No
CG6171	NM_142198	45.0175	7.76388	0.172464	9	44.0147	Yes	No	No	No
Daxx	NM_135191	52.3856	0.925097	0.0176594	572	64.6548	Yes	No	Yes	No
CG16798	NM_136186	0.0760411	0	0	0	NA	No	No	No	No
CG16799	NM_001299712	0.507768	3.49035	6.87391	1	83.5559	No	No	No	No
CG8319	NM_141663	45.1554	3.10394	0.0687391	155	51.7328	Yes	No	Yes	No
CG16978	NM_144312	1.03239	0	0	9	94.5234	No	No	No	No
CG16979	NM_140522	26.1569	24.7446	0.946007	130	54.4349	Yes	Yes	Yes	No
CG8314	NM_137226	35.1379	1.37041	0.0390009	151	49.2171	Yes	No	Yes	No
CG16790	NM_141654	16.4274	9.41003	0.572826	122	40.5782	Yes	No	Yes	No
CG16791	NM_142710	1.02499	1.91364	1.86699	15	73.4545	No	No	No	No
CG16972	NM_135768	22.2227	1.00941	0.0454223	144	56.9342	Yes	No	Yes	No
CG8311	NM_137295	38.291	0.389939	0.0101836	238	43.0606	Yes	No	Yes	No
CG8312	NM_141661	34.1365	14.3026	0.418981	313	60.0807	Yes	Yes	Yes	No
Vps39	NM_142445	22.6538	11.4858	0.507012	146	58.0852	Yes	Yes	Yes	No
ImpL3	NM_001274545	0.524355	1.20146	2.2913	0	NA	No	No	No	No
Cnot4	NM_001273414	91.6676	37.4128	0.408135	477	61.2704	Yes	Yes	Yes	No
Sox100B	NM_143582	0.0807813	0	0	0	NA	No	No	No	No
CG31100	NM_169249	0.592114	1.08537	1.83304	3	78.6557	No	No	No	No
ham	NM_001273614	0	0	NA	0	NA	No	No	No	No
Drs	NM_079177	0	3.49749	NA	0	NA	No	No	No	No
Uvrag	NM_135788	16.2133	1.3966	0.0861392	103	52.7139	Yes	No	Yes	No
Ent3	NM_001300123	0.127137	0	0	0	NA	No	No	No	No
haf	NM_001272946	0	0	NA	0	NA	No	No	No	No
bnk	NM_079865	0	0	NA	0	NA	No	No	No	No
E(spl)mgamma-HLH	NM_079780	0	0	NA	0	NA	No	No	No	No
CG31103	NM_001104444	0	0	NA	0	NA	No	No	No	No
bnl	NM_001144611	0.668535	0	0	3	40.6601	No	No	No	No
bnb	NM_167634	11.7692	316.47	26.8897	341	32.1755	Yes	Yes	Yes	No
CG6310	NM_140172	1.87073	2.1432	1.14565	2	70.9919	No	No	No	No
east	NM_001258556	72.674	7.02505	0.0966652	681	50.6967	Yes	Yes	Yes	No
Spase22-23	NM_001260350	103.077	332.747	3.22814	457	96.8585	Yes	Yes	Yes	No
CG1339	NM_136463	0	0	NA	0	NA	No	No	No	No
Lgr4	NM_001103496	0	0	NA	0	NA	No	No	No	No
Lgr1	NM_169777	0.0508599	0	0	0	NA	No	No	No	No
Lgr3	NM_170236	0	0	NA	0	NA	No	No	No	No
MESK2	NM_206192	43.6472	24.2936	0.556592	2	33.6719	Yes	Yes	No	No
calypso	NM_137252	22.1303	1.25203	0.0565754	125	48.4107	Yes	No	Yes	No
CG3909	NM_141712	46.0266	28.9264	0.628472	282	42.1138	Yes	Yes	Yes	No
Nup98-96	NM_142930	55.2382	71.9333	1.30224	178	56.1453	Yes	Yes	Yes	No
CG17778	NM_001297812	0	0	NA	0	NA	No	No	No	No
CG17777	NM_001297879	0	0	NA	1	-7.60674	No	No	No	No
CG17776	NM_001297878	120.587	101.427	0.841111	578	83.7956	Yes	Yes	Yes	No
St4	NM_001299469	0.878731	2.87634	3.27329	6	59.2925	No	No	No	No
CG32006	NM_166734	0	0	NA	0	NA	No	No	No	No
GstD7	NM_080375	0	0	NA	0	NA	No	No	No	No
GstD6	NM_080176	0.208032	0	0	0	NA	No	No	No	No
GstD5	NM_080175	0	0	NA	0	NA	No	No	No	No
GstD4	NM_080174	0.624097	0	0	0	NA	No	No	No	No
Cpsf100	NM_143401	27.166	22.3313	0.822034	112	65.299	Yes	Yes	Yes	No
GstD2	NM_080173	2.08032	1.90666	0.916521	4	72.8346	No	No	No	No
GstD1	NM_001038953	1214.86	2810.16	2.31315	2975	78.1388	Yes	Yes	Yes	No
CG32000	NM_001103379	40.9381	5.16339	0.126127	226	59.9022	Yes	Yes	Yes	No
Atac2	NM_136045	10.335	0	0	83	32.187	Yes	No	No	No
Atac3	NM_167828	23.5338	3.05224	0.129696	180	41.0317	Yes	No	Yes	No
Acp98AB	NM_001276097	0	0	NA	0	NA	No	No	No	No
GstD9	NM_001300374	18.4453	31.9326	1.73121	103	66.3574	Yes	Yes	Yes	No
GstD8	NM_080177	0	0	NA	2	56.3861	No	No	No	No
Gs1	NM_164367	189.742	127.403	0.671454	1254	46.0114	Yes	Yes	Yes	No
RASSF8	NM_143154	53.1554	7.39126	0.13905	65	68.9185	Yes	Yes	No	No
Gs2	NM_001298194	1.17362	6.45386	5.49913	9	61.6343	No	No	No	No
NHP2	NM_001274920	106.016	209.341	1.97462	534	35.8789	Yes	Yes	Yes	No
MP1	NM_001316492	4.31581	16.3166	3.78065	77	66.012	No	Yes	No	No
CG42685	NM_135873	0	0	NA	0	NA	No	No	No	No
CG17514	NM_001015316	70.4259	15.5552	0.220873	637	61.4444	Yes	Yes	Yes	No
ade5	NM_001272564	36.5064	13.826	0.378728	421	31.1377	Yes	Yes	Yes	No
for	NM_058139	51.5479	16.3035	0.316279	493	67.8171	Yes	Yes	Yes	No
ade3	NM_001298769	31.5039	13.3571	0.423981	123	38.8761	Yes	Yes	Yes	No
CG9806	NM_132415	0	0	NA	0	NA	No	No	No	No
CG9804	NM_141215	19.9425	0	0	179	21.4933	Yes	No	Yes	No
Ugt86Dc	NM_144368	0	0	NA	0	NA	No	No	No	No
CG9801	NM_141570	9.39005	0	0	55	54.5638	Yes	No	No	No
soti	NM_142101	0	0	NA	0	NA	No	No	No	No
CG32457	NM_168982	0	0	NA	0	NA	No	No	No	No
fog	NM_001272855	34.192	85.926	2.51304	169	84.0616	Yes	Yes	Yes	No
Ef1gamma	NM_001202379	905.468	281.385	0.310762	5591	79.8835	Yes	Yes	Yes	No
CG42688	NM_001273635	0	0	NA	0	NA	No	No	No	No
fon	NM_136115	0	0.338534	NA	6	29.9279	No	No	No	No
CG5913	NM_143182	64.614	13.0059	0.201286	308	45.6192	Yes	Yes	Yes	No
foi	NM_001300056	71.8427	5.23019	0.0728006	497	40.8372	Yes	Yes	Yes	No
fok	NM_001201926	193.923	57.0091	0.293978	1136	45.1201	Yes	Yes	Yes	No
Mitofilin	NM_079720	51.7105	37.3055	0.72143	238	78.4966	Yes	Yes	Yes	No
CG9759	NM_001300386	0	0	NA	0	NA	No	No	No	No
CG32452	NM_001300219	37.5809	1.70176	0.0452827	152	56.7112	Yes	No	Yes	No
CG6495	NM_135607	0.566041	0.576432	1.01836	2	62.5993	No	No	No	No
Gsc	NM_001144290	0	0	NA	0	NA	No	No	No	No
CG18628	NM_140144	0	0	NA	1	120.444	No	No	No	No
CG9990	NM_170376	0.163402	0.499204	3.05507	6	117.004	No	No	No	No
CG32450	NM_168953	0	0	NA	0	NA	No	No	No	No
Ugt86Dj	NM_144362	0	0	NA	0	NA	No	No	No	No
CG7025	NM_135289	0	0	NA	0	NA	No	No	No	No
RpL23A	NM_079162	1602.96	56.7182	0.0353834	17237	46.6688	Yes	Yes	Yes	No
Wnt2	NM_057462	0	0	NA	0	NA	No	No	No	No
Wnt6	NM_135264	0	0	NA	0	NA	No	No	No	No
Wnt5	NM_001298478	10.6991	9.22913	0.862608	46	67.675	Yes	Yes	No	No
Wnt4	NM_057624	0	0	NA	0	NA	No	No	No	No
ldbr	NM_206300	16.9604	1.83309	0.10808	86	35.8487	Yes	No	No	No
CG34248	NM_001104149	0	0	NA	0	NA	No	No	No	No
CG43449	NM_001260110	0	0	NA	3	121.101	No	No	No	No
CG43112	NM_001259333	0	0	NA	0	NA	No	No	No	No
CG43445	NM_001260245	0	0	NA	0	NA	No	No	No	No
CG43110	NM_001299603	0	0	NA	1	76.1764	No	No	No	No
CG34247	NM_001104147	0	0	NA	0	NA	No	No	No	No
CG43116	NM_001260379	0	0	NA	1	57.3379	No	No	No	No
CG34241	NM_001104121	0	0	NA	0	NA	No	No	No	No
CG34242	NM_001104125	25.4684	13.4667	0.528762	90	46.6382	No	No	No	No
CG43115	NM_001258613	0	0	NA	0	NA	No	No	No	No
CG42249	NM_001272509	0	0	NA	0	NA	No	No	No	No
mbm	NM_134667	56.7342	5.44673	0.0960043	328	55.0609	Yes	No	Yes	No
mbo	NM_079606	35.2848	42.3623	1.20058	208	81.3222	Yes	Yes	Yes	No
Sod2	NM_001299574	188.253	452.109	2.40161	614	103.409	Yes	Yes	Yes	No
Sod3	NM_001316415	592.42	3507.9	5.9213	4137	79.5863	Yes	Yes	Yes	No
sog	NM_001272649	0.932923	1.30115	1.39471	5	35.7424	No	No	No	No
CG42792	NM_001299037	0	0	NA	1	19.3267	No	No	No	No
CG42790	NM_001276064	0	0	NA	0	NA	No	No	No	No
CG42797	NM_001201643	28.8762	1.48532	0.0514374	169	55.1316	Yes	No	Yes	No
sol	NM_057390	41.7743	6.14037	0.146989	161	83.4996	Yes	Yes	Yes	No
CG42795	NM_141731	0	0.0622574	NA	0	NA	No	No	No	No
mbc	NM_001260338	23.4986	2.003	0.0852389	279	44.6381	Yes	Yes	Yes	No
CG44838	NM_001300078	49.8736	4.67863	0.0938097	0	NA	Yes	Yes	No	No
Mp20	NM_057295	0	1.12889	NA	0	NA	No	No	No	No
unc-13-4A	NM_001274575	0	0	NA	0	NA	No	No	No	No
mbt	NM_078651	74.4424	1.21945	0.0163811	378	42.5844	Yes	No	Yes	No
Pms2	NM_057675	37.9782	15.059	0.396517	387	50.1062	Yes	Yes	Yes	No
CG44836	NM_168665	0	0	NA	0	NA	No	No	No	No
snRNP-U1-C	NM_142510	37.5134	1.46931	0.0391676	417	28.9498	Yes	No	Yes	No
tamo	NM_166664	28.8187	0.729639	0.0253183	283	50.7483	Yes	No	Yes	No
CG5521	NM_001170277	17.4952	10.2412	0.585369	73	65.1514	Yes	Yes	No	No
CG5522	NM_166195	32.5056	3.87629	0.11925	164	62.6331	Yes	No	Yes	No
CG5525	NM_135735	193.819	317.37	1.63746	455	84.761	Yes	Yes	Yes	No
Hand	NM_135526	0	0	NA	0	NA	No	No	No	No
Tpr2	NM_001273572	120.445	104.6	0.868452	537	56.7747	Yes	Yes	Yes	No
alphaSnap	NM_079456	89.5883	101.777	1.13606	503	60.2151	Yes	Yes	Yes	No
HisCl1	NM_169429	0	0	NA	0	NA	No	No	No	No
az2	NM_136445	23.1999	0.987455	0.0425629	147	53.932	Yes	No	Yes	No
Axud1	NM_001272999	37.8317	0	0	343	42.073	Yes	No	Yes	No
Drip	NM_165833	9.22175	43.0883	4.67246	11	52.7245	No	Yes	No	No
Grasp65	NM_140903	42.5566	68.8557	1.61798	176	54.9155	Yes	Yes	Yes	No
Prx6005	NM_078739	33.9647	59.8642	1.76254	207	44.0537	Yes	Yes	Yes	No
Cpr73D	NM_001316452	0	0	NA	0	NA	No	No	No	No
CG6950	NM_169437	50.4105	63.0031	1.2498	476	78.7871	Yes	Yes	Yes	No
TwdlM	NM_143227	0	0	NA	0	NA	No	No	No	No
TwdlN	NM_170281	0	0	NA	0	NA	No	No	No	No
TwdlO	NM_143230	0	0	NA	0	NA	No	No	No	No
TwdlH	NM_143233	0	0	NA	0	NA	No	No	No	No
TwdlJ	NM_143232	0	0	NA	0	NA	No	No	No	No
TwdlK	NM_143231	0	0	NA	0	NA	No	No	No	No
TwdlD	NM_143235	0	0	NA	1	72.5743	No	No	No	No
TwdlE	NM_135313	0	0	NA	0	NA	No	No	No	No
TwdlF	NM_141186	0	0	NA	0	NA	No	No	No	No
TwdlG	NM_001300226	0	0	NA	0	NA	No	No	No	No
TwdlB	NM_143229	0	0	NA	0	NA	No	No	No	No
TwdlC	NM_143262	0	0	NA	0	NA	No	No	No	No
ND-42	NM_169990	101.197	137.424	1.35799	115	91.2585	Yes	Yes	Yes	No
TwdlY	NM_167540	0	0	NA	0	NA	No	No	No	No
TwdlZ	NM_167541	0	0	NA	0	NA	No	No	No	No
CG14153	NM_140147	0	0	NA	0	NA	No	No	No	No
TwdlV	NM_141189	0	0	NA	0	NA	No	No	No	No
TwdlW	NM_142349	0	0	NA	0	NA	No	No	No	No
TwdlP	NM_143228	0	0	NA	0	NA	No	No	No	No
TwdlQ	NM_143239	0	0	NA	0	NA	No	No	No	No
CG14154	NM_168418	0	0	NA	1	16.2442	No	No	No	No
ND-49	NM_001272135	66.2812	192.831	2.90929	282	89.6889	Yes	Yes	Yes	No
CG15209	NM_132426	2.8417	30.3856	10.6927	19	50.5236	No	Yes	No	No
CG15208	NM_001298170	0	0	NA	0	NA	No	No	No	No
up	NM_001298285	0	2.04151	NA	2	27.3163	No	No	No	No
CG15201	NM_132463	0	0	NA	0	NA	No	No	No	No
CG15200	NM_132469	0	0	NA	0	NA	No	No	No	No
CG15203	NM_001298176	0	0	NA	0	NA	No	No	No	No
CG15202	NM_001258689	0.834921	0	0	2	81.144	No	No	No	No
CG18324	NM_137091	4.74994	0	0	22	38.378	No	No	No	No
CG18635	NM_137423	0.0654754	0	0	0	NA	No	No	No	No
Gos28	NM_142482	64.9811	17.5683	0.27036	251	48.0458	Yes	Yes	Yes	No
Sid	NM_143370	0	0	NA	0	NA	No	No	No	No
AdoR	NM_143515	0.0546827	0	0	0	NA	No	No	No	No
Sin	NM_001170015	23.2373	1.21468	0.0522731	138	36.9765	Yes	No	Yes	No
CG31908	NM_001298770	68.5375	7.57428	0.110513	275	55.0898	Yes	No	Yes	No
CG31909	NM_001169429	0	0	NA	0	NA	No	No	No	No
rols	NM_168487	0.0220066	0	0	2	81.1326	No	No	No	No
CG31904	NM_164768	0	0	NA	0	NA	No	No	No	No
CG3209	NM_001299889	48.4409	28.4316	0.586935	514	45.3598	Yes	Yes	Yes	No
CG31907	NM_001298776	0	0	NA	0	NA	No	No	No	No
eloF	NM_141699	0	0.787418	NA	0	NA	No	No	No	No
Rbp1-like	NM_001201656	20.4351	9.03602	0.442181	578	52.6562	Yes	No	Yes	No
Acyp	NM_001298987	0	0	NA	0	NA	No	No	No	No
CG33051	NM_176344	5.09501	1.9457	0.381884	73	37.0577	No	No	No	No
CG33052	NM_176345	40.9103	12.97	0.317036	124	54.0445	Yes	Yes	Yes	No
CG33506	NM_001014528	52.0504	67.4368	1.29561	166	74.8468	Yes	Yes	Yes	No
Als2	NM_141090	22.0547	0.646215	0.0293005	182	44.087	Yes	No	Yes	No
CG33509	NM_001014494	0	0	NA	0	NA	No	No	No	No
Dgp-1	NM_137458	23.1669	4.36294	0.188326	150	64.026	Yes	No	Yes	No
fd96Ca	NM_001300587	0	0	NA	0	NA	No	No	No	No
CG43084	NM_001259844	0	0	NA	0	NA	No	No	No	No
CG4500	NM_135852	0	0	NA	0	NA	No	No	No	No
Idh	NM_168265	308.001	382.832	1.24296	904	104.367	Yes	Yes	Yes	No
RacGAP84C	NM_057356	0	0	NA	1	34.077	No	No	No	No
Ide	NM_079458	22.642	41.1526	1.81754	98	69.1556	Yes	Yes	No	No
CG3061	NM_142071	70.6863	27.8878	0.394529	386	58.7253	Yes	Yes	Yes	No
CG30010	NM_001273907	16.715	16.3242	0.976621	120	47.4414	No	No	Yes	No
CG3065	NM_138017	48.5529	6.42774	0.132386	316	54.6201	Yes	No	Yes	No
CG6984	NM_137343	27.7136	12.7	0.458261	121	47.446	Yes	Yes	Yes	No
Pxt	NM_142391	344.722	887.713	2.57515	899	134.348	Yes	Yes	Yes	No
Pxn	NM_206254	0	0	NA	0	NA	No	No	No	No
otk2	NM_138561	3.87518	0.910688	0.235005	40	19.5309	No	No	No	No
Dsor1	NM_078543	66.8354	15.9885	0.239222	377	57.0847	Yes	Yes	Yes	No
CG43083	NM_001259843	0	0	NA	0	NA	No	No	No	No
Pxd	NM_206501	0	0	NA	0	NA	No	No	No	No
CG12006	NM_139575	50.3392	0	0	493	33.6863	Yes	No	Yes	No
CG12007	NM_141255	18.6854	6.85023	0.366608	109	22.9006	Yes	Yes	Yes	No
CG12004	NM_001299970	71.9441	63.4332	0.881702	37	58.588	Yes	Yes	No	No
RpII33	NM_058071	53.8868	60.0867	1.11506	258	66.3093	Yes	Yes	Yes	No
CG12003	NM_139368	0	0	NA	0	NA	No	No	No	No
osp	NM_001169504	13.989	1.10316	0.0788594	323	21.0894	Yes	No	Yes	No
CG12009	NM_139542	0	0	NA	0	NA	No	No	No	No
eIF2B-alpha	NM_143495	34.5644	20.2903	0.587028	162	51.204	Yes	Yes	Yes	No
osk	NM_206464	265.766	34.8692	0.131203	1261	53.4388	Yes	Yes	Yes	No
Nf1	NM_001276049	7.58484	11.2896	1.48844	66	97.4	Yes	Yes	No	No
osa	NM_079668	67.7991	22.8008	0.3363	451	46.2106	Yes	Yes	Yes	No
pes	NM_164777	106.873	72.5827	0.679149	592	69.8525	Yes	Yes	Yes	No
ver	NM_140330	10.8722	3.83254	0.352508	55	51.0691	No	No	No	No
pelo	NM_057634	39.4636	17.0326	0.431603	97	85.6944	Yes	Yes	No	No
tef	NM_079042	82.5645	0	0	605	32.1477	Yes	No	Yes	No
Kal1	NM_142963	5.21061	7.83502	1.50367	51	75.2294	No	Yes	No	No
CG10352	NM_001272539	0	0	NA	0	NA	No	No	No	No
CG10353	NM_167312	7.81613	5.25084	0.671796	11	77.6138	Yes	Yes	No	No
CG10357	NM_139564	0	0	NA	0	NA	No	No	No	No
CG6785	NM_135694	1.04541	0	0	9	49.869	No	No	No	No
CG12263	NM_137488	18.9887	21.8439	1.15037	92	82.3235	Yes	Yes	No	No
CkIIalpha-i3	NM_001299961	9.71551	1.53525	0.158021	65	51.7587	Yes	No	No	No
CG12264	NM_135689	51.9353	39.1698	0.754203	306	77.7405	Yes	Yes	Yes	No
CG9471	NM_141686	56.1466	56.5046	1.00638	525	57.6379	Yes	Yes	Yes	No
unc79	NM_142538	0.013766	0	0	0	NA	No	No	No	No
Ubc84D	NM_079536	0	0	NA	0	NA	No	No	No	No
CG12269	NM_001260259	0	0	NA	1	47.2875	No	No	No	No
CG6788	NM_133026	0	0	NA	0	NA	No	No	No	No
CG5326	NM_142803	0.63471	0	0	8	78.7088	No	No	No	No
CG5321	NM_132739	0	1.91306	NA	0	NA	No	No	No	No
mahj	NM_001259522	36.2221	12.9312	0.356997	305	48.1123	Yes	Yes	Yes	No
CG8870	NM_169517	0	0	NA	0	NA	No	No	No	No
CG1529	NM_134577	36.9647	0.680299	0.018404	110	42.0749	Yes	No	Yes	No
CG8878	NM_206099	41.244	9.03686	0.219107	159	54.2155	Yes	Yes	Yes	No
CG1835	NM_134560	0.304164	0	0	0	NA	No	No	No	No
Taz	NM_058084	33.9906	2.09785	0.0617186	249	58.642	Yes	No	Yes	No
CG1523	NM_143378	27.6071	6.59246	0.238796	197	43.1528	Yes	Yes	Yes	No
CG45116	NM_001300218	0	0	NA	0	NA	No	No	No	No
CG2336	NM_169148	0	0	NA	0	NA	No	No	No	No
CG7789	NM_143471	41.2773	53.671	1.30025	151	65.5359	Yes	Yes	Yes	No
CG7786	NM_137257	0	0	NA	0	NA	No	No	No	No
Sec61gamma	NM_001298521	250.391	257.812	1.02964	1245	43.3616	Yes	Yes	Yes	No
E(spl)m7-HLH	NM_080505	0	0	NA	0	NA	No	No	No	No
Tao	NM_001201743	147.704	3.52825	0.0238874	1148	41.1713	Yes	Yes	Yes	No
CG7781	NM_001298816	0	1.44693	NA	2	87.4246	No	No	No	No
sced	NM_136375	49.319	13.669	0.277154	359	63.4122	Yes	Yes	Yes	No
Mat89Ba	NM_142273	21.8727	21.6286	0.988839	17	49.2138	Yes	Yes	No	No
CG6439	NM_142743	75.1335	76.1551	1.0136	184	75.8988	Yes	Yes	Yes	No
CG6435	NM_137321	0	0	NA	0	NA	No	No	No	No
boca	NM_165541	49.7108	42.7857	0.860692	302	56.6304	Yes	Yes	Yes	No
CG6431	NM_135598	0	0	NA	203	43.582	No	No	Yes	No
CG14196	NM_133139	0.0709659	0	0	0	NA	No	No	No	No
M6	NM_001275237	3.17776	5.39348	1.69726	58	46.5742	No	No	No	No
ATPsynepsilonL	NM_001104266	0	0	NA	1	25.7405	No	No	No	No
CG14194	NM_133132	43.85	1.11021	0.0253183	273	43.8947	Yes	No	Yes	No
CG1789	NM_132276	51.1477	8.58571	0.167861	193	48.8462	Yes	No	Yes	No
CG14195	NM_001298501	0	0	NA	0	NA	No	No	No	No
CG6195	NM_142565	69.6037	49.2401	0.707435	321	60.9287	Yes	Yes	Yes	No
Six4	NM_140999	0.440756	0	0	3	109.183	No	No	No	No
CG1785	NM_132274	53.1875	24.2504	0.455942	218	57.9627	Yes	Yes	Yes	No
melt	NM_001274566	0.509675	0.58391	1.14565	5	124.811	No	No	No	No
CG11007	NM_001299688	72.758	57.3068	0.787635	522	53.159	Yes	Yes	Yes	No
CG17378	NM_135229	0	0	NA	0	NA	No	No	No	No
CG11000	NM_001260007	0.393266	0	0	7	47.2772	No	No	No	No
Mf	NM_001300405	0	0	NA	4	64.8565	No	No	No	No
Rpt4R	NM_001300110	0	0	NA	0	NA	No	No	No	No
CG6847	NM_001298468	0.0842555	0	0	0	NA	No	No	No	No
Gr36a	NM_165205	0	0	NA	0	NA	No	No	No	No
Gr36c	NM_165207	0	0	NA	0	NA	No	No	No	No
ATPsyngamma	NM_170425	242.174	282.344	1.16587	947	105.035	Yes	Yes	Yes	No
CG13407	NM_142752	0	0	NA	0	NA	No	No	No	No
Grip128	NM_132802	44.7297	6.88558	0.153938	150	60.0461	Yes	Yes	Yes	No
endos	NM_001274891	274.088	871.687	3.18031	815	112.263	Yes	Yes	Yes	No
Mp	NM_001300031	0.473416	3.6158	7.63768	1	69.1123	No	No	No	No
Ms	NM_001300574	0	0	NA	0	NA	No	No	No	No
Obp83g	NM_169126	0	0	NA	0	NA	No	No	No	No
Obp83a	NM_001300260	0	0	NA	0	NA	No	No	No	No
Obp83b	NM_079518	0	0	NA	0	NA	No	No	No	No
RNaseX25	NM_079242	53.2199	93.377	1.75455	420	52.5259	Yes	Yes	Yes	No
Cby	NM_142732	0	0	NA	0	NA	No	No	No	No
CG4497	NM_001201778	46.2601	4.26309	0.0921548	380	42.1536	Yes	No	Yes	No
CG4496	NM_001298779	4.2619	0	0	33	38.0152	No	No	No	No
CG4495	NM_001103640	28.1698	76.4847	2.71513	268	67.22	Yes	Yes	Yes	No
CG30355	NM_165617	0	0	NA	0	NA	No	No	No	No
eIF-2alpha	NM_001298400	152.7	68.3408	0.44755	836	55.1508	Yes	Yes	Yes	No
eEF1delta	NM_135517	326.278	858.695	2.63179	2252	69.5579	Yes	Yes	Yes	No
Cbp80	NM_080011	60.8006	23.2591	0.382548	555	47.4846	Yes	Yes	Yes	No
phtf	NM_136388	29.3137	12.7517	0.43501	143	57.4603	Yes	Yes	Yes	No
Myd88	NM_001273892	26.8851	9.47722	0.352508	158	58.9806	Yes	Yes	Yes	No
Or42b	NM_078900	0	0	NA	0	NA	No	No	No	No
CG17982	NM_001298078	11.6265	5.99395	0.515543	26	38.815	No	No	No	No
Or42a	NM_078898	0	0	NA	0	NA	No	No	No	No
thetaTry	NM_078969	0	0	NA	0	NA	No	No	No	No
CG13409	NM_142747	0	0	NA	0	NA	No	No	No	No
PRL-1	NM_001273558	179.751	34.3714	0.191217	554	52.3367	Yes	Yes	Yes	No
Sfp24Bc	NM_001169391	0	0	NA	0	NA	No	No	No	No
SP2353	NM_001299545	0	0	NA	0	NA	No	No	No	No
CG16957	NM_135806	0.235167	0	0	0	NA	No	No	No	No
Syx8	NM_079389	25.8774	3.51366	0.135781	103	51.9593	Yes	No	Yes	No
RpI12	NM_079715	31.7964	25.4993	0.801956	333	34.2649	No	No	Yes	No
DOR	NM_168084	18.3143	42.9871	2.34719	278	60.4047	Yes	Yes	Yes	No
Syx5	NM_134305	67.2549	24.8415	0.369363	355	48.908	Yes	Yes	Yes	No
Syx6	NM_206092	53.0265	8.65648	0.163248	479	41.1748	Yes	No	Yes	No
Syx7	NM_168906	71.4657	49.2319	0.688888	274	67.9744	Yes	Yes	Yes	No
SWIP	NM_132888	10.4592	1.57435	0.150524	75	39.5719	Yes	No	No	No
CG17186	NM_142582	27.8091	0	0	129	41.6314	Yes	No	Yes	No
CG17187	NM_141799	22.5389	10.0604	0.446358	19	41.6745	Yes	No	No	No
CG17180	NM_138193	11.5859	5.30935	0.458261	75	31.6395	No	No	No	No
CG4950	NM_001275005	0	0	NA	1	25.7467	No	No	No	No
CG10822	NM_137606	0	0	NA	0	NA	No	No	No	No
La	NM_057666	175.25	21.3213	0.121662	853	43.8532	Yes	Yes	Yes	No
CG17189	NM_143277	0	0	NA	0	NA	No	No	No	No
Pop2	NM_168484	128.59	98.6696	0.76732	185	70.5833	Yes	Yes	Yes	No
CG44335	NM_001300280	0	0	NA	0	NA	No	No	No	No
CanA1	NM_001260449	0	0	NA	0	NA	No	No	No	No
CG34051	NM_001038827	0	0	NA	0	NA	No	No	No	No
Iris	NM_134726	0.482807	1.84376	3.81884	1	59.3426	No	No	No	No
CG6893	NM_140796	0	0	NA	0	NA	No	No	No	No
CG31759	NM_165001	13.6881	6.23808	0.455729	124	53.7372	Yes	Yes	Yes	No
CG34054	NM_001038851	0.570657	0	0	1	59.8176	No	No	No	No
CG34057	NM_001038891	0	0	NA	0	NA	No	No	No	No
CG34056	NM_001038890	0	0	NA	0	NA	No	No	No	No
CG43659	NM_001274221	0	0	NA	0	NA	No	No	No	No
CG43658	NM_001272714	20.3525	2.28307	0.112176	142	53.9041	Yes	Yes	Yes	No
CG31751	NM_165260	9.81587	14.6784	1.49538	63	70.5962	Yes	Yes	No	No
CG31750	NM_165208	0	0	NA	0	NA	No	No	No	No
CG31021	NM_170513	0	0	NA	0	NA	No	No	No	No
Lk	NM_080154	0	0	NA	0	NA	No	No	No	No
CG4009	NM_001275726	340.145	1890.6	5.55823	3730	36.7526	Yes	Yes	Yes	No
CG4004	NM_132596	16.6782	0	0	136	56.3721	Yes	No	Yes	No
CG4000	NM_142649	0	0	NA	0	NA	No	No	No	No
CG12934	NM_001299361	0	0	NA	1	43.0585	No	No	No	No
CG4650	NM_135878	0	0	NA	0	NA	No	No	No	No
CG42658	NM_001201753	0	0	NA	0	NA	No	No	No	No
CG42659	NM_001201906	0	0	NA	0	NA	No	No	No	No
Rim2	NM_001258911	20.956	4.99593	0.238401	142	42.9083	Yes	No	Yes	No
CG17239	NM_001272991	0	0	NA	0	NA	No	No	No	No
CG10516	NM_140562	11.8177	5.8232	0.492753	74	42.7643	Yes	No	No	No
CG17237	NM_134822	0	0	NA	0	NA	No	No	No	No
CG17234	NM_164470	0	0	NA	0	NA	No	No	No	No
CG42656	NM_001202263	0	0	NA	3	44.9358	No	No	No	No
CG17233	NM_001259911	46.2683	1.96809	0.0425366	375	26.3469	Yes	No	Yes	No
CG17230	NM_001300360	15.5504	6.65628	0.428046	66	68.9119	Yes	No	No	No
CG42655	NM_001202204	0	0	NA	0	NA	No	No	No	No
Nse4	NM_135561	36.5803	51.9524	1.42023	128	46.1824	Yes	Yes	Yes	No
Ir93a	NM_142667	0	0	NA	0	NA	No	No	No	No
Nse1	NM_001273216	43.8625	33.7896	0.770352	220	43.1799	Yes	Yes	Yes	No
CG14527	NM_143388	0	0.83306	NA	0	NA	No	No	No	No
CG14526	NM_143389	1.6795	3.57338	2.12764	17	41.9893	No	No	No	No
CG8765	NM_140884	32.2846	0	0	146	46.669	Yes	No	Yes	No
CG14529	NM_143384	0	0	NA	0	NA	No	No	No	No
CG14528	NM_143386	0	0	NA	0	NA	No	No	No	No
Tusp	NM_001202374	6.90967	5.23265	0.757295	49	91.3872	Yes	Yes	No	No
CG10631	NM_136154	13.1275	0.100937	0.00768893	116	50.1806	Yes	No	Yes	No
His1:CG33804	NM_001032115	0	0	NA	0	NA	No	No	No	No
CG10635	NM_139704	188.469	374.365	1.98634	647	52.1764	Yes	Yes	Yes	No
CG10639	NM_136079	17.3674	3.46034	0.199244	123	57.1538	Yes	No	Yes	No
CG10638	NM_001300121	57.6604	109.099	1.8921	123	83.6456	Yes	Yes	Yes	No
CG18764	NM_144455	10.0155	2.89877	0.289428	34	45.7987	Yes	No	No	No
CG12857	NM_137143	0	0	NA	0	NA	No	No	No	No
CG12851	NM_001299937	0.194623	0	0	1	51.5458	No	No	No	No
CG12853	NM_144120	0	0	NA	0	NA	No	No	No	No
CG12858	NM_001259394	0.111124	0	0	4	72.4729	No	No	No	No
nahoda	NM_001259545	2.12405	10.405	4.89865	12	80.3368	No	Yes	No	No
Obp22a	NM_164447	0	0	NA	2	82.4874	No	No	No	No
skd	NM_168879	48.8562	17.2334	0.352738	252	67.6899	Yes	Yes	Yes	No
Prosalpha4T1	NM_142653	0	0	NA	0	NA	No	No	No	No
Prosalpha4T2	NM_001299915	0.877315	0	0	0	NA	No	No	No	No
fd64A	NM_001259680	0	0	NA	0	NA	No	No	No	No
CG15461	NM_144034	0	0	NA	0	NA	No	No	No	No
Mhc	NM_165190	0.021594	0.692699	32.0782	1	11.1849	No	No	No	No
spok	NM_001110990	0	0	NA	0	NA	No	No	No	No
CG10189	NM_001273656	5.43199	0	0	15	47.6403	No	No	No	No
CG10188	NM_165305	32.223	5.2895	0.164153	290	44.2277	Yes	Yes	Yes	No
CG32599	NM_167398	0	0	NA	0	NA	No	No	No	No
CG10185	NM_142264	0	0	NA	0	NA	No	No	No	No
CG32225	NM_168843	0.148453	0	0	0	NA	No	No	No	No
CG10186	NM_001144370	0.049921	0	0	0	NA	No	No	No	No
CG32221	NM_168820	10.4582	0	0	107	20.5937	Yes	No	Yes	No
CG32590	NM_167414	18.3383	7.94948	0.43349	94	40.6526	No	No	No	No
CG32591	NM_001298327	0	0	NA	1	50.4093	No	No	No	No
dyl	NM_168078	0	0	NA	0	NA	No	No	No	No
CG7208	NM_142426	115.62	12.2506	0.105956	569	38.0327	Yes	Yes	Yes	No
ss	NM_057400	0	0	NA	1	46.849	No	No	No	No
sr	NM_001300455	0	0	NA	1	70.7931	No	No	No	No
CG7201	NM_001274645	0	0	NA	0	NA	No	No	No	No
CG7200	NM_001299102	20.3624	0.464243	0.022799	156	38.5829	Yes	No	Yes	No
wun2	NM_001299319	79.2148	2.47507	0.031245	430	36.7775	Yes	No	Yes	No
CG7206	NM_001258799	20.8317	0	0	211	51.8501	No	No	Yes	No
NijC	NM_001104291	0.689215	0	0	2	53.0245	No	No	No	No
st	NM_079384	0.255055	0.584409	2.2913	1	49.7318	No	No	No	No
Gpo-1	NM_001103862	2.45879	4.56073	1.85486	37	79.815	No	No	No	No
so	NM_057385	0.207166	0	0	0	NA	No	No	No	No
sn	NM_167143	75.5276	44.4127	0.588033	405	55.0485	Yes	Yes	Yes	No
sm	NM_001259500	12.7061	40.3402	3.17488	115	47.7542	Yes	Yes	Yes	No
sl	NM_057378	20.6603	0.31144	0.0150744	186	58.7893	Yes	No	Yes	No
sc	NM_057455	0	0	NA	0	NA	No	No	No	No
sa	NM_141054	0	0	NA	0	NA	No	No	No	No
E(spl)m3-HLH	NM_079785	0	0	NA	0	NA	No	No	No	No
se	NM_139978	0.547228	0	0	1	17.9268	No	No	No	No
CG10283	NM_001169535	7.94909	8.58649	1.08019	98	80.1759	Yes	Yes	No	No
Snap24	NM_079574	49.4234	10.6469	0.215422	322	46.4279	Yes	No	Yes	No
tty	NM_167744	3.91069	0.597371	0.152754	34	34.7297	Yes	No	No	No
Rad23	NM_001272123	308.249	51.0458	0.165599	2808	35.8776	Yes	Yes	Yes	No
ttv	NM_001274042	26.5743	2.29772	0.0864642	226	42.6135	Yes	No	Yes	No
Ance-4	NM_001299294	0	0	NA	0	NA	No	No	No	No
Ance-5	NM_133164	0.0677209	0	0	0	NA	No	No	No	No
tth	NM_001298287	60.3411	3.68693	0.0611014	243	70.5511	Yes	No	Yes	No
CG15696	NM_142664	0	0	NA	0	NA	No	No	No	No
Ance-2	NM_176028	0.0696547	0	0	0	NA	No	No	No	No
CG15695	NM_142663	0	0	NA	0	NA	No	No	No	No
CG32040	NM_168326	0	0	NA	0	NA	No	No	No	No
KrT95D	NM_079749	28.1857	4.09784	0.145387	220	55.0459	Yes	Yes	Yes	No
CG33276	NM_206296	24.2975	31.1769	1.28313	17	37.8073	No	No	No	No
CG11583	NM_001038900	67.1363	60.8618	0.906541	377	51.7224	Yes	Yes	Yes	No
CG11581	NM_001298306	0	0	NA	0	NA	No	No	No	No
CG11586	NM_139624	33.4842	18.115	0.541002	186	54.488	Yes	No	Yes	No
MFS1	NM_166564	0	0	NA	0	NA	No	No	No	No
CG11584	NM_132713	0	0	NA	0	NA	No	No	No	No
MFS3	NM_134728	0	0	NA	0	NA	No	No	No	No
CG11588	NM_001274800	0	0	NA	0	NA	No	No	No	No
jim	NM_143699	0.56711	0.708775	1.2498	1	100.925	No	No	No	No
MFS9	NM_169898	0	0	NA	0	NA	No	No	No	No
CG13724	NM_140709	0	0	NA	0	NA	No	No	No	No
CG13725	NM_140710	0	0	NA	0	NA	No	No	No	No
CG13727	NM_140712	0	0	NA	0	NA	No	No	No	No
CG13720	NM_139656	0	0	NA	0	NA	No	No	No	No
CG13721	NM_139655	0	0	NA	0	NA	No	No	No	No
CG13722	NM_139654	0	0	NA	0	NA	No	No	No	No
CG13723	NM_140707	0	0	NA	3	48.1266	No	No	No	No
Srp19	NM_057787	72.9756	61.8805	0.847962	533	51.6856	Yes	Yes	Yes	No
CG13728	NM_140717	0.0562402	0	0	0	NA	No	No	No	No
djl	NM_141429	0	0	NA	0	NA	No	No	No	No
CNT1	NM_136603	0	0	NA	0	NA	No	No	No	No
Dnz1	NM_058101	40.6182	0	0	341	36.8262	Yes	No	Yes	No
CCDC151	NM_140263	0	0	NA	0	NA	No	No	No	No
CG15073	NM_137518	9.626	0	0	41	38.3556	Yes	No	No	No
MTF-1	NM_001104090	15.5347	2.49451	0.160576	167	43.253	Yes	No	Yes	No
CG2224	NM_001276179	17.9477	10.8096	0.602285	97	53.2617	Yes	Yes	No	No
nonA-l	NM_001275717	36.9902	0.618655	0.0167248	272	26.2003	Yes	No	Yes	No
Glycogenin	NM_001259517	34.6261	17.591	0.508026	313	58.0825	Yes	Yes	Yes	No
CG9319	NM_001273709	12.8813	4.25441	0.330278	120	47.0982	Yes	No	Yes	No
CG9649	NM_142086	0	0	NA	0	NA	No	No	No	No
CG9313	NM_001299727	0	0	NA	0	NA	No	No	No	No
CG9312	NM_142056	0	0	NA	0	NA	No	No	No	No
Obp59a	NM_176249	0	0	NA	0	NA	No	No	No	No
CG9646	NM_137339	28.3468	1.52314	0.0537324	220	65.59	Yes	No	Yes	No
CG9317	NM_136208	0.062989	0	0	0	NA	No	No	No	No
CG9640	NM_001274110	0.438967	0	0	3	96.7148	No	No	No	No
CG9643	NM_001298643	33.854	9.34575	0.276061	201	37.9766	Yes	No	Yes	No
CG9314	NM_001273339	0	0	NA	0	NA	No	No	No	No
cbs	NM_137031	35.5935	2.2344	0.0627754	217	34.912	Yes	No	Yes	No
bonsai	NM_137847	89.106	71.8904	0.806797	384	44.7696	Yes	Yes	Yes	No
Sec71	NM_135831	13.4736	4.17819	0.310101	144	21.1883	Yes	Yes	Yes	No
ND-B14	NM_001273948	106.795	163.134	1.52754	452	76.4055	Yes	Yes	Yes	No
mRpL11	NM_079627	52.4287	29.5056	0.562776	247	48.0295	Yes	Yes	Yes	No
CG8993	NM_139459	64.3352	66.1847	1.02875	633	43.091	Yes	Yes	Yes	No
intr	NM_143376	0	0	NA	0	NA	No	No	No	No
CG8997	NM_001298983	0	0	NA	0	NA	No	No	No	No
su(r)	NM_167182	0.653464	1.12296	1.71848	6	40.479	No	No	No	No
Dll	NM_079133	0.133194	0	0	2	45.4213	No	No	No	No
CG13562	NM_138005	3.05796	0.636973	0.2083	21	31.5755	No	No	No	No
blanks	NM_139709	0.26898	0	0	0	NA	No	No	No	No
AdamTS-A	NM_206496	3.24832	5.11343	1.57418	44	94.7361	Yes	Yes	No	No
CycD	NM_167473	119.639	0.823831	0.00688596	876	43.1363	Yes	No	Yes	No
GCS2beta	NM_136000	60.9163	206.332	3.38714	252	117.082	Yes	Yes	Yes	No
CG31191	NM_001104380	0	0	NA	0	NA	No	No	No	No
CG7804	NM_001274945	0.411477	0	0	0	NA	No	No	No	No
CG6337	NM_001299466	0	0	NA	0	NA	No	No	No	No
CG6330	NM_143258	14.1424	9.75005	0.689418	58	48.6691	Yes	No	No	No
CG6332	NM_142742	0	0	NA	2	99.9594	No	No	No	No
CG6333	NM_001169988	0	0	NA	0	NA	No	No	No	No
nst	NM_140331	41.9861	12.1144	0.288534	248	51.1829	Yes	Yes	Yes	No
blw	NM_166554	485.938	745.831	1.53483	3311	110.064	Yes	Yes	Yes	No
CG6401	NM_001299618	14.5883	2.46082	0.168685	86	42.0422	Yes	No	No	No
blp	NM_001300420	47.3129	4.5486	0.0961386	192	40.5888	Yes	No	Yes	No
Su(P)	NM_079392	60.2385	23.6749	0.393019	534	45.8648	Yes	Yes	Yes	No
Mob4	NM_001259222	103.212	13.488	0.130683	561	51.4774	Yes	No	Yes	No
Muc26B	NM_144295	0	0	NA	3	37.2613	No	No	No	No
CG31446	NM_001275681	0	0	NA	0	NA	No	No	No	No
CG4797	NM_166625	0.160313	0	0	1	11.0737	No	No	No	No
Prx3	NM_079663	130.291	249.796	1.91721	431	70.0311	Yes	Yes	Yes	No
CG4793	NM_165139	0.463672	2.76227	5.95739	14	44.6002	No	No	No	No
CheB53b	NM_001014531	0	0	NA	0	NA	No	No	No	No
CheB53a	NM_001014530	0	0	NA	0	NA	No	No	No	No
CG17751	NM_142559	0	0	NA	0	NA	No	No	No	No
CG8483	NM_142007	0	0	NA	0	NA	No	No	No	No
CG17754	NM_001298117	25.9967	2.80679	0.107967	169	47.6718	Yes	No	Yes	No
l(1)G0045	NM_132008	16.3637	2.48455	0.151833	145	43.2443	Yes	No	Yes	No
flfl	NM_142047	73.7237	4.36699	0.0592346	422	32.8279	Yes	Yes	Yes	No
Mes-4	NM_170360	96.2259	17.6386	0.183304	891	54.1886	Yes	Yes	Yes	No
RpL9	NM_001298897	1728.8	138.435	0.0800758	6596	73.527	Yes	Yes	Yes	No
CG11999	NM_141270	72.2408	139.44	1.93021	167	55.4165	Yes	Yes	Yes	No
CG5660	NM_001300059	11.0204	1.74815	0.158629	90	33.1454	Yes	No	No	No
eIF-5A	NM_138034	2272.24	749.073	0.329663	23623	64.3232	Yes	Yes	Yes	No
Nup214	NM_143782	39.405	79.472	2.0168	234	50.7768	Yes	Yes	Yes	No
Wnt10	NM_135265	0	0	NA	0	NA	No	No	No	No
phr6-4	NM_057840	53.7789	0	0	604	33.2716	Yes	No	Yes	No
BG642167	NM_001043293	0	0	NA	0	NA	No	No	No	No
Ptp4E	NM_001169198	23.299	6.29335	0.270113	247	37.4231	Yes	Yes	Yes	No
lectin-21Cb	NM_134695	0	0	NA	0	NA	No	No	No	No
lectin-21Ca	NM_144385	0	0	NA	0	NA	No	No	No	No
CG13658	NM_143117	0.102054	0.467671	4.58261	1	47.9488	No	No	No	No
Amun	NM_167299	159.404	37.3422	0.234262	1138	51.9009	Yes	Yes	Yes	No
TrpA1	NM_001274671	0	0	NA	0	NA	No	No	No	No
2016-09-02	NM_001275835	72.3779	17.6601	0.243999	436	35.1276	Yes	Yes	Yes	No
2016-09-04	NM_167532	21.6748	0	0	175	24.7605	Yes	No	Yes	No
2016-09-05	NM_143704	18.5737	13.0948	0.705016	79	52.0044	Yes	Yes	No	No
Rrp47	NM_001298381	55.2582	53.0317	0.959708	381	56.7336	Yes	Yes	Yes	No
Hmx	NM_001300447	0	0	NA	0	NA	No	No	No	No
CG5150	NM_001300015	0	0	NA	0	NA	No	No	No	No
robl62A	NM_138266	0	0	NA	1	55.2961	No	No	No	No
CG9861	NM_137934	0	0	NA	0	NA	No	No	No	No
Hmu	NM_057811	86.4934	10.7946	0.124803	942	38.8822	Yes	Yes	Yes	No
CG9863	NM_137936	0	0	NA	0	NA	No	No	No	No
CG9864	NM_001274171	64.2319	130.681	2.03452	357	72.4769	Yes	Yes	Yes	No
Hmr	NM_132409	29.0531	1.90393	0.0655327	232	49.3665	Yes	No	Yes	No
Bug22	NM_135558	49.5351	8.29223	0.167401	213	51.9948	Yes	No	Yes	No
Hml	NM_079336	0.0108346	0.198603	18.3304	0	NA	No	No	No	No
CG1647	NM_143379	19.8	0.315054	0.0159118	146	35.526	Yes	No	Yes	No
CG1646	NM_001104488	16.4903	19.1858	1.16346	83	50.5055	Yes	Yes	No	No
CG1317	NM_139458	20.5562	25.7977	1.25499	235	45.8301	Yes	Yes	Yes	No
CG1640	NM_167369	108.787	23.7395	0.218219	799	31.4306	Yes	Yes	Yes	No
CG1315	NM_001275395	0	0	NA	0	NA	No	No	No	No
CG8195	NM_137205	29.9525	3.06972	0.102486	119	61.322	Yes	No	Yes	No
CG8199	NM_141648	30.1702	10.3245	0.342208	116	37.4762	Yes	Yes	Yes	No
CG1648	NM_001299324	0.58042	0.886611	1.52754	6	72.1288	No	No	No	No
vfl	NM_001258840	84.1066	5.1801	0.0615897	25	67.14	Yes	Yes	No	No
CG34266	NM_001104037	0	0	NA	0	NA	No	No	No	No
Dscam3	NM_001104355	0	0	NA	0	NA	No	No	No	No
CG34264	NM_001144392	0.409221	0	0	1	17.8827	No	No	No	No
Dscam1	NM_001273835	0	0.196787	NA	0	NA	No	No	No	No
CG34263	NM_001103989	0	0	NA	0	NA	No	No	No	No
CG34260	NM_001275191	0	0	NA	0	NA	No	No	No	No
CG34261	NM_001104186	33.8427	84.7238	2.50346	122	84.6337	Yes	Yes	Yes	No
CG34268	NM_001103995	0	0	NA	0	NA	No	No	No	No
CG34269	NM_001103996	0	0	NA	0	NA	No	No	No	No
AlkB	NM_206735	17.5659	17.4211	0.991758	115	47.4151	Yes	Yes	Yes	No
CG32816	NM_001297808	7.21012	17.3073	2.40041	52	53.717	No	Yes	No	No
Rh3	NM_079687	0	0	NA	0	NA	No	No	No	No
CG44812	NM_001299909	0	0	NA	0	NA	No	No	No	No
san	NM_080040	193.133	456.073	2.36144	553	118.263	Yes	Yes	Yes	No
Rh5	NM_001298930	0.113197	0	0	0	NA	No	No	No	No
CG32812	NM_130543	0	0	NA	0	NA	No	No	No	No
CG5543	NM_137988	24.3877	19.0228	0.780018	227	58.2907	Yes	Yes	Yes	No
CG5541	NM_206715	55.3418	12.3194	0.222606	267	62.1104	Yes	Yes	Yes	No
EcR	NM_001169590	25.8232	0.661103	0.0256011	213	48.7758	Yes	No	Yes	No
sas	NM_001275408	0.148335	0	0	1	71.7018	No	No	No	No
CG31997	NM_001297780	5.01373	20.104	4.00978	24	58.5761	No	No	No	No
scrib	NM_001170275	25.6618	0.665649	0.0259393	15	67.3862	Yes	No	No	No
CG5549	NM_137992	0	0	NA	4	27.2797	No	No	No	No
sav	NM_176544	32.8335	0.641633	0.019542	237	42.6242	Yes	No	Yes	No
sau	NM_001014460	73.0031	58.0332	0.794942	373	63.019	Yes	Yes	Yes	No
CG8736	NM_136550	0.281455	0	0	4	64.9396	No	No	No	No
CG34191	NM_001103884	65.6896	109.223	1.66272	443	60.4212	Yes	Yes	Yes	No
CG8735	NM_001299272	82.9727	69.0864	0.83264	166	69.5881	Yes	Yes	Yes	No
CG43795	NM_001103965	0.0295284	0	0	0	NA	No	No	No	No
CG34196	NM_001103894	0	0	NA	0	NA	No	No	No	No
CG43797	NM_001273083	0	0	NA	0	NA	No	No	No	No
CG43798	NM_001273114	0	0	NA	0	NA	No	No	No	No
CG34199	NM_001103910	0	0	NA	0	NA	No	No	No	No
CG8738	NM_136559	0	0	NA	0	NA	No	No	No	No
NANS	NM_141938	0	0	NA	0	NA	No	No	No	No
c11.1	NM_001298121	25.3178	5.17364	0.204348	217	43.3629	Yes	Yes	Yes	No
CG32240	NM_168082	0	0	NA	0	NA	No	No	No	No
Or9a	NM_078552	0	0	NA	1	77.4123	No	No	No	No
EDTP	NM_206151	74.642	22.1345	0.296542	331	46.2932	Yes	Yes	Yes	No
CG8134	NM_001298354	40.2926	2.30806	0.0572826	314	58.7667	Yes	No	Yes	No
CG42540	NM_001274492	0	0	NA	0	NA	No	No	No	No
PPYR1	NM_132784	0	0	NA	0	NA	No	No	No	No
CG13539	NM_001299830	0	0	NA	0	NA	No	No	No	No
CG13538	NM_137911	0	0	NA	0	NA	No	No	No	No
CG6938	NM_001274804	0	0	NA	0	NA	No	No	No	No
Cyp301a1	NM_136952	0	0	NA	0	NA	No	No	No	No
salm	NM_164966	0	0	NA	0	NA	No	No	No	No
CG13531	NM_001299819	13.3668	8.76576	0.655787	56	64.9204	Yes	Yes	No	No
CG6933	NM_001275168	0	0	NA	0	NA	No	No	No	No
CG13532	NM_137884	0	0	NA	0	NA	No	No	No	No
CG6937	NM_142809	133.663	188.169	1.40778	440	80.2892	Yes	Yes	Yes	No
lawc	NM_001258650	20.975	9.94345	0.474063	430	44.8038	No	No	Yes	No
Drep2	NM_001259293	127.249	13.855	0.108881	326	91.2384	Yes	Yes	Yes	No
Drep3	NM_136879	0	0	NA	0	NA	No	No	No	No
Drep1	NM_001273980	46.7048	3.92715	0.0840845	218	63.5018	Yes	No	Yes	No
Neu2	NM_141059	0	0	NA	3	27.3438	No	No	No	No
Drep4	NM_135787	19.3813	2.62513	0.135446	111	37.3623	Yes	No	Yes	No
Strip	NM_001274437	37.0481	11.1869	0.301955	261	49.2941	Yes	Yes	Yes	No
Rph	NM_001272499	0	0	NA	0	NA	No	No	No	No
salr	NM_001259054	0	0	NA	0	NA	No	No	No	No
sals	NM_169390	0	0	NA	0	NA	No	No	No	No
salt	NM_143632	0	0	NA	0	NA	No	No	No	No
CG6034	NM_140748	0	0	NA	0	NA	No	No	No	No
Ir7a	NM_132178	0	0	NA	0	NA	No	No	No	No
Ir7b	NM_132182	0.194583	0	0	1	44.3927	No	No	No	No
Ir7c	NM_001258643	0.816652	0	0	3	37.227	No	No	No	No
Ir7d	NM_001144703	0	0	NA	0	NA	No	No	No	No
Ir7e	NM_001144704	0	0	NA	0	NA	No	No	No	No
Ir7f	NM_001144705	0	0	NA	0	NA	No	No	No	No
Ir7g	NM_132185	0	0	NA	0	NA	No	No	No	No
elav	NM_001258518	0.798594	4.06627	5.09178	1	2.46191	No	No	No	No
FBXO11	NM_001275512	67.1614	3.42152	0.0509448	465	47.184	Yes	Yes	Yes	No
kibra	NM_001300400	22.0321	0	0	184	52.2794	Yes	No	Yes	No
Debcl	NM_176098	86.4843	0.668336	0.00772783	584	41.8122	Yes	No	Yes	No
CG31921	NM_164380	0	0	NA	0	NA	No	No	No	No
CG31926	NM_001272941	354.071	1651.48	4.66427	2589	57.4198	Yes	Yes	Yes	No
CG31251	NM_169772	18.1392	3.27262	0.180418	50	50.0179	Yes	No	No	No
CG31928	NM_001272940	315.285	1052.8	3.3392	2618	75.3227	Yes	Yes	Yes	No
CG31259	NM_001300304	0.188776	0.432542	2.2913	1	58.4832	No	No	No	No
Ocrl	NM_130606	38.7673	5.01079	0.129253	145	45.9089	Yes	Yes	Yes	No
slou	NM_001275879	0	0	NA	0	NA	No	No	No	No
slow	NM_139641	0.334193	1.53147	4.58261	2	31.8649	No	No	No	No
CG4945	NM_176203	0	0.338534	NA	0	NA	No	No	No	No
CG3264	NM_001299780	0	0	NA	0	NA	No	No	No	No
CG3267	NM_144467	30.898	17.9104	0.579661	134	58.9428	Yes	Yes	Yes	No
CG4949	NM_167554	67.4613	24.1031	0.357288	387	46.4745	Yes	Yes	Yes	No
Hrb98DE	NM_170370	253.925	28.9137	0.113867	2176	37.1043	Yes	Yes	Yes	No
robl	NM_079047	127.972	151.868	1.18673	549	32.7375	Yes	Yes	Yes	No
CG32698	NM_001272461	1.46513	0	0	9	43.3027	No	No	No	No
Csl4	NM_135648	30.6054	14.1261	0.461557	143	47.9249	Yes	No	Yes	No
Aats-pro	NM_001274408	6.18153	14.1638	2.2913	50	49.9452	No	No	No	No
CG32695	NM_001298136	0	0	NA	0	NA	No	No	No	No
CG32694	NM_001298140	0	2.51141	NA	0	NA	No	No	No	No
betaggt-I	NM_080361	38.1518	11.522	0.302005	192	56.4549	Yes	Yes	Yes	No
Sk1	NM_132489	0.132626	0	0	1	45.6923	No	No	No	No
Sk2	NM_139505	37.4623	7.95065	0.21223	151	73.3713	Yes	Yes	Yes	No
Adi1	NM_001104107	57.6978	42.3942	0.734764	364	53.4791	Yes	Yes	Yes	No
CG3088	NM_140077	0	0	NA	0	NA	No	No	No	No
CG3085	NM_001274220	16.9324	1.82575	0.107826	55	47.4627	Yes	No	No	No
Pdk1	NM_001274254	103.88	16.2155	0.156098	942	51.3724	Yes	Yes	Yes	No
Pzl	NM_001316564	0	0	NA	0	NA	No	No	No	No
CG15260	NM_135905	0	0	NA	0	NA	No	No	No	No
CG42649	NM_001202035	0	0	NA	0	NA	No	No	No	No
CG15269	NM_135895	0	0	NA	0	NA	No	No	No	No
CG17574	NM_001273997	92.7156	8.06733	0.0870115	611	31.0016	Yes	No	Yes	No
CG12061	NM_001110997	0	0	NA	1	136.413	No	No	No	No
CG12065	NM_132265	12.045	23.2113	1.92704	84	32.2866	Yes	Yes	No	No
jigr1	NM_143152	178.902	3.55936	0.0198955	475	39.0203	Yes	No	Yes	No
CG12069	NM_143562	0	0	NA	0	NA	No	No	No	No
cin	NM_057682	58.5885	14.2847	0.243815	325	42.342	Yes	Yes	Yes	No
CSN8	NM_164809	78.0325	110.819	1.42017	406	53.412	Yes	Yes	Yes	No
CG3887	NM_001273141	87.7873	88.5882	1.00912	547	37.9725	Yes	Yes	Yes	No
CG3880	NM_138118	0	0	NA	3	18.3147	No	No	No	No
Cka	NM_001259008	47.0056	21.307	0.453285	264	48.6645	Yes	Yes	Yes	No
fz4	NM_078513	40.3047	2.48105	0.0615574	282	41.9863	Yes	No	Yes	No
CG13298	NM_139780	130.702	63.143	0.483106	677	34.4445	Yes	Yes	Yes	No
PMP34	NM_168081	55.1822	22.2941	0.404008	255	52.1321	Yes	Yes	Yes	No
CG10376	NM_136055	27.6563	0.921732	0.033328	133	56.1751	Yes	No	Yes	No
CG10375	NM_142928	44.8896	22.3252	0.497337	159	60.1803	Yes	Yes	Yes	No
vari	NM_206011	3.52868	1.90242	0.53913	26	72.6858	No	No	No	No
RanGAP	NM_057364	79.6009	92.341	1.16005	397	49.8831	Yes	Yes	Yes	No
CG2680	NM_130665	0	0	NA	0	NA	No	No	No	No
CG2681	NM_130666	0	0	NA	1	18.8449	No	No	No	No
CG2685	NM_130667	29.1486	0.354314	0.0121555	74	39.9167	Yes	No	No	No
Awh	NM_001274450	0	0	NA	0	NA	No	No	No	No
Rbf2	NM_079648	48.9615	16.8402	0.343948	322	41.0783	Yes	Yes	Yes	No
CG7414	NM_001202226	99.0305	20.0836	0.202802	587	97.7513	Yes	Yes	Yes	No
PTP-ER	NM_166465	24.4907	1.11673	0.0455981	113	55.1212	Yes	No	Yes	No
vkg	NM_001273143	0.560278	2.07378	3.70133	160	65.8247	No	Yes	Yes	No
CG9451	NM_001275121	0	0	NA	1	52.0217	No	No	No	No
CG9452	NM_140862	0.102054	0	0	0	NA	No	No	No	No
CG12288	NM_135978	54.8838	6.79759	0.123854	312	41.732	Yes	No	Yes	No
CG12289	NM_140208	0	0	NA	0	NA	No	No	No	No
CG9109	NM_001298721	0	0	NA	0	NA	No	No	No	No
CG9106	NM_167433	0	0	NA	0	NA	No	No	No	No
CG9107	NM_164673	25.6758	14.4231	0.561739	155	50.7089	Yes	Yes	Yes	No
dome	NM_078688	47.9406	4.5019	0.0939058	417	36.0664	Yes	Yes	Yes	No
Ndg	NM_206074	0	0	NA	0	NA	No	No	No	No
CG9101	NM_132783	0	0	NA	0	NA	No	No	No	No
pUf68	NM_001169844	59.3814	24.771	0.41715	301	42.9367	Yes	Yes	Yes	No
Cisd2	NM_143427	112.74	286.665	2.5427	655	74.7377	Yes	Yes	Yes	No
CG15485	NM_135733	0	0	NA	0	NA	No	No	No	No
CG8858	NM_136902	14.3142	54.2413	3.78933	151	79.0735	Yes	Yes	Yes	No
CG15483	NM_135748	0	0	NA	0	NA	No	No	No	No
Kank	NM_001202004	0.551462	0.148655	0.269565	6	27.9184	No	No	No	No
CG15480	NM_135776	0	0	NA	0	NA	No	No	No	No
CG8852	NM_134946	0	0	NA	0	NA	No	No	No	No
CG8851	NM_164544	0	0	NA	0	NA	No	No	No	No
Lerp	NM_170290	16.0565	6.74664	0.420182	89	39.2824	Yes	Yes	No	No
CG1814	NM_136655	11.6068	4.99767	0.43058	77	83.4695	Yes	No	No	No
CG1815	NM_143624	27.5976	0.922291	0.0334192	369	34.9117	Yes	No	Yes	No
CG8854	NM_136905	0.330567	0	0	2	31.3486	No	No	No	No
CG11396	NM_140998	38.959	40.1701	1.03109	173	44.7808	Yes	Yes	Yes	No
CG11395	NM_001299592	1.22426	2.1578	1.76254	13	42.6119	No	No	No	No
JYalpha	NM_001110622	0.0417461	0	0	0	NA	No	No	No	No
CG11391	NM_142573	0	0	NA	0	NA	No	No	No	No
CG18301	NM_135575	0	0	NA	0	NA	No	No	No	No
Rbp4	NM_057587	0.100569	0.921732	9.16521	0	NA	No	No	No	No
CG11399	NM_140997	74.2384	10.7168	0.144356	551	51.1157	Yes	Yes	Yes	No
aurA	NM_057401	68.9148	208.136	3.02019	146	73.8457	Yes	Yes	Yes	No
CG15630	NM_175961	0	0	NA	0	NA	No	No	No	No
aurB	NM_057988	68.2894	70.9581	1.03908	555	47.6183	Yes	Yes	Yes	No
CG12268	NM_001260343	0	0	NA	0	NA	No	No	No	No
twit	NM_136223	0	0	NA	0	NA	No	No	No	No
CG13074	NM_140578	0	0	NA	0	NA	No	No	No	No
unpg	NM_057798	0.0883546	0	0	2	66.6089	No	No	No	No
cmet	NM_080254	18.1835	5.42111	0.298134	126	81.9308	Yes	Yes	Yes	No
CG6454	NM_142992	23.8128	2.56908	0.107886	164	52.607	Yes	Yes	Yes	No
antr	NM_001259355	0	0	NA	0	NA	No	No	No	No
CG13884	NM_138191	0.844366	0	0	0	NA	No	No	No	No
CG13887	NM_001299962	143.933	441.216	3.06543	1042	82.9629	Yes	Yes	Yes	No
G9a	NM_001272159	105.505	14.3565	0.136074	608	55.2064	Yes	Yes	Yes	No
CG13077	NM_136146	0	0	NA	1	55.3789	No	No	No	No
CG43403	NM_001258920	0	0	NA	0	NA	No	No	No	No
Nep3	NM_001258847	0	0	NA	0	NA	No	No	No	No
Nep2	NM_001275331	21.5292	48.3128	2.24406	121	84.3971	Yes	Yes	Yes	No
Nep1	NM_001297997	0.0995226	0	0	0	NA	No	No	No	No
Nep5	NM_001300625	0	0	NA	0	NA	No	No	No	No
Nep4	NM_142647	0	0	NA	1	41.2597	No	No	No	No
Apf	NM_164880	17.3968	36.1007	2.07514	3	36.0666	No	Yes	No	No
CG17977	NM_144144	13.5811	0	0	70	42.2597	No	No	No	No
CG12111	NM_001272412	0	0	NA	0	NA	No	No	No	No
CG11023	NM_001169365	0.154538	0	0	0	NA	No	No	No	No
MsR2	NM_001274394	0	0	NA	0	NA	No	No	No	No
zpg	NM_001274549	181.648	4.32707	0.0238212	1713	36.3184	Yes	No	Yes	No
Cad89D	NM_142297	0	0	NA	0	NA	No	No	No	No
Iswi	NM_078995	68.8031	40.2108	0.584432	382	66.2237	Yes	Yes	Yes	No
ttm3	NM_136286	0	0	NA	0	NA	No	No	No	No
ttm2	NM_138179	0	0	NA	0	NA	No	No	No	No
CG15876	NM_139668	0	0	NA	0	NA	No	No	No	No
CG15877	NM_139461	33.957	6.54441	0.192726	192	41.5947	Yes	No	Yes	No
CG15873	NM_138066	0	0	NA	0	NA	No	No	No	No
CG15870	NM_136997	3.09076	0	0	18	73.0675	No	No	No	No
CG13081	NM_001299158	0	0	NA	0	NA	No	No	No	No
gish	NM_001275696	155.206	5.46145	0.0351883	589	43.9627	Yes	No	Yes	No
CG8507	NM_141693	189.344	218.099	1.15187	520	50.7687	Yes	Yes	Yes	No
CG13082	NM_136140	0	0	NA	0	NA	No	No	No	No
CG8501	NM_136927	0	0	NA	0	NA	No	No	No	No
CG13084	NM_136127	1118.97	7285.03	6.51049	6780	44.2541	Yes	Yes	Yes	No
CG15878	NM_139442	0	0	NA	2	62.6586	No	No	No	No
CG13086	NM_001273639	0	0	NA	0	NA	No	No	No	No
CG30338	NM_165685	8.6793	13.9557	1.60793	53	59.0055	No	Yes	No	No
CG30339	NM_165687	0	0	NA	0	NA	No	No	No	No
Patj	NM_057994	25.6467	15.1076	0.589068	207	50.4255	Yes	Yes	Yes	No
PIG-V	NM_001299580	43.7325	7.89357	0.180496	255	46.6239	Yes	Yes	Yes	No
PIG-U	NM_135394	50.2262	53.721	1.06958	363	81.3737	Yes	Yes	Yes	No
CG30334	NM_165903	5.44038	3.32415	0.611014	30	52.2694	No	No	No	No
mRpL43	NM_079104	39.508	25.8642	0.654658	332	30.8582	Yes	Yes	Yes	No
mRpL42	NM_078949	82.2975	52.6238	0.639433	271	54.1193	Yes	Yes	Yes	No
mRpL41	NM_137178	32.8248	61.9389	1.88696	186	52.621	Yes	Yes	Yes	No
mRpL40	NM_079594	45.5302	28.4519	0.624901	380	52.702	Yes	Yes	Yes	No
mRpL47	NM_176433	52.6197	70.7032	1.34367	221	55.4846	Yes	Yes	Yes	No
mRpL46	NM_139404	63.6561	44.6976	0.702173	336	62.5156	Yes	Yes	Yes	No
mRpL45	NM_142815	54.2763	77.5896	1.42953	231	65.5452	Yes	Yes	Yes	No
mRpL44	NM_141284	49.9786	16.1816	0.323771	370	50.7113	Yes	Yes	Yes	No
mRpL49	NM_001298241	82.5124	24.4325	0.296107	428	38.454	Yes	Yes	Yes	No
mRpL48	NM_134769	52.6707	65.5145	1.24385	166	48.0194	Yes	Yes	Yes	No
LpR2	NM_001104456	51.521	11.8144	0.229312	329	62.5059	Yes	Yes	Yes	No
PIG-C	NM_139547	17.6404	37.9592	2.15183	44	98.7961	Yes	Yes	No	No
LpR1	NM_001276044	10.1906	1.9788	0.194178	103	31.4427	Yes	No	Yes	No
Ca-beta	NM_001259049	0	0	NA	0	NA	No	No	No	No
CG1104	NM_141433	6.43932	4.95947	0.770186	59	49.969	Yes	Yes	No	No
CG1105	NM_141431	20.3087	6.07972	0.299366	212	40.1626	Yes	No	Yes	No
CG1103	NM_141199	63.8461	54.9699	0.860974	133	56.0345	Yes	Yes	Yes	No
alphaTub85E	NM_079573	1.24403	3.50825	2.82006	0	NA	No	No	No	No
MICAL-like	NM_140364	49.0023	31.3426	0.639615	178	69.6586	Yes	Yes	Yes	No
CG1109	NM_169091	50.7255	21.6125	0.426069	143	61.8312	Yes	Yes	Yes	No
CG4161	NM_001299026	0	0	NA	0	NA	No	No	No	No
CG4164	NM_134681	54.2962	41.5633	0.765492	0	NA	Yes	Yes	No	No
CG4168	NM_001299024	0	0	NA	0	NA	No	No	No	No
C15	NM_057525	0	0	NA	0	NA	No	No	No	No
CG14230	NM_134505	49.1588	4.04081	0.0821992	19	61.8517	Yes	No	No	No
CG14234	NM_134507	0	0	NA	0	NA	No	No	No	No
CG44314	NM_001299401	0	0	NA	0	NA	No	No	No	No
CG43329	NM_001259957	0	0	NA	0	NA	No	No	No	No
CG34039	NM_001038923	26.8365	21.8865	0.815548	75	41.2035	Yes	Yes	No	No
CG43638	NM_001274812	0	0	NA	0	NA	No	No	No	No
Map60	NM_057604	140.039	73.4446	0.524457	728	48.9597	Yes	Yes	Yes	No
Taf6	NM_079437	37.4404	13.8418	0.369704	137	52.224	Yes	Yes	Yes	No
CG43321	NM_001258996	0	0	NA	0	NA	No	No	No	No
CG43320	NM_143324	10.3037	6.46136	0.627093	47	43.5902	Yes	No	No	No
CG34031	NM_001259965	1.22364	0	0	9	33.0928	No	No	No	No
CG43630	NM_001260150	0	0	NA	4	43.4491	No	No	No	No
Ada2b	NM_001275438	99.873	19.8375	0.198627	680	62.7563	Yes	Yes	Yes	No
CG34034	NM_001170207	0	0	NA	0	NA	No	No	No	No
mRpL4	NM_080200	57.3941	54.9077	0.956678	340	56.7419	Yes	Yes	Yes	No
mRpL2	NM_079298	33.2239	64.1779	1.93168	107	66.5873	Yes	Yes	Yes	No
mRpL3	NM_078611	67.1706	51.577	0.767852	131	52.2141	Yes	Yes	Yes	No
mRpL1	NM_079551	76.1127	26.3983	0.346832	289	65.6613	Yes	Yes	Yes	No
lox2	NM_079082	0	0	NA	0	NA	No	No	No	No
defl	NM_140095	13.888	7.5215	0.541581	72	47.6743	Yes	Yes	No	No
CG17258	NM_134898	0	0	NA	0	NA	No	No	No	No
CG44174	NM_001275799	0	0	NA	0	NA	No	No	No	No
CG32150	NM_168635	0	0	NA	0	NA	No	No	No	No
RPA3	NM_001298202	175.198	471.459	2.69101	440	109.296	Yes	Yes	Yes	No
RPA2	NM_136233	158.43	468.613	2.95786	365	89.8578	Yes	Yes	Yes	No
CG6204	NM_142972	4.29944	1.07079	0.249055	77	23.4254	Yes	No	No	No
Slimp	NM_170125	11.7466	9.32491	0.793837	85	41.783	Yes	Yes	No	No
COQ7	NM_143710	83.0035	130.841	1.57633	354	63.5776	Yes	Yes	Yes	No
SrpRbeta	NM_001274667	60.1131	59.922	0.99682	142	48.8882	Yes	Yes	Yes	No
tara	NM_080255	1.79627	1.2664	0.705016	15	31.6379	No	No	No	No
Cdc42	NM_001258833	136.465	40.1015	0.293859	1182	49.7323	Yes	Yes	Yes	No
CG46192	NM_001316662	0	0	NA	0	NA	No	No	No	No
CG14509	NM_001276131	0.0845705	0	0	0	NA	No	No	No	No
CG14057	NM_140698	50.6591	49.9564	0.98613	121	37.4063	Yes	Yes	Yes	No
CstF-50	NM_143626	23.0527	22.3383	0.969009	180	46.7178	Yes	Yes	Yes	No
CG14507	NM_001104494	0	1.0636	NA	0	NA	No	No	No	No
CG14506	NM_001276138	0	0	NA	0	NA	No	No	No	No
CG14053	NM_001272251	1.35431	0	0	9	50.3057	No	No	No	No
CG14052	NM_001272252	0	0	NA	0	NA	No	No	No	No
Dhc98D	NM_079817	0.286587	0.187616	0.654658	2	69.7312	No	No	No	No
CG14050	NM_001258558	1.53374	0	0	4	60.7471	No	No	No	No
CHMP2B	NM_139690	27.6686	27.1011	0.979488	108	82.4971	Yes	Yes	Yes	No
Mon1	NM_135024	30.1902	8.16005	0.270288	232	38.9334	Yes	Yes	Yes	No
CG10616	NM_001300119	46.4009	21.9419	0.472877	258	49.9677	Yes	Yes	Yes	No
Trip1	NM_078754	226.491	101.037	0.446094	1897	62.5945	Yes	Yes	Yes	No
CG18428	NM_001260349	16.4773	67.9579	4.12434	158	65.8537	No	Yes	Yes	No
CG8668	NM_001298811	74.2923	4.67288	0.0628985	366	49.5047	Yes	No	Yes	No
CG18420	NM_205993	0	0	NA	0	NA	No	No	No	No
Mlh1	NM_057674	25.4563	8.50007	0.333908	105	68.4428	Yes	Yes	Yes	No
mxc	NM_132320	50.9316	0	0	205	49.5525	Yes	No	Yes	No
Hexo2	NM_080342	17.8501	18.8045	1.05347	63	77.6853	Yes	Yes	No	No
Hexo1	NM_168076	16.1563	13.8418	0.856748	44	75.4722	Yes	Yes	No	No
CG5958	NM_135275	39.0343	144.059	3.69057	385	76.7824	Yes	Yes	Yes	No
CG5955	NM_140973	0	0	NA	0	NA	No	No	No	No
CG5484	NM_143241	52.8097	104.279	1.97462	247	66.9914	Yes	Yes	Yes	No
CG5482	NM_001299651	68.6175	57.3081	0.835182	515	51.0024	Yes	Yes	Yes	No
CG5953	NM_001273574	16.6395	0.277282	0.016664	42	56.8627	Yes	No	No	No
CG32206	NM_168794	0.0333253	0	0	0	NA	No	No	No	No
CG32204	NM_001104171	0	0	NA	0	NA	No	No	No	No
Cpr67B	NM_140049	0	0	NA	0	NA	No	No	No	No
Su(dx)	NM_164448	66.1559	13.0307	0.196969	680	37.9439	Yes	Yes	Yes	No
por	NM_057542	16.3646	2.61167	0.159593	156	66.2843	Yes	No	Yes	No
Cpr78Cb	NM_001275215	0	0	NA	1	70.9457	No	No	No	No
Cpr78Cc	NM_141043	0	0	NA	0	NA	No	No	No	No
Cdep	NM_001104215	0.165585	0	0	0	NA	No	No	No	No
Cpr78Ca	NM_141041	0	0	NA	0	NA	No	No	No	No
Mdh2	NM_142439	231.589	409.327	1.76747	1031	127.967	Yes	Yes	Yes	No
Mdh1	NM_001298874	447.8	450.632	1.00632	2963	77.0222	Yes	Yes	Yes	No
CdGAPr	NM_001273671	25.3708	3.0158	0.118869	310	34.5813	Yes	Yes	Yes	No
CG11626	NM_001104365	0	0	NA	0	NA	No	No	No	No
Shark	NM_080004	39.9707	1.44066	0.036043	382	29.4567	Yes	No	Yes	No
Pka-C2	NM_170518	0.490259	0	0	2	130.518	No	No	No	No
Pka-C3	NM_079373	1.79798	1.96177	1.0911	7	80.1537	No	No	No	No
Usp32	NM_001275145	26.7694	4.47306	0.167096	271	39.4187	Yes	Yes	Yes	No
Pka-C1	NM_205950	51.6298	38.8698	0.752857	258	72.7981	Yes	Yes	Yes	No
CG11629	NM_136281	0	0	NA	0	NA	No	No	No	No
Myc	NM_001272275	104.537	1.62573	0.0155518	549	39.7699	Yes	No	Yes	No
Myb	NM_206731	69.9607	28.149	0.402354	204	77.8005	Yes	Yes	Yes	No
CG12448	NM_165140	0	0	NA	0	NA	No	No	No	No
CG3386	NM_001274288	9.44064	5.58229	0.591304	3	75.2783	No	No	No	No
CG32061	NM_168409	0	0	NA	0	NA	No	No	No	No
CG32066	NM_168416	62.2689	40.6768	0.653244	83	59.2586	Yes	Yes	No	No
FLASH	NM_206106	22.4777	0	0	172	32.502	Yes	No	Yes	No
CG7080	NM_142762	0	0	NA	0	NA	No	No	No	No
CG7084	NM_001300531	0	0	NA	0	NA	No	No	No	No
CG15674	NM_137749	0.193173	0.885234	4.58261	0	NA	No	No	No	No
Hsp60B	NM_080186	0	0	NA	0	NA	No	No	No	No
CG18284	NM_001298878	0	0	NA	0	NA	No	No	No	No
CG15673	NM_137747	10.789	19.1712	1.77693	72	74.6918	No	Yes	No	No
l(3)07882	NM_001316506	29.7001	1.13609	0.0382521	68	46.2204	Yes	No	No	No
poe	NM_057638	10.0889	15.4708	1.53345	47	86.6	Yes	Yes	No	No
DIP1	NM_001169343	19.227	10.4893	0.545548	113	51.1862	Yes	Yes	Yes	No
DIP2	NM_138175	33.1773	1.40576	0.0423712	150	46.5472	Yes	No	Yes	No
CG11560	NM_001316463	25.3361	1.30456	0.0514899	101	33.315	Yes	No	Yes	No
CG11562	NM_134672	58.4088	19.1189	0.327329	238	54.2825	Yes	No	Yes	No
CG11563	NM_143627	53.7491	38.7344	0.720652	285	47.9948	Yes	Yes	Yes	No
HDAC6	NM_001272640	45.9116	9.63764	0.209917	131	60.859	Yes	Yes	Yes	No
Gp93	NM_143344	126.446	321.754	2.54459	310	94.2191	Yes	Yes	Yes	No
CG13708	NM_139676	0	0	NA	0	NA	No	No	No	No
CG13707	NM_001259704	0	0	NA	6	69.6835	No	No	No	No
CG13704	NM_139682	0	0	NA	1	14.0535	No	No	No	No
CG13705	NM_139681	0	0	NA	0	NA	No	No	No	No
E(var)3-9	NM_141595	98.0301	5.64447	0.0575789	411	50.4236	Yes	No	Yes	No
CG13700	NM_001275084	0	0	NA	0	NA	No	No	No	No
modSP	NM_080515	0.203163	0	0	1	34.4452	No	No	No	No
CG15019	NM_001104032	88.1322	1.45803	0.0165437	473	23.0819	Yes	No	Yes	No
alphaTub67C	NM_079285	406.285	695.264	1.71127	1071	81.2869	Yes	Yes	Yes	No
CG15011	NM_139622	18.009	4.84105	0.268812	153	43.7304	Yes	Yes	Yes	No
CG15012	NM_001169876	66.0037	163.082	2.47081	319	62.3153	Yes	Yes	Yes	No
CG15014	NM_139635	58.2342	3.08157	0.0529169	386	35.67	Yes	No	Yes	No
Zyx	NM_166819	37.0733	22.3631	0.603211	317	50.865	Yes	Yes	Yes	No
CG9667	NM_141511	24.2659	20.0162	0.824869	54	41.2688	Yes	Yes	No	No
CG9664	NM_164533	0.0698895	0	0	0	NA	No	No	No	No
CG6136	NM_142203	11.9038	9.98812	0.839069	59	47.0891	No	No	No	No
CG9662	NM_001273068	69.0438	202.382	2.93122	476	97.5497	Yes	Yes	Yes	No
CG9669	NM_140668	99.7887	134.139	1.34423	968	61.2101	Yes	Yes	Yes	No
CG3746	NM_001299806	0	0	NA	1	2.81459	No	No	No	No
CG3744	NM_001276006	43.4782	8.57148	0.197145	249	45.7667	Yes	Yes	Yes	No
Cyp318a1	NM_167318	0	0	NA	0	NA	No	No	No	No
CG3748	NM_205941	0	0	NA	0	NA	No	No	No	No
CG7627	NM_001259014	97.2191	86.4075	0.888792	334	69.2979	Yes	Yes	Yes	No
nkd	NM_080049	0.272714	0	0	0	NA	No	No	No	No
Sec10	NM_142961	19.8878	41.3268	2.078	108	70.9696	Yes	Yes	Yes	No
Sec13	NM_001300551	112.706	173.652	1.54075	291	83.8803	Yes	Yes	Yes	No
Sec15	NM_142685	36.7517	13.4228	0.36523	286	41.013	Yes	Yes	Yes	No
Sec16	NM_001298230	30.0997	39.6051	1.3158	265	54.1633	Yes	Yes	Yes	No
Leash	NM_141780	14.9646	1.50718	0.100717	120	47.0963	Yes	No	Yes	No
CG5989	NM_139985	33.4439	1.80838	0.054072	311	48.3896	Yes	No	Yes	No
CG33337	NM_206546	0	0	NA	0	NA	No	No	No	No
Np	NM_136593	0.12133	0	0	0	NA	No	No	No	No
Tsp33B	NM_078828	0	0	NA	0	NA	No	No	No	No
Ir21a	NM_001103573	0.0501828	0	0	0	NA	No	No	No	No
Arc42	NM_142583	77.326	92.7374	1.1993	323	78.3236	Yes	Yes	Yes	No
CG9590	NM_142231	26.3179	23.0945	0.87752	147	47.2938	Yes	Yes	Yes	No
CG9593	NM_142236	0	0	NA	0	NA	No	No	No	No
CG9592	NM_140449	0	0	NA	0	NA	No	No	No	No
hep	NM_001272572	31.1661	5.18627	0.166407	80	55.8833	Yes	No	No	No
CG6689	NM_141794	19.5074	2.22692	0.114157	116	61.2627	Yes	No	Yes	No
her	NM_001273577	18.3878	0	0	47	45.2832	Yes	No	No	No
CG9596	NM_001298750	25.1711	0.887301	0.0352508	140	42.9686	Yes	No	Yes	No
POLDIP2	NM_169054	28.6547	4.11783	0.143705	183	38.2748	Yes	No	Yes	No
CG6686	NM_164978	14.2175	2.03604	0.143206	117	53.8822	No	No	Yes	No
CG6683	NM_139975	24.0117	20.9592	0.872877	161	51.3085	Yes	Yes	Yes	No
CG11158	NM_132684	3.53634	2.31509	0.654658	16	89.0097	No	No	No	No
kdn	NM_167072	62.2426	3.75307	0.0602974	483	30.2329	Yes	No	Yes	No
hec	NM_132615	1.23433	1.61613	1.30932	9	73.2799	No	No	No	No
l(2)gl	NM_001258875	96.0903	13.1074	0.136408	737	56.8984	Yes	Yes	Yes	No
e(y)2b	NM_001300275	1.04541	0	0	2	89.8852	No	No	No	No
CG17732	NM_001202206	0	0	NA	0	NA	No	No	No	No
HHEX	NM_142681	0	0	NA	0	NA	No	No	No	No
CG17737	NM_139535	530.142	1480.62	2.79288	2643	66.6191	Yes	Yes	Yes	No
CG17883	NM_001042984	76.9152	6.42155	0.0834888	23	37.3259	Yes	No	No	No
CG17734	NM_001260114	16.9849	25.2439	1.48625	1762	54.473	No	No	Yes	No
mRpS7	NM_001273410	118.665	50.7165	0.427393	599	47.9613	Yes	Yes	Yes	No
mRpS6	NM_001259694	43.8885	62.2181	1.41764	227	52.2902	Yes	Yes	Yes	No
Rpp30	NM_001272879	11.2022	4.72824	0.422082	103	42.932	No	No	Yes	No
CG17738	NM_141915	0	0	NA	0	NA	No	No	No	No
mRpS2	NM_078749	48.4254	62.7483	1.29577	377	73.2271	Yes	Yes	Yes	No
CG12547	NM_001273775	51.9727	5.69007	0.109482	204	43.3624	Yes	Yes	Yes	No
CG12546	NM_141148	0	0	NA	0	NA	No	No	No	No
CG2162	NM_001169861	86.0365	11.1725	0.129858	393	34.4421	Yes	Yes	Yes	No
CG33137	NM_176163	0	0	NA	0	NA	No	No	No	No
CG12541	NM_132150	0	0	NA	0	NA	No	No	No	No
Map205	NM_001276225	36.6762	342.75	9.34529	524	72.6347	Yes	Yes	Yes	No
CG33301	NM_001298864	0	0	NA	0	NA	No	No	No	No
RpS26	NM_001299113	2674.46	81.1655	0.0303484	14173	49.6262	Yes	Yes	Yes	No
RpS27	NM_143102	2786.03	622.929	0.22359	18465	56.3689	Yes	Yes	Yes	No
rush	NM_001297855	41.4217	10.1237	0.244406	732	53.6028	Yes	No	Yes	No
RpS25	NM_079591	3523.39	324.427	0.0920779	14415	52.3529	Yes	Yes	Yes	No
RpS23	NM_137095	2905.24	417.868	0.143832	8290	48.7773	Yes	Yes	Yes	No
l(1)G0020	NM_001298096	20.792	5.39329	0.259393	149	44.4666	Yes	Yes	Yes	No
RpS21	NM_001273041	1149.19	155.223	0.135071	5819	64.5659	Yes	Yes	Yes	No
RpS29	NM_169311	2549.75	282.69	0.110869	12730	68.1385	Yes	Yes	Yes	No
mdy	NM_165195	10.3418	0.345929	0.0334497	123	18.8123	Yes	No	Yes	No
CG1486	NM_167743	26.0806	1.81775	0.0696974	265	38.0105	Yes	No	Yes	No
CG16935	NM_137070	45.6793	35.074	0.76783	396	36.6363	Yes	Yes	Yes	No
Dcr-1	NM_079729	16.8223	9.01935	0.536155	98	69.492	Yes	Yes	No	No
TyrRII	NM_001300451	0	0	NA	0	NA	No	No	No	No
Ser6	NM_078702	0	0	NA	0	NA	No	No	No	No
Ser7	NM_132354	0	0	NA	1	35.1021	No	No	No	No
ac	NM_057476	0	0	NA	0	NA	No	No	No	No
ab	NM_057214	0	0	NA	0	NA	No	No	No	No
Mpcp	NM_001259828	237.719	202.687	0.852632	2740	75.165	Yes	Yes	Yes	No
uif	NM_001258995	0	0	NA	0	NA	No	No	No	No
al	NM_164382	0	0	NA	0	NA	No	No	No	No
Ser8	NM_137030	0	0	NA	4	35.7172	No	No	No	No
CG7759	NM_165831	0.25743	0	0	2	95.2679	No	No	No	No
ap	NM_165445	0.091473	0	0	2	33.1282	No	No	No	No
Hop	NM_058006	212.089	557.271	2.62754	1325	68.4028	Yes	Yes	Yes	No
Cpr11B	NM_132579	0	0	NA	0	NA	No	No	No	No
CG9849	NM_137896	29.8936	2.10755	0.0705016	216	25.2221	Yes	No	Yes	No
Swim	NM_137808	3.794	14.1836	3.73844	78	61.7371	No	Yes	No	No
Not3	NM_001273783	96.2185	38.5414	0.400561	593	56.2736	Yes	Yes	Yes	No
CG5177	NM_001273262	0	2.18985	NA	0	NA	No	No	No	No
Blimp-1	NM_001300016	0.0349251	0	0	0	NA	No	No	No	No
Strn-Mlck	NM_001274090	0.105691	0.0461276	0.436439	1	16.417	No	No	No	No
CG5174	NM_001259478	86.7302	137.682	1.58748	808	65.5272	Yes	Yes	Yes	No
CG5172	NM_132976	0	0	NA	0	NA	No	No	No	No
CG5171	NM_001298780	0.805721	4.43076	5.49913	1	67.0324	No	No	No	No
Rrp46	NM_141744	18.8895	20.1106	1.06465	131	38.7638	Yes	Yes	Yes	No
CG45781	NM_001015335	3.11592	0.356976	0.114565	7	44.061	No	No	No	No
Trs20	NM_140584	23.872	10.7855	0.451806	296	34.2065	No	No	Yes	No
sowah	NM_001144471	16.5473	7.45867	0.450748	71	41.1749	Yes	Yes	No	No
CG1667	NM_136681	56.5009	2.32216	0.0410996	345	33.0341	Yes	No	Yes	No
CG1665	NM_136679	32.2195	42.1856	1.30932	298	67.8296	Yes	Yes	Yes	No
CG1663	NM_136677	29.8166	1.0235	0.0343266	181	43.9313	Yes	No	Yes	No
CG1662	NM_001298280	44.6622	0	0	228	31.5134	Yes	No	Yes	No
Hen1	NM_136888	12.7055	2.02519	0.159395	75	45.1825	Yes	No	No	No
Not10	NM_001316562	22.564	2.76147	0.122384	114	52.3591	Yes	No	Yes	No
CG17207	NM_206480	0	0	NA	0	NA	No	No	No	No
Arf79F	NM_057607	303.155	800.869	2.64178	958	62.6334	Yes	Yes	Yes	No
Mpc1	NM_001275791	55.3912	83.225	1.50249	420	49.5209	Yes	Yes	Yes	No
CG34417	NM_001103426	0.643321	2.75665	4.28503	0	NA	No	Yes	No	No
upd2	NM_133049	0	0	NA	0	NA	No	No	No	No
TpnC73F	NM_001300162	0	0	NA	0	NA	No	No	No	No
a5	NM_057650	0	0	NA	0	NA	No	No	No	No
Esyt2	NM_170652	0.207252	0.474878	2.2913	22	70.4604	No	No	No	No
a6	NM_001272212	21.8233	0	0	234	40.4345	Yes	No	Yes	No
CG7943	NM_170462	54.7951	4.2051	0.0767422	307	58.4326	Yes	No	Yes	No
SNRPG	NM_132911	417.885	1017.34	2.43451	1614	63.1575	Yes	Yes	Yes	No
CG42666	NM_001201600	17.4699	3.56944	0.20432	137	48.7528	Yes	No	Yes	No
CG43400	NM_001259016	0	0	NA	0	NA	No	No	No	No
CG43401	NM_001298633	0	0	NA	0	NA	No	No	No	No
CG43402	NM_001298634	0	0	NA	0	NA	No	No	No	No
Txl	NM_079214	165.056	171.588	1.03957	982	40.3035	Yes	Yes	Yes	No
CG34204	NM_001103931	0	0	NA	0	NA	No	No	No	No
CG34205	NM_001103937	0	0	NA	0	NA	No	No	No	No
CG34206	NM_001103938	0	0	NA	7	50.4499	No	No	No	No
mRpS29	NM_079087	64.5707	70.6933	1.09482	244	58.0585	Yes	Yes	Yes	No
CG34208	NM_001103943	0	0	NA	1	60.87	No	No	No	No
cpa	NM_137695	81.6061	87.1656	1.06813	760	65.3695	Yes	Yes	Yes	No
cpb	NM_001272948	68.1749	192.707	2.82665	206	93.9448	Yes	Yes	Yes	No
mRpS25	NM_078598	66.5859	101.712	1.52754	353	67.3122	Yes	Yes	Yes	No
CG13148	NM_136967	1.1703	2.68152	2.2913	10	54.4811	No	No	No	No
mRpS23	NM_165065	70.8142	42.7568	0.603789	519	44.0306	Yes	Yes	Yes	No
CG8417	NM_141683	8.94046	2.49821	0.279427	64	30.6167	Yes	No	No	No
mRpS21	NM_001275606	85.4546	125.207	1.46519	610	46.9889	Yes	Yes	Yes	No
cpx	NM_001275319	0	0	NA	2	116.921	No	No	No	No
Cks30A	NM_057599	129.379	325.766	2.51791	386	120.039	Yes	Yes	Yes	No
prominin-like	NM_001259658	30.8038	20.9993	0.68171	204	64.201	Yes	Yes	Yes	No
Arr1	NM_001259144	0	0	NA	0	NA	No	No	No	No
scf	NM_058044	21.8367	32.1434	1.47199	82	49.3239	Yes	Yes	No	No
sca	NM_165951	0	0	NA	0	NA	No	No	No	No
Rbbp5	NM_140952	15.1562	3.21178	0.211912	116	43.2353	Yes	No	Yes	No
scb	NM_079026	6.48798	30.769	4.74246	67	63.6821	Yes	Yes	No	No
Fib	NM_079093	96.6178	4.63018	0.0479227	422	29.5179	Yes	No	Yes	No
Fic	NM_135182	47.8809	1.19683	0.024996	284	35.0804	Yes	No	Yes	No
deltaTry	NM_078970	0	0	NA	0	NA	No	No	No	No
GluClalpha	NM_001275811	0	0	NA	0	NA	No	No	No	No
CG5569	NM_137996	67.3755	54.7962	0.813295	558	60.5076	Yes	Yes	Yes	No
Fie	NM_133165	0	0	NA	0	NA	No	No	No	No
scu	NM_001258800	262.713	354.8	1.35052	593	113.946	Yes	Yes	Yes	No
CG11815	NM_139428	0	0	NA	0	NA	No	No	No	No
mnb	NM_167581	65.3849	4.25918	0.0651401	81	39.0801	Yes	Yes	No	No
CG5567	NM_140758	58.3099	0.60455	0.0103679	541	33.5892	Yes	No	Yes	No
mnd	NM_079350	49.4181	13.3677	0.270501	227	42.9032	Yes	Yes	Yes	No
CG11811	NM_140151	80.7095	9.6181	0.119169	541	55.2059	Yes	No	Yes	No
Fim	NM_078661	84.3524	28.9155	0.342793	459	40.876	Yes	Yes	Yes	No
CG8712	NM_165587	41.33	7.57596	0.183304	192	50.6306	Yes	No	Yes	No
CG8713	NM_136505	4.70065	0	0	19	65.4586	No	No	No	No
tx	NM_001300614	0	0	NA	0	NA	No	No	No	No
Inos	NM_058057	42.7259	18.6802	0.43721	610	28.6864	Yes	Yes	Yes	No
tw	NM_001272173	0	0	NA	1	54.9565	No	No	No	No
Eaf	NM_136429	70.0564	3.11312	0.0444374	269	41.5308	Yes	No	Yes	No
tn	NM_001144235	0.0276206	0	0	1	128.686	No	No	No	No
to	NM_001300596	0	0	NA	0	NA	No	No	No	No
CG43373	NM_001104152	0	0	NA	0	NA	No	No	No	No
tj	NM_001273653	0.615096	1.05703	1.71848	8	46.8201	No	No	No	No
nord	NM_138056	0.0725807	0	0	0	NA	No	No	No	No
dsh	NM_078563	62.543	9.69968	0.155088	282	45.6878	Yes	Yes	Yes	No
CG8414	NM_137240	43.9095	0	0	369	50.8389	Yes	No	Yes	No
CG31493	NM_169174	0	0	NA	0	NA	No	No	No	No
CG13551	NM_166597	434.049	907.152	2.08997	759	102.224	Yes	Yes	Yes	No
CG31496	NM_169182	0	0	NA	0	NA	No	No	No	No
CG6912	NM_142162	0.894273	0.455344	0.509178	6	72.663	No	No	No	No
CG31495	NM_169559	17.08	3.50466	0.205191	68	35.977	Yes	No	No	No
fu12	NM_001169441	44.6617	3.72122	0.0833201	284	55.3534	Yes	No	Yes	No
CG13558	NM_137956	0	0	NA	0	NA	No	No	No	No
dsd	NM_001276084	26.2319	1.59893	0.0609536	250	54.5494	Yes	No	Yes	No
Irc	NM_001275724	5.59936	16.4557	2.93884	53	63.196	Yes	Yes	No	No
ro	NM_170294	0.124031	0	0	0	NA	No	No	No	No
RpI1	NM_079019	19.1998	0.701075	0.0365148	131	33.9784	Yes	No	Yes	No
Neos	NM_079231	52.7488	24.0658	0.456233	135	45.6296	Yes	Yes	Yes	No
CG33926	NM_001300075	0.876079	4.01473	4.58261	8	82.2843	No	No	No	No
CG33927	NM_001031976	0	0	NA	0	NA	No	No	No	No
CG33920	NM_001032043	0	0	NA	0	NA	No	No	No	No
CG33922	NM_001032046	0	0	NA	0	NA	No	No	No	No
CG42758	NM_001202177	0	0	NA	0	NA	No	No	No	No
pbl	NM_079241	50.965	0.146704	0.00287852	569	41.7667	Yes	No	Yes	No
CG33928	NM_001032105	0	0	NA	0	NA	No	No	No	No
CG42752	NM_001201910	0	0	NA	0	NA	No	No	No	No
CG42751	NM_001201863	0	0	NA	2	162.997	No	No	No	No
RagC-D	NM_136517	48.8406	34.9875	0.716361	104	75.1368	Yes	Yes	Yes	No
Apoltp	NM_205948	0	0.0880313	NA	0	NA	No	No	No	No
Smr	NM_001272562	56.3475	12.276	0.217862	140	53.8336	Yes	Yes	Yes	No
lin-52	NM_001297979	98.8771	44.3703	0.448742	549	43.8103	Yes	Yes	Yes	No
Dsk	NM_080106	0.33086	0	0	0	NA	No	No	No	No
CG31278	NM_001300344	4.8094	0	0	60	33.5684	No	No	No	No
CG31279	NM_001275702	1.93173	1.77047	0.916521	18	87.9828	No	No	No	No
CG31275	NM_169732	0	0	NA	0	NA	No	No	No	No
CG31272	NM_141756	0	0	NA	0	NA	No	No	No	No
Sodh-2	NM_079587	14.0902	25.9383	1.84088	68	52.5911	Yes	Yes	No	No
Sodh-1	NM_058000	0.120429	0	0	1	38.2405	No	No	No	No
TfIIA-S	NM_079743	102.828	71.5243	0.695574	670	48.3437	Yes	Yes	Yes	No
CG4968	NM_135531	144.267	128.058	0.887646	590	45.4065	Yes	Yes	Yes	No
CG4218	NM_001299007	0	0	NA	0	NA	No	No	No	No
CG42693	NM_001202399	0	0	NA	0	NA	No	No	No	No
CG4962	NM_140608	0	0	NA	6	75.3947	No	No	No	No
CG4960	NM_001300604	0	0	NA	0	NA	No	No	No	No
CG4210	NM_142173	23.833	37.2059	1.56111	65	78.5865	Yes	Yes	No	No
CG4213	NM_134676	0	0	NA	0	NA	No	No	No	No
slmb	NM_001275873	99.0803	54.2632	0.547669	411	82.8181	Yes	Yes	Yes	No
SmF	NM_078984	182.879	307.376	1.68077	918	46.3861	Yes	Yes	Yes	No
CG43736	NM_001298043	39.2788	4.07811	0.103825	296	50.1629	Yes	Yes	Yes	No
SmB	NM_001201851	135.713	43.5342	0.320782	508	35.2337	Yes	Yes	Yes	No
CCDC53	NM_135334	25.0876	5.9261	0.236217	106	37.2121	Yes	No	Yes	No
Hira	NM_132173	33.654	24.3219	0.722705	72	62.1508	Yes	Yes	No	No
CG14265	NM_130694	0	0	NA	0	NA	No	No	No	No
CG14260	NM_143294	0	0	NA	0	NA	No	No	No	No
CG14262	NM_143293	0.139936	0	0	0	NA	No	No	No	No
Wwox	NM_135327	13.8109	9.17943	0.664653	64	50.6315	Yes	Yes	No	No
Men-b	NM_143702	53.0989	7.90037	0.148786	114	46.7453	Yes	Yes	Yes	No
Cont	NM_141204	33.2808	37.1949	1.11761	195	56.2309	Yes	Yes	Yes	No
CG14907	NM_142317	9.68636	3.48147	0.35942	67	47.7433	No	No	No	No
Adat1	NM_135832	3.17859	2.51141	0.790104	15	51.5491	No	No	No	No
Adk3	NM_001300350	16.7665	27.5085	1.64069	65	45.7172	Yes	Yes	No	No
Adk1	NM_168493	7.19206	0	0	38	56.2287	No	No	No	No
pico	NM_167686	85.9624	14.5555	0.169324	985	46.6448	Yes	Yes	Yes	No
CG15249	NM_001103459	0.24203	3.32738	13.7478	12	91.673	No	No	No	No
Pde8	NM_001169803	0.692411	0	0	3	27.8604	No	No	No	No
CG7755	NM_137266	0	0	NA	0	NA	No	No	No	No
Pde6	NM_142112	0.112854	0	0	1	25.4797	No	No	No	No
CG15247	NM_132356	4.39933	2.24004	0.509178	42	42.3008	No	No	No	No
alpha-Est10	NM_079533	22.0376	1.3787	0.0625612	142	30.4115	Yes	No	Yes	No
vib	NM_001275797	84.7618	93.0459	1.09773	188	83.0804	Yes	Yes	Yes	No
vig	NM_165102	16.523	2.80438	0.169726	106	39.8581	Yes	No	Yes	No
vih	NM_140325	174.216	718.759	4.12569	796	92.4431	Yes	Yes	Yes	No
CG12730	NM_001297967	2.50687	1.436	0.572826	32	57.2968	No	No	No	No
vir	NM_080161	8.81989	1.86068	0.210964	72	42.4646	Yes	Yes	No	No
vis	NM_176157	0.40788	0	0	0	NA	No	No	No	No
Df31	NM_001032217	1186.54	3820.29	3.21969	2886	97.6458	Yes	Yes	Yes	No
Gr10b	NM_078566	0	0	NA	0	NA	No	No	No	No
corto	NM_001259993	80.0123	8.53536	0.106676	400	49.5076	Yes	Yes	Yes	No
CG10399	NM_001298767	17.1358	23.4962	1.37117	97	54.8327	Yes	Yes	No	No
Kap3	NM_001103480	43.5054	2.65824	0.0611014	416	42.7268	Yes	No	Yes	No
CG10395	NM_136323	74.5482	11.4591	0.153714	454	39.2613	Yes	No	Yes	No
l(2)41Ab	NM_001110887	1.32798	0	0	3	70.035	No	No	No	No
CG2118	NM_001260462	52.0828	57.6496	1.10688	346	109.511	Yes	Yes	Yes	No
rhea	NM_001274657	14.4679	50.1297	3.4649	164	42.9006	Yes	Yes	Yes	No
BRWD3	NM_170139	36.2975	4.63001	0.127557	396	54.6558	Yes	Yes	Yes	No
CG7432	NM_142568	0	0	NA	0	NA	No	No	No	No
CG2113	NM_139500	0	0	NA	0	NA	No	No	No	No
CG2116	NM_132216	34.6079	2.61061	0.0754338	271	37.7691	Yes	No	Yes	No
CG12766	NM_139582	0	0	NA	0	NA	No	No	No	No
cact	NM_057595	224.175	74.5723	0.332652	1365	53.5014	Yes	Yes	Yes	No
CG3402	NM_138201	47.5205	30.098	0.633368	188	54.4437	Yes	No	Yes	No
CG5361	NM_141721	0	0	NA	0	NA	No	No	No	No
CG5367	NM_135543	0.643243	0.589546	0.916521	0	NA	No	No	No	No
CG9121	NM_001273152	0.0833802	0	0	1	39.5476	No	No	No	No
CG9123	NM_132790	2.97378	0	0	43	34.7594	No	No	No	No
CG9436	NM_136391	45.3524	43.1107	0.950571	217	62.4892	Yes	Yes	Yes	No
CG9125	NM_206769	37.7364	26.4421	0.700704	268	116.1	Yes	Yes	Yes	No
Acph-1	NM_080178	71.9713	116.088	1.61298	673	89.4903	Yes	Yes	Yes	No
CG10669	NM_001170257	10.7135	1.24293	0.116015	28	29.7578	Yes	No	No	No
CG2371	NM_167294	42.2882	20.5069	0.484932	321	45.4721	Yes	Yes	Yes	No
klu	NM_001300095	0	0	NA	0	NA	No	No	No	No
RpL10Ab	NM_168480	1571.09	183.9	0.117052	6238	48.9221	Yes	Yes	Yes	No
Est-6	NM_001274820	0.235464	0.719358	3.05507	1	21.7187	No	No	No	No
atl	NM_170157	48.7036	37.2585	0.765005	566	64.2835	Yes	Yes	Yes	No
Ets98B	NM_079811	0.0825503	0	0	0	NA	No	No	No	No
scaf	NM_165441	1.10264	0	0	10	57.6127	No	No	No	No
Aats-arg	NM_132853	45.7252	59.1162	1.29286	173	44.0867	Yes	Yes	Yes	No
CG10663	NM_001104123	0.452993	0.259486	0.572826	1	157.214	No	No	No	No
scat	NM_080166	35.6656	4.31731	0.12105	276	47.2452	Yes	Yes	Yes	No
Ptpmeg	NM_167831	52.0979	2.18122	0.0418677	384	42.6033	Yes	No	Yes	No
Phae2	NM_001298942	0	0	NA	0	NA	No	No	No	No
betaTry	NM_001299385	0	0	NA	0	NA	No	No	No	No
Crys	NM_001298925	0	0	NA	0	NA	No	No	No	No
betaCOP	NM_078676	31.1336	63.7219	2.04673	53	63.5723	Yes	Yes	No	No
CG11041	NM_137609	0	0	NA	0	NA	No	No	No	No
vlc	NM_001169585	135.661	59.0083	0.434967	601	41.9888	Yes	Yes	Yes	No
CG11044	NM_137612	0	0	NA	0	NA	No	No	No	No
CG8526	NM_141696	2.67383	0	0	15	52.9419	No	No	No	No
CG8525	NM_136937	6.25771	1.7206	0.274956	52	36.1312	No	No	No	No
CG1291	NM_139515	21.4278	15.3576	0.716711	91	68.0898	Yes	Yes	No	No
HLH3B	NM_080316	0	0	NA	0	NA	No	No	No	No
Lpt	NM_138003	15.7519	5.18382	0.329092	112	56.0065	Yes	Yes	Yes	No
CG9922	NM_001275627	144.308	80.6898	0.559151	870	50.6941	Yes	Yes	Yes	No
CG1299	NM_139605	0	0	NA	0	NA	No	No	No	No
CG2807	NM_001272908	20.7287	15.4971	0.747615	171	52.0749	Yes	Yes	Yes	No
CG15812	NM_079173	49.6953	0.378295	0.0076123	308	30.3911	Yes	No	Yes	No
CG15814	NM_133019	51.7441	1.24474	0.0240557	28	33.8578	Yes	No	No	No
CG15818	NM_135272	0	0	NA	0	NA	No	No	No	No
Cwc25	NM_134861	45.2972	11.2815	0.249055	220	51.3093	Yes	Yes	Yes	No
PPO3	NM_080021	0.994232	1.13904	1.14565	5	66.9271	No	No	No	No
PPO2	NM_136599	0.0620465	0.284335	4.58261	0	NA	No	No	No	No
CkIIbeta2	NM_058059	0.20394	0	0	0	NA	No	No	No	No
EMC8-9	NM_137887	89.65	186.649	2.08197	285	85.2878	Yes	Yes	Yes	No
beta3GalTII	NM_136555	14.2628	10.3747	0.727398	131	48.27	Yes	Yes	Yes	No
CG6472	NM_137322	0	0	NA	0	NA	No	No	No	No
CG6470	NM_001298480	0.129049	0	0	2	74.8083	No	No	No	No
CG6475	NM_001104389	0	0	NA	0	NA	No	No	No	No
Ir68a	NM_140198	0	0	NA	1	118.201	No	No	No	No
CG6479	NM_140711	77.0528	42.6034	0.552911	786	34.0083	Yes	Yes	Yes	No
sw	NM_057730	7.21658	7.88843	1.0931	0	NA	Yes	Yes	No	No
CG1124	NM_141252	2.52047	4.95014	1.96397	44	45.2925	No	No	No	No
CG1126	NM_141242	0	0	NA	0	NA	No	No	No	No
cDIP	NM_142694	0.0770299	0.352998	4.58261	0	NA	No	No	No	No
CG1129	NM_001300235	32.8612	19.3616	0.589192	130	35.2815	Yes	Yes	Yes	No
Su(z)2	NM_001169663	3.61833	0	0	15	47.4964	Yes	No	No	No
Eig71Ei	NM_001274960	0	0	NA	0	NA	No	No	No	No
Eig71Eh	NM_140537	0	0	NA	0	NA	No	No	No	No
Eig71Ek	NM_140540	0	0	NA	0	NA	No	No	No	No
Eig71Ej	NM_140539	0	0	NA	0	NA	No	No	No	No
ND-B8	NM_144084	0	0	NA	0	NA	No	No	No	No
Eig71Ed	NM_079367	0	0	NA	0	NA	No	No	No	No
Eig71Eg	NM_079370	0	0	NA	0	NA	No	No	No	No
CG4186	NM_001300203	21.5313	46.594	2.16401	150	36.051	No	No	Yes	No
Eig71Ea	NM_079364	0	0	NA	0	NA	No	No	No	No
Eig71Ec	NM_079366	0	0	NA	0	NA	No	No	No	No
Eig71Eb	NM_079365	0	0	NA	0	NA	No	No	No	No
Nup153	NM_001103532	38.1662	10.4285	0.273239	379	60.3577	Yes	Yes	Yes	No
AP-2alpha	NM_057471	88.0648	19.5307	0.221777	697	44.1456	Yes	Yes	Yes	No
CG15227	NM_137675	0	0	NA	0	NA	No	No	No	No
CG15554	NM_143587	0	0	NA	0	NA	No	No	No	No
CapaR	NM_001275246	0	0	NA	0	NA	No	No	No	No
wry	NM_205889	0.0363327	0	0	0	NA	No	No	No	No
Lsp1beta	NM_001298627	0	0	NA	0	NA	No	No	No	No
CG15556	NM_143588	0	0	NA	0	NA	No	No	No	No
Nup154	NM_001298898	63.4616	62.8114	0.989754	401	91.023	Yes	Yes	Yes	No
CG15550	NM_143578	0	0	NA	0	NA	No	No	No	No
CG10804	NM_001144678	0	0	NA	3	39.021	No	No	No	No
CG10553	NM_143126	0	0	NA	0	NA	No	No	No	No
CG17270	NM_142658	40.8367	0	0	342	22.7035	Yes	No	Yes	No
CG17271	NM_142659	59.8573	145.388	2.4289	404	87.3511	Yes	Yes	Yes	No
CG10801	NM_130702	0	0	NA	4	33.7663	No	No	No	No
CG10802	NM_130706	38.6725	23.0568	0.596206	145	60.7146	Yes	Yes	Yes	No
CG10555	NM_001298087	27.2403	30.2685	1.11117	111	63.5249	Yes	Yes	Yes	No
CG17278	NM_143973	0.644576	0	0	4	39.8118	No	No	No	No
CG10559	NM_143125	0.207685	0	0	0	NA	No	No	No	No
CG10809	NM_001169932	28.5873	2.77552	0.0970891	234	55.8536	Yes	No	Yes	No
CG7987	NM_169587	52.6145	0.59978	0.0113995	336	43.6594	Yes	No	Yes	No
CG7988	NM_142434	3.50432	0.72995	0.2083	47	47.0376	No	No	No	No
C3G	NM_176694	12.7904	1.76851	0.138268	88	59.3645	Yes	No	No	No
CG1440	NM_001298089	117.354	255.228	2.17485	752	50.7514	Yes	Yes	Yes	No
AcCoAS	NM_168894	32.6376	0.290418	0.00889826	272	40.8652	Yes	No	Yes	No
tra	NM_001014588	2.0394	0	0	36	40.0386	No	No	No	No
caps	NM_079332	1.97717	2.53696	1.28313	25	66.5754	No	No	No	No
CG14294	NM_142500	0	0	NA	0	NA	No	No	No	No
CG14079	NM_140834	0.163688	0	0	0	NA	No	No	No	No
CG14071	NM_001259034	0	0	NA	0	NA	No	No	No	No
CG14070	NM_001298889	0	0	NA	0	NA	No	No	No	No
CG14073	NM_140803	30.6308	1.9745	0.0644612	56	67.2965	Yes	Yes	No	No
CG14072	NM_001259035	0	0	NA	0	NA	No	No	No	No
abd-A	NM_001260216	0.131923	0	0	1	8.01897	No	No	No	No
CG14074	NM_001259897	22.913	5.33904	0.233014	102	44.6994	Yes	No	Yes	No
CG11425	NM_141138	0	0	NA	0	NA	No	No	No	No
upd1	NM_080356	0	0	NA	17	47.302	No	No	No	No
Cdc5	NM_138189	25.5559	23.5653	0.92211	159	49.7653	Yes	Yes	Yes	No
Cdc6	NM_139990	71.0234	20.5809	0.289776	359	53.4561	Yes	Yes	Yes	No
Cdc7	NM_167080	76.4114	1.38843	0.0181705	600	58.6919	Yes	No	Yes	No
CG12898	NM_136737	0	0	NA	0	NA	No	No	No	No
CG5973	NM_001169430	10.2499	20.5902	2.00881	96	48.5197	No	Yes	No	No
eIF3-S8	NM_001299616	141.327	35.6971	0.252585	620	59.1964	Yes	Yes	Yes	No
eIF3-S9	NM_166239	222.979	56.6428	0.254027	1111	65.3033	Yes	Yes	Yes	No
ftz	NM_058150	0	0	NA	0	NA	No	No	No	No
CG12895	NM_001273939	49.6431	77.1857	1.55481	192	61.9717	Yes	Yes	Yes	No
CG12896	NM_136740	0.202942	0	0	0	NA	No	No	No	No
e(y)2	NM_080107	63.6595	62.3537	0.979488	248	57.6253	Yes	Yes	Yes	No
e(y)3	NM_001272789	100.173	17.5677	0.175374	574	48.7174	Yes	Yes	Yes	No
e(y)1	NM_078667	34.6179	40.5656	1.17181	214	37.3574	Yes	Yes	Yes	No
CG34011	NM_001038789	0	0	NA	0	NA	No	No	No	No
CG34010	NM_001038794	0.316145	0	0	1	90.5979	No	No	No	No
CG31064	NM_143288	5.14468	0.673601	0.130932	88	37.4254	Yes	No	No	No
CG43349	NM_001272934	0	0	NA	0	NA	No	No	No	No
CG43348	NM_001272933	0	0	NA	0	NA	No	No	No	No
CG9154	NM_001298733	7.40019	9.16545	1.23854	54	47.6368	No	No	No	No
CG42564	NM_141394	0	0	NA	0	NA	No	No	No	No
CG42566	NM_001299811	0	0	NA	0	NA	No	No	No	No
CG32263	NM_168041	0	0	NA	0	NA	No	No	No	No
CG42561	NM_001169709	0	0	NA	0	NA	No	No	No	No
CG42562	NM_137401	0	0	NA	1	10.6054	No	No	No	No
CG32267	NM_168032	190.337	51.3082	0.269565	1624	54.9205	Yes	No	Yes	No
Cpr30F	NM_164879	0	0	NA	0	NA	No	No	No	No
Cpr30B	NM_135451	1.2078	12.4534	10.3109	8	78.8927	No	No	No	No
pen-2	NM_001299637	49.5669	93.5306	1.88696	432	43.1021	Yes	Yes	Yes	No
atms	NM_001275334	43.5848	26.1944	0.600997	209	76.3032	Yes	Yes	Yes	No
CG7236	NM_001298706	0	0	NA	0	NA	No	No	No	No
CG11601	NM_001298617	20.9471	7.32765	0.349817	87	57.7555	Yes	No	No	No
CG11600	NM_141960	0	0	NA	0	NA	No	No	No	No
Hexim	NM_169595	69.8489	19.3158	0.276537	604	54.812	Yes	Yes	Yes	No
CG11608	NM_141961	0	0	NA	0	NA	No	No	No	No
Ef1beta	NM_001299577	981.359	234.852	0.239313	6814	59.3081	Yes	Yes	Yes	No
w	NM_057439	16.5542	43.5919	2.63329	154	48.3909	Yes	Yes	Yes	No
Aats-tyr-m	NM_138123	19.9785	12.2919	0.615257	73	52.395	Yes	Yes	No	No
CG31739	NM_001273590	54.4045	2.49493	0.0458588	405	45.9682	Yes	No	Yes	No
Dic4	NM_001275092	0	0	NA	0	NA	No	No	No	No
CG34451	NM_001259846	0	0	NA	1	74.3079	No	No	No	No
Tep5	NM_136144	0	0	NA	0	NA	No	No	No	No
Tep4	NM_001273662	0.708931	6.2376	8.7986	6	33.4151	No	Yes	No	No
CG7239	NM_135116	25.5354	4.71504	0.184647	208	29.5113	Yes	No	Yes	No
Prosbeta2R1	NM_132039	0	0	NA	0	NA	No	No	No	No
CG15653	NM_137696	15.3153	4.92519	0.321586	124	23.5559	No	No	Yes	No
CG15650	NM_001299726	0	0	NA	0	NA	No	No	No	No
Prosbeta2R2	NM_141258	0	0	NA	0	NA	No	No	No	No
CG32085	NM_168470	0	0	NA	0	NA	No	No	No	No
CG32086	NM_168464	0	0	NA	0	NA	No	No	No	No
CG32087	NM_168474	0	0	NA	0	NA	No	No	No	No
CG32081	NM_168430	0	0	NA	0	NA	No	No	No	No
CG32082	NM_168448	0.195541	0	0	0	NA	No	No	No	No
CG15382	NM_134806	0.880212	0	0	6	45.0155	No	No	No	No
CG15385	NM_134810	0.580645	0	0	41	47.2034	No	No	No	No
CAH1	NM_078837	0	0	NA	0	NA	No	No	No	No
CG31687	NM_001273698	0.494645	0	0	0	NA	No	No	No	No
CG43965	NM_001274669	8869.77	18328	2.06635	29234	47.6445	Yes	Yes	Yes	No
Srp54	NM_057999	80.045	35.9173	0.448713	499	48.7114	Yes	Yes	Yes	No
CG31681	NM_164473	0	0	NA	0	NA	No	No	No	No
CG31680	NM_165333	0	0	NA	0	NA	No	No	No	No
Etf-QO	NM_136692	50.3957	116.602	2.31373	340	70.8814	Yes	Yes	Yes	No
CG31689	NM_164495	54.5216	7.92674	0.145387	725	65.682	Yes	Yes	Yes	No
CG43968	NM_001275309	0.0410436	0	0	0	NA	No	No	No	No
jeb	NM_001273981	0	0	NA	0	NA	No	No	No	No
CG14380	NM_142005	0	0	NA	0	NA	No	No	No	No
CG13760	NM_130654	27.1728	3.38836	0.124697	246	23.1647	Yes	No	Yes	No
NFAT	NM_001169276	18.3802	3.25209	0.176935	148	53.9247	Yes	No	Yes	No
CG13766	NM_001298752	22.0269	0	0	167	32.9568	Yes	No	Yes	No
CG18004	NM_165808	56.1773	0.690183	0.0122858	459	31.9548	Yes	No	Yes	No
Pallidin	NM_140237	27.9496	12.5571	0.449275	152	32.7619	Yes	No	Yes	No
CG15036	NM_144273	0	0	NA	0	NA	No	No	No	No
CG15034	NM_001298051	0	0	NA	0	NA	No	No	No	No
CG15035	NM_132168	0	0	NA	0	NA	No	No	No	No
CG5791	NM_001316505	0	0	NA	0	NA	No	No	No	No
Or19b	NM_167690	0	0	NA	0	NA	No	No	No	No
CG3225	NM_135016	7.38781	3.72984	0.504863	51	45.8513	Yes	No	No	No
Or19a	NM_080274	0	0	NA	0	NA	No	No	No	No
CG33687	NM_001031959	0	0	NA	0	NA	No	No	No	No
CG33689	NM_001031961	0	0	NA	0	NA	No	No	No	No
CG33688	NM_001031960	0	0	NA	0	NA	No	No	No	No
CG9601	NM_141535	30.5695	7.49134	0.245059	69	52.654	Yes	Yes	No	No
ND-B12	NM_001169769	146.383	120.867	0.825695	788	55.0859	Yes	Yes	Yes	No
CG3594	NM_079131	27.6058	14.5969	0.528762	119	47.6179	Yes	Yes	Yes	No
CG6118	NM_001104336	0	0	NA	0	NA	No	No	No	No
CG9609	NM_132933	79.7594	15.209	0.190686	362	44.2424	Yes	Yes	Yes	No
CG6115	NM_001299072	66.9864	87.7063	1.30932	675	53.3396	Yes	Yes	Yes	No
crol	NM_164971	49.8671	0.661103	0.0132573	463	40.041	Yes	No	Yes	No
CG3760	NM_001259584	119.913	187.49	1.56355	550	55.6145	Yes	Yes	Yes	No
CG14325	NM_142384	0	0	NA	0	NA	No	No	No	No
CG13659	NM_143121	0.929925	3.78798	4.07343	5	44.6058	No	No	No	No
CG3764	NM_001275048	25.0804	0	0	133	40.7049	Yes	No	Yes	No
Acp53Ea	NM_057803	0	0	NA	0	NA	No	No	No	No
CG5828	NM_001273156	58.7193	29.7152	0.506055	264	39.7284	Yes	Yes	Yes	No
CG3984	NM_142163	0.397709	1.09352	2.74956	2	102.857	No	No	No	No
Hcf	NM_205873	47.8839	28.9334	0.604241	485	56.6024	Yes	Yes	Yes	No
CG3987	NM_142164	0	0	NA	0	NA	No	No	No	No
aay	NM_079277	70.9245	135.985	1.91732	367	48.9403	Yes	Yes	Yes	No
uex	NM_001110921	128.254	13.2363	0.103204	720	48.4568	Yes	Yes	Yes	No
Rcd-1	NM_001272793	94.0291	121.877	1.29616	828	67.1211	Yes	Yes	Yes	No
CG6567	NM_001104272	44.4297	26.8584	0.604514	213	69.5209	Yes	Yes	Yes	No
Ctf4	NM_137077	51.1195	52.298	1.02305	421	63.9985	Yes	Yes	Yes	No
CG7609	NM_170424	31.3187	6.98886	0.223153	239	57.5411	Yes	Yes	Yes	No
CG7607	NM_140192	4.11024	0	0	9	97.543	No	No	No	No
CG7606	NM_001316519	0	0	NA	0	NA	No	No	No	No
CG7601	NM_143460	25.522	26.9431	1.05568	108	104.729	Yes	Yes	Yes	No
CG7600	NM_140196	27.4078	0	0	154	30.0538	Yes	No	Yes	No
Mst33A	NM_058117	0	0	NA	0	NA	No	No	No	No
Rad51D	NM_133074	14.8647	0	0	100	22.1452	Yes	No	Yes	No
Rad51C	NM_136622	1.81233	1.77968	0.981987	3	17.3508	No	No	No	No
Aats-his	NM_001272757	90.4331	49.4197	0.546478	449	101.533	Yes	Yes	Yes	No
CG14926	NM_001298912	0	0	NA	0	NA	No	No	No	No
Ir10a	NM_001103479	0	0	NA	0	NA	No	No	No	No
CG14921	NM_135647	0.184849	0	0	0	NA	No	No	No	No
Fer2LCH	NM_170483	327.294	2395.46	7.31898	2184	73.459	Yes	Yes	Yes	No
LSm7	NM_135963	126.162	286.053	2.26735	510	79.5396	Yes	Yes	Yes	No
LSm1	NM_137715	65.2775	147.221	2.25531	275	70.1704	Yes	Yes	Yes	No
CG14929	NM_135663	0	0	NA	0	NA	No	No	No	No
CG10237	NM_001273648	245.521	399.915	1.62884	543	84.7135	Yes	Yes	Yes	No
hgo	NM_078820	0	0	NA	0	NA	No	No	No	No
CG10232	NM_142918	0	0	NA	0	NA	No	No	No	No
Eaf6	NM_139724	47.1465	25.4181	0.53913	227	44.6604	Yes	Yes	Yes	No
Klp61F	NM_057470	44.2182	11.76	0.265955	549	46.2435	Yes	Yes	Yes	No
Dlic	NM_167274	112.241	33.4411	0.29794	669	57.7735	Yes	Yes	Yes	No
Nmnat	NM_143058	18.7716	0.50901	0.027116	115	36.1331	Yes	No	Yes	No
CG17715	NM_001042945	9.79174	0	0	0	NA	No	No	No	No
CG17717	NM_132099	0	0	NA	1	120.316	No	No	No	No
CG17712	NM_134775	30.172	4.12736	0.136794	205	37.6609	Yes	No	Yes	No
CG12560	NM_001298807	5.3385	4.44804	0.833201	46	79.9416	No	No	No	No
Brca2	NM_138081	32.7286	0.596746	0.0182332	171	55.2337	Yes	No	Yes	No
CG12567	NM_001170363	137.682	0	0	100	34.0272	Yes	No	Yes	No
Dhx15	NM_136425	37.786	46.886	1.24083	130	67.2208	Yes	Yes	Yes	No
l(1)G0004	NM_134543	34.197	58.4491	1.70919	217	48.6337	Yes	Yes	Yes	No
Pp2B-14D	NM_001258786	38.3757	15.0836	0.39305	371	83.0682	Yes	Yes	Yes	No
l(1)G0007	NM_132719	21.5875	6.61614	0.30648	53	102.908	Yes	Yes	No	No
CG34325	NM_001298418	1.77719	5.81725	3.27329	6	63.7824	No	No	No	No
exd	NM_001272663	90.1089	32.6972	0.362863	994	37.6467	Yes	Yes	Yes	No
CG34456	NM_001104089	0	0	NA	0	NA	No	No	No	No
asun	NM_079655	16.505	15.2401	0.923361	120	54.1999	Yes	Yes	Yes	No
CG43251	NM_001259921	0	0	NA	0	NA	No	No	No	No
exu	NM_001169747	451.112	23.5544	0.0522141	5039	20.613	Yes	Yes	Yes	No
CG1468	NM_132357	0.217869	0	0	0	NA	No	No	No	No
Sec31	NM_001299286	30.3593	76.511	2.52018	240	74.4331	Yes	Yes	Yes	No
CG34452	NM_001300144	0	0	NA	0	NA	No	No	No	No
CG1461	NM_001298309	0	0	NA	1	30.7111	No	No	No	No
CG1463	NM_132585	23.9486	7.71195	0.322021	99	43.2338	Yes	No	No	No
CG14324	NM_169766	0	0	NA	0	NA	No	No	No	No
CG10793	NM_130698	0	0	NA	2	42.8265	No	No	No	No
CG34436	NM_001104484	0	0	NA	0	NA	No	No	No	No
Cyp4d20	NM_139466	0	0	NA	0	NA	No	No	No	No
Pino	NM_001272925	65.6721	15.9038	0.24217	840	17.9712	Yes	No	Yes	No
CG43089	NM_001300001	0	0	NA	0	NA	No	No	No	No
Vha16-3	NM_001202157	0	0	NA	0	NA	No	No	No	No
Reck	NM_140476	0.157174	0	0	2	38.7141	No	No	No	No
CG5111	NM_143145	0	0	NA	0	NA	No	No	No	No
CG5110	NM_001259133	41.7229	40.3449	0.966972	114	77.4061	Yes	Yes	Yes	No
CG31644	NM_001298711	0	0	NA	1	130.783	No	No	No	No
Gyk	NM_079916	16.7512	9.82288	0.5864	29	57.3497	Yes	Yes	No	No
CG5114	NM_001259831	25.5954	7.08188	0.276686	154	32.246	Yes	No	Yes	No
CG32444	NM_168930	0.702182	0	0	1	67.4577	No	No	No	No
Alas	NM_057933	26.6239	2.54181	0.0954709	187	32.4385	Yes	No	Yes	No
CG32445	NM_168931	0	0	NA	0	NA	No	No	No	No
CG1603	NM_001273849	29.3013	0.666383	0.0227425	167	31.5307	Yes	No	Yes	No
CG1602	NM_136447	13.5189	2.36974	0.175291	43	51.0738	Yes	No	No	No
CG1607	NM_143608	0.0847434	0	0	0	NA	No	No	No	No
CG32447	NM_001275259	0	0	NA	0	NA	No	No	No	No
CG42692	NM_001201875	0	0	NA	0	NA	No	No	No	No
BicD	NM_001273601	79.3822	8.18312	0.103085	317	61.3087	Yes	Yes	Yes	No
Hs2st	NM_057991	36.5746	2.28036	0.0623484	285	42.4529	Yes	No	Yes	No
Pvr	NM_205927	0.527603	3.05406	5.78855	13	67.6705	No	Yes	No	No
Mur82C	NM_141224	0	0	NA	0	NA	No	No	No	No
sigmar	NM_166622	64.0154	5.86715	0.0916521	288	51.9207	Yes	No	Yes	No
bip2	NM_143666	89.2685	3.00695	0.0336844	316	54.7695	Yes	Yes	Yes	No
bip1	NM_139912	52.4344	1.8846	0.035942	295	43.9745	Yes	No	Yes	No
crq	NM_175943	116.901	85.5536	0.731849	752	68.8859	Yes	Yes	Yes	No
CG13168	NM_206101	0	0	NA	0	NA	No	No	No	No
Or85c	NM_079556	0	0	NA	0	NA	No	No	No	No
Or85b	NM_079555	0	0	NA	0	NA	No	No	No	No
CG13164	NM_165873	0	0	NA	0	NA	No	No	No	No
CG34221	NM_001299343	0.888595	0	0	8	54.5007	No	No	No	No
LysD	NM_057475	0	4.58518	NA	0	NA	No	No	No	No
CG13163	NM_001299413	24.3439	31.6229	1.29901	94	60.6246	Yes	Yes	No	No
Or85e	NM_001275445	0	0	NA	0	NA	No	No	No	No
Or85d	NM_079557	0	0	NA	0	NA	No	No	No	No
crb	NM_001260355	21.5556	28.1138	1.30425	441	41.123	Yes	Yes	Yes	No
crc	NM_165374	164.5	22.8844	0.139115	859	78.9574	Yes	Yes	Yes	No
CG2065	NM_001273858	0.291684	0	0	1	60.4634	No	No	No	No
LysP	NM_057480	0	0	NA	0	NA	No	No	No	No
Drl-2	NM_001299442	0	0	NA	0	NA	No	No	No	No
crn	NM_057770	24.2885	9.69072	0.398983	151	40.1206	Yes	Yes	Yes	No
CG45105	NM_001300418	0	0	NA	0	NA	No	No	No	No
crm	NM_166951	55.4	2.75311	0.0496952	667	52.8261	Yes	No	Yes	No
CG11836	NM_170199	35.2009	11.9151	0.338488	162	55.2544	Yes	No	Yes	No
sev	NM_078559	0.0326732	0.149728	4.58261	0	NA	No	No	No	No
CG11835	NM_001298620	0	0	NA	0	NA	No	No	No	No
312	NM_138261	39.014	5.90331	0.151312	163	40.3882	Yes	No	Yes	No
CG11839	NM_170198	25.4026	11.96	0.470816	194	47.0752	Yes	No	Yes	No
Zmynd10	NM_140368	0.381021	0.436517	1.14565	2	97.5725	No	No	No	No
XRCC1	NM_131989	31.9498	2.5408	0.0795246	133	44.2734	Yes	No	Yes	No
sel	NM_136703	67.9433	15.3486	0.225903	356	35.8557	Yes	No	Yes	No
Cyp28d1	NM_135068	0.170532	0	0	1	15.5948	No	No	No	No
sei	NM_001299885	7.65787	1.81125	0.236522	45	53.7557	Yes	No	No	No
Cyp28d2	NM_135067	0	0	NA	1	56.5146	No	No	No	No
CG4646	NM_001299453	56.854	61.9103	1.08894	226	46.6844	Yes	Yes	Yes	No
CG8778	NM_136961	42.8825	65.0574	1.51711	164	100.341	Yes	Yes	Yes	No
CG4645	NM_001298242	39.6212	38.6315	0.975022	238	42.6729	Yes	Yes	Yes	No
CG30103	NM_166233	0	0	NA	0	NA	No	No	No	No
CG30101	NM_137361	6.63838	13.9937	2.108	24	93.9172	No	Yes	No	No
CG8773	NM_142016	0.0423861	0.194239	4.58261	0	NA	No	No	No	No
CG8771	NM_001259354	18.6683	21.6698	1.16078	115	70.9589	Yes	Yes	Yes	No
CG8777	NM_136608	3.44051	7.02467	2.04175	30	45.8206	Yes	Yes	No	No
CG8774	NM_169502	0.0477006	0	0	0	NA	No	No	No	No
tho2	NM_134802	24.4778	24.3039	0.992898	206	68.2929	Yes	Yes	Yes	No
Pp1alpha-96A	NM_001275990	68.1954	9.15564	0.134256	255	44.2747	Yes	No	Yes	No
Cctgamma	NM_169727	169.848	276.593	1.62848	529	83.6947	Yes	Yes	Yes	No
nopo	NM_001274142	53.2307	15.4447	0.290146	248	50.0297	Yes	Yes	Yes	No
Fas1	NM_001275716	58.9245	182.57	3.09838	217	60.2661	Yes	Yes	Yes	No
Jon99Fi	NM_143543	0	0	NA	0	NA	No	No	No	No
sip1	NM_001298707	10.4257	6.92418	0.664146	53	67.7539	Yes	Yes	No	No
CG43288	NM_001258593	0	0	NA	0	NA	No	No	No	No
sip3	NM_001276223	28.2642	12.4542	0.440635	238	48.7689	Yes	Yes	Yes	No
CG13575	NM_138059	0	0	NA	0	NA	No	No	No	No
CG31475	NM_169851	0.103068	0	0	0	NA	No	No	No	No
CG13577	NM_138061	0	0	NA	0	NA	No	No	No	No
VGlut	NM_001273010	0	0	NA	0	NA	No	No	No	No
ND-20	NM_001298384	99.563	136.044	1.36642	969	69.74	Yes	Yes	Yes	No
ND-23	NM_079980	100.717	170.839	1.69622	899	65.9514	Yes	Yes	Yes	No
ND-24	NM_133000	75.4847	152.808	2.02435	408	83.3542	Yes	Yes	Yes	No
CG17333	NM_132428	41.0421	35.9442	0.875787	316	34.0513	Yes	Yes	Yes	No
CG42779	NM_001300441	0	0	NA	0	NA	No	No	No	No
CG42778	NM_001202289	0	0	NA	1	66.6596	No	No	No	No
Ced-12	NM_135704	29.1543	21.4622	0.736161	175	37.2738	Yes	Yes	Yes	No
CG42811	NM_001202350	0	0	NA	0	NA	No	No	No	No
FKBP59	NM_001298855	174.752	386.046	2.2091	221	119.178	Yes	Yes	Yes	No
CG3517	NM_142550	0	0	NA	0	NA	No	No	No	No
[truncated: 10,405 more rows]

## Sheet: Stage 14 oocytes wt
Supplementary File 2D. Processed RNA-seq, ribosome profiling, and PAL-seq data for wild-type stage 14 oocytes.
Otherwise, this table is as in Supplementary File 2A.
Gene name	Initial Refseq ID	RNA (RPKM)	RPF (RPKM)	TE	Poly(A) tags	Mean poly(A)-tail length	Passing RNA cutoff (>=10 RPM)	Passing RPF cutoff(>=10 RPM)	Passing poly(A)-tag cutoff (>=100 tags)	Excluded from analysis
CG11790	NM_170192	87.759	29.4399	0.335463	633	49.1579	Yes	Yes	Yes	No
CG11796	NM_140968	0	0	NA	0	NA	No	No	No	No
CG12081	NM_001272414	30.8175	15.3051	0.496638	226	62.6093	Yes	Yes	Yes	No
CG13321	NM_001299438	1.34143	9.13716	6.81153	31	71.8298	No	No	No	No
CG13322	NM_165963	31.8015	2.58647	0.0813317	286	38.2793	Yes	No	Yes	No
CG13323	NM_001299441	0	0	NA	1	5.8908	No	No	No	No
CG13324	NM_136989	0	0	NA	0	NA	No	No	No	No
CG13325	NM_001299444	0	0	NA	0	NA	No	No	No	No
CG13326	NM_136994	0.0354965	0	0	0	NA	No	No	No	No
CG14247	NM_143245	0	0	NA	0	NA	No	No	No	No
rictor	NM_133143	38.1453	12.1767	0.31922	235	49.2807	Yes	Yes	Yes	No
CG4101	NM_140651	59.309	51.9409	0.875768	468	53.6346	Yes	Yes	Yes	No
Syt1	NM_001273037	0	0	NA	67	64.0249	No	No	No	No
SPR	NM_001297964	0.0720652	1.9635	27.2461	6	51.0705	No	No	No	No
snRNP-U1-70K	NM_001273244	70.737	24.7579	0.35	372	53.5734	Yes	Yes	Yes	No
Syt4	NM_058116	0	0	NA	0	NA	No	No	No	No
CG8654	NM_001299695	0	0	NA	0	NA	No	No	No	No
Syt7	NM_205871	0.45216	0	0	6	59.9227	No	No	No	No
Sac1	NM_138243	56.6285	26.0008	0.459148	597	68.8495	Yes	Yes	Yes	No
Cyp6a19	NM_001299505	346.117	133.347	0.385264	2351	48.1098	Yes	Yes	Yes	No
Cyp6a18	NM_001300633	0	0	NA	0	NA	No	No	No	No
Cyp6a17	NM_001299504	0	2.37508	NA	0	NA	No	No	No	No
Cyp6a16	NM_001298702	0	0	NA	0	NA	No	No	No	No
Cyp6a14	NM_001299270	0.245353	0.668492	2.72461	2	32.6195	No	No	No	No
Cyp6a13	NM_136546	1.64602	5.17474	3.14378	5	63.9507	No	No	No	No
bocks	NM_001014611	26.8032	65.7256	2.45215	287	52.8466	Yes	Yes	Yes	No
eIF2B-epsilon	NM_206606	27.6599	13.3586	0.482958	240	48.581	Yes	Yes	Yes	No
Tektin-C	NM_001274520	0	0	NA	0	NA	No	No	No	No
Tektin-A	NM_001273547	0	0	NA	0	NA	No	No	No	No
CG13492	NM_166487	0	0	NA	0	NA	No	No	No	No
CG31710	NM_001273365	2.53392	14.575	5.75196	20	70.6095	No	No	No	No
CG31712	NM_001273379	18.019	4.60263	0.255432	437	58.2919	Yes	No	Yes	No
CG31715	NM_164917	177.299	136.011	0.767124	679	54.3553	Yes	Yes	Yes	No
NimB5	NM_001298990	0	0	NA	0	NA	No	No	No	No
CG13494	NM_137777	0	0	NA	0	NA	No	No	No	No
shtd	NM_132797	27.709	24.198	0.873292	333	59.3007	Yes	Yes	Yes	No
CG4049	NM_138041	13.9277	4.4322	0.318229	280	42.3145	Yes	Yes	Yes	No
CG4041	NM_131969	24.6018	3.07479	0.124982	235	43.8248	Yes	No	Yes	No
CG4042	NM_001275192	55.7462	24.8542	0.445846	243	62.1729	Yes	Yes	Yes	No
CG4045	NM_130622	38.9792	8.56476	0.219727	370	36.7747	Yes	No	Yes	No
14-3-3zeta	NM_165742	351.316	1393.45	3.96637	1618	59.8561	Yes	Yes	Yes	No
FeCH	NM_170579	47.1513	85.0253	1.80325	867	49.4067	Yes	Yes	Yes	No
Oli	NM_078868	0	0	NA	0	NA	No	No	No	No
Gp210	NM_001273785	48.5209	102.946	2.12168	280	98.2334	Yes	Yes	Yes	No
CG31698	NM_001298647	0	0	NA	15	32.1941	No	No	No	No
Prp38	NM_136619	36.5324	30.9087	0.846064	128	41.6098	Yes	Yes	Yes	No
RpL24-like	NM_141816	378.316	57.7604	0.152678	2834	37.3078	Yes	Yes	Yes	No
Rtf1	NM_001299788	62.8796	26.8911	0.427661	489	64.6989	Yes	Yes	Yes	No
CG14569	NM_141097	0	0	NA	0	NA	No	No	No	No
CG14568	NM_141098	0	0	NA	0	NA	No	No	No	No
CG14567	NM_141100	0	0	NA	0	NA	No	No	No	No
CG14566	NM_141101	0	0	NA	0	NA	No	No	No	No
CG14565	NM_141103	0	0	NA	0	NA	No	No	No	No
CG14564	NM_141104	0	0	NA	0	NA	No	No	No	No
CG14563	NM_141112	0	0	NA	0	NA	No	No	No	No
CG14562	NM_001275270	11.9261	6.49878	0.544922	234	45.6952	Yes	Yes	Yes	No
CG14561	NM_001275272	45.7526	0.461697	0.0100912	895	25.8693	Yes	No	Yes	No
CG13185	NM_001103809	7.10742	1.64363	0.231256	88	37.3765	Yes	Yes	No	No
vig2	NM_170206	320.315	175.128	0.546738	3306	56.1112	Yes	Yes	Yes	No
CG8204	NM_137206	22.7832	43.3234	1.90155	53	52.8979	No	Yes	No	No
CG10674	NM_139693	93.6036	136.434	1.45757	496	54.6092	Yes	Yes	Yes	No
CG10672	NM_139689	50.6441	104.377	2.06099	354	50.6939	Yes	Yes	Yes	No
Mst77F	NM_079464	0	0	NA	0	NA	No	No	No	No
CG12811	NM_141715	61.7829	130.097	2.10571	137	72.2739	Yes	Yes	Yes	No
Pif2	NM_169147	0	0	NA	0	NA	No	No	No	No
CG12814	NM_001043235	0	0.209862	NA	0	NA	No	No	No	No
CG12817	NM_001043236	0	0	NA	0	NA	No	No	No	No
CG12818	NM_141739	32.4016	59.8624	1.84751	182	44.268	Yes	Yes	Yes	No
CG18446	NM_136685	43.7261	1.92156	0.0439454	448	45.3373	Yes	No	Yes	No
CG8209	NM_139910	75.4205	505.243	6.69901	399	52.3785	Yes	Yes	Yes	No
H15	NM_001298698	0.187892	1.5358	8.17384	0	NA	No	No	No	No
nocte	NM_001272480	146.89	259.883	1.76923	780	54.4643	Yes	Yes	Yes	No
Dhap-at	NM_001276028	13.4421	8.21972	0.61149	136	45.1967	Yes	Yes	Yes	No
CG14309	NM_142461	0.095396	1.29959	13.6231	0	NA	No	No	No	No
Acp63F	NM_079182	0	0	NA	0	NA	No	No	No	No
CG14302	NM_142492	0	0	NA	0	NA	No	No	No	No
CG14301	NM_142477	0	0	NA	1	-5.75982	No	No	No	No
CG14300	NM_001014639	0	0	NA	0	NA	No	No	No	No
CG7246	NM_132292	39.9431	31.4552	0.787501	364	49.1717	Yes	Yes	Yes	No
CG7248	NM_140273	0	0	NA	0	NA	No	No	No	No
wtrw	NM_206459	2.02431	7.72165	3.81446	37	67.7946	No	Yes	No	No
FMRFaR	NM_001299996	0	0	NA	0	NA	No	No	No	No
Arl5	NM_139944	107.309	201.639	1.87904	544	53.122	Yes	Yes	Yes	No
nullo	NM_078512	0	0	NA	0	NA	No	No	No	No
CG15919	NM_144117	0	0	NA	0	NA	No	No	No	No
CG9689	NM_132359	0	0.523322	NA	0	NA	No	No	No	No
CG3906	NM_137958	0	0	NA	0	NA	No	No	No	No
CG3907	NM_138026	4.08865	8.99768	2.20065	33	62.2384	No	Yes	No	No
CG3902	NM_140812	95.9685	13.849	0.144307	877	17.9129	Yes	Yes	Yes	No
Br140	NM_001299226	49.3138	7.62621	0.154647	335	71.5271	Yes	Yes	Yes	No
CG9682	NM_143528	0	0	NA	0	NA	No	No	No	No
CG9684	NM_141540	56.3054	100.696	1.78839	178	59.6687	Yes	Yes	Yes	No
CG9686	NM_132358	0	0	NA	0	NA	No	No	No	No
CG42870	NM_001202336	0	0	NA	0	NA	No	No	No	No
CG42876	NM_001299036	0	0	NA	0	NA	No	No	No	No
CG4557	NM_132132	21.3468	5.29559	0.248074	221	54.0187	Yes	Yes	Yes	No
p47	NM_136440	138.767	264.26	1.90435	1055	60.961	Yes	Yes	Yes	No
Gr66a	NM_079247	0	0	NA	0	NA	No	No	No	No
CG42878	NM_001259507	0	0	NA	0	NA	No	No	No	No
CG2051	NM_141330	141.42	483.653	3.41997	911	41.2206	Yes	Yes	Yes	No
dnd	NM_142738	0.370033	2.01639	5.44922	15	69.1934	No	No	No	No
CG2053	NM_001300703	0	0	NA	0	NA	No	No	No	No
dnc	NM_166968	43.1422	6.2135	0.144024	224	72.5089	Yes	Yes	Yes	No
CG7024	NM_131954	0.0652216	0	0	1	39.2102	No	No	No	No
CG2059	NM_132160	48.0684	15.2091	0.316407	387	40.7263	Yes	Yes	Yes	No
lmd	NM_170044	0	0	NA	1	55.6345	No	No	No	No
CG7029	NM_176542	19.8101	18.1981	0.918625	215	62.1941	Yes	Yes	Yes	No
CG7028	NM_001299955	40.019	28.8436	0.720748	332	68.0773	Yes	Yes	Yes	No
dnk	NM_001275793	248.89	408.635	1.64183	1630	75.619	Yes	Yes	Yes	No
Gr97a	NM_001300622	0	0	NA	0	NA	No	No	No	No
CaMKI	NM_079883	102.766	37.8548	0.368358	513	63.6069	Yes	Yes	Yes	No
dnt	NM_001273638	17.015	3.76669	0.221375	82	39.7145	Yes	No	No	No
Jon44E	NM_001299274	0	0	NA	0	NA	No	No	No	No
Ostgamma	NM_135360	52.4913	208.241	3.96715	344	55.8526	Yes	Yes	Yes	No
BoYb	NM_141173	18.4502	29.1201	1.57831	151	63.7839	Yes	Yes	Yes	No
CG5089	NM_137298	0	0	NA	0	NA	No	No	No	No
CheA84a	NM_001031979	0	0	NA	0	NA	No	No	No	No
CG3347	NM_164530	0	0	NA	0	NA	No	No	No	No
CG5080	NM_164406	3.31196	13.3063	4.01765	60	67.4802	No	Yes	No	No
CG5087	NM_140022	19.3434	9.22307	0.476807	146	63.1479	Yes	Yes	Yes	No
CG5084	NM_001299627	0	0	NA	0	NA	No	No	No	No
CG1979	NM_141428	0	0	NA	0	NA	No	No	No	No
M1BP	NM_141568	46.2679	54.6405	1.18096	615	36.7232	Yes	Yes	Yes	No
CG1971	NM_143643	28.7124	11.3184	0.394199	160	49.8109	Yes	No	Yes	No
CG45061	NM_001298134	0	0	NA	0	NA	No	No	No	No
CG9356	NM_141632	33.1318	43.612	1.31632	156	59.5993	Yes	Yes	Yes	No
CG11231	NM_143696	0	0	NA	4	19.9562	No	No	No	No
CG11236	NM_135231	0	0	NA	0	NA	No	No	No	No
CG16956	NM_135810	0.659331	4.49105	6.81153	7	63.6499	No	No	No	No
CG8331	NM_001201998	239.407	1129.52	4.71799	1192	52.5506	Yes	Yes	Yes	No
CG8336	NM_168354	44.4241	14.7936	0.333008	318	49.5683	Yes	Yes	Yes	No
CG16952	NM_206740	34.1575	6.92698	0.202795	322	76.4066	Yes	Yes	Yes	No
CG8335	NM_136366	0	0	NA	0	NA	No	No	No	No
MrgBP	NM_136573	46.1443	19.5474	0.423615	356	57.6167	Yes	Yes	Yes	No
CG16959	NM_140493	0.0620096	0.337904	5.44922	1	37.7434	No	No	No	No
pinta	NM_001300537	23.0168	5.43929	0.236318	146	39.4461	Yes	No	Yes	No
CG33125	NM_175950	0	0	NA	0	NA	No	No	No	No
CG45095	NM_001300590	0	0	NA	0	NA	No	No	No	No
Sox102F	NM_001014695	0.602045	0.410085	0.681153	5	35.7976	No	No	No	No
FRG1	NM_140945	35.0855	21.0575	0.600177	234	24.67	Yes	Yes	Yes	No
cype	NM_001258957	432.104	868.555	2.01006	1976	74.4538	Yes	Yes	Yes	No
yata	NM_001276153	41.3812	8.45128	0.20423	208	60.696	Yes	Yes	Yes	No
ND-20L	NM_001300655	0	0	NA	0	NA	No	No	No	No
Dbx	NM_139420	0	0	NA	0	NA	No	No	No	No
s-cup	NM_136948	0	0	NA	17	80.0214	No	No	No	No
how	NM_001275893	23.3593	37.0409	1.58571	243	38.3457	Yes	Yes	Yes	No
CG9531	NM_135187	17.2073	1.33952	0.077846	119	22.132	Yes	No	Yes	No
CG9536	NM_135189	31.2398	10.6158	0.339818	501	36.6644	Yes	Yes	Yes	No
hop	NM_078564	23.6533	5.60092	0.236792	220	63.5373	Yes	Yes	Yes	No
CG6379	NM_001297922	17.8029	2.45195	0.137728	130	37.3876	Yes	No	Yes	No
ppk31	NM_001104474	0	0	NA	1	81.9632	No	No	No	No
ppk30	NM_001276147	0	0	NA	0	NA	No	No	No	No
CG1358	NM_136457	15.3581	4.94369	0.321895	135	40.3087	Yes	No	Yes	No
CG8485	NM_137098	44.989	9.94662	0.22109	364	49.2928	Yes	Yes	Yes	No
CG1354	NM_167202	151.836	34.7625	0.228947	1207	73.9883	Yes	Yes	Yes	No
CG8481	NM_001014612	31.8327	38.5474	1.21094	353	57.4156	Yes	Yes	Yes	No
smt3	NM_058063	936.257	2090.15	2.23245	2242	67.1414	Yes	Yes	Yes	No
BG642163	NM_001298675	0	0	NA	0	NA	No	No	No	No
Edg91	NM_079666	0	0	NA	0	NA	No	No	No	No
CG30091	NM_166110	0	0	NA	0	NA	No	No	No	No
CG30090	NM_166112	0.109755	0	0	0	NA	No	No	No	No
CG30095	NM_166143	0	1.66056	NA	0	NA	No	No	No	No
CG30094	NM_166149	41.1704	136.534	3.31632	175	54.4161	Yes	Yes	Yes	No
CG30096	NM_166162	18.2802	24.7008	1.35123	207	24.6592	Yes	Yes	Yes	No
eIF-1A	NM_001300457	299.149	245.763	0.821543	1529	84.3488	Yes	Yes	Yes	No
Myo10A	NM_001042804	0.357301	0.026311	0.0736382	2	90.3463	No	No	No	No
Nup43	NM_142459	57.8198	55.7992	0.965053	515	49.01	Yes	Yes	Yes	No
Spp	NM_078720	54.7186	24.0392	0.439323	302	46.6725	Yes	Yes	Yes	No
Patronin	NM_001144218	25.7005	6.54756	0.254764	293	40.3172	Yes	Yes	Yes	No
Usp8	NM_142691	25.814	12.0651	0.467387	198	42.5415	Yes	Yes	Yes	No
Usp1	NM_143430	45.6561	15.8885	0.348003	346	79.7759	Yes	Yes	Yes	No
Usp2	NM_001258871	15.6284	3.21369	0.205631	228	77.605	Yes	No	Yes	No
Usp5	NM_139516	96.3195	172.215	1.78796	542	52.5276	Yes	Yes	Yes	No
Usp7	NM_132551	73.585	138.739	1.88542	624	91.6974	Yes	Yes	Yes	No
CG17571	NM_001299167	0	0	NA	0	NA	No	No	No	No
CG17570	NM_136266	0	0	NA	2	72.5879	No	No	No	No
CG17572	NM_136097	0	0	NA	0	NA	No	No	No	No
CG17575	NM_001201988	0	0	NA	0	NA	No	No	No	No
Set1	NM_001110936	29.2649	26.1395	0.893202	201	70.0142	Yes	Yes	Yes	No
Set2	NM_132660	49.4697	2.14057	0.0432703	414	32.3487	Yes	Yes	Yes	No
Spn27A	NM_001273214	28.3043	23.0973	0.816035	95	58.5902	Yes	Yes	No	No
Mis12	NM_139809	41.4907	54.282	1.30829	500	28.4362	Yes	Yes	Yes	No
inaD	NM_001259541	0	0.245657	NA	0	NA	No	No	No	No
inaE	NM_001298302	23.5118	2.19306	0.093275	0	NA	Yes	No	No	No
Set8	NM_169577	45.9107	38.0387	0.828537	202	83.0366	Yes	Yes	Yes	No
inaC	NM_057515	0	0	NA	0	NA	No	No	No	No
CG9825	NM_137879	0	0	NA	0	NA	No	No	No	No
Pcf11	NM_137155	14.6157	21.4198	1.46553	75	64.5802	Yes	Yes	No	No
CG9826	NM_206202	0	0	NA	0	NA	No	No	No	No
CG9821	NM_001275461	382.716	183.422	0.479263	2063	56.9851	Yes	Yes	Yes	No
ATPsynbetaL	NM_140579	0	0	NA	0	NA	No	No	No	No
CG9822	NM_137737	0	0	NA	0	NA	No	No	No	No
CG44270	NM_001299176	0	0	NA	1	90.6394	No	No	No	No
CG44271	NM_001298760	0	0	NA	0	NA	No	No	No	No
Vsx1	NM_001297969	0	0	NA	1	75.9411	No	No	No	No
CG31717	NM_001273388	34.4982	154.325	4.47343	241	40.9189	Yes	Yes	Yes	No
Hil	NM_166402	1.01694	0.923585	0.908204	8	17.4971	No	No	No	No
Him	NM_133045	0	0	NA	0	NA	No	No	No	No
MRP	NM_205980	36.342	7.67872	0.21129	768	28.7592	Yes	Yes	Yes	No
Tsp68C	NM_168558	0	0	NA	0	NA	No	No	No	No
PH4alphaNE2	NM_170499	0	0	NA	0	NA	No	No	No	No
CG43131	NM_001259995	0	0	NA	0	NA	No	No	No	No
CG43133	NM_001258806	0	0	NA	0	NA	No	No	No	No
CG43134	NM_001258595	1923.41	24498.5	12.737	11707	49.3468	Yes	Yes	Yes	No
CG43135	NM_001258596	16.2104	114.507	7.06381	159	52.9936	No	Yes	Yes	No
CG43136	NM_001258609	0	0	NA	0	NA	No	No	No	No
CG43137	NM_001258610	0	0	NA	0	NA	No	No	No	No
CG43138	NM_001258634	0	0	NA	0	NA	No	No	No	No
CG43139	NM_001260409	0	0	NA	0	NA	No	No	No	No
PH4alphaNE1	NM_170495	0	0	NA	0	NA	No	No	No	No
CG42269	NM_139762	0.327285	5.85991	17.9046	4	37.2439	No	Yes	No	No
CG42268	NM_168368	0.144755	0.450744	3.11384	3	84.8899	No	No	No	No
Droj2	NM_169519	468.816	466.806	0.995714	3877	62.9471	Yes	Yes	Yes	No
CG42266	NM_001144355	0	0	NA	0	NA	No	No	No	No
CG42265	NM_001144688	0	0	NA	2	79.8396	No	No	No	No
CG42264	NM_132032	0	0	NA	0	NA	No	No	No	No
CG42263	NM_001144511	0	0	NA	0	NA	No	No	No	No
CG42261	NM_143196	0	0	NA	0	NA	No	No	No	No
CG42260	NM_137873	0	0	NA	0	NA	No	No	No	No
Plod	NM_140194	14.9526	14.2415	0.952443	121	52.7671	Yes	Yes	Yes	No
RhoGAP18B	NM_133124	10.2873	8.03535	0.781096	204	70.354	Yes	Yes	Yes	No
CG5348	NM_001259446	0	0	NA	0	NA	No	No	No	No
Trs23	NM_135403	36.2632	31.5846	0.870982	109	57.0697	Yes	Yes	Yes	No
whip	NM_001103760	0	0	NA	0	NA	No	No	No	No
rt	NM_079301	28.8536	2.17586	0.0754104	319	24.5488	Yes	No	Yes	No
ru	NM_080051	0.185775	0	0	0	NA	No	No	No	No
dsx	NM_001300291	0.0734668	0.400337	5.44922	1	11.8321	No	No	No	No
CSN5	NM_058094	101.723	162.115	1.59369	739	51.7346	Yes	Yes	Yes	No
CG5506	NM_140764	0	0	NA	0	NA	No	No	No	No
ry	NM_079613	0	0	NA	0	NA	No	No	No	No
CG5500	NM_143254	47.1262	0	0	293	49.9405	Yes	No	Yes	No
smo	NM_078719	17.4149	3.55059	0.203883	397	44.1602	Yes	Yes	Yes	No
CG31388	NM_001260113	5.64152	4.64704	0.82372	43	73.4138	No	No	No	No
CSN7	NM_136535	69.6926	341.794	4.9043	396	50.8298	Yes	Yes	Yes	No
rb	NM_080332	53.2909	33.4572	0.627822	286	82.1442	Yes	Yes	Yes	No
smg	NM_001144452	331.62	66.8728	0.201655	4873	59.1935	Yes	Yes	Yes	No
rn	NM_001275414	0	0	NA	0	NA	No	No	No	No
Spred	NM_001274050	28.9985	3.10805	0.107179	370	52.7569	Yes	No	Yes	No
dsb	NM_001104007	0.0504216	0.137379	2.72461	0	NA	No	No	No	No
rk	NM_057354	0	0	NA	0	NA	No	No	No	No
CG42402	NM_001276243	0.0418937	0	0	0	NA	No	No	No	No
Su(z)12	NM_143802	55.4101	12.4583	0.224838	349	63.8185	Yes	Yes	Yes	No
CG42404	NM_001043248	0	0	NA	0	NA	No	No	No	No
CG5342	NM_141831	0	0	NA	0	NA	No	No	No	No
Egm	NM_136843	22.5918	10.0388	0.444357	99	29.769	Yes	Yes	No	No
Mst57Dc	NM_079774	0	0	NA	0	NA	No	No	No	No
Mst57Db	NM_079775	0	0	NA	0	NA	No	No	No	No
Mst57Da	NM_080167	0	0	NA	0	NA	No	No	No	No
wfs1	NM_142822	17.1427	4.71989	0.275329	119	35.5836	Yes	Yes	Yes	No
CG6974	NM_142157	0	0	NA	0	NA	No	No	No	No
CG6972	NM_001316516	0	0.587415	NA	0	NA	No	No	No	No
FMRFa	NM_078945	0	0	NA	0	NA	No	No	No	No
CG6971	NM_141871	0	0	NA	1	57.6974	No	No	No	No
ato	NM_169213	0	0	NA	0	NA	No	No	No	No
Vinc	NM_001297885	44.3061	107.391	2.42384	241	51.8683	Yes	Yes	Yes	No
atk	NM_140971	0	0	NA	0	NA	No	No	No	No
CG6978	NM_131960	0	0.177703	NA	0	NA	No	No	No	No
CG14174	NM_140094	12.9511	6.46097	0.498873	51	49.6628	Yes	No	No	No
rnh1	NM_057967	50.6618	28.5408	0.56336	135	81.8103	Yes	Yes	Yes	No
Xbp1	NM_079983	73.0243	38.1534	0.522475	363	53.1402	Yes	Yes	Yes	No
CG18659	NM_001259289	31.1222	11.139	0.357913	319	48.7168	Yes	Yes	Yes	No
mus101	NM_080170	30.3194	48.8407	1.61087	349	30.9225	Yes	Yes	Yes	No
CG15225	NM_137672	0	0	NA	0	NA	No	No	No	No
CG18304	NM_001273241	0.0480859	0.0436718	0.908204	1	10.2064	No	No	No	No
CG18870	NM_001299755	27.9166	5.41458	0.193955	627	57.2013	Yes	No	Yes	No
CG15553	NM_143584	0	0	NA	0	NA	No	No	No	No
CG16753	NM_139507	55.4437	31.1311	0.561491	482	53.912	Yes	Yes	Yes	No
alpha-PheRS	NM_132220	79.8818	149.878	1.87624	467	63.8138	Yes	Yes	Yes	No
wash	NM_001299405	55.8953	48.2091	0.862489	323	56.0507	Yes	Yes	Yes	No
Galphao	NM_206079	18.2209	16.5483	0.908204	180	50.2451	Yes	Yes	Yes	No
ArfGAP3	NM_141152	58.26	65.2444	1.11988	373	76.0251	Yes	Yes	Yes	No
ArfGAP1	NM_079316	63.6009	77.3606	1.21634	648	66.2982	Yes	Yes	Yes	No
Sfp84E	NM_001170073	0	0	NA	0	NA	No	No	No	No
CG11426	NM_141137	0.465868	4.82338	10.3535	7	79.2206	No	No	No	No
CG33342	NM_001104434	0	0	NA	0	NA	No	No	No	No
Rala	NM_080324	197.621	164.82	0.834019	1287	61.6894	Yes	Yes	Yes	No
Mal-B2	NM_001201862	18.7929	40.242	2.14134	79	59.5496	Yes	Yes	No	No
DCTN6-p27	NM_136105	39.6183	88.9812	2.24596	241	60.1262	Yes	Yes	Yes	No
CG13689	NM_001272910	26.4291	28.4687	1.07717	225	47.2106	No	No	Yes	No
Cen	NM_136205	86.6773	59.4392	0.685753	403	72.5807	Yes	Yes	Yes	No
REPTOR-BP	NM_164904	32.4054	94.5987	2.91923	192	43.6462	No	Yes	Yes	No
Prp31	NM_140499	46.512	86.0116	1.84923	317	54.0361	Yes	Yes	Yes	No
CG31960	NM_164559	0	0	NA	0	NA	No	No	No	No
CG31961	NM_164571	46.2195	165.481	3.58032	145	50.77	Yes	Yes	Yes	No
Ilp3	NM_140103	0	0	NA	0	NA	No	No	No	No
Sucb	NM_143706	41.4415	12.7514	0.307698	496	22.0114	Yes	Yes	Yes	No
xit	NM_132127	12.4456	5.31915	0.42739	63	73.745	Yes	No	No	No
CG4908	NM_164892	21.9733	18.2381	0.830014	48	50.0109	Yes	Yes	No	No
CG3597	NM_001273001	0	0	NA	3	55.3269	No	No	No	No
CG3224	NM_132107	79.5064	57.954	0.728922	320	43.578	Yes	Yes	Yes	No
CG4907	NM_142829	0	0	NA	0	NA	No	No	No	No
CG3226	NM_132104	372.078	1049.88	2.82166	1293	44.8894	Yes	Yes	Yes	No
CG4901	NM_135512	65.0421	37.1422	0.571049	225	71.7063	Yes	Yes	Yes	No
CG3223	NM_141501	42.8317	71.3395	1.66558	325	50.5871	Yes	Yes	Yes	No
CG32376	NM_168223	0	0	NA	0	NA	No	No	No	No
Ilp6	NM_130644	2.31608	0	0	3	66.7252	No	No	No	No
CG42470	NM_001169482	0	0	NA	0	NA	No	No	No	No
Cyp4d21	NM_135285	0	0	NA	0	NA	No	No	No	No
CG33521	NM_001014702	0.0477147	0.260008	5.44922	1	-8.23499	No	No	No	No
Ilp4	NM_140104	0	0	NA	0	NA	No	No	No	No
knk	NM_141724	0.0448802	0	0	0	NA	No	No	No	No
CG14795	NM_130569	0.301189	0	0	1	81.4919	No	No	No	No
CG14797	NM_001258539	0	0	NA	0	NA	No	No	No	No
trem	NM_142604	36.6915	12.8366	0.349853	176	44.658	Yes	Yes	Yes	No
CG14798	NM_130582	1.25623	0	0	6	25.3976	No	No	No	No
CG43815	NM_001273070	0	0	NA	0	NA	No	No	No	No
CG10086	NM_141479	0	0.181623	NA	0	NA	No	No	No	No
CG10081	NM_137574	0	0	NA	0	NA	No	No	No	No
CG10082	NM_166466	13.8425	36.3219	2.62395	68	67.2991	Yes	Yes	No	No
Usp16-45	NM_001297961	90.1681	152.016	1.68592	623	65.5937	Yes	Yes	Yes	No
CG3040	NM_132144	35.7467	51.8457	1.45036	477	54.7604	Yes	Yes	Yes	No
CG3045	NM_137802	31.8241	31.5148	0.990281	214	42.8924	Yes	Yes	Yes	No
CG10089	NM_001274874	0.210181	0.381774	1.81641	0	NA	No	No	No	No
Mo25	NM_079393	55.9836	90.6544	1.6193	321	45.9826	Yes	Yes	Yes	No
RpII18	NM_080171	95.1123	78.5285	0.82564	357	53.0553	Yes	Yes	Yes	No
RpII15	NM_001300397	85.5918	65.3844	0.76391	489	60.2955	Yes	Yes	Yes	No
CG12025	NM_001299978	37.0073	2.66747	0.0720797	428	54.4676	Yes	No	Yes	No
CG12795	NM_001103604	128.729	178.664	1.38791	938	35.1079	Yes	Yes	Yes	No
cv-2	NM_080070	0.123288	0.671825	5.44922	3	68.5769	No	No	No	No
Asx	NM_001274041	16.1584	2.5961	0.160665	322	37.3819	Yes	Yes	Yes	No
ph-d	NM_001103395	5.08405	9.56159	1.88071	146	61.6188	Yes	Yes	Yes	No
Cpr47Ef	NM_136816	0.0506752	0	0	0	NA	No	No	No	No
Cpr47Eg	NM_136817	0	0	NA	0	NA	No	No	No	No
Cpr47Ed	NM_136814	0	0	NA	0	NA	No	No	No	No
Cpr47Ee	NM_136815	0.0855264	0.233026	2.72461	0	NA	No	No	No	No
Cpr47Eb	NM_136811	0	0	NA	0	NA	No	No	No	No
Cpr47Ec	NM_136813	0	0	NA	0	NA	No	No	No	No
CG10338	NM_001299127	20.255	4.92374	0.243088	232	62.4324	Yes	No	Yes	No
CG10339	NM_138037	0	0	NA	0	NA	No	No	No	No
CG10336	NM_136051	103.002	24.5877	0.238712	524	50.9019	Yes	Yes	Yes	No
CG10337	NM_136142	0.676552	0.737337	1.08984	4	49.8896	No	No	No	No
ph-p	NM_001297874	0.477028	0.557021	1.16769	0	NA	No	No	No	No
CG10333	NM_136044	35.5661	69.8443	1.96379	85	50.9828	Yes	Yes	No	No
CkIIbeta	NM_080762	178.89	351.511	1.96495	370	66.8701	Yes	Yes	Yes	No
CG12605	NM_001274458	0	0	NA	2	79.273	No	No	No	No
Sgs8	NM_057371	0	0	NA	0	NA	No	No	No	No
Sgs7	NM_057370	0	0	NA	0	NA	No	No	No	No
Sgs5	NM_079664	0	0	NA	0	NA	No	No	No	No
Sgs4	NM_057369	0	0	NA	0	NA	No	No	No	No
Sgs3	NM_079300	0	0	NA	0	NA	No	No	No	No
Sgs1	NM_078751	0	0	NA	0	NA	No	No	No	No
hui	NM_166071	0	0	NA	0	NA	No	No	No	No
CG12241	NM_142175	24.7632	8.45989	0.341631	184	43.2009	Yes	Yes	Yes	No
CG1503	NM_001298582	9.43922	28.5444	3.02402	96	44.4841	No	Yes	No	No
CG8814	NM_134885	52.4346	8.54514	0.162967	273	31.8925	Yes	No	Yes	No
CG8813	NM_134883	0.450474	0	0	0	NA	No	No	No	No
CG1504	NM_001272814	0	0	NA	0	NA	No	No	No	No
Keap1	NM_142337	4.48104	4.06969	0.908204	32	39.336	No	No	No	No
Pkcdelta	NM_132569	0.0160884	0	0	0	NA	No	No	No	No
Eip93F	NM_001275888	0.927975	3.37116	3.63282	5	39.7352	No	Yes	No	No
RpL18A	NM_079050	2645.19	412.36	0.155891	17996	56.1979	Yes	Yes	Yes	No
CG8818	NM_136950	36.117	12.5496	0.347471	345	63.692	Yes	Yes	Yes	No
CG2316	NM_166736	82.324	22.0152	0.267421	1063	36.1683	Yes	Yes	Yes	No
CG7766	NM_001258659	42.3686	10.3048	0.243217	336	37.2453	Yes	Yes	Yes	No
Ctr1A	NM_132108	21.8926	50.4722	2.30544	276	42.4746	Yes	Yes	Yes	No
CG2310	NM_170411	32.7447	14.3446	0.438075	399	32.8603	Yes	Yes	Yes	No
cv-c	NM_001104316	0.970504	6.38145	6.5754	35	60.3094	No	Yes	No	No
Tgi	NM_168555	19.2605	20.6104	1.07009	411	24.5827	Yes	Yes	Yes	No
ste24b	NM_137330	0.280241	0	0	4	59.3878	No	No	No	No
ste24a	NM_137331	63.655	356.138	5.59481	372	52.391	Yes	Yes	Yes	No
CG6415	NM_135597	0	0	NA	1	79.6178	No	No	No	No
CG6414	NM_001316636	0	0	NA	0	NA	No	No	No	No
CG7839	NM_140174	60.1865	44.8524	0.745223	239	64.0414	Yes	Yes	Yes	No
CG6412	NM_136003	81.2623	42.7566	0.526155	638	62.3119	Yes	Yes	Yes	No
CG7834	NM_170428	163.745	415.958	2.54029	2705	88.7827	Yes	Yes	Yes	No
CG7837	NM_143469	35.9104	62.3956	1.73754	214	57.1626	Yes	Yes	Yes	No
CG6418	NM_140156	35.5071	22.938	0.646011	334	46.6084	Yes	Yes	Yes	No
CG10671	NM_168110	35.1438	39.5425	1.12516	440	59.7256	Yes	Yes	Yes	No
CHOp24	NM_001297933	90.1866	143.41	1.59015	734	44.3016	Yes	Yes	Yes	No
CG5697	NM_142675	0	0	NA	0	NA	No	No	No	No
CG5694	NM_164894	75.7308	23.5891	0.311486	575	44.3502	Yes	Yes	Yes	No
Hr38	NM_057771	0	0	NA	0	NA	No	No	No	No
CG5693	NM_144325	0	0	NA	0	NA	No	No	No	No
HIPP1	NM_141004	79.5042	16.7325	0.210461	518	58.8312	Yes	Yes	Yes	No
Rcd5	NM_139595	77.5994	47.2931	0.609453	659	49.9574	Yes	Yes	Yes	No
Rcd4	NM_135377	53.241	114.522	2.15101	431	49.978	Yes	Yes	Yes	No
Rcd7	NM_168803	0	0	NA	0	NA	No	No	No	No
Rcd6	NM_001169746	0.303814	0.165555	0.544922	2	54.4272	No	No	No	No
Rcd1	NM_001274034	55.8958	56.6213	1.01298	1011	56.1252	Yes	Yes	Yes	No
CG32809	NM_001272208	3.47452	0.20142	0.0579705	44	71.7977	Yes	No	No	No
Rcd2	NM_140987	0.346287	5.66099	16.3477	0	NA	No	No	No	No
Sp212	NM_206487	0.0603984	0	0	0	NA	No	No	No	No
CG32806	NM_166904	0	0	NA	0	NA	No	No	No	No
CG32801	NM_166913	0	0	NA	0	NA	No	No	No	No
CG32803	NM_001272221	53.2732	29.4663	0.553117	190	66.9873	Yes	Yes	Yes	No
CheB38a	NM_206014	0	0	NA	0	NA	No	No	No	No
CheB38b	NM_206013	0	0	NA	0	NA	No	No	No	No
CheB38c	NM_136217	0	0	NA	0	NA	No	No	No	No
Chmp1	NM_001300179	50.491	170.972	3.38618	372	63.2483	Yes	Yes	Yes	No
CG9186	NM_138253	42.7358	37.3055	0.872934	252	60.9513	Yes	Yes	Yes	No
CG18449	NM_136530	0	0	NA	0	NA	No	No	No	No
godzilla	NM_169139	38.563	26.4256	0.685256	290	71.3304	Yes	Yes	Yes	No
Acox57D-p	NM_079078	42.6787	6.47399	0.151691	242	38.577	Yes	Yes	Yes	No
pxb	NM_001275680	0	0	NA	1	76.3245	No	No	No	No
TTLL3B	NM_135224	0	0	NA	0	NA	No	No	No	No
NetA	NM_001298314	0.34034	3.24553	9.53614	1	3.55333	No	No	No	No
CG13045	NM_140607	0	0	NA	0	NA	No	No	No	No
CG13044	NM_140610	0	0	NA	0	NA	No	No	No	No
CG13047	NM_140605	0	0	NA	0	NA	No	No	No	No
CG13046	NM_140606	0	0	NA	0	NA	No	No	No	No
CG13041	NM_140615	0	0	NA	0	NA	No	No	No	No
CG13043	NM_140611	0	0	NA	0	NA	No	No	No	No
CG13042	NM_140613	0	0	NA	0	NA	No	No	No	No
Rpt6R	NM_143554	0	0.214789	NA	2	8.44852	No	No	No	No
CG13049	NM_168657	0	0	NA	0	NA	No	No	No	No
CG13048	NM_001275006	0	0	NA	0	NA	No	No	No	No
fd102C	NM_143694	0.103609	0	0	0	NA	No	No	No	No
Neto	NM_001298282	0	0	NA	1	45.2498	No	No	No	No
CG30375	NM_165600	0	0	NA	0	NA	No	No	No	No
CG30376	NM_165599	0	0	NA	0	NA	No	No	No	No
CG30377	NM_001299242	48.4149	5.97901	0.123495	295	93.1052	Yes	Yes	Yes	No
Nmd3	NM_057984	37.1363	41.3852	1.11441	300	42.528	Yes	Yes	Yes	No
CG30371	NM_136526	0	0	NA	0	NA	No	No	No	No
CG30373	NM_001299260	38.4288	46.2778	1.20425	203	36.2656	Yes	Yes	Yes	No
CG30379	NM_165574	0	0	NA	0	NA	No	No	No	No
Socs44A	NM_078935	29.4476	3.53229	0.119951	119	57.862	Yes	No	Yes	No
Rim	NM_001260239	0.0108611	0	0	0	NA	No	No	No	No
Ric	NM_057863	27.5016	3.6471	0.132614	300	46.5193	Yes	No	Yes	No
Irk1	NM_001202341	18.2123	38.9434	2.1383	281	70.0104	Yes	Yes	Yes	No
Irk2	NM_001300556	0	0	NA	0	NA	No	No	No	No
Irk3	NM_001144363	0	0	NA	0	NA	No	No	No	No
Deaf1	NM_001275140	43.5223	4.70211	0.108039	206	48.1694	Yes	No	Yes	No
CG8673	NM_135338	0.0747387	0	0	0	NA	No	No	No	No
CG12576	NM_001272844	49.1777	55.9263	1.13723	882	59.2675	Yes	Yes	Yes	No
CG8671	NM_001299195	35.7907	11.4251	0.31922	319	68.6423	Yes	Yes	Yes	No
CG13309	NM_140005	0	0	NA	0	NA	No	No	No	No
CG8677	NM_001299194	46.8244	12.9071	0.275649	273	43.7307	Yes	Yes	Yes	No
CG8675	NM_132981	69.343	38.4653	0.554711	124	55.5218	Yes	Yes	Yes	No
CG13300	NM_139786	0	0	NA	0	NA	No	No	No	No
CG13306	NM_144187	0	0	NA	0	NA	No	No	No	No
CG13305	NM_001144441	0	0	NA	0	NA	No	No	No	No
CG34045	NM_001038872	0	0	NA	0	NA	No	No	No	No
CG40635	NM_001110696	0	0	NA	0	NA	No	No	No	No
Ate1	NM_001274172	58.5929	12.6311	0.215574	514	66.3375	Yes	Yes	Yes	No
CG43677	NM_001274180	0	0	NA	0	NA	No	No	No	No
Aats-thr	NM_001298939	104.707	292.266	2.79128	864	58.3342	Yes	Yes	Yes	No
CG43851	NM_001273019	0	0	NA	0	NA	No	No	No	No
wts	NM_170524	47.687	15.4947	0.324925	437	73.6155	Yes	Yes	Yes	No
CG31777	NM_164550	2.59023	0	0	2	95.4493	No	No	No	No
CG31776	NM_164538	0	0	NA	0	NA	No	No	No	No
CG5991	NM_142951	84.843	113.769	1.34093	1379	63.7176	Yes	Yes	Yes	No
CG31778	NM_164549	0	0	NA	0	NA	No	No	No	No
CG43679	NM_001274926	0	0	NA	0	NA	No	No	No	No
CG43678	NM_001274925	0	0	NA	2	91.4699	No	No	No	No
CG4022	NM_001259768	25.5672	0.319544	0.0124982	404	27.9287	Yes	No	Yes	No
CG4020	NM_001272335	4.92775	1.89344	0.38424	25	50.7433	No	No	No	No
CG4021	NM_137766	0.0996242	0	0	0	NA	No	No	No	No
CG4025	NM_130623	11.4142	21.8053	1.91036	96	46.4878	No	Yes	No	No
CG42671	NM_001300099	21.3809	4.66307	0.218095	322	61.2643	Yes	Yes	Yes	No
CG42672	NM_137730	14.0833	9.93506	0.705448	98	69.902	Yes	Yes	No	No
CG42673	NM_168353	0	0.0926859	NA	4	74.7205	No	No	No	No
CG42674	NM_140925	9.77108	2.20185	0.225344	0	NA	Yes	Yes	No	No
CG42675	NM_001202252	0.0822668	0.44829	5.44922	0	NA	No	No	No	No
CG42676	NM_001299976	17.1178	5.60472	0.327421	174	40.5436	Yes	No	Yes	No
Nop56	NM_142783	174.899	287.976	1.64653	1304	43.0379	Yes	Yes	Yes	No
Cdk12	NM_141068	58.0645	8.07969	0.13915	527	35.981	Yes	Yes	Yes	No
pita	NM_166607	75.4322	71.9875	0.954333	574	58.0023	Yes	Yes	Yes	No
Prestin	NM_140767	31.5368	3.51411	0.111429	250	41.9582	Yes	No	Yes	No
Vha14-1	NM_057621	157.605	361.771	2.29543	965	56.1614	Yes	Yes	Yes	No
Vha14-2	NM_001260015	0	0	NA	0	NA	No	No	No	No
Prp18	NM_142519	41.1828	45.1875	1.09724	182	51.4256	Yes	Yes	Yes	No
Prp19	NM_079059	90.7197	234.725	2.58736	570	60.5578	Yes	Yes	Yes	No
LManIII	NM_001298833	0	0	NA	0	NA	No	No	No	No
CG3698	NM_141000	0	0	NA	0	NA	No	No	No	No
CG3699	NM_130519	0	0.349869	NA	0	NA	No	No	No	No
CG14540	NM_143194	0	0	NA	0	NA	No	No	No	No
CG14543	NM_143201	61.6744	61.0633	0.990091	250	48.8214	Yes	Yes	Yes	No
CG3690	NM_001297835	0	0	NA	0	NA	No	No	No	No
CG14096	NM_140856	0	0	NA	0	NA	No	No	No	No
CG14095	NM_140855	0	0	NA	0	NA	No	No	No	No
CG14546	NM_143191	0	0	NA	0	NA	No	No	No	No
CG10659	NM_136174	0	0	NA	0	NA	No	No	No	No
CG18467	NM_137367	0	0	NA	0	NA	No	No	No	No
CG10651	NM_001299166	0.100619	0	0	0	NA	No	No	No	No
CG10650	NM_001299152	0.0738257	1.00573	13.6231	0	NA	No	No	No	No
CG10654	NM_001274838	0.991214	0	0	4	61.333	No	No	No	No
CG10657	NM_140322	0	0.517294	NA	0	NA	No	No	No	No
CG18469	NM_137357	0	0	NA	0	NA	No	No	No	No
Pk34A	NM_135759	0	0	NA	0	NA	No	No	No	No
fru	NM_001275783	0.0348819	0.0950396	2.72461	3	42.7414	No	No	No	No
fry	NM_001259770	13.377	24.6961	1.84616	191	51.4767	Yes	Yes	Yes	No
CG12877	NM_001038984	42.2306	2.61697	0.0619684	234	58.0907	Yes	No	Yes	No
Calr	NM_001275501	562.761	802.617	1.42621	2833	62.4908	Yes	Yes	Yes	No
Lrt	NM_001299711	0.111328	0	0	1	-0.214511	No	No	No	No
CG14893	NM_142311	0	0	NA	0	NA	No	No	No	No
CG14892	NM_142305	0	0	NA	0	NA	No	No	No	No
CG14327	NM_001300448	0	0	NA	0	NA	No	No	No	No
CG14326	NM_142382	0	0	NA	0	NA	No	No	No	No
CG14321	NM_142393	0.286892	0	0	0	NA	No	No	No	No
CG14323	NM_169767	0	0	NA	0	NA	No	No	No	No
CG14322	NM_001300450	15.2129	4.95703	0.325844	167	81.1101	Yes	Yes	Yes	No
lectin-22C	NM_001144294	0	0	NA	0	NA	No	No	No	No
CG14329	NM_142379	0	0	NA	0	NA	No	No	No	No
Sulf1	NM_001275697	13.5643	2.099	0.154745	130	54.9342	Yes	No	Yes	No
CG5205	NM_142215	12.6743	3.22911	0.254777	155	48.5466	Yes	Yes	Yes	No
stwl	NM_001274910	19.4394	6.04621	0.311029	244	42.8929	Yes	Yes	Yes	No
heph	NM_001170322	53.6144	91.6084	1.70865	300	73.1704	Yes	Yes	Yes	No
spin	NM_080084	32.8592	33.1041	1.00745	467	37.7308	Yes	Yes	Yes	No
CG7220	NM_001299364	62.7499	40.1447	0.639757	757	56.2495	Yes	Yes	Yes	No
CG7222	NM_136769	46.4463	90.0187	1.93813	339	69.9588	Yes	Yes	Yes	No
CG7227	NM_001298804	0.120316	0	0	0	NA	No	No	No	No
CG34245	NM_001202178	0	0	NA	0	NA	No	No	No	No
Cyp317a1	NM_001299507	0.240632	4.5894	19.0723	19	65.8645	No	No	No	No
CG14877	NM_142250	0	0	NA	0	NA	No	No	No	No
Tsp96F	NM_001276048	26.7064	8.15746	0.30545	376	52.1549	Yes	No	Yes	No
Ku80	NM_135923	21.6252	12.6516	0.585039	202	26.5937	Yes	Yes	Yes	No
CG4440	NM_001273568	0	0	NA	0	NA	No	No	No	No
Ppn	NM_176575	0.0209687	0.257092	12.2608	0	NA	No	No	No	No
CG13228	NM_136801	0	0	NA	0	NA	No	No	No	No
Ahcy89E	NM_206499	0.123765	0	0	0	NA	No	No	No	No
RpL35	NM_167043	2531.38	573.795	0.226672	27945	57.2836	Yes	Yes	Yes	No
mms4	NM_136767	40.487	102.171	2.52356	250	35.5599	Yes	Yes	Yes	No
CG32024	NM_168296	0	0	NA	0	NA	No	No	No	No
CG32022	NM_001300058	42.4436	184.622	4.34982	176	58.3362	Yes	Yes	Yes	No
CG32023	NM_168295	0	0	NA	0	NA	No	No	No	No
CG7593	NM_143458	69.5747	163.494	2.3499	451	52.7621	Yes	Yes	Yes	No
CG2070	NM_001273857	0	0	NA	0	NA	No	No	No	No
Khc-73	NM_001274070	16.9594	7.87536	0.464364	433	24.1877	Yes	Yes	Yes	No
Cad87A	NM_169440	15.778	22.44	1.42223	182	39.7875	Yes	Yes	Yes	No
Or13a	NM_078635	0	0	NA	0	NA	No	No	No	No
HBS1	NM_001299977	32.6978	31.4579	0.96208	199	58.3314	Yes	Yes	Yes	No
CG15056	NM_133063	0	0	NA	0	NA	No	No	No	No
topi	NM_141688	0.075706	0	0	0	NA	No	No	No	No
CG15059	NM_167611	0	0	NA	0	NA	No	No	No	No
CG11210	NM_136507	19.853	19.358	0.975066	410	23.6594	Yes	Yes	Yes	No
CG11211	NM_136364	0	0	NA	0	NA	No	No	No	No
GABA-B-R2	NM_001300527	0	0	NA	0	NA	No	No	No	No
GABA-B-R3	NM_164387	0.0937518	0	0	0	NA	No	No	No	No
CG5783	NM_136025	0	0.303449	NA	0	NA	No	No	No	No
cindr	NM_001276200	53.4608	19.9315	0.372824	285	64.7905	Yes	Yes	Yes	No
CG9331	NM_001299178	19.9534	42.3104	2.12046	33	50.9754	Yes	Yes	No	No
CG9330	NM_140872	86.1622	64.8143	0.752236	306	85.7564	Yes	Yes	Yes	No
CG12499	NM_142787	39.3985	94.0483	2.3871	377	96.1262	Yes	Yes	Yes	No
l(2)03659	NM_136638	3.87104	5.39477	1.39362	31	71.568	Yes	Yes	No	No
CG6178	NM_142964	92.0307	136.049	1.4783	545	59.0034	Yes	Yes	Yes	No
CG9336	NM_136225	73.9879	825.641	11.1591	1041	72.3362	Yes	Yes	Yes	No
CG9338	NM_001273717	2.76116	31.3462	11.3525	15	58.1985	No	Yes	No	No
CG6175	NM_001274779	37.4101	2.0832	0.0556855	414	41.4536	Yes	No	Yes	No
CG12490	NM_137878	0.0652216	0	0	0	NA	No	No	No	No
CG12493	NM_139670	0	0	NA	0	NA	No	No	No	No
CG6171	NM_142198	61.9085	48.056	0.776243	117	42.7697	Yes	Yes	Yes	No
Daxx	NM_135191	38.3044	8.4173	0.219748	667	82.8055	Yes	Yes	Yes	No
CG16798	NM_136186	0	0	NA	0	NA	No	No	No	No
CG16799	NM_001299712	0.370033	1.0082	2.72461	0	NA	No	No	No	No
CG8319	NM_141663	50.3473	14.1211	0.280475	164	63.3881	Yes	Yes	Yes	No
CG16978	NM_144312	0	0	NA	0	NA	No	No	No	No
CG16979	NM_140522	31.8887	29.1007	0.91257	235	51.2424	Yes	Yes	Yes	No
CG8314	NM_137226	39.6629	5.93769	0.149704	177	65.2799	Yes	No	Yes	No
CG16790	NM_141654	15.9618	31.9377	2.00089	133	46.6677	Yes	Yes	Yes	No
CG16791	NM_142710	0.276649	2.41204	8.71876	4	63.0516	No	No	No	No
CG16972	NM_135768	20.0293	5.92858	0.295995	190	54.5934	Yes	Yes	Yes	No
CG8311	NM_137295	42.6626	3.54799	0.083164	372	35.4895	Yes	No	Yes	No
CG8312	NM_141661	23.6685	14.9115	0.630015	346	41.0183	Yes	Yes	Yes	No
Vps39	NM_142445	21.8478	29.8591	1.36669	176	87.5146	Yes	Yes	Yes	No
ImpL3	NM_001274545	0.09553	0.780847	8.17384	3	46.7813	No	No	No	No
Cnot4	NM_001273414	91.3511	116.933	1.28004	474	64.5223	Yes	Yes	Yes	No
Sox100B	NM_143582	0	0	NA	0	NA	No	No	No	No
CG31100	NM_169249	0	0.3527	NA	1	137.904	No	No	No	No
ham	NM_001273614	0.0620308	0.676039	10.8984	3	43.4821	No	No	No	No
Drs	NM_079177	0	0	NA	1	-4.56278	No	No	No	No
Uvrag	NM_135788	13.2367	3.50967	0.265147	186	56.1291	Yes	No	Yes	No
Ent3	NM_001300123	0.046325	0	0	0	NA	No	No	No	No
haf	NM_001272946	0	0	NA	0	NA	No	No	No	No
bnk	NM_079865	0	0	NA	0	NA	No	No	No	No
E(spl)mgamma-HLH	NM_079780	0	0	NA	0	NA	No	No	No	No
CG31103	NM_001104444	0	0	NA	0	NA	No	No	No	No
bnl	NM_001144611	0	0.110617	NA	0	NA	No	No	No	No
bnb	NM_167634	0	0.386251	NA	2	23.9477	No	No	No	No
CG6310	NM_140172	4.26024	12.5361	2.94258	5	54.6279	No	No	No	No
east	NM_001258556	69.8868	26.5448	0.379825	730	54.1369	Yes	Yes	Yes	No
Spase22-23	NM_001260350	106.014	434.028	4.09405	1140	52.6548	Yes	Yes	Yes	No
CG1339	NM_136463	0	0	NA	1	21.7442	No	No	No	No
Lgr4	NM_001103496	0	0	NA	0	NA	No	No	No	No
Lgr1	NM_169777	0.0741275	0	0	0	NA	No	No	No	No
Lgr3	NM_170236	0	0	NA	0	NA	No	No	No	No
MESK2	NM_206192	41.0794	26.4902	0.644853	1	102.038	Yes	Yes	No	No
calypso	NM_137252	31.6573	4.52064	0.142799	185	65.9708	Yes	No	Yes	No
CG3909	NM_141712	46.7665	22.9775	0.491323	278	40.8859	Yes	Yes	Yes	No
Nup98-96	NM_142930	70.8882	46.8354	0.660693	388	58.1246	Yes	Yes	Yes	No
CG17778	NM_001297812	0	0	NA	0	NA	No	No	No	No
CG17777	NM_001297879	0.320346	0	0	1	31.5888	No	No	No	No
CG17776	NM_001297878	112.349	74.2539	0.660921	916	58.5313	Yes	Yes	Yes	No
St4	NM_001299469	0	0.249251	NA	0	NA	No	No	No	No
CG32006	NM_166734	0	0	NA	0	NA	No	No	No	No
GstD7	NM_080375	0	0	NA	1	56.216	No	No	No	No
GstD6	NM_080176	0.151602	0	0	0	NA	No	No	No	No
GstD5	NM_080175	0.30169	0	0	0	NA	No	No	No	No
GstD4	NM_080174	0.151602	0	0	0	NA	No	No	No	No
Cpsf100	NM_143401	41.3492	31.2513	0.755791	135	59.3247	Yes	Yes	Yes	No
GstD2	NM_080173	2.42563	5.36973	2.21375	23	48.2326	No	No	No	No
GstD1	NM_001038953	1308.76	3662.96	2.7988	9124	43.5696	Yes	Yes	Yes	No
CG32000	NM_001103379	27.2016	8.203	0.301563	267	52.8674	Yes	Yes	Yes	No
Atac2	NM_136045	11.7557	4.66872	0.397147	81	48.3885	Yes	Yes	No	No
Atac3	NM_167828	22.3814	19.5432	0.873189	209	50.2224	Yes	Yes	Yes	No
Acp98AB	NM_001276097	0	0	NA	0	NA	No	No	No	No
GstD9	NM_001300374	44.9556	159.924	3.55738	299	60.1383	Yes	Yes	Yes	No
GstD8	NM_080177	0.307837	0	0	0	NA	No	No	No	No
Gs1	NM_164367	157.272	126.081	0.801678	2132	36.4017	Yes	Yes	Yes	No
RASSF8	NM_143154	36.8458	27.9868	0.759566	76	76.6762	Yes	Yes	No	No
Gs2	NM_001298194	0	7.22381	NA	2	2.15041	No	No	No	No
NHP2	NM_001274920	128.973	331.435	2.5698	616	32.4479	Yes	Yes	Yes	No
MP1	NM_001316492	0.864907	7.28384	8.42153	13	51.2426	No	No	No	No
CG42685	NM_135873	0	0	NA	0	NA	No	No	No	No
CG17514	NM_001015316	42.156	22.8962	0.543129	619	70.0514	Yes	Yes	Yes	No
ade5	NM_001272564	68.6714	39.3375	0.572837	1013	30.0246	Yes	Yes	Yes	No
for	NM_058139	74.2567	28.7933	0.387753	871	77.8603	Yes	Yes	Yes	No
ade3	NM_001298769	17.4447	12.4982	0.716446	145	28.3031	Yes	Yes	Yes	No
CG9806	NM_132415	0	0	NA	0	NA	No	No	No	No
CG9804	NM_141215	33.0798	7.91933	0.239401	173	29.2845	Yes	No	Yes	No
Ugt86Dc	NM_144368	0	0.651736	NA	0	NA	No	No	No	No
CG9801	NM_141570	4.66366	2.25632	0.48381	63	64.1012	No	No	No	No
soti	NM_142101	0	0	NA	0	NA	No	No	No	No
CG32457	NM_168982	0	0	NA	0	NA	No	No	No	No
fog	NM_001272855	21.9982	19.8252	0.901218	257	72.1694	Yes	Yes	Yes	No
Ef1gamma	NM_001202379	980.139	528.509	0.539219	6960	84.0128	Yes	Yes	Yes	No
CG42688	NM_001273635	0	0	NA	1	72.2209	No	No	No	No
fon	NM_136115	0.10767	0.293358	2.72461	0	NA	No	No	No	No
CG5913	NM_143182	84.1775	82.649	0.981842	370	56.7581	Yes	Yes	Yes	No
foi	NM_001300056	46.3139	3.9359	0.0849832	594	37.9704	Yes	No	Yes	No
fok	NM_001201926	176.783	406.836	2.30133	1059	64.7663	Yes	Yes	Yes	No
Mitofilin	NM_079720	64.1708	67.9556	1.05898	427	73.6787	Yes	Yes	Yes	No
CG9759	NM_001300386	0	0	NA	0	NA	No	No	No	No
CG32452	NM_001300219	34.856	20.0556	0.575384	185	67.8035	Yes	Yes	Yes	No
CG6495	NM_135607	0.137499	0.124878	0.908204	1	67.0306	No	No	No	No
Gsc	NM_001144290	0	0.180035	NA	0	NA	No	No	No	No
CG18628	NM_140144	0	5.21847	NA	0	NA	No	No	No	No
CG9990	NM_170376	0.0793853	0.973323	12.2608	3	50.0306	No	No	No	No
CG32450	NM_168953	0	0	NA	0	NA	No	No	No	No
Ugt86Dj	NM_144362	0	0	NA	0	NA	No	No	No	No
CG7025	NM_135289	0	0	NA	0	NA	No	No	No	No
RpL23A	NM_079162	1381.38	250.789	0.18155	17065	40.3732	Yes	Yes	Yes	No
Wnt2	NM_057462	0	0	NA	0	NA	No	No	No	No
Wnt6	NM_135264	0	0	NA	0	NA	No	No	No	No
Wnt5	NM_001298478	10.0289	8.33079	0.830674	71	60.3898	Yes	Yes	No	No
Wnt4	NM_057624	0	0	NA	0	NA	No	No	No	No
ldbr	NM_206300	20.5219	14.2963	0.696634	80	45.9325	Yes	Yes	No	No
CG34248	NM_001104149	0.367036	0	0	0	NA	No	No	No	No
CG43449	NM_001260110	0	0	NA	0	NA	No	No	No	No
CG43112	NM_001259333	0	0	NA	0	NA	No	No	No	No
CG43445	NM_001260245	0	0	NA	0	NA	No	No	No	No
CG43110	NM_001299603	0	0	NA	2	43.0005	No	No	No	No
CG34247	NM_001104147	0	0	NA	0	NA	No	No	No	No
CG43116	NM_001260379	0	0	NA	0	NA	No	No	No	No
CG34241	NM_001104121	0	0	NA	0	NA	No	No	No	No
CG34242	NM_001104125	22.843	25.2843	1.10687	98	51.6037	No	No	No	No
CG43115	NM_001258613	0	0	NA	0	NA	No	No	No	No
CG42249	NM_001272509	0	0	NA	0	NA	No	No	No	No
mbm	NM_134667	74.0277	62.3026	0.841612	241	84.6403	Yes	Yes	Yes	No
mbo	NM_079606	43.5458	102.69	2.35821	489	61.4895	Yes	Yes	Yes	No
Sod2	NM_001299574	251.411	674.364	2.68232	1408	56.9264	Yes	Yes	Yes	No
Sod3	NM_001316415	351.3	1713.12	4.87652	2781	58.0131	Yes	Yes	Yes	No
sog	NM_001272649	1.09369	11.1947	10.2357	20	56.4899	No	Yes	No	No
CG42792	NM_001299037	0	0	NA	0	NA	No	No	No	No
CG42790	NM_001276064	0	0	NA	0	NA	No	No	No	No
CG42797	NM_001201643	30.4698	3.97834	0.130566	208	51.4041	Yes	Yes	Yes	No
sol	NM_057390	43.6537	7.19896	0.164911	231	81.7857	Yes	Yes	Yes	No
CG42795	NM_141731	0	0	NA	0	NA	No	No	No	No
mbc	NM_001260338	13.2263	7.10814	0.537423	244	50.0887	Yes	Yes	Yes	No
CG44838	NM_001300078	37.9447	12.1629	0.320543	0	NA	Yes	Yes	No	No
Mp20	NM_057295	0.718083	20.0541	27.9273	9	42.6138	No	Yes	No	No
unc-13-4A	NM_001274575	0	0	NA	0	NA	No	No	No	No
mbt	NM_078651	59.1459	4.35896	0.0736985	638	45.3342	Yes	No	Yes	No
Pms2	NM_057675	42.9343	52.9436	1.23313	453	63.8273	Yes	Yes	Yes	No
CG44836	NM_168665	0	0	NA	0	NA	No	No	No	No
snRNP-U1-C	NM_142510	44.3944	40.1069	0.903424	529	32.7015	Yes	Yes	Yes	No
tamo	NM_166664	28.698	4.21515	0.146879	502	58.8016	Yes	No	Yes	No
CG5521	NM_001170277	14.285	3.71885	0.260332	90	73.2388	Yes	Yes	No	No
CG5522	NM_166195	33.7271	26.8721	0.796753	173	75.7838	Yes	Yes	Yes	No
CG5525	NM_135735	288.038	685.479	2.37982	1057	51.4844	Yes	Yes	Yes	No
Hand	NM_135526	0	0	NA	0	NA	No	No	No	No
Tpr2	NM_001273572	117.542	273.933	2.3305	666	61.4019	Yes	Yes	Yes	No
alphaSnap	NM_079456	75.2385	143.02	1.90089	763	53.2671	Yes	Yes	Yes	No
HisCl1	NM_169429	0	0	NA	0	NA	No	No	No	No
az2	NM_136445	23.7637	28.3802	1.19427	191	83.1192	Yes	Yes	Yes	No
Axud1	NM_001272999	27.0637	3.8395	0.141869	465	38.6979	Yes	No	Yes	No
Drip	NM_165833	1.44947	23.3365	16.1	1	13.4095	No	Yes	No	No
Grasp65	NM_140903	37.8818	137.494	3.62955	333	49.6731	Yes	Yes	Yes	No
Prx6005	NM_078739	31.4886	72.2268	2.29374	270	40.7107	Yes	Yes	Yes	No
Cpr73D	NM_001316452	0	0	NA	0	NA	No	No	No	No
CG6950	NM_169437	66.1671	65.2116	0.985559	704	68.6348	Yes	Yes	Yes	No
TwdlM	NM_143227	0	0	NA	0	NA	No	No	No	No
TwdlN	NM_170281	0	0	NA	0	NA	No	No	No	No
TwdlO	NM_143230	0	0	NA	0	NA	No	No	No	No
TwdlH	NM_143233	0	0	NA	0	NA	No	No	No	No
TwdlJ	NM_143232	0	0	NA	0	NA	No	No	No	No
TwdlK	NM_143231	0	0	NA	0	NA	No	No	No	No
TwdlD	NM_143235	0	0	NA	0	NA	No	No	No	No
TwdlE	NM_135313	0	0	NA	0	NA	No	No	No	No
TwdlF	NM_141186	0	0	NA	0	NA	No	No	No	No
TwdlG	NM_001300226	0	0	NA	0	NA	No	No	No	No
TwdlB	NM_143229	0	0	NA	0	NA	No	No	No	No
TwdlC	NM_143262	0	0	NA	0	NA	No	No	No	No
ND-42	NM_169990	147.107	316.86	2.15395	334	55.3992	Yes	Yes	Yes	No
TwdlY	NM_167540	0	0	NA	0	NA	No	No	No	No
TwdlZ	NM_167541	0	0	NA	2	26.4683	No	No	No	No
CG14153	NM_140147	0	0	NA	0	NA	No	No	No	No
TwdlV	NM_141189	0	0	NA	0	NA	No	No	No	No
TwdlW	NM_142349	0	0	NA	0	NA	No	No	No	No
TwdlP	NM_143228	0	0	NA	0	NA	No	No	No	No
TwdlQ	NM_143239	0	0	NA	0	NA	No	No	No	No
CG14154	NM_168418	0	0	NA	0	NA	No	No	No	No
ND-49	NM_001272135	83.0419	325.279	3.91704	618	42.5956	Yes	Yes	Yes	No
CG15209	NM_132426	0.230096	5.64231	24.5215	2	81.6168	No	No	No	No
CG15208	NM_001298170	0	0	NA	0	NA	No	No	No	No
up	NM_001298285	0.730458	7.29746	9.99024	7	45.6415	No	No	No	No
CG15201	NM_132463	0	0	NA	0	NA	No	No	No	No
CG15200	NM_132469	0	0	NA	0	NA	No	No	No	No
CG15203	NM_001298176	0	0	NA	0	NA	No	No	No	No
CG15202	NM_001258689	0.304221	0	0	0	NA	No	No	No	No
CG18324	NM_137091	8.0768	1.79642	0.222417	36	41.0372	No	No	No	No
CG18635	NM_137423	0	0	NA	0	NA	No	No	No	No
Gos28	NM_142482	74.7335	75.3583	1.00836	288	60.2468	Yes	Yes	Yes	No
Sid	NM_143370	0	0	NA	0	NA	No	No	No	No
AdoR	NM_143515	0	0	NA	0	NA	No	No	No	No
Sin	NM_001170015	30.713	25.9639	0.845372	184	44.2638	Yes	Yes	Yes	No
CG31908	NM_001298770	55.0854	10.5017	0.190643	596	70.3682	Yes	Yes	Yes	No
CG31909	NM_001169429	0	0	NA	0	NA	No	No	No	No
rols	NM_168487	0.128297	0.69912	5.44922	2	42.1148	No	No	No	No
CG31904	NM_164768	0	0	NA	0	NA	No	No	No	No
CG3209	NM_001299889	48.1693	100.13	2.0787	781	31.6864	Yes	Yes	Yes	No
CG31907	NM_001298776	0	0	NA	0	NA	No	No	No	No
eloF	NM_141699	0	0	NA	0	NA	No	No	No	No
Rbp1-like	NM_001201656	6.79282	7.83022	1.15272	371	57.6202	No	No	Yes	No
Acyp	NM_001298987	0	0	NA	0	NA	No	No	No	No
CG33051	NM_176344	8.35415	13.4885	1.61458	62	54.4501	No	No	No	No
CG33052	NM_176345	37.5945	48.5331	1.29096	174	63.4841	Yes	Yes	Yes	No
CG33506	NM_001014528	66.4296	37.3352	0.562028	263	55.9304	Yes	Yes	Yes	No
Als2	NM_141090	18.148	5.20783	0.286964	231	45.8924	Yes	Yes	Yes	No
CG33509	NM_001014494	0	0	NA	0	NA	No	No	No	No
Dgp-1	NM_137458	23.8671	11.3422	0.475223	198	58.5694	Yes	Yes	Yes	No
fd96Ca	NM_001300587	0	0	NA	0	NA	No	No	No	No
CG43084	NM_001259844	0	0	NA	0	NA	No	No	No	No
CG4500	NM_135852	0.0454198	0	0	0	NA	No	No	No	No
Idh	NM_168265	278.862	805.098	2.88708	2063	68.6668	Yes	Yes	Yes	No
RacGAP84C	NM_057356	0	0	NA	0	NA	No	No	No	No
Ide	NM_079458	27.6037	53.6606	1.94396	149	75.0078	Yes	Yes	Yes	No
CG3061	NM_142071	73.1746	102.242	1.39724	508	55.8998	Yes	Yes	Yes	No
CG30010	NM_001273907	15.7753	13.0577	0.82773	125	44.8333	No	No	Yes	No
CG3065	NM_138017	42.8522	7.06961	0.164976	321	57.8786	Yes	No	Yes	No
CG6984	NM_137343	32.4259	41.2699	1.27274	200	45.0821	Yes	Yes	Yes	No
Pxt	NM_142391	485.173	3743.73	7.71627	2814	97.942	Yes	Yes	Yes	No
Pxn	NM_206254	0	0.272395	NA	1	44.8162	No	No	No	No
otk2	NM_138561	6.66177	0.789162	0.118461	84	21.3536	No	No	No	No
Dsor1	NM_078543	73.6546	46.9769	0.6378	353	57.7252	Yes	Yes	Yes	No
CG43083	NM_001259843	0	0	NA	0	NA	No	No	No	No
Pxd	NM_206501	0	0.2442	NA	0	NA	No	No	No	No
CG12006	NM_139575	61.5654	12.8335	0.208454	713	45.8318	Yes	Yes	Yes	No
CG12007	NM_141255	24.3893	8.57437	0.351563	224	26.5707	Yes	Yes	Yes	No
CG12004	NM_001299970	43.2408	43.0644	0.99592	33	76.0624	Yes	Yes	No	No
RpII33	NM_058071	53.1363	79.0552	1.48778	351	60.3305	Yes	Yes	Yes	No
CG12003	NM_139368	0	0	NA	0	NA	No	No	No	No
osp	NM_001169504	15.2039	6.10748	0.401706	486	29.6138	Yes	Yes	Yes	No
CG12009	NM_139542	0	0	NA	0	NA	No	No	No	No
eIF2B-alpha	NM_143495	40.1768	48.4941	1.20702	206	50.6776	Yes	Yes	Yes	No
osk	NM_206464	213.05	120.865	0.567307	2357	51.3342	Yes	Yes	Yes	No
Nf1	NM_001276049	10.576	24.1612	2.28453	153	78.6522	Yes	Yes	Yes	No
osa	NM_079668	91.9338	51.3164	0.558189	439	58.8593	Yes	Yes	Yes	No
pes	NM_164777	73.9047	37.097	0.501957	848	60.208	Yes	Yes	Yes	No
ver	NM_140330	14.7795	12.4542	0.842663	79	42.1187	No	No	No	No
pelo	NM_057634	41.1864	6.94574	0.168641	287	54.7957	Yes	No	Yes	No
tef	NM_079042	68.1843	12.8704	0.188759	737	32.733	Yes	Yes	Yes	No
Kal1	NM_142963	0.889967	11.9624	13.4414	28	63.4122	No	Yes	No	No
CG10352	NM_001272539	0	0	NA	0	NA	No	No	No	No
CG10353	NM_167312	6.26256	1.95006	0.311384	19	62.5781	Yes	No	No	No
CG10357	NM_139564	0	0	NA	0	NA	No	No	No	No
CG6785	NM_135694	1.08833	0.296528	0.272461	7	82.8546	No	No	No	No
CG12263	NM_137488	18.0519	11.2488	0.623137	137	85.8383	Yes	Yes	Yes	No
CkIIalpha-i3	NM_001299961	17.6596	24.1686	1.36858	85	55.586	Yes	Yes	No	No
CG12264	NM_135689	59.2425	50.9142	0.85942	569	51.6215	Yes	Yes	Yes	No
CG9471	NM_141686	50.8647	96.6172	1.89949	487	66.6324	Yes	Yes	Yes	No
unc79	NM_142538	0	0	NA	0	NA	No	No	No	No
Ubc84D	NM_079536	0	0	NA	0	NA	No	No	No	No
CG12269	NM_001260259	0	0	NA	0	NA	No	No	No	No
CG6788	NM_133026	0.0882746	0	0	0	NA	No	No	No	No
CG5326	NM_142803	0.346906	0.630122	1.81641	6	76.2405	No	No	No	No
CG5321	NM_132739	0	0.414443	NA	0	NA	No	No	No	No
mahj	NM_001259522	42.9662	32.4854	0.75607	414	62.8061	Yes	Yes	Yes	No
CG8870	NM_169517	0	0.241927	NA	0	NA	No	No	No	No
CG1529	NM_134577	37.9725	7.07421	0.186298	171	43.3736	Yes	No	Yes	No
CG8878	NM_206099	55.4955	50.068	0.902199	310	60.3096	Yes	Yes	Yes	No
CG1835	NM_134560	2.65989	2.41572	0.908204	0	NA	No	No	No	No
Taz	NM_058084	34.1114	15.4522	0.452992	291	67.5847	Yes	Yes	Yes	No
CG1523	NM_143378	37.8407	24.0751	0.636222	239	65.1353	Yes	Yes	Yes	No
CG45116	NM_001300218	0	0	NA	0	NA	No	No	No	No
CG2336	NM_169148	0	0	NA	0	NA	No	No	No	No
CG7789	NM_143471	46.3178	28.6427	0.618395	201	48.1291	Yes	Yes	Yes	No
CG7786	NM_137257	0	0	NA	0	NA	No	No	No	No
Sec61gamma	NM_001298521	237.905	434.23	1.82523	1440	54.5534	Yes	Yes	Yes	No
E(spl)m7-HLH	NM_080505	0	0.483381	NA	0	NA	No	No	No	No
Tao	NM_001201743	98.3359	17.3791	0.176732	1269	42.1026	Yes	Yes	Yes	No
CG7781	NM_001298816	1.84077	3.76154	2.04346	10	54.0036	No	No	No	No
sced	NM_136375	43.3239	44.1122	1.01819	370	82.4903	Yes	Yes	Yes	No
Mat89Ba	NM_142273	29.5691	44.4782	1.50421	53	57.8832	Yes	Yes	No	No
CG6439	NM_142743	51.3416	113.396	2.20866	243	68.611	Yes	Yes	Yes	No
CG6435	NM_137321	0	0	NA	0	NA	No	No	No	No
boca	NM_165541	59.7644	72.1483	1.20721	348	46.3663	Yes	Yes	Yes	No
CG6431	NM_135598	0	0	NA	304	50.9557	No	No	Yes	No
CG14196	NM_133139	0.103432	1.97268	19.0723	4	76.1341	No	No	No	No
M6	NM_001275237	1.115	7.01063	6.28757	28	47.4067	No	No	No	No
ATPsynepsilonL	NM_001104266	0	0	NA	1	41.8112	No	No	No	No
CG14194	NM_133132	39.9001	8.17747	0.204949	312	52.0072	Yes	No	Yes	No
CG1789	NM_132276	72.226	67.7039	0.93739	267	64.078	Yes	Yes	Yes	No
CG14195	NM_001298501	0	0	NA	0	NA	No	No	No	No
CG6195	NM_142565	74.7363	88.8944	1.18944	352	56.2695	Yes	Yes	Yes	No
Six4	NM_140999	0.401497	1.09392	2.72461	4	81.8432	No	No	No	No
CG1785	NM_132274	70.7877	136.059	1.92207	272	64.8574	Yes	Yes	Yes	No
melt	NM_001274566	0.247615	1.34931	5.44922	1	45.6671	No	No	No	No
CG11007	NM_001299688	60.4781	53.8516	0.890431	636	54.8646	Yes	Yes	Yes	No
CG17378	NM_135229	0	0	NA	0	NA	No	No	No	No
CG11000	NM_001260007	0.76424	0	0	8	56.4696	No	No	No	No
Mf	NM_001300405	0.292445	1.5936	5.44922	5	61.2271	No	No	No	No
Rpt4R	NM_001300110	0	0	NA	0	NA	No	No	No	No
CG6847	NM_001298468	0.951709	9.70298	10.1953	31	69.388	No	Yes	No	No
Gr36a	NM_165205	0	0	NA	0	NA	No	No	No	No
Gr36c	NM_165207	0	0	NA	0	NA	No	No	No	No
ATPsyngamma	NM_170425	291.523	670.492	2.29996	2417	69.0357	Yes	Yes	Yes	No
CG13407	NM_142752	0	0	NA	0	NA	No	No	No	No
Grip128	NM_132802	42.0862	5.04878	0.119963	237	69.7493	Yes	Yes	Yes	No
endos	NM_001274891	277.238	729.868	2.63264	1333	86.0985	Yes	Yes	Yes	No
Mp	NM_001300031	0.996663	11.2798	11.3176	23	63.5673	No	Yes	No	No
Ms	NM_001300574	0	0	NA	0	NA	No	No	No	No
Obp83g	NM_169126	0	0	NA	0	NA	No	No	No	No
Obp83a	NM_001300260	0	0.5952	NA	0	NA	No	No	No	No
Obp83b	NM_079518	0	0	NA	0	NA	No	No	No	No
RNaseX25	NM_079242	38.3929	112.591	2.9326	570	44.9133	Yes	Yes	Yes	No
Cby	NM_142732	0	0	NA	0	NA	No	No	No	No
CG4497	NM_001201778	26.4393	27.3707	1.03523	474	37.88	Yes	Yes	Yes	No
CG4496	NM_001298779	4.76584	1.3131	0.275523	50	32.4551	No	No	No	No
CG4495	NM_001103640	38.7432	185.579	4.78998	652	37.9002	Yes	Yes	Yes	No
CG30355	NM_165617	0	0	NA	0	NA	No	No	No	No
eIF-2alpha	NM_001298400	235.841	197.91	0.839168	1067	72.1433	Yes	Yes	Yes	No
eEF1delta	NM_135517	424.873	904.439	2.12873	3349	54.3625	Yes	Yes	Yes	No
Cbp80	NM_080011	86.9207	81.5661	0.938397	616	70.9804	Yes	Yes	Yes	No
phtf	NM_136388	23.5648	11.4311	0.485094	147	63.4323	Yes	Yes	Yes	No
Myd88	NM_001273892	25.6787	39.0095	1.51914	255	52.9373	Yes	Yes	Yes	No
Or42b	NM_078900	0	0	NA	0	NA	No	No	No	No
CG17982	NM_001298078	13.3445	25.1048	1.88128	29	52.7092	Yes	Yes	No	No
Or42a	NM_078898	0	0	NA	0	NA	No	No	No	No
thetaTry	NM_078969	0	0	NA	0	NA	No	No	No	No
CG13409	NM_142747	0	0	NA	0	NA	No	No	No	No
PRL-1	NM_001273558	185.274	60.5965	0.327064	722	58.3861	Yes	Yes	Yes	No
Sfp24Bc	NM_001169391	0	0	NA	0	NA	No	No	No	No
SP2353	NM_001299545	0	0	NA	0	NA	No	No	No	No
CG16957	NM_135806	0.342752	0	0	0	NA	No	No	No	No
Syx8	NM_079389	27.379	17.5075	0.63945	141	44.4236	Yes	Yes	Yes	No
RpI12	NM_079715	55.032	65.5005	1.19023	475	37.299	Yes	Yes	Yes	No
DOR	NM_168084	8.05668	57.6499	7.15555	213	56.8103	No	Yes	Yes	No
Syx5	NM_134305	72.0443	74.2483	1.03059	475	61.7692	Yes	Yes	Yes	No
Syx6	NM_206092	51.4253	15.5385	0.302156	518	43.8047	Yes	Yes	Yes	No
Syx7	NM_168906	71.7094	116.857	1.62959	473	63.901	Yes	Yes	Yes	No
SWIP	NM_132888	7.34388	12.051	1.64096	54	36.9214	Yes	Yes	No	No
CG17186	NM_142582	35.5684	6.08505	0.17108	134	51.658	Yes	No	Yes	No
CG17187	NM_141799	24.6376	27.0256	1.09692	36	37.4225	Yes	Yes	No	No
CG17180	NM_138193	13.509	8.62658	0.638581	70	38.9366	Yes	No	No	No
CG4950	NM_001275005	0.0541242	0.147467	2.72461	0	NA	No	No	No	No
CG10822	NM_137606	0	0	NA	0	NA	No	No	No	No
La	NM_057666	193.022	131.312	0.680298	1106	52.2298	Yes	Yes	Yes	No
CG17189	NM_143277	0	0	NA	0	NA	No	No	No	No
Pop2	NM_168484	156.472	203.663	1.30159	428	54.2874	Yes	Yes	Yes	No
CG44335	NM_001300280	0	0	NA	0	NA	No	No	No	No
CanA1	NM_001260449	0.0498395	0	0	0	NA	No	No	No	No
CG34051	NM_001038827	0	0	NA	0	NA	No	No	No	No
Iris	NM_134726	0.410482	2.07704	5.05999	1	48.3771	No	No	No	No
CG6893	NM_140796	0	0	NA	0	NA	No	No	No	No
CG31759	NM_165001	13.5574	24.6257	1.81641	197	65.0674	Yes	Yes	Yes	No
CG34054	NM_001038851	0	0	NA	0	NA	No	No	No	No
CG34057	NM_001038891	0.267165	0	0	0	NA	No	No	No	No
CG34056	NM_001038890	0	0	NA	1	15.1703	No	No	No	No
CG43659	NM_001274221	0	0	NA	0	NA	No	No	No	No
CG43658	NM_001272714	18.5431	4.10336	0.221288	151	51.0559	Yes	Yes	Yes	No
CG31751	NM_165260	6.62617	9.64233	1.45519	98	45.5852	No	Yes	No	No
CG31750	NM_165208	0	0	NA	0	NA	No	No	No	No
CG31021	NM_170513	0	0	NA	0	NA	No	No	No	No
Lk	NM_080154	0	0	NA	0	NA	No	No	No	No
CG4009	NM_001275726	0.477147	7.80025	16.3477	5	42.1562	No	Yes	No	No
CG4004	NM_132596	15.8402	9.5003	0.599757	163	62.8688	Yes	No	Yes	No
CG4000	NM_142649	0	0	NA	0	NA	No	No	No	No
CG12934	NM_001299361	0	0	NA	0	NA	No	No	No	No
CG4650	NM_135878	0	0	NA	0	NA	No	No	No	No
CG42658	NM_001201753	0	0	NA	0	NA	No	No	No	No
CG42659	NM_001201906	0	0	NA	0	NA	No	No	No	No
Rim2	NM_001258911	18.1846	24.2919	1.33585	253	32.5627	Yes	Yes	Yes	No
CG17239	NM_001272991	0	0	NA	0	NA	No	No	No	No
CG10516	NM_140562	13.2422	13.8768	1.04793	104	35.4595	Yes	Yes	Yes	No
CG17237	NM_134822	0	0	NA	0	NA	No	No	No	No
CG17234	NM_164470	0	0	NA	0	NA	No	No	No	No
CG42656	NM_001202263	0	0	NA	0	NA	No	No	No	No
CG17233	NM_001259911	39.3303	6.82185	0.17345	474	22.0455	Yes	Yes	Yes	No
CG17230	NM_001300360	16.5003	10.5182	0.637456	63	83.5803	Yes	Yes	No	No
CG42655	NM_001202204	0	0	NA	0	NA	No	No	No	No
Nse4	NM_135561	47.2567	69.3303	1.4671	186	46.8143	Yes	Yes	Yes	No
Ir93a	NM_142667	0	0	NA	0	NA	No	No	No	No
Nse1	NM_001273216	46.0179	80.3338	1.74571	276	47.98	Yes	Yes	Yes	No
CG14527	NM_143388	0	0	NA	0	NA	No	No	No	No
CG14526	NM_143389	0.437117	5.83577	13.3506	14	61.6922	No	Yes	No	No
CG8765	NM_140884	27.1122	0.854698	0.0315244	209	45.9924	Yes	No	Yes	No
CG14529	NM_143384	0	0	NA	0	NA	No	No	No	No
CG14528	NM_143386	0	0	NA	0	NA	No	No	No	No
Tusp	NM_001202374	0.192027	2.96479	15.4395	10	54.5343	No	Yes	No	No
CG10631	NM_136154	14.7111	0.393603	0.0267556	175	44.1838	Yes	No	Yes	No
His1:CG33804	NM_001032115	0	0	NA	0	NA	No	No	No	No
CG10635	NM_139704	190.209	622.567	3.27307	879	37.5654	Yes	Yes	Yes	No
CG10639	NM_136079	19.5348	3.56081	0.18228	151	57.181	Yes	No	Yes	No
CG10638	NM_001300121	78.022	194.273	2.48997	254	60.2515	Yes	Yes	Yes	No
CG18764	NM_144455	10.9865	6.90785	0.628757	52	52.3447	Yes	No	No	No
CG12857	NM_137143	0.071216	0	0	1	98.7703	No	No	No	No
CG12851	NM_001299937	0.0283661	0	0	1	44.4138	No	No	No	No
CG12853	NM_144120	0	0	NA	0	NA	No	No	No	No
CG12858	NM_001259394	0.364414	4.19218	11.5039	6	50.4672	No	No	No	No
nahoda	NM_001259545	1.12088	52.9354	47.2266	48	61.838	No	Yes	No	No
Obp22a	NM_164447	0	0	NA	0	NA	No	No	No	No
skd	NM_168879	47.2625	17.8762	0.378232	284	70.0262	Yes	Yes	Yes	No
Prosalpha4T1	NM_142653	0	0	NA	0	NA	No	No	No	No
Prosalpha4T2	NM_001299915	0.639337	0.348389	0.544922	0	NA	No	No	No	No
fd64A	NM_001259680	0	0	NA	0	NA	No	No	No	No
CG15461	NM_144034	0	0	NA	0	NA	No	No	No	No
Mhc	NM_165190	0.204575	1.0719	5.23964	4	49.4147	No	No	No	No
spok	NM_001110990	0	0.153231	NA	0	NA	No	No	No	No
CG10189	NM_001273656	4.73471	3.80663	0.803984	22	56.595	No	No	No	No
CG10188	NM_165305	26.3095	11.9048	0.452489	273	55.6362	Yes	Yes	Yes	No
CG32599	NM_167398	0.100285	0.273239	2.72461	0	NA	No	No	No	No
CG10185	NM_142264	0	0	NA	0	NA	No	No	No	No
CG32225	NM_168843	0.108184	0	0	1	35.7089	No	No	No	No
CG10186	NM_001144370	0.0181898	0.0495602	2.72461	0	NA	No	No	No	No
CG32221	NM_168820	6.75035	2.37317	0.351563	129	17.6643	No	No	Yes	No
CG32590	NM_167414	26.0055	49.6968	1.91101	189	34.1942	Yes	Yes	Yes	No
CG32591	NM_001298327	0.0802994	0	0	0	NA	No	No	No	No
dyl	NM_168078	0	0	NA	1	41.4969	No	No	No	No
CG7208	NM_142426	136.37	44.5486	0.326675	988	32.0173	Yes	Yes	Yes	No
ss	NM_057400	0	0	NA	0	NA	No	No	No	No
sr	NM_001300455	0	0.0924777	NA	0	NA	No	No	No	No
CG7201	NM_001274645	0	0	NA	0	NA	No	No	No	No
CG7200	NM_001299102	24.8793	23.333	0.937849	196	35.3905	Yes	Yes	Yes	No
wun2	NM_001299319	79.2437	2.85971	0.0360876	383	47.6154	Yes	No	Yes	No
CG7206	NM_001258799	17.5329	25.6329	1.46199	275	64.7087	No	Yes	Yes	No
NijC	NM_001104291	2.00904	2.0527	1.02173	9	106.331	No	No	No	No
st	NM_079384	0.0464674	0	0	0	NA	No	No	No	No
Gpo-1	NM_001103862	2.68774	14.5299	5.40598	32	75.109	No	Yes	No	No
so	NM_057385	0.301942	0	0	0	NA	No	No	No	No
sn	NM_167143	76.8979	81.4512	1.05921	540	57.0327	Yes	Yes	Yes	No
sm	NM_001259500	1.39195	32.3188	23.2184	29	54.3349	No	Yes	No	No
sl	NM_057378	16.2199	2.0241	0.124791	255	68.2509	Yes	No	Yes	No
sc	NM_057455	0	0	NA	0	NA	No	No	No	No
sa	NM_141054	0	0	NA	0	NA	No	No	No	No
E(spl)m3-HLH	NM_079785	0.145053	0.790425	5.44922	0	NA	No	No	No	No
[truncated: 11,457 more rows]

## Sheet: Activated eggs wt
Supplementary File 2E. Processed RNA-seq, ribosome profiling, and PAL-seq data for wild-type activated eggs.
[truncated: 12,404 more rows]

[truncated: 11 more sheets: 0-1 h embryos wt, 2-3 h embryos wt, 3-4 h embryos wt, 5-6 h embryos wt, Stage 13 oocytes wispy mutant, Laid eggs wispy mutant, St. 13 oocytes wispy mut wt RNA, Laid eggs wispy mutant wt RNA, Stage 14 oocytes png mutant, Activated eggs png mutant, 0-1 h embryos smg]
