# Supplementary material for: mRNA poly(A)-tail changes specified by deadenylation broadly reshape translation in Drosophila oocytes and early embryos
Source: eLife journal article supplement (doi:10.7554/elife.16955), 2016-07-30
Supplement: supp [file elife-16955-supp-v1.zip › elife_poa_e16955_Supplementary_File_3.xlsx]

## Sheet: Sheet1
Supplementary File 3. Lists of mRNAs highlighted in figures.
This file lists mRNAs that are highlighted in Figures 6 and 7, and Figure 2−figure supplement 1C, Figure 2−figure supplement 2, Figure 5−figure supplement 1, and Figure 7−figure supplement 1.
Figure 6B and D, png-dependent downregulated mRNAs	Figure 6C and D, png-dependent upregulated mRNAs	Figure 7A and C, png-dependent downregulated mRNAs	Figure 7B, png-dependent upregulated mRNAs	Figure 2−figure supplement 1C, mRNAs with TE ≤0.1 in stage 11 oocytes	Figure 2−figure supplement 2A and B, reduced tail-length mRNAs	Figure 2−figure supplement 2A and B, proteasome subunit mRNAs	Figure 5−figure supplement 1A, stage 13 oocytes ribosomal protein mRNAs	Figure 5−figure supplement 1A, laid egg or 0−1 h embryo ribosomal protein mRNAs	Figure 5−figure supplement 1D, stage 13 oocytes RPF pseudocounted in wild-type sample	Figure 5−figure supplement 1D, stage 13 oocytes RPF pseudocounted in wispy-mutant sample	Figure 5−figure supplement 1D, laid egg or 0−1 h embryos RPF pseudocounted in wild-type sample	Figure 5−figure supplement 1D, laid egg or 0−1 h embryos RPF pseudocounted in wispy-mutant sample	Figure 7−figure supplement 1, SMG-bound mRNAs
Der-1	lok	Der-1	lok	dnc	Caf1-55	Rpn1	RpL10	RpL10	Ocho	PIG-V	Cp16	Syt1	Jheh2
Cyp6a19	neur	Cyp6a19	neur	Brca2	CG2051	Rpn10	RpL10Ab	RpL10Ab	Dhc36C	CG18428	CG13084	Cdep	LSm7
Amph	CG4049	Amph	CG4049	Nopp140	CG10527	Rpn11	RpL11	RpL11	CG12493	dock	Vm26Ab	ac	Hex-A
Akt1	Vps11	Akt1	Vps11	Myc	CG4476	Rpn12	RpL12	RpL12	Mer	eIF2B-gamma	Vm26Aa	Lip4	CG5194
CG5885	Rtf1	CG5885	Galphao	Hsl	CG15047	Rpn13	RpL13	RpL13	Hsp67Ba	CG11103	Yp2	Jon99Fii	rap
dre4	CG11811	dre4	Rtf1	hang	Hsp26	Rpn2	RpL14	RpL14	CG14721	SelG	Yp1	CG14419	krimp
Rpn3	kuk	Rpn3	CG5746	smg	CG7601	Rpn3	RpL15	RpL15	CG32436	Trs33	Vm34Ca	Rfx	Msh6
vig2	Gprk2	vig2	kuz	stg	Gapdh2	Rpn5	RpL17	RpL17	CG9360	Snm1	Vml	Prat2	CG11208
Fim	CG11417	CG12811	CG11811	nonA-l	GstD3	Rpn6	RpL18	RpL18	CG14440	l(3)87Df	Cp18	Jon25Bii	CG5021
CG33156	Cpr	Fim	kuk	CG18769	Nnf1b	Rpn7	RpL18A	RpL18A	Nep4	Taf8	Cp19	phyl	CG3792
Ufd1-like	Su(var)3-7	CG33156	Gprk2	dmt	Rpn12	Rpn8	RpL19	RpL19	retn	CG14130		Cpr67Fa2	CG8258
path	Cp190	Ufd1-like	CG11417	CG4622	epsilonCOP	Rpn9	RpL21	RpL21	tsh	Dbp21E2		Xrp1	Nup43
cindr	Fkbp14	path	Cpr	CG13344	Tsp74F	Rpt2	RpL22	RpL22	CG8485	CG6984		CG31249	l(3)02640
CG3902	hop	cindr	Su(var)3-7	ppan	Rpn7	Rpt3	RpL23	RpL23	haf	CG8441		CG3814	Ssb-c31a
CG10254	CG31523	CG3902	Cp190	sti	ND-49	Rpt4	RpL23A	RpL23A	uif	CG12106		tin	Hr39
CG11309	CG7806	CG10254	Als2	asp	Cks30A	Rpt5	RpL24	RpL24	a6	Pex16		CG14427	rictor
Spindly	Dref	CG11309	unc-119	CG14814	dUTPase	Rpt6	RpL24-like	RpL24-like	P5cr-2	CG30109		CG12607	Fim
Nak	CG4747	Spindly	hop	CG9926	CG31548	Prosalpha2	RpL26	RpL26	CG42450	U4-U6-60K		CG5804	Gs1l
CG6758	MRP	Nak	CG31523	CG1603	sds22	Prosalpha3	RpL27	RpL27	Pu	Cyp6a14		edl	Nacalpha
dmpd	CG10417	l(2)k14710	Dref	lok	Ctf4	Prosalpha4	RpL27A	RpL27A	CG11723	CG10214		CG13321	CG3902
CG8331	DCP2	Orc2	CG4747	Jarid2	yip2	Prosalpha5	RpL28	RpL28	Hsl	Taf11		CG12814	Inos
CG30389	ihog	CG6758	MRP	CG4880	Rpn1	Prosalpha6	RpL29	RpL29	stv	Vav		CG42676	CG33129
CG4449	smg	dmpd	CG10417	CG7372	Cp16	Prosalpha7	RpL30	RpL30	CG12877	alpha-Est3		CG10657	eIF-2alpha
Rca1	hang	CG8331	rt	CG9776	Pp2A-29B	Prosbeta1	RpL31	RpL31	CG32817	CG6073		CG16791	mask
Ack-like	Pdk	CG30389	ihog	CG32767	wus	Prosbeta2	RpL32	RpL32	CG18643	CG32069		CG9416	CG6927
Tpi	tor	CG4449	smg	CG8414	CG8111	Prosbeta3	RpL34a	RpL34a	CG14322	HPS1		l(2)k14710	beta4GalT7
RhoGAP68F	CG3918	Rca1	hang	stwl	CG31075	Prosbeta4	RpL34b	RpL34b	Tina-1	snRNP-U1-70K		LManI	CG3652
Bzd	Bap170	Ack-like	Pdk	pbl	CG5590	Prosbeta5	RpL35	RpL35	Cyp317a1	CG2371		CG5853	CG7777
CG4593	Ire1	Tpi	Gk	mld	Pglym78	Prosbeta6	RpL35A	RpL35A	CG4914	beta3GalTII		nemy	hd
CG4594	Jupiter	Bzd	tor	Ire1	poly	Prosbeta7	RpL36	RpL36	PGRP-LA	Ccm3		PhKgamma	Cyp6a19
Nup43	brat	CG4593	CG3918	CG4281	CG3831		RpL36A	RpL36A	CG13698	Invadolysin		Esyt2	Hsp83
kat80	Cdk4	CG4594	Bap170	slam	Mcm3		RpL37A	RpL37a	nrv3	Ipod		Snx16	morgue
Mis12	CenB1A	Nup43	Fadd	HP1b	RPA2		RpL37a	RpL37A	Hsp68	Bet1		bru-3	Moe
pgc	CG6966	kat80	CG2310	RhoGAP19D	ScpX		RpL38	RpL38	CG9498	CG3008		Orct	CG6422
fs(1)Ya	CG6962	Mis12	CG5199	elg1	CG6084		RpL39	RpL39		CG5969		Npc2b	CG15771
RecQ4	Sdc	pgc	Ire1	CycB3	CG18190		RpL4	RpL4		CG7550		hh	CG12264
RecQ5	CG12877	fs(1)Ya	nAChRalpha4	CG10492	sta		RpL40	RpL40		tej		CG6967	CG7556
CG31717	sax	RecQ4	Jupiter	AGO3	EndoGI		RpL41	RpL41		pr		CG14937	26-29-p
GAA1	Tsp96F	RecQ5	CG3838	CG9246	trsn		RpL5	RpL5		CG6454		Lcp65Ag3	da
CG3773	HP5	CG31717	CG4022	Elba2	SdhD		RpL6	RpL6		CG15011		CG8298	CG31548
CG17209	CG9795	GAA1	brat	osk	CG13083		RpL7	RpL7		CG3165		CG31343	Cyp1
gammaCOP	Dl	CG3773	unk	HP5	RPA3		RpL7A	RpL7A		CG14903		CG15765	MED19
Pi3K21B	CG6179	CG17209	CenB1A	tos	Nup75		RpL8	RpL8		Smu1		Pex11	Lk6
hd	CG5199	gammaCOP	CG6966	CG5808	Tpi		RpL9	RpL9		t		CG12818	CG17776
mus101	Trn	Pi3K21B	CG6962	krimp	Zip88E		RpLP0	RpLP0		Cg25C		MP1	Hsp60
alpha-PheRS	nudE	hd	Sdc	SAK	CG4406		RpLP1	RpLP1		CG12267		sei	DppIII
gammaSnap1	Rcc1	mus101	CG12877	fzy	UGP		RpLP2	RpLP2		CG1738		CG11069	nos
Jafrac1	bora	wash	loco	IKKbeta	yl		RpS10b	RpS10b		CG11986		CG17294	Snx16
CG4901	CG17514	gammaSnap1	tank	CG11180	Rpt6		RpS12	RpS12		l(2)37Cg		CG1441	CG11076
CG1316	ade5	CG4901	Tsp96F	wdn	Mtpalpha		RpS13	RpS13		bchs		tld	shu
Npl4	cno	CG7685	CG15435	l(1)1Bi	CG2118		RpS14a	RpS14a		CG18731		Muc18B	lost
Mcm3	pll	Npl4	mys	Socs16D	capt		RpS14b	RpS14b		CG32137		Osi9	wash
Ork1	AGO3	Mcm3	HP5	CG8545	Rpt4		RpS15	RpS15		Trs23		Mkp3	tral
cort	mbt	CG12384	CG9795	CG8108	CG8778		RpS15Aa	RpS15Aa		CG33052		egr	trc
CG11208	wap	CG11208	Dl	CTCF	Vha68-2		RpS16	RpS15Ab		Mon1		IM33	cid
CG6180	Axud1	CG6180	CG6179	del	Arc42		RpS17	RpS16		Mmp1		CG12155	Sxl
CG8321	Top1	CG8321	Daxx	Dok	Ssb-c31a		RpS18	RpS17		Ent2		Neu2	hoip
CkIIbeta	CdsA	CkIIbeta	CDK2AP1	BCL7-like	QC		RpS19a	RpS18		Fancl		calypso	Dhfr
tyf	Als2	tyf	CG7772	mxc	BigH1		RpS2	RpS19a		Pgant35A		Slc45-1	CG5721
CG6567	sqd	CG6567	uex	tub	CG11208		RpS20	RpS2		CG4806		scrt	FeCH
Ice1	CG2247	Ice1	Trn	tef	His3.3A		RpS21	RpS20		CG3448		CG7724	dpa
SH3PX1	IntS3	CG12241	nudE	CG8726	c12.1		RpS23	RpS21		CG14441		CG10338	Evi5
Ctr1A	gus	SH3PX1	Rcc1	CycB	EMC8-9		RpS24	RpS23		CG5002		CG15480	pbl
Letm1	CG8273	Ctr1A	bora	CG12054	CG5104		RpS25	RpS24		CG6621		Blimp-1	CG6638
CG8258	mi	Letm1	CG17514	insv	RfC3		RpS26	RpS25		rap		Pex10	RpL7A
Chmp1	CG5033	CG8258	ade5	CG10543	CG3011		RpS27	RpS26		Spn28Dc		CG8547	Pcl
dl	Psn	CG5196	CG30344	CG9925	Prosbeta1		RpS28b	RpS27		CG18659		Hr39	alphaTub67C
Nop17l	Rm62	Chmp1	pll	CG10959	alphaTub84D		RpS29	RpS28b		CG9413		CG2150	CG8993
Klp68D	Syx6	dl	AGO3	CG10866	Etf-QO		RpS3	RpS29		Prat		CG7173	Ufd1-like
Sec6	fbl	Nop17l	Sema-1b	grp	Spase22-23		RpS30	RpS3		CG43103		fj	dre4
Hira	msn	Klp68D	mbt	CG14438	CG7433		RpS4	RpS30		CG7115		CG42394	CG4612
CG42271	Abl	Sec6	slim	Scm	Irp-1B		RpS5a	RpS4		CG8478		Ugt36Bc	CG2918
Tomosyn	caz	Hira	tamo	Dl	Cas		RpS5b	RpS5a		CG31109		l(1)G0136	Tapdelta
CG14545	ena	CG42271	CG5854	E(var)3-9	DCTN2-p50		RpS6	RpS5b		CG7408		CG4957	Trxr-1
CG6967	Rad23	Tomosyn	wap	CG12942	Acph-1		RpS7	RpS6		CG34008		sda	Dip-B
frj	CG3655	CG14545	Axud1	CG11417	Sod2		RpS8	RpS7		Br140		wdp	CG10077
DNApol-alpha73	nonA-l	CG6967	Top1	Mes2	RfC4		RpS9	RpS8		CG7358		Meics	Pex11
dhd	Glycogenin	frj	CdsA	CG6712	CG9272			RpS9		CG12253		Atg12	ade5
CG5262	CG9005	DNApol-alpha73	CG6171	HipHop	CG2091					CG10075		Wnt4	lola
CG6084	Tis11	dhd	sqd	nej	GstD1					CG10336		Mf	CG2034
CG7685	Tlk	Got2	CG2247	dnk	CG10688					CG17124		RpI12	vig2
CG6770	flfl	CG5262	CG12006	Cp190	mms4					Lsm10		CG17186	Nap1
CG6178	CG5027	CG6084	IntS3	CG8173	CG11309					CG5626		CG5346	eIF2B-delta
CG10344	Sam-S	CG6770	gus	Gprk2	CG4495					ZnT86D		eve	CG10166
CG5196	CG10984	CG6178	CG8273	Set2	Got2					CG15514		tok	blw
CG7777	Sucb	CG10344	mi	CG6650	RnrL					Art8		Osi19	Rpn7
vih	CG9915	CG7777	CG5033	psq	Tango9					Cog3		wntD	Arc42
CG17776	Crtc	CG17776	Psn	mol	Prosbeta5					CG5919		Lsm11	Capr
Sxl	EcR	Sxl	Rad23	MED26	Mdh1					CG5131		Cpr65Av	CG16817
GstD3	CG10565	GstD3	CG45049	CG7744	CG9135					nero		CG13671	CG12811
GstD1	Dmtn	GstD1	Rm62	CG8273	Aos1					CG5872		CG9757	CG1239
Dip-B	Drep1	Dip-B	Syx6	Apc2	CG7054					CG6674		CG11200	SdhA
CG30185	Strip	CG30185	fbl	RhoGAP54D	CG5009					Mst85C		CG12769	CG13917
CG30183	D1	CG30183	CG17359	Hsf	Calx					CG14881		CG8596	Rala
Zn72D	tkv	Zn72D	Abl	spir	CG10932					Madm		CG18269	Sec61beta
fok	CG14621	fok	caz	Nipped-B	tsr					brn		CG3857	smg
SRPK	Ocrl	CG3548	CG12179	Cen	zetaCOP					CG5846		CG3097	UGP
CG3548	Bub1	MCPH1	mav	neur	asf1					Prp38		CG5118	Nat1
MCPH1	ssx	Sod3	CG5830	Gbs-70E	Gapdh1					CG30440		hkb	gammaTub37C
Sod3	jigr1	mbc	MYPT-75D	CG10395	Orc4					RpS14a		su(r)	fok
mbc	Tm1	l(2)gd1	wun2	CG13001	Irbp					CG16890		emp	Rpn1
l(2)gd1	CG7945	DNApol-epsilon255	CG3655	SRm160	VhaM8.9					CG34293		CG13506	Rpn2
Prat	CG17528	CG3689	nonA-l	Lk6	CBP					dob		Dr	wts
DNApol-epsilon255	CG30020	crol	Glycogenin	Tis11	ubl					Ext2		CG13712	CG8206
CG3689	pav	CG14516	CG7806	l(1)G0020	LSm1					CG5274		Cpr31A	GstD1
Rbpn-5	Miro	CG14882	CG9005	Rnp4F	Rat1					CG9391		CG12883	Rab7
CG14516	ck	CG4925	CG9004	CG31342	Tsp39D					CG10353		CG9630	Rab6
CG14882	Rox8	CG33506	NAA20	CG6013	GCS2beta					Usp15-31		zormin	Rpn9
Pxt	grp	Pxt	Tlk	hyd	Cp19					CG1896		esg	CG9344
CG4813	Start1	CG4813	Fkbp14	dah	Nup107					CG3262		CG32485	Su(z)12
CG2246	Su(dx)	Aats-ala-m	flfl	5PtaseI	Aldh					c12.2		CG4306	pAbp
CG6091	mod	CG6091	CG5027	CG1663	CG11103					CG5877		CG3631	Pdp
rod	polybromo	rod	CG7979	l(2)dtl	Ostgamma					Su(z)12		MFS12	CG3939
CG6094	CG4996	CG6094	Sam-S	CG8485	Thiolase					CAH2		sob	CG9609
IntS1	eIF4AIII	IntS1	CG10984	Usp15-31	clos					psd		CG8134	Rbp2
CG16908	lolal	CG16908	stg	CG30020	Cp18					CG8121		Alp1	ttm50
Dhfr	sra	GckIII	CG8516	Set8	CG32642					fand		CG13068	CG2182
GckIII	CG3744	CG11178	Kap-alpha1	east	CG8142					CG31751		CG14565	endos
CG11178	wdn	CG8270	Sucb	mi	PyK					HSPC300		CG12964	Nurf-38
CG8270	CG11141	mh	CG9915	CG8060	CG8223					CG14572		ttm50	E(bx)
mh	CG12547	PCB	Crtc	Tao	FKBP59					IntS4		Ero1L	SA
PCB	CG17829	CG7987	EcR	Mtor	Rpn6					noc		CG9297	CG5028
CG7987	Src64B	ken	Naa60	Src64B	CG5010					Lkb1		CG43386	Etl1
ken	Wee1	CG7966	Dd	NC2alpha	GstE6					CG18343		Tmhs	Caf1-180
CG7966	CG7369	Ime4	CG10565	PDZ-GEF	Gdh					Ns1		Pxn	Pi3K21B
Ime4	CG1667	WRNexo	Dmtn	Topors	Npc2a					CG7912		Slimp	Trx-2
WRNexo	Atg1	msi	Drep1	CG8833	CG8397					spn-A		Bet1	porin
msi	Brf	Oga	Strip	CG11920	cm					CG31053		CG14147	Srp68
Oga	lace	CG8892	D1	Sos	Cct5					eIF2D		Muc91C	CG1812
CG8235	nst	CG8235	tkv	CG12081	CG8728					Aats-leu		CG42492	Mnt
beta-PheRS	GC1	beta-PheRS	CG3797	CG7139	PCNA					CG11674		tsg	Bet1
Spc105R	alpha-Man-IIa	Spc105R	CG14194	Mitf	RpLP0					nopo		CG17323	Cpsf73
Rim2	CG31650	Rim2	CG14621	RhoBTB	Mcm2					Sgf29		CG6758	Rca1
mbf1	CG4364	TBCD	Ocrl	CG3764	spn-A					CG9791		Ccp84Ad	Gnf1
CG32138	nito	CG32138	Bub1	Crag	CG10470					Mat1		byn	CBP
PyK	Patr-1	PyK	ssx	not	Sod					sip2		CG1764	Tcp-1zeta
Pgd	MTA1-like	Vps2	CG18769	PRAS40	RpL10Ab					Sec71		TwdlG	mod(r)
Pgk	Sema-1b	CG31249	CG3860	Cap-G	CG14434					CG14100		CG5326	CG12883
Pgi	CG1677	Pgd	jigr1	srl	Catsup					GIIIspla2		kni	vib
CG11377	Bsg25D	Pgk	CG12288	ash1	alphaCOP					Nxt1		Ttc19	AnxB9
RfC4	Hrd3	Pgi	Tm1	RhoGAP93B	CAH2					Rpb12		CG17124	CG4789
CG3652	corto	CG11377	tub	CG7504	Trxr-1					sofe		Osi18	Rpt5
CG2982	CG7185	Pka-R2	CG7945	metl	CG4598					Cpr50Cb		mus308	Rpt3
nod	CG7504	RfC4	fs(1)K10	Su(var)3-7	Rpn2					sip3		lin-28	CG15916
AP-2mu	CG6051	CG3652	HP1b	CG9005	Psf2					ZnT35C		CG13033	CG9547
CG10166	Bsg	CG2982	dlg1	CHIP	alien					CG40228		Kaz-m1	Ipk2
CG6153	Dok	nod	RtGEF	CG8180	CG12171					Atg12		slbo	Mob4
CG8993	Non2	AP-2mu	CG30020	CG8677	CG30051					omd		CG18507	Top3beta
Mob2	Osbp	CG10166	pav	Daxx	Vha36-1					Ada2b		wbl	CG11699
CG12107	CG10702	CG6153	Miro	rno	ND-42					MCPH1		kraken	Caf1-105
iPLA2-VIA	Tao	CG8993	Rox8	CG17360	CG5525					CG5789		Obp83g	CG8331
FeCH	lute	Mob2	grp	CG9986	CG11876					CG11885		CG13082	mRpL38
Cpsf73	Liprin-beta	iPLA2-VIA	ck	CG10979	CG9485					Su(var)3-3		CG10472	CG14411
CG32856	Apc2	FeCH	Start1	CG1234	CG12375					Art3		CG13465	CycE
CG15916	CG14814	Cpsf73	CG9346	CG30440	Prosbeta6					Ercc1		CG10512	CG14543
CG5846	Spt6	CG15916	Su(dx)	glec	Sec10					mfas		CG7272	CG2852
CG9376	cact	RhoGAP68F	mod	CG4049	EMC1					CG32095		nub	CG14545
Jabba	CG1910	Apc	polybromo	cal1	Rpn3					CG9775		CG13545	Prat
png	cdm	CG1316	CG4996	wge	CG1598					Cbp20		cbt	CG10254
CG9917	CG5037	CG9376	FLASH	RhoGAPp190	msd1					e(y)1		CG3961	Hmt4-20
Cul3	ATP7	Jabba	eIF4AIII	CG8319	Nup44A					CG1513		CG17712	SH3PX1
Phm	BicD	png	lolal	CHES-1-like	Prosalpha7					CG1575		CG34404	mRpL22
Rpn11	stg	CG9917	Mer	CG32176	Klc					CG2931		pnr	CG5525
CG6937	CG8177	Cul3	sra	alpha-Man-IIb	CG10237					CG30349		sba	FucT6
CG3267	sigmar	Phm	CG3744	CG2116	dmGlut					mus201		Jon65Aiv	aret
Xpac	CG34133	Rpn11	CG8520	CG7029	CG6543					Opa1		CG13000	CG9065
CG32676	CG43427	CG6937	wdn	CG6321	VhaSFD					Sec3		CG11279	P32
CG7091	CG1737	CG3267	CG11141	pho	Nedd8					Mad1		MFS3	spas
Cyp1	Pngl	Xpac	scra	crol	CG8331					MAN1		Cda4	CG3226
Pka-R2	Pp1alpha-96A	CG32676	CG12547	CG32365	GstS1					CG11377		CG7763	jub
CG10289	woc	CG7091	CG17829	D19A	Ho					w		btd	Mlf
CG33172	N	Cyp1	Wee1	Rrp6	Prosalpha6					CG7730		CG13784	CG17202
eIF-4E	Hip14	CG10289	Rrp6	CG2694	Glo1							Sas-6	Atx2
Ssadh	Rat1	Rbpn-5	CG7369	CG17361	Uch							CG7294	CG12321
CG11396	Ubi-p5E	CG33172	Osbp	CG7839	Ipod							CG9568	asf1
CG5010	gfzf	eIF-4E	CG1667	MESR4	Ent1							CG7017	mRpS2
CG2918	CG12084	CG9674	CG17528	CG7686	CG11679							CG6885	Grip84
P32	CG12081	Ssadh	Atg1	fs(1)h	CG14966							CG15023	CG3566
CG8858	CG8944	CG11396	Brf	CG7337	Fdh							Mef2	CG2046
mRpL43	Nopp140	CG5010	lace	RnrS	CG1371							qless	CG8507
mRpL46	bif	CG2918	Fic	Pex23	CG16892							bwa	png
PIG-C	Nipped-B	P32	GC1	alpha-Man-IIa	CG5846							mthl5	CG15047
CG4476	koko	CG8858	CG5815	dco	RhoGAP68F							GstT4	CG9149
Rpt5	Eph	mRpL43	alpha-Man-IIa	CG6701	Rpt2							corn	Sas-4
PNUTS	CycA	mRpL46	CG31650	CG10555	Tsp42Ef							CG3246	bel
CG13907	CycB	CG4476	CG4364	CG1815	GAA1							CG13067	gnu
RpA-70	Tango10	Rpt5	nito	Asap	RagA-B							cv-2	Mes2
nesd	fax	PNUTS	CTCF	DIP2	CG6927							CG13044	CG7033
CG11802	Ptp69D	mxt	Patr-1	CG12301	Prosalpha3							PPO2	Gapdh2
CG17259	sdk	CG13907	nmo	mud	CG17259							CG9119	mbf1
CG8728	Tl	RpA-70	MTA1-like	l(2)34Fd	CG7091							CG9449	Gapdh1
CG6928	Ptpmeg	nesd	CG1677	CG8878	plu							Ubx	CG3760
CG11710	wech	CG11802	EMC3	brat	VhaPPA1-1							sc	CG8180
Mlh1	CG4880	CG17259	Hrd3	CG14712	fal							zen	cpa
Ltn1	Hmr	CG8728	corto	jing	Men							CG4573	Got2
CG18190	gb	CG6928	ear	CG8155	CG31950							CG8147	eIF-2beta
AOX3	RhoBTB	CG11710	CG7185	Bsg25D	CG8209							CG34166	Hsc70Cb
Papss	uex	Mlh1	CHES-1-like	qkr54B	GstE12							Antp	CG11138
Snx16	d4	Ltn1	CG7504	CDC45L	iPLA2-VIA							CG5707	CG8134
CG33506	CG8370	CG18190	CG6051	CG31365	CG31229							CG12934	mRpS25
Men	CG32732	AOX3	Bsg	Cdc6	CG9953							oc	CG17896
Srp72	Dcp-1	Papss	Dok	dikar	Aats-ala							ImpL2	Ef1alpha48D
alphaTub67C	cta	Snx16	RluA-2	CG1667	APC7							pxb	La
CG15011	apt	Men	Doa	cdm	Mis12							CG10516	CG6770
Trx-2	CG1275	Srp72	numb	mei-P26	l(2)35Be							Nmnat	Uba1
CG7627	JIL-1	alphaTub67C	Non2	orb	CG14931							tll	CG11876
garz	qkr58E-2	CG15011	CG10702	CG10777	CG14715							CG10068	CG8892
MetRS	exd	Trx-2	lute	CG9636	Pgi							CG3106	CG8235
Arc42	TM9SF3	CG7627	Liprin-beta	bru	yin							Gat	CG9426
CG9065	Pmm45A	garz	Apc2	gus	Tspo							CG9547	rin
pes	Trf4-2	MetRS	sti	sced	or							ASPP	cbs
mRpS2	CG5439	Arc42	CG14814	CG31457	Arp1							mRpL37	Hph
Gapdh2	csul	CG9065	Spt6	CG5800	Psc							CG13051	Mcm3
Gapdh1	BTBD9	pes	RAF2	XRCC1	Vha100-1							mas	ras
CG16935	alpha-Man-Ia	mRpS2	Tao	myo	CG9921							Tsp	Hop
CG10960	Rab35	Gapdh2	cact	ATP7	Rpt3							CG3634	Aldh
CG1665	CG8173	Gapdh1	CG1622	CG7878	CG4586							Oatp58Dc	Pgk
CG1663	bys	CG16935	CG1910	CG7457	CG1161							Jon25Bi	128up
CG10527	l(3)psg2	CG10960	Bsg25D	E(Pc)	dgt6							CG1273	CG18815
Aats-asp	dah	CG1665	cdm	mute	LSm7							fne	CG10638
Aats-asn	NTPase	CG1663	CG5037	Dlip2	CG5339							Zasp52	Imp
Cks30A	Ptpmeg2	Aats-asp	ATP7	rasp	26-29-p							CG2698	sav
IscU	jing	Aats-asn	CG32112	tay	Pen							RyR	CG10960
CG3408	UbcE2H	casp	CG10795	CG5004	Nup43							nullo	Claspin
fu12	g	Atg6	BicD	Rat1	Rpt5							abd-A	SCAR
AdSL	fs(1)h	CG2246	Elba2	polybromo	Rpn9							ftz	pav
RagC-D	insv	Fancl	CG8173	ear	CG7407							CG8773	CanA-14F
Capr	CG7872	CG3408	CG8177	d4	Phm							Sema-2b	CG11779
slmb	Ras64B	fu12	sigmar	conu	CG6180							aos	CG4603
mRpL47	POLDIP2	AdSL	oxt	sigmar	Prosbeta2							CG30089	l(1)G0156
casp	Pax	CG12883	CG34133	CG17698	Pgm							Sugb	CG1749
vib	CG5746	RagC-D	CG2100	CG14322	CG8036							CG10778	fs(1)Ya
mtSSB	Saf-B	Capr	CG43427	CG32452	Prosalpha5							CG15731	RpS3
twf	Daxx	slmb	CG1737	CG7326	CG34261							geko	SppL
SMC1	CG32767	mRpL47	Pngl	CG9915	fs(1)N							Mpp6	Rpn13
SMC5	CdGAPr	gammaTub37C	Hsl	l(2)35Df	Prp31							CG6933	Rpn10
CG2118	CG7139	SRPK	Pp1alpha-96A	tth	CG9911							Cyp6d5	Rpn11
CG9125	Lon	ScpX	woc	CG7200	COQ7							mirr	CG1663
RIOK2	CG9992	vib	Tsr1	PI4KIIIalpha	dpa							CG43725	CG1598
ZnT35C	BEAF-32	mtSSB	CG6805	CG3021	CSN1b							if	CG6404
SA	RhoGAP54D	twf	N	N	CG4267							Ccp84Ac	CG5010
CG9547	CG17002	SMC1	CG32638	e(r)	p115							gsb	TER94
CG8230	pzg	SMC5	Mtl	CG8435	CG8460							NetA	CG12159
CG8892	Dyrk3	CG2118	Hip14	Cwc25	AP-1sigma							htl	Aats-asp
CG2974	CalpB	CG9125	Rat1	pzg	CG1665							CG11911	CG1354
stas	CG11652	RIOK2	CG5276	CG7357	CG11164							CG10904	Nmt
CG8142	fws	ZnT35C	Papst2	mmy	Nurf-38							CG32266	CG6084
Mulk	Afti	SA	Ubi-p5E	trem	Cp15							CG10621	CG17712
pcs	chico	CG9547	DCP2	aret	Xpc							Papss	Fen1
AP-2alpha	kdn	CG8230	vret	CG6422	APC10							Lrt	RpA-70
wash	dco	Aldh	CG12713	CG15435	ATPsyngamma							Cpr62Bc	CG9588
CG5776	Rab8	CG2974	l(3)73Ah	CG11873	Ndc1							olf413	Pp2B-14D
mib1	CG14971	stas	gfzf	CG11982	aurA							Shroom	Sar1
CG6903	mthl1	CG8142	CG6650	CG7728	CycH							E(spl)mgamma-HLH	APC7
hoip	CG4281	AP-2alpha	l(1)1Bi	Atg1	Idh							Ac78C	CG31249
asp	ed	Mulk	CG12084	BtbVII	CG7970							CG6409	U2A
Aats-glupro	yrt	pcs	CG12081	Trf4-2	CG13887							CG8668	CG7441
Rbcn-3A	smid	alpha-PheRS	CG8944	CG1636	CG7840							GATAe	Pgd
Synj	hb	CG5776	Nopp140	Tsc1	cwo							CG32982	Txl
Desat1	pic	mib1	bif	lola	awd							CG13063	CG9926
CG15387	myo	CG6903	Kdm4A	Galphao	CSN5							CG13047	schlank
CG31689	Ref1	hoip	Nipped-B	Meics	ALiX							CG17734	CG4593
Mvl	pod1	asp	Mgat1	pita	Edem2							Cdc7	CG6937
toc		cort	koko	CG12288	baf							CG9286	CG10576
REPTOR		Aats-glupro	Eph	CG5098	CG8399							CG43163	Pgi
CG9609		Rbcn-3A	CycA	mus81	CG3618							mey	CG9330
crol		Synj	CycB	Usp12-46	mRpL46							miple1	CG9135
CG3760		Sirt6	Tango10	Mekk1	CG12404							Cht7	exu
CG3764		Desat1	fax	pad	CG32441							Ssk	WRNexo
MBD-R2		CG15387	TM9SF3	dsd	arr							l(2)34Fc	Gdi
Trxr-1		CG31689	Ptp69D	CG15439	Ran							kon	CDC45L
CG7609		IscU	sdk	Pep	sun							CG10721	CG2246
CG12384		Mvl	msn	CG10321	CG6293							drm	Adam
Lint-1		toc	CG2767	CG8326	CG1129							CG33978
LSm7		REPTOR	Tl	CG3995	CG12264							mid
LSm1		CG9609	CG11523	Pof	gammaSnap1							Mal-A3
Cerk		CG3760	Ptpmeg	GIIIspla2	ND-24							Cyp310a1
U2A		CG3764	sax	larp	Vha44							CG13043
CG9135		MBD-R2	wech	Abl	CG14516							pdm2
Vps16A		Trxr-1	CG4880	Rtf1	CG17746							pnt
CG15820		CG7609	gammaTub23C	CG42671	Aats-cys							unc-5
spd-2		Lint-1	Hmr	CG9646	ATPsynO							Bka
Fen1		LSm7	Smg6	chico	Cisd2							GlcAT-S
bip1		LSm1	Src64B	CG18004	VhaM9.7-b							E(spl)malpha-BFM
Gdi		CG6568	ena	nito	DENR							grn
DNApol-eta		U2A	gb	CG1951	nod							CG10650
Cctgamma		Prat	GalNAc-T1		Prosbeta4							CG34371
nopo		CG9135	RhoBTB		Glg1							RecQ5
ttm50		Vps16A	CG5439		Vha26							Tps1
CG12883		mbf1	dco		AP-1mu							CG5065
CG31075		Fen1	CG8370		Ranbp11							Socs36E
CG6927		bip1	Su(H)		CG4972							CG13049
CG5147		Gdi	CG32732		mRpL45							CG9336
Mtp		DNApol-eta	Dcp-1		CG4603							CG14710
Kr-h2		Cctgamma	CG9925		AnxB10							tinc
CG15047		nopo	Tis11		Prosbeta3							en
CG3356		ttm50	cno		CG11137							sls
Got2		Ork1	cta		CG9302							nkd
Orc4		CG10527	apt		CG32473							DNaseII
Orc2		CG31075	CG1275		CG12945							CG14095
rin		CG6927	JIL-1		CG6178							CG11007
CG33129		Cerk	CG10584		CG32625							yellow-e3
CG33123		CG42813	qkr58E-2		CG9328							CG30007
CG14931		CG5147	exd		Eno							CG5399
CG42813		Mtp	Pmm45A		Ost48							mib1
DNApol-alpha60		Kr-h2	Trf4-2		Trap1							CG12310
lds		CG15047	CG11982		IscU							CG13367
Sec5		CG3356	CG10492		Rheb							ltl
rgr		Orc4	csul		Phb2							Cog3
CG9149		rin	BTBD9		Pomp							CG3699
CG5721		CG33129	alpha-Man-Ia		CG8602							TwdlC
l(2)k14710		CG33123	Dronc		AP-1-2beta							TwdlW
CG6568		CG14931	Rab35		OstStt3							CG15213
sofe		DNApol-alpha60	bys		flr							CG7849
CG7852		lds	l(3)psg2		ND-MLRQ							rdgBbeta
MED30		Sec5	dah		CG31886							CG43366
D19A		rgr	Pabp2		CG8258							CG31522
mst		CG9149	CG6013		Atg4b							stumps
CG12241		CG5721	NTPase		Spase25							CG4658
CG13367		sofe	Ptpmeg2		trio							CG32564
spas		CG10932	GalT1		CG7461							LManVI
Use1		CG7852	jing		CG6937							CG10479
RanBPM		MED30	UbcE2H		Atg8a							CG11370
Zw10		D19A	g		CG5446							obst-A
Larp7		mst	fs(1)h		Muc12Ea							Ilp4
Rrp45		CG13367	insv		CHOp24							CG4829
Not11		spas	CG7872		beta4GalNAcTB							CG4194
ScpX		Use1	Ras64B		Grip71							ab
CG11076		RanBPM	POLDIP2		CG8312							comm2
trx		Zw10	Pax		ND-30							Msr-110
Hcs		Larp7	mio		Pka-R2							CG9588
DNApol-alpha180		Rrp45	CG42709		twr							cutlet
CG1620		Not11	Ibf1		P32							SPARC
CBP		CG11076	Saf-B		GlyP							CG13601
Pex11		trx	CG32767		Zwilch							CG16886
aralar1		Hcs	CdGAPr		ND-19							dyl
slif		DNApol-alpha180	Rab8		mats							CG10376
DhpD		CG1620	CG7139		Dhod							Trs20
Vps2		Jafrac1	Lon		Fit2							CG30101
CG10737		spd-2	CG1888		Pgk							ems
Dhpr		CBP	BEAF-32		Tim8							CG15369
aft		Pex11	RhoGAP54D		Aats-asn							CG6026
trsn		aralar1	CG17002		CG2218							Pgant35A
APC7		Dhfr	pzg		HP1c							CG10625
ovo		slif	subdued		CG5110							ph-p
Tspo		DhpD	Dyrk3		Mcm5							Gs2
DCTN1-p150		CG10737	CalpB		CG5885							Cpr78Cc
CG3711		Dhpr	CG11652		dom							CG30460
CG7277		aft	Fak		CG4390							CG7296
CG1598		trsn	fws		CG5532							CG11883
rdx		APC7	CG32365		CG1890							Jon25Biii
ras		ovo	Afti		Usp5							Elp3
CG12123		Tspo	chico		Vha16-1							CG10211
CG10932		DCTN1-p150	kdn		CG9034							CG31233
Etl1		CG3711	CG6406		fs(1)M3							CG2233
CG1890		CG1598	AnxB11		FK506-bp2							CG12480
yip2		rdx	CG2199		TER94							CG1674
SsRbeta		ras	CG14971		CG5727							CG9782
CG9986		CG12123	sstn		CG17776							CG9095
CG11699		Etl1	mthl1		CG3209							Obp44a
mRpL2		CG1890	CG4281		Ppox							CG8468
p38b		l(3)72Dn	ed		ND-23							CG13705
D12		yip2	CG8010		betaTub56D							FucT6
DCTN4-p62		SsRbeta	yrt		Vha55							run
CG34126		CG9986	smid		Mdh2							CG13926
CG10050		CG11699	ea		yps							Cht6
Mos		mRpL2	hb		CG12279							CG31002
jar		Rev1	temp		CG31344							CG14569
Msh6		p38b	Tes		ERp60							CG14543
ksh		D12	pic		Nup37							Pvr
CG4842		vih	CG17129		Snap29							ckn
Mat1		DCTN4-p62	myo		CG8132							CG3149
CG3815		CG11883	d4		Ubc4							brk
dpa		CG34126	Ref1		mad2							TwdlBeta
ebd2		CG10050	pod1		Arp10							Osi14
Tapdelta		Mos			ND-51							CG7299
Lrr47		jar			Tap42							E(spl)m7-HLH
CG6287		Msh6			Vha100-2							comm
CG6511		ksh										CG7465
Marcal1		CG4842										CG8213
Ets97D		Mat1										dpn
Caf1-105		CG3815										CG33099
DNApol-delta		dpa										CG7714
CG11876		ebd2										Rint1
wkd		Tapdelta										Notum
CG5382		Lrr47										CG1648
CG4603		CG6287										CG6118
CG12173		CG6511										CG15080
Elp3		Marcal1										CG15212
Alg10		CG7277										CG4050
AnxB10		Ets97D										Sec8
sut1		Caf1-105										CG12581
CG11899		DNApol-delta										Atac2
CG31548		CG11876										Bro
cutlet		wkd										Amph
tral		CG5382										Tre1
GCS1		CG4603										scw
Pex5		CG12173										Obp99c
Rab7		Elp3										gt
CG9344		Cdk8										drl
Ccs		Alg10										vvl
CG3939		AnxB10										CG14265
CG2046		sut1										CG15382
CG7033		CG11899										CG7339
Sse		CG31548										neo
CG2990		cutlet										CG3502
CG7744		tral										CG34383
CG7745		GCS1										TpnC47D
CG6293		Pex5										CG11170
Hsp26		Rab7										odd
CG31249		CG9344										frac
CG17018		Ccs										CG1368
Jra		CG3939										Vps36
		spartin										wda
		CG2046										l(1)sc
		CG7033										CG15628
		Sse										opa
		CG2990										l(2)37Cg
		CG7744										CG5177
		CG7745										Cad99C
		CG6293										CG43085
		Hsp26										Rab19
		CG12107										JTBR
		CG17018										slp1
		Cks30A										CG4585
		Jra										CG13921
												CG15876
												CG5989
												SP1173
												mms4
												Osi20
												Ppn
												CG13069
												mRpS18A
												Mctp
												otk
												CG44245
												CG4702
												CG13059
												Ccp84Ag
												bowl
												CG8993
												CG8960
												CG3038
												CG30413
												Prm
												CG7298
												dsx-c73A
												CG15740
												Brd
												CG16884
												TwdlB
												CG9628
												CG13731
												CG16885
												tsh
												Spn43Aa
												CG18649
												Ocho
												CG17290
												CG7730
												bol
												CG43184
												Phk-3
												CG3368
												Osi15
												CG9992
												Rtc1
												pros
												Trs23
												tnc
												ect
												stan
												CG8157
												CG30015
												nahoda
												CG12420
												CG34380
												trus
												Mdr49
												TpnC73F
												pall
												TwdlL
												Gasp
												CG43164
												CG15022
												Mipp1
												CG31198
												ush
												NiPp1
												Cadps
												CG11131
												Galphas
												Mp20
												bt
												sog
												E(spl)m4-BFM
												CG32109
												twi
												tara
												gbb
												spo
												l(2)03659
												CG10598
												CG2930
												CG30457
												mesh
												CG14629
												hbs
												Neurochondrin
												CG13463
												CG15239
												Mvl
												Toll-7
												bsk
												CG4115
												rib
												CG4045
												CG34214
												fkh
												CG10463
												CG9411
												l(2)37Cb
												CG34224
												Lcp65Ae
												salm
												CG5171
												CG5114
												dan
												CG15282
												CG12009
												CG5708
												RpI135
												Cpr47Eg
												trbl
												CG7884
												Bsg25A
												Tet
												CG14040
												CG14756
												sna
												tna
												Traf4
												fon
												ImpL1
												bib
												TwdlY
												bnk
												Sr-CII
												TwdlF
												CG13492
												Scp1
												CG14110
												ci
												IntS2
												Clect27
												CG43332
												CG6878
												CG31626
												Egfr
												grh
												CG11584
												Ime4
												serp
												TwdlN
												CG14014
												Kr
												hth
												ptc
												SoxN
												CG5059
												Elba3
												sca
												Ppa
												CG10591
												HmgZ
												CG14915
												ds
												Glt
												Mlc1
												TwdlD
												Mlp60A
												noc
												CadN
												CG4500
												sas
												prc
												Rap2l
												Cpr51A
												Cpr65Ea
												CG3108
												D
												TwdlM
												Parg
												verm
												Toll-6
												trn
												Ance
												wupA
												Osi7
												l(3)neo38
												elav
												ft
												CG13159
												uif
												ImpE1
												Apoltp
												Tig
												Tm2
												CG10953
												CG2962
												Tom
												Mlc2
												Ptr
												Dscam1
												robo2
												CG31813
												Inx3
												Mhc
												link
												ImpE2
												Nplp2
												up
												Obp99a
												Osi6
												Ama
												CG9184
												Dtg
												cort
												CG13427
												CG10035
												CG4440
												bnb
