# Supplementary material for: mRNA poly(A)-tail changes specified by deadenylation broadly reshape translation in Drosophila oocytes and early embryos
Source: eLife journal article supplement (doi:10.7554/elife.16955), 2016-07-30

Figure 3 displays the TE fold change across developmental stages. The left panel is a heatmap showing TE fold change (log<sub>2</sub>) for 8 clusters (1 to 8\*) across two stages: 0-1 h embryo (Stage 14) and 2-3 h embryo (Stage 14). The color scale ranges from -4 (blue) to 4 (red). The right panel shows line plots of TE fold change (log<sub>2</sub>) for each cluster across three stages: St. 14, 0-1 h, and 2-3 h. The y-axis for all plots is TE fold change (log<sub>2</sub>), with a zero line indicated.

**Heatmap Data (Approximate TE fold change values):**

| Cluster | 0-1 h embryo (Stage 14) | 2-3 h embryo (Stage 14) |
|---------|-------------------------|-------------------------|
| 1       | ~1.5                    | ~2.5                    |
| 2*      | ~2.5                    | ~1.5                    |
| 3*      | ~2.5                    | ~-1.5                   |
| 4       | ~-1.5                   | ~1.5                    |
| 5*      | ~-1.5                   | ~-2.5                   |
| 6       | ~-2.5                   | ~-1.5                   |
| 7*      | ~-2.5                   | ~-2.5                   |
| 8*      | ~-2.5                   | ~-2.5                   |

**Line Plot Data (Approximate TE fold change values):**

| Cluster | St. 14 | 0-1 h | 2-3 h |
|---------|--------|-------|-------|
| 1       | 0      | ~1.5  | ~3.0  |
| 2       | 0      | ~2.5  | ~2.5  |
| 3       | 0      | ~3.0  | ~0    |
| 4       | 0      | 0     | ~1.5  |
| 5       | 0      | 0     | ~-1.5 |
| 6       | 0      | ~-1.5 | 0     |
| 7       | 0      | ~-1.5 | ~-1.5 |
| 8       | 0      | ~-1.5 | ~-3.0 |

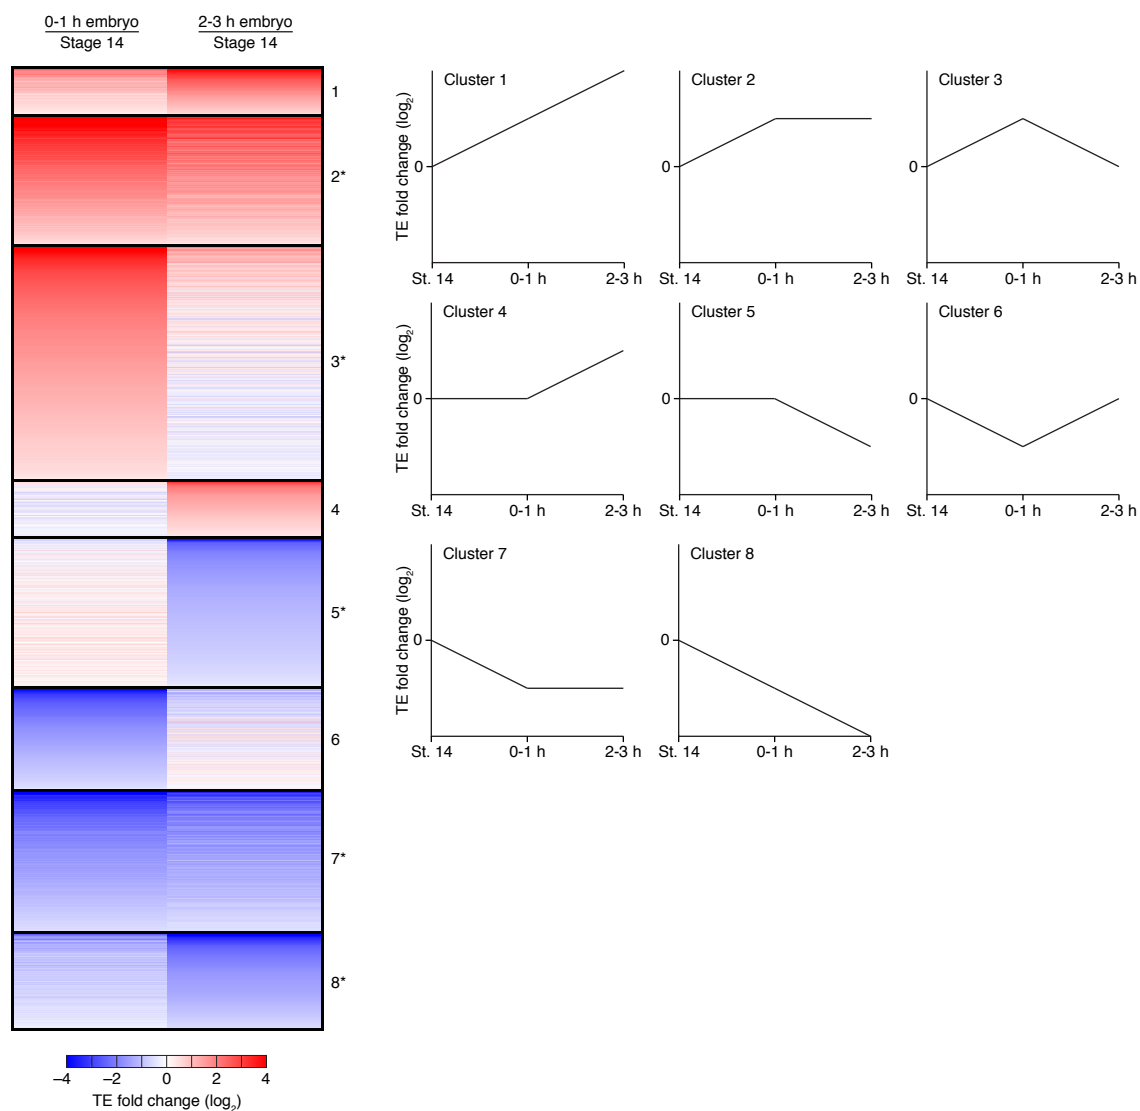

Supplement: supp [file x2212;figure_supplement_1.pdf › elife_poa_e16955_Figure_1−figure_supplement_1.pdf]
