# Supplementary figures and images for: mRNA poly(A)-tail changes specified by deadenylation broadly reshape translation in Drosophila oocytes and early embryos
Source: eLife journal article supplement (doi:10.7554/elife.16955), 2016-07-30

Figure 6—figure supplement 1

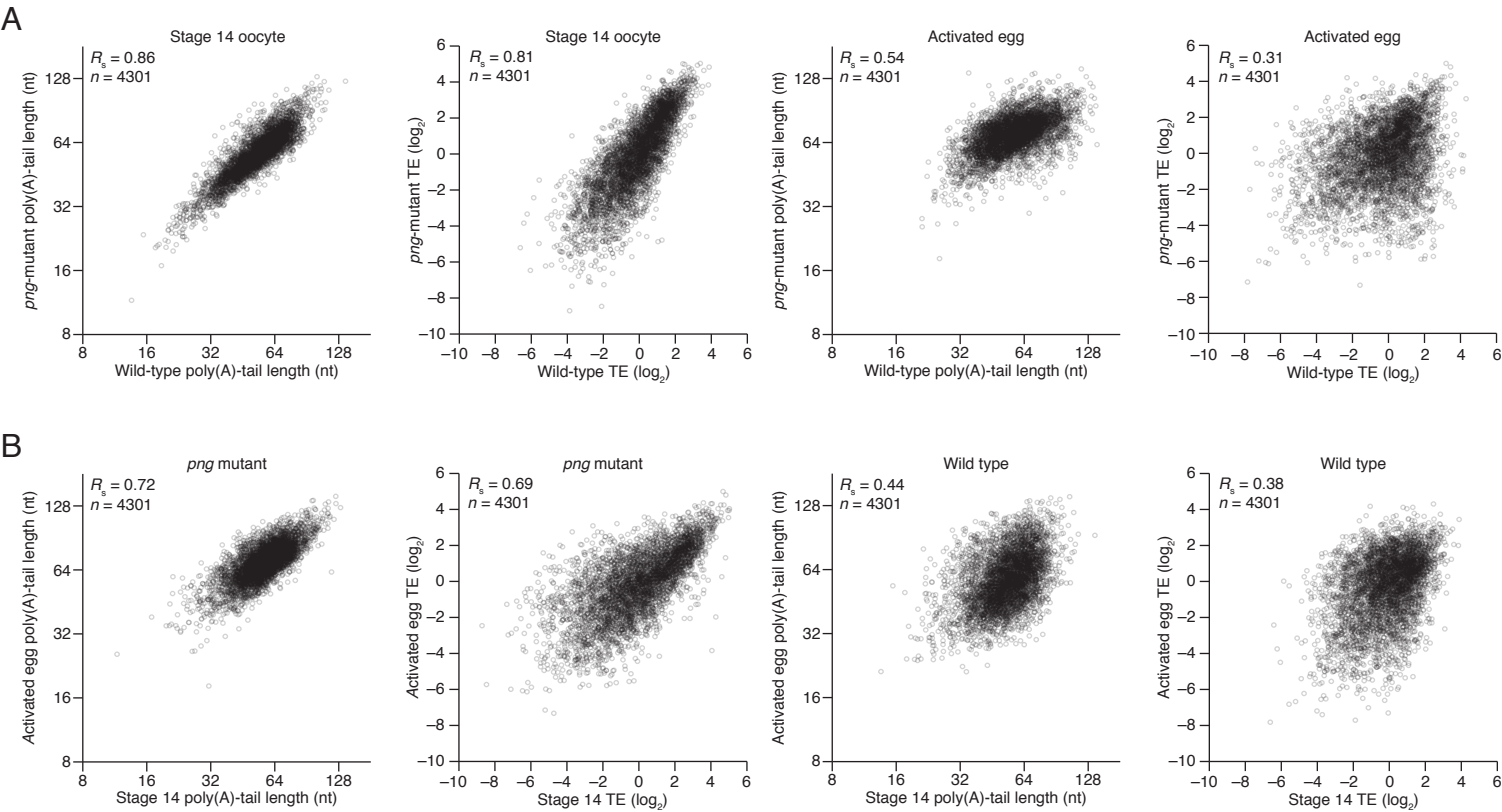

Supplement: supp [file elife-16955-supp-v1.zip › elife_poa_e16955_Figure_6−figure_supplement_1.pdf]

Figure 5—figure supplement 1

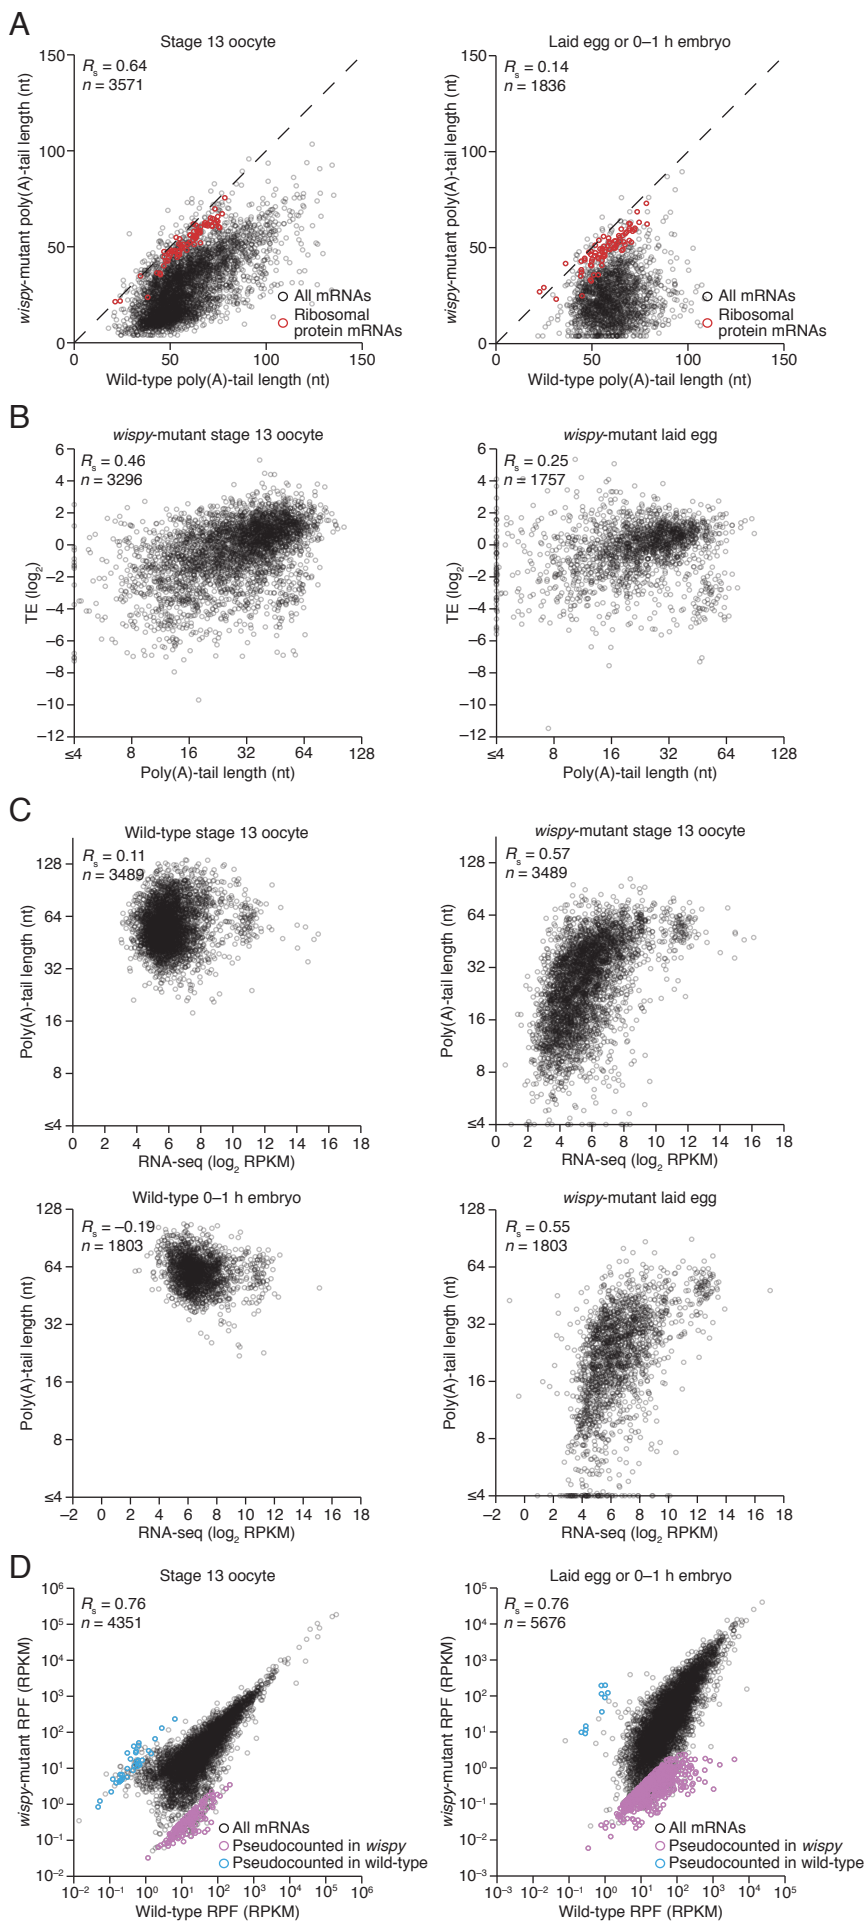

Supplement: supp [file elife-16955-supp-v1.zip › elife_poa_e16955_Figure_5−figure_supplement_1.pdf]

Figure 7—figure supplement 1

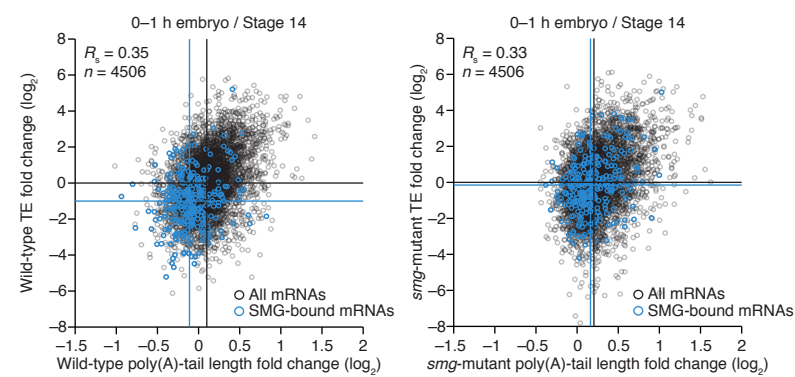

Supplement: supp [file elife-16955-supp-v1.zip › elife_poa_e16955_Figure_7−figure_supplement_1.pdf]

Figure 2—figure supplement 1

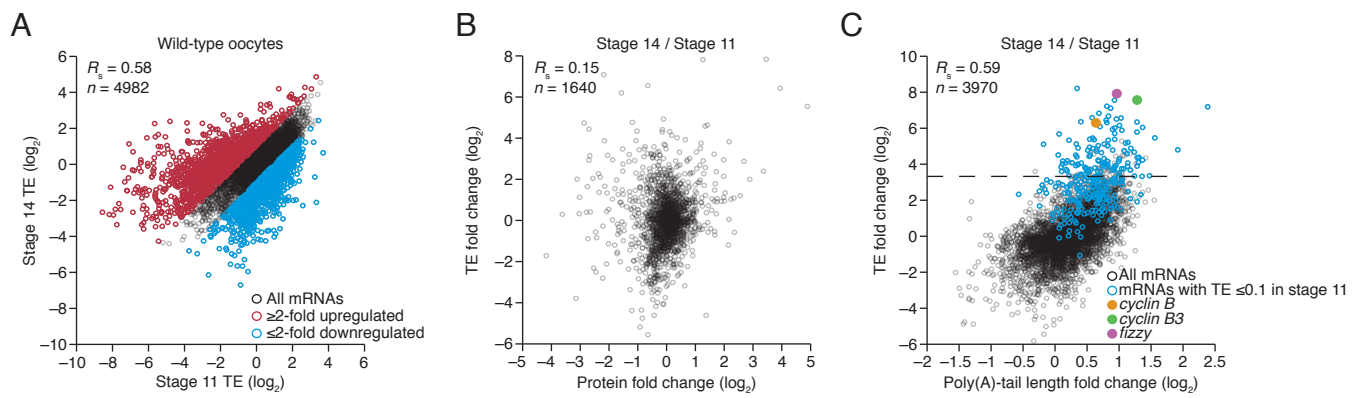

Supplement: supp [file elife-16955-supp-v1.zip › elife_poa_e16955_Figure_2−figure_supplement_1.pdf]

Figure 7—figure supplement 2

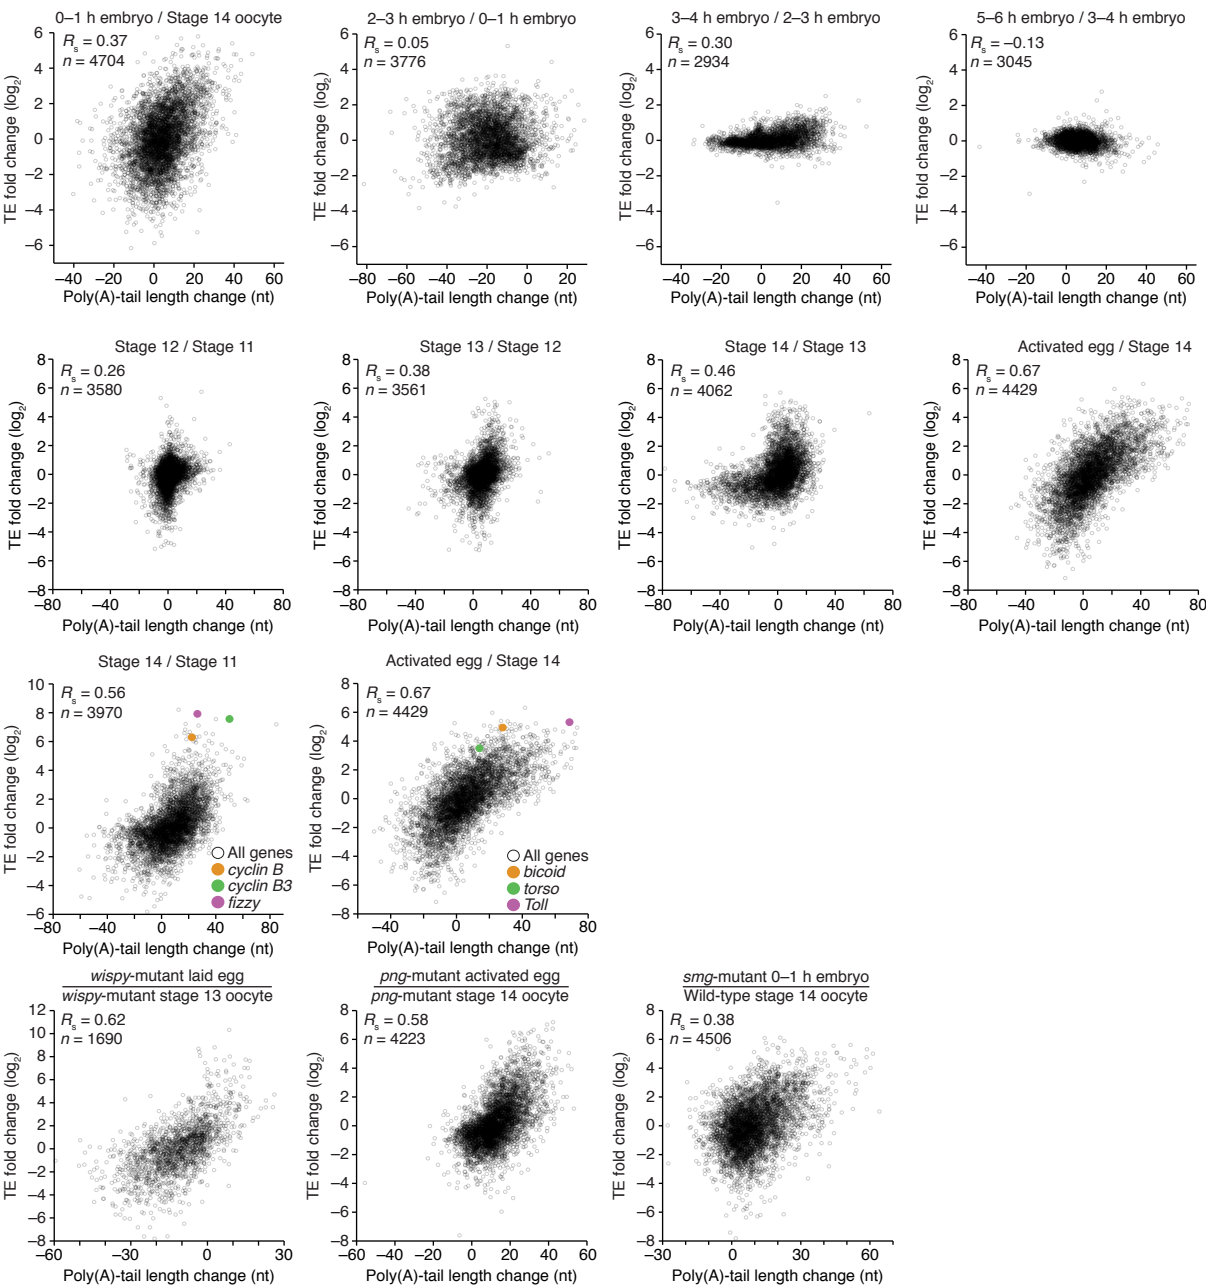

Supplement: supp [file elife-16955-supp-v1.zip › elife_poa_e16955_Figure_7−_figure_supplement_2.pdf]

Figure 2—figure supplement 2

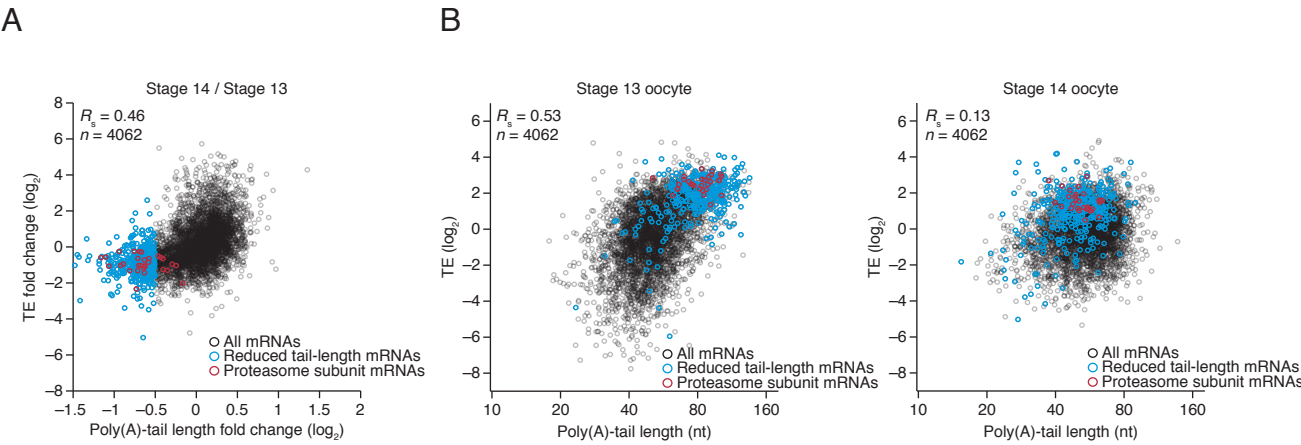

Supplement: supp [file elife-16955-supp-v1.zip › elife_poa_e16955_Figure_2−figure_supplement_2.pdf]

Figure 1—figure supplement 1

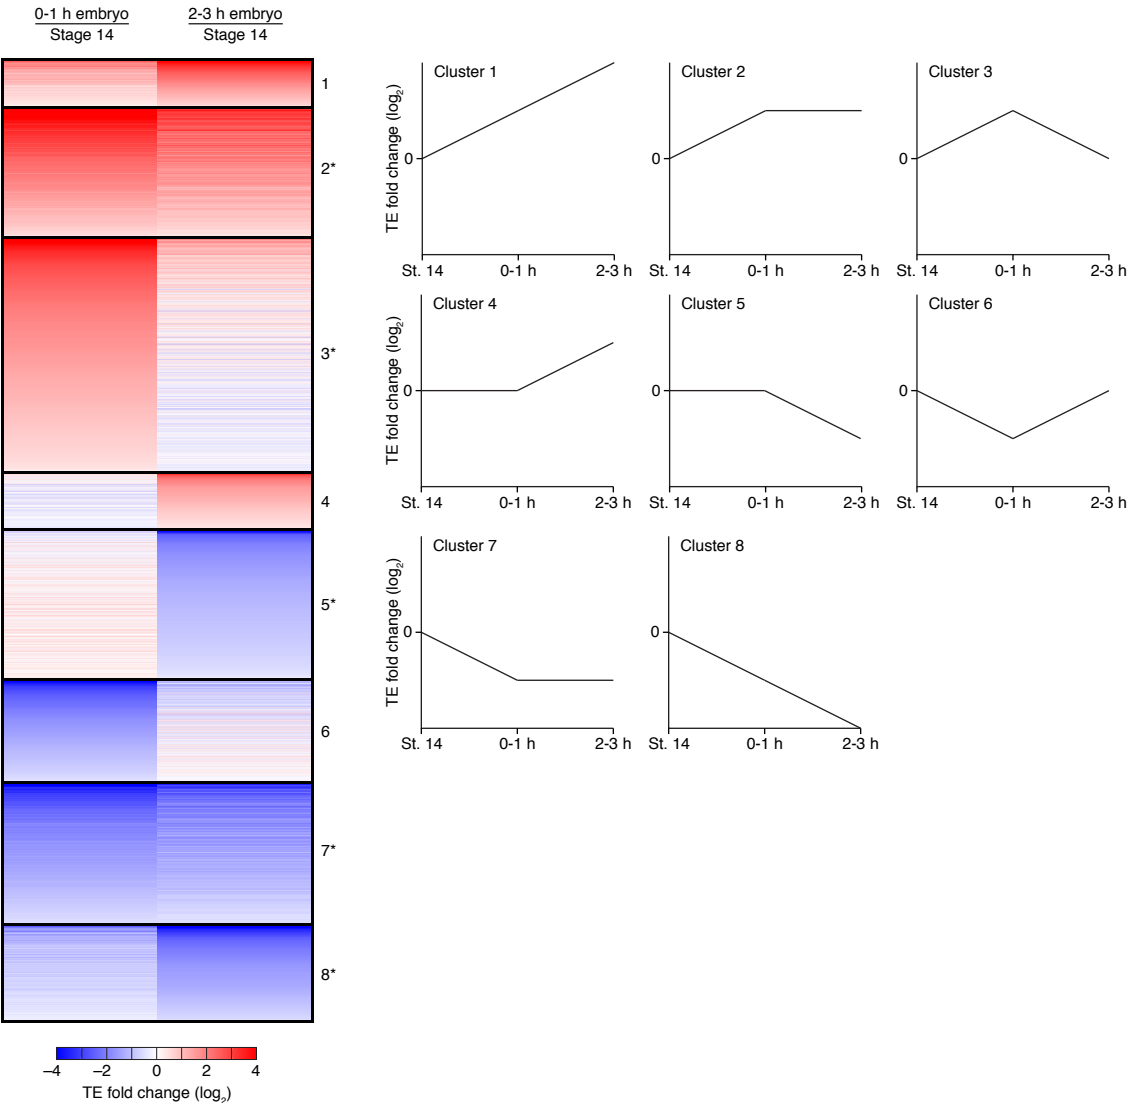

Supplement: supp [file elife-16955-supp-v1.zip › elife_poa_e16955_Figure_1−figure_supplement_1.pdf]
